# Supplementary material
Source: MDPI journal article supplement (https://www.mdpi.com/1099-4300/19/6/292)
Supplement: s1 [file s1]

## Sheet: 1990-2016
R/C	C1	CCl	σ	e^	B0		1	3	6	12	24	36	60	84	120	240	360	RMSE All	RMSE 1m to 2 yr		Date	1 mo	3 mo	6 mo	1 yr	2 yr	3 yr	5 yr	7 yr	10 yr	20 yr	30 yr	Date	R/C
1	1	1	1	1	8		8	8	8	8	8	8	8	8	8	8	8	0.106558	0.137113		1990-01-02	N/A	7.83	7.89	7.81	7.87	7.9	7.87	7.98	7.94	N/A	8	1990-01-02	1
1	1	1	1	1	8.04		8.04	8.04	8.04	8.04	8.04	8.04	8.04	8.04	8.04	8.04	8.04	0.0962478	0.125379		1990-01-03	N/A	7.89	7.94	7.85	7.94	7.96	7.92	8.04	7.99	N/A	8.04	1990-01-03	1
1	1	1	1	1	8.04		8.04	8.04	8.04	8.04	8.04	8.04	8.04	8.04	8.04	8.04	8.04	0.118858	0.156461		1990-01-04	N/A	7.84	7.9	7.82	7.92	7.93	7.91	8.02	7.98	N/A	8.04	1990-01-04	1
1	1	1	1	1	8.06		8.06	8.06	8.06	8.06	8.06	8.06	8.06	8.06	8.06	8.06	8.06	0.152345	0.207605		1990-01-05	N/A	7.79	7.85	7.79	7.9	7.94	7.92	8.03	7.99	N/A	8.06	1990-01-05	1
1	1	1	1	1	8.09		8.09	8.09	8.09	8.09	8.09	8.09	8.09	8.09	8.09	8.09	8.09	0.166132	0.22298		1990-01-08	N/A	7.79	7.88	7.81	7.9	7.95	7.92	8.05	8.02	N/A	8.09	1990-01-08	1
1	1	1	1	1	8.1		8.1	8.1	8.1	8.1	8.1	8.1	8.1	8.1	8.1	8.1	8.1	0.184342	0.24775		1990-01-09	N/A	7.8	7.82	7.78	7.91	7.94	7.92	8.05	8.02	N/A	8.1	1990-01-09	1
1	1	1	1	1	8.11		8.11	8.11	8.11	8.11	8.11	8.11	8.11	8.11	8.11	8.11	8.11	0.207649	0.280749		1990-01-10	N/A	7.75	7.78	7.77	7.91	7.95	7.92	8	8.03	N/A	8.11	1990-01-10	1
1	1	1	1	1	8.11		8.11	8.11	8.11	8.11	8.11	8.11	8.11	8.11	8.11	8.11	8.11	0.194749	0.263742		1990-01-11	N/A	7.8	7.8	7.77	7.91	7.95	7.94	8.01	8.04	N/A	8.11	1990-01-11	1
1	1	1	1	1	8.17		8.17	8.17	8.17	8.17	8.17	8.17	8.17	8.17	8.17	8.17	8.17	0.238099	0.328694		1990-01-12	N/A	7.74	7.81	7.76	7.93	7.98	7.99	8.07	8.1	N/A	8.17	1990-01-12	1
1	1	1	1	1	8.25		8.25	8.25	8.25	8.25	8.25	8.25	8.25	8.25	8.25	8.25	8.25	0.183402	0.256359		1990-01-16	N/A	7.89	7.99	7.92	8.1	8.13	8.11	8.18	8.2	N/A	8.25	1990-01-16	1
1	1	1	1	1	8.25		8.25	8.25	8.25	8.25	8.25	8.25	8.25	8.25	8.25	8.25	8.25	0.177662	0.244131		1990-01-17	N/A	7.97	7.97	7.91	8.09	8.11	8.11	8.17	8.19	N/A	8.25	1990-01-17	1
1	1	1	1	1	8.35		8.35	8.35	8.35	8.35	8.35	8.35	8.35	8.35	8.35	8.35	8.35	0.160341	0.231948		1990-01-18	N/A	8.04	8.08	8.05	8.25	8.28	8.27	8.31	8.32	N/A	8.35	1990-01-18	1
1	1	1	1	1	8.29		8.29	8.29	8.29	8.29	8.29	8.29	8.29	8.29	8.29	8.29	8.29	0.156612	0.225699		1990-01-19	N/A	8	8.01	8	8.2	8.23	8.2	8.24	8.26	N/A	8.29	1990-01-19	1
1	1	1	1	1	8.31		8.31	8.31	8.31	8.31	8.31	8.31	8.31	8.31	8.31	8.31	8.31	0.181484	0.257138		1990-01-22	N/A	7.99	7.99	7.98	8.18	8.2	8.19	8.25	8.27	N/A	8.31	1990-01-22	1
1	1	1	1	1	8.29		8.29	8.29	8.29	8.29	8.29	8.29	8.29	8.29	8.29	8.29	8.29	0.183699	0.263249		1990-01-23	N/A	7.93	7.97	7.97	8.18	8.2	8.18	8.23	8.26	N/A	8.29	1990-01-23	1
1	1	1	1	1	8.41		8.41	8.41	8.41	8.41	8.41	8.41	8.41	8.41	8.41	8.41	8.41	0.244224	0.351852		1990-01-24	N/A	7.93	7.99	8	8.2	8.29	8.28	8.34	8.38	N/A	8.41	1990-01-24	1
1	1	1	1	1	8.46		8.46	8.46	8.46	8.46	8.46	8.46	8.46	8.46	8.46	8.46	8.46	0.260157	0.373068		1990-01-25	N/A	7.95	8.01	8.03	8.24	8.32	8.31	8.39	8.42	N/A	8.46	1990-01-25	1
1	1	1	1	1	8.55		8.55	8.55	8.55	8.55	8.55	8.55	8.55	8.55	8.55	8.55	8.55	0.304392	0.435385		1990-01-26	N/A	7.93	8.04	8.07	8.28	8.38	8.38	8.45	8.49	N/A	8.55	1990-01-26	1
1	1	1	1	1	8.54		8.54	8.54	8.54	8.54	8.54	8.54	8.54	8.54	8.54	8.54	8.54	0.272697	0.390717		1990-01-29	N/A	8	8.09	8.08	8.3	8.39	8.39	8.45	8.5	N/A	8.54	1990-01-29	1
1	1	1	1	1	8.55		8.55	8.55	8.55	8.55	8.55	8.55	8.55	8.55	8.55	8.55	8.55	0.268447	0.385927		1990-01-30	N/A	8	8.14	8.09	8.3	8.39	8.43	8.47	8.51	N/A	8.55	1990-01-30	1
1	1	1	1	1	8.46		8.46	8.46	8.46	8.46	8.46	8.46	8.46	8.46	8.46	8.46	8.46	0.218507	0.315373		1990-01-31	N/A	8	8.13	8.08	8.28	8.36	8.35	8.39	8.43	N/A	8.46	1990-01-31	1
1	1	1	1	1	8.44		8.44	8.44	8.44	8.44	8.44	8.44	8.44	8.44	8.44	8.44	8.44	0.200182	0.290034		1990-02-01	N/A	8.02	8.13	8.09	8.28	8.35	8.35	8.38	8.42	N/A	8.44	1990-02-01	1
1	1	1	1	1	8.51		8.51	8.51	8.51	8.51	8.51	8.51	8.51	8.51	8.51	8.51	8.51	0.211123	0.307636		1990-02-02	N/A	8.07	8.17	8.13	8.37	8.43	8.42	8.46	8.5	N/A	8.51	1990-02-02	1
1	1	1	1	1	8.53		8.53	8.53	8.53	8.53	8.53	8.53	8.53	8.53	8.53	8.53	8.53	0.216501	0.314643		1990-02-05	N/A	8.08	8.18	8.15	8.37	8.43	8.44	8.48	8.53	N/A	8.53	1990-02-05	1
1	1	1	1	1	8.58		8.58	8.58	8.58	8.58	8.58	8.58	8.58	8.58	8.58	8.58	8.58	0.243647	0.351767		1990-02-06	N/A	8.09	8.17	8.15	8.42	8.43	8.49	8.52	8.57	N/A	8.58	1990-02-06	1
1	1	1	1	1	8.57		8.57	8.57	8.57	8.57	8.57	8.57	8.57	8.57	8.57	8.57	8.57	0.232438	0.336749		1990-02-07	N/A	8.08	8.19	8.17	8.42	8.43	8.51	8.53	8.52	N/A	8.57	1990-02-07	1
1	1	1	1	1	8.5		8.5	8.5	8.5	8.5	8.5	8.5	8.5	8.5	8.5	8.5	8.5	0.201742	0.294143		1990-02-08	N/A	8.08	8.18	8.13	8.37	8.39	8.45	8.48	8.49	N/A	8.5	1990-02-08	1
1	1	1	1	1	8.36		8.36	8.36	8.36	8.36	8.36	8.36	8.36	8.36	8.36	8.36	8.36	0.173651	0.248797		1990-02-09	N/A	8.02	8.09	8.03	8.25	8.24	8.29	8.34	8.31	N/A	8.36	1990-02-09	1
1	1	1	1	1	8.43		8.43	8.43	8.43	8.43	8.43	8.43	8.43	8.43	8.43	8.43	8.43	0.204939	0.298329		1990-02-12	N/A	7.99	8.11	8.06	8.32	8.32	8.37	8.41	8.4	N/A	8.43	1990-02-12	1
1	1	1	1	1	8.39		8.39	8.39	8.39	8.39	8.39	8.39	8.39	8.39	8.39	8.39	8.39	0.261082	0.375473		1990-02-13	N/A	7.84	7.97	7.95	8.21	8.21	8.29	8.36	8.35	N/A	8.39	1990-02-13	1
1	1	1	1	1	8.41		8.41	8.41	8.41	8.41	8.41	8.41	8.41	8.41	8.41	8.41	8.41	0.243684	0.353186		1990-02-14	N/A	7.87	8	8.03	8.27	8.27	8.34	8.36	8.36	N/A	8.41	1990-02-14	1
1	1	1	1	1	8.47		8.47	8.47	8.47	8.47	8.47	8.47	8.47	8.47	8.47	8.47	8.47	0.227216	0.330484		1990-02-15	N/A	7.97	8.08	8.11	8.35	8.35	8.4	8.44	8.43	N/A	8.47	1990-02-15	1
1	1	1	1	1	8.46		8.46	8.46	8.46	8.46	8.46	8.46	8.46	8.46	8.46	8.46	8.46	0.23136	0.337461		1990-02-16	N/A	7.94	8.07	8.09	8.36	8.34	8.41	8.43	8.42	N/A	8.46	1990-02-16	1
1	1	1	1	1	8.66		8.66	8.66	8.66	8.66	8.66	8.66	8.66	8.66	8.66	8.66	8.66	0.269022	0.391816		1990-02-20	N/A	8.06	8.2	8.24	8.52	8.52	8.58	8.63	8.62	N/A	8.66	1990-02-20	1
1	1	1	1	1	8.66		8.66	8.66	8.66	8.66	8.66	8.66	8.66	8.66	8.66	8.66	8.66	0.284173	0.415355		1990-02-21	N/A	8.01	8.19	8.22	8.5	8.52	8.6	8.63	8.62	N/A	8.66	1990-02-21	1
1	1	1	1	1	8.56		8.56	8.56	8.56	8.56	8.56	8.56	8.56	8.56	8.56	8.56	8.56	0.24689	0.362547		1990-02-22	N/A	7.99	8.15	8.17	8.45	8.48	8.48	8.57	8.54	N/A	8.56	1990-02-22	1
1	1	1	1	1	8.56		8.56	8.56	8.56	8.56	8.56	8.56	8.56	8.56	8.56	8.56	8.56	0.279334	0.409194		1990-02-23	N/A	7.93	8.09	8.11	8.43	8.45	8.47	8.56	8.53	N/A	8.56	1990-02-23	1
1	1	1	1	1	8.49		8.49	8.49	8.49	8.49	8.49	8.49	8.49	8.49	8.49	8.49	8.49	0.235816	0.344848		1990-02-26	N/A	7.97	8.09	8.1	8.38	8.4	8.4	8.49	8.46	N/A	8.49	1990-02-26	1
1	1	1	1	1	8.45		8.45	8.45	8.45	8.45	8.45	8.45	8.45	8.45	8.45	8.45	8.45	0.218362	0.31569		1990-02-27	N/A	7.99	8.1	8.06	8.34	8.34	8.34	8.43	8.41	N/A	8.45	1990-02-27	1
1	1	1	1	1	8.54		8.54	8.54	8.54	8.54	8.54	8.54	8.54	8.54	8.54	8.54	8.54	0.236931	0.345977		1990-02-28	N/A	8.04	8.14	8.12	8.43	8.45	8.44	8.54	8.51	N/A	8.54	1990-02-28	1
1	1	1	1	1	8.61		8.61	8.61	8.61	8.61	8.61	8.61	8.61	8.61	8.61	8.61	8.61	0.240643	0.353186		1990-03-01	N/A	8.08	8.19	8.21	8.53	8.53	8.53	8.62	8.59	N/A	8.61	1990-03-01	1
1	1	1	1	1	8.55		8.55	8.55	8.55	8.55	8.55	8.55	8.55	8.55	8.55	8.55	8.55	0.222506	0.32836		1990-03-02	N/A	8.02	8.17	8.22	8.48	8.5	8.5	8.57	8.54	N/A	8.55	1990-03-02	1
1	1	1	1	1	8.66		8.66	8.66	8.66	8.66	8.66	8.66	8.66	8.66	8.66	8.66	8.66	0.238156	0.349743		1990-03-05	N/A	8.09	8.27	8.31	8.55	8.59	8.58	8.69	8.65	N/A	8.66	1990-03-05	1
1	1	1	1	1	8.59		8.59	8.59	8.59	8.59	8.59	8.59	8.59	8.59	8.59	8.59	8.59	0.186742	0.275608		1990-03-06	N/A	8.17	8.24	8.31	8.54	8.56	8.57	8.64	8.59	N/A	8.59	1990-03-06	1
1	1	1	1	1	8.58		8.58	8.58	8.58	8.58	8.58	8.58	8.58	8.58	8.58	8.58	8.58	0.185644	0.273971		1990-03-07	N/A	8.18	8.22	8.29	8.54	8.55	8.56	8.63	8.58	N/A	8.58	1990-03-07	1
1	1	1	1	1	8.56		8.56	8.56	8.56	8.56	8.56	8.56	8.56	8.56	8.56	8.56	8.56	0.16404	0.241578		1990-03-08	N/A	8.18	8.24	8.35	8.59	8.58	8.57	8.62	8.57	N/A	8.56	1990-03-08	1
1	1	1	1	1	8.63		8.63	8.63	8.63	8.63	8.63	8.63	8.63	8.63	8.63	8.63	8.63	0.159972	0.230565		1990-03-09	N/A	8.26	8.33	8.46	8.73	8.71	8.68	8.71	8.65	N/A	8.63	1990-03-09	1
1	1	1	1	1	8.62		8.62	8.62	8.62	8.62	8.62	8.62	8.62	8.62	8.62	8.62	8.62	0.156554	0.225477		1990-03-12	N/A	8.26	8.33	8.44	8.71	8.7	8.67	8.7	8.63	N/A	8.62	1990-03-12	1
1	1	1	1	1	8.72		8.72	8.72	8.72	8.72	8.72	8.72	8.72	8.72	8.72	8.72	8.72	0.196145	0.288479		1990-03-13	N/A	8.26	8.34	8.48	8.77	8.77	8.75	8.78	8.73	N/A	8.72	1990-03-13	1
1	1	1	1	1	8.61		8.61	8.61	8.61	8.61	8.61	8.61	8.61	8.61	8.61	8.61	8.61	0.166269	0.236981		1990-03-14	N/A	8.23	8.31	8.41	8.69	8.7	8.67	8.71	8.65	N/A	8.61	1990-03-14	1
1	1	1	1	1	8.63		8.63	8.63	8.63	8.63	8.63	8.63	8.63	8.63	8.63	8.63	8.63	0.177534	0.255852		1990-03-15	N/A	8.21	8.32	8.41	8.71	8.7	8.69	8.73	8.66	N/A	8.63	1990-03-15	1
1	1	1	1	1	8.55		8.55	8.55	8.55	8.55	8.55	8.55	8.55	8.55	8.55	8.55	8.55	0.153623	0.219727		1990-03-16	N/A	8.19	8.29	8.36	8.64	8.62	8.61	8.64	8.59	N/A	8.55	1990-03-16	1
1	1	1	1	1	8.54		8.54	8.54	8.54	8.54	8.54	8.54	8.54	8.54	8.54	8.54	8.54	0.147525	0.19799		1990-03-19	N/A	8.22	8.32	8.38	8.68	8.66	8.65	8.66	8.59	N/A	8.54	1990-03-19	1
1	1	1	1	1	8.47		8.47	8.47	8.47	8.47	8.47	8.47	8.47	8.47	8.47	8.47	8.47	0.132939	0.151658		1990-03-20	N/A	8.25	8.35	8.38	8.68	8.65	8.61	8.62	8.54	N/A	8.47	1990-03-20	1
1	1	1	1	1	8.47		8.47	8.47	8.47	8.47	8.47	8.47	8.47	8.47	8.47	8.47	8.47	0.141389	0.16081		1990-03-21	N/A	8.23	8.34	8.39	8.69	8.66	8.62	8.63	8.55	N/A	8.47	1990-03-21	1
1	1	1	1	1	8.49		8.49	8.49	8.49	8.49	8.49	8.49	8.49	8.49	8.49	8.49	8.49	0.144474	0.198293		1990-03-22	N/A	8.17	8.27	8.32	8.62	8.6	8.56	8.61	8.53	N/A	8.49	1990-03-22	1
1	1	1	1	1	8.48		8.48	8.48	8.48	8.48	8.48	8.48	8.48	8.48	8.48	8.48	8.48	0.147617	0.205085		1990-03-23	N/A	8.15	8.26	8.29	8.61	8.59	8.54	8.59	8.52	N/A	8.48	1990-03-23	1
1	1	1	1	1	8.47		8.47	8.47	8.47	8.47	8.47	8.47	8.47	8.47	8.47	8.47	8.47	0.144851	0.2001		1990-03-26	N/A	8.13	8.28	8.3	8.61	8.59	8.52	8.58	8.51	N/A	8.47	1990-03-26	1
1	1	1	1	1	8.48		8.48	8.48	8.48	8.48	8.48	8.48	8.48	8.48	8.48	8.48	8.48	0.131599	0.177482		1990-03-27	N/A	8.17	8.3	8.35	8.59	8.6	8.55	8.59	8.52	N/A	8.48	1990-03-27	1
1	1	1	1	1	8.47		8.47	8.47	8.47	8.47	8.47	8.47	8.47	8.47	8.47	8.47	8.47	0.143432	0.19601		1990-03-28	N/A	8.12	8.27	8.33	8.57	8.6	8.53	8.58	8.51	N/A	8.47	1990-03-28	1
1	1	1	1	1	8.58		8.58	8.58	8.58	8.58	8.58	8.58	8.58	8.58	8.58	8.58	8.58	0.186474	0.272176		1990-03-29	N/A	8.1	8.28	8.36	8.62	8.65	8.6	8.66	8.6	N/A	8.58	1990-03-29	1
1	1	1	1	1	8.63		8.63	8.63	8.63	8.63	8.63	8.63	8.63	8.63	8.63	8.63	8.63	0.224317	0.329909		1990-03-30	N/A	8.07	8.24	8.35	8.64	8.69	8.65	8.7	8.65	N/A	8.63	1990-03-30	1
1	1	1	1	1	8.63		8.63	8.63	8.63	8.63	8.63	8.63	8.63	8.63	8.63	8.63	8.63	0.230927	0.340764		1990-04-02	N/A	8.05	8.23	8.34	8.62	8.67	8.65	8.69	8.65	N/A	8.63	1990-04-02	1
1	1	1	1	1	8.61		8.61	8.61	8.61	8.61	8.61	8.61	8.61	8.61	8.61	8.61	8.61	0.211789	0.311159		1990-04-03	N/A	8.09	8.25	8.32	8.61	8.65	8.64	8.69	8.63	N/A	8.61	1990-04-03	1
1	1	1	1	1	8.52		8.52	8.52	8.52	8.52	8.52	8.52	8.52	8.52	8.52	8.52	8.52	0.205139	0.298496		1990-04-04	N/A	8.01	8.17	8.27	8.54	8.59	8.56	8.62	8.55	N/A	8.52	1990-04-04	1
1	1	1	1	1	8.52		8.52	8.52	8.52	8.52	8.52	8.52	8.52	8.52	8.52	8.52	8.52	0.201607	0.291067		1990-04-05	N/A	8.02	8.18	8.28	8.54	8.6	8.57	8.63	8.57	N/A	8.52	1990-04-05	1
1	1	1	1	1	8.52		8.52	8.52	8.52	8.52	8.52	8.52	8.52	8.52	8.52	8.52	8.52	0.204806	0.299065		1990-04-06	N/A	8.02	8.16	8.26	8.52	8.58	8.55	8.61	8.56	N/A	8.52	1990-04-06	1
1	1	1	1	1	8.55		8.55	8.55	8.55	8.55	8.55	8.55	8.55	8.55	8.55	8.55	8.55	0.189904	0.276297		1990-04-09	N/A	8.09	8.23	8.29	8.54	8.6	8.58	8.65	8.59	N/A	8.55	1990-04-09	1
1	1	1	1	1	8.57		8.57	8.57	8.57	8.57	8.57	8.57	8.57	8.57	8.57	8.57	8.57	0.210432	0.309613		1990-04-10	N/A	8.05	8.21	8.29	8.54	8.59	8.58	8.65	8.6	N/A	8.57	1990-04-10	1
1	1	1	1	1	8.58		8.58	8.58	8.58	8.58	8.58	8.58	8.58	8.58	8.58	8.58	8.58	0.222445	0.327811		1990-04-11	N/A	8.03	8.2	8.28	8.56	8.62	8.6	8.63	8.63	N/A	8.58	1990-04-11	1
1	1	1	1	1	8.6		8.6	8.6	8.6	8.6	8.6	8.6	8.6	8.6	8.6	8.6	8.6	0.233316	0.3445		1990-04-12	N/A	8.02	8.2	8.29	8.57	8.63	8.62	8.65	8.64	N/A	8.6	1990-04-12	1
1	1	1	1	1	8.64		8.64	8.64	8.64	8.64	8.64	8.64	8.64	8.64	8.64	8.64	8.64	0.258756	0.382596		1990-04-16	N/A	8.01	8.18	8.29	8.61	8.66	8.65	8.69	8.68	N/A	8.64	1990-04-16	1
1	1	1	1	1	8.74		8.74	8.74	8.74	8.74	8.74	8.74	8.74	8.74	8.74	8.74	8.74	0.285737	0.423178		1990-04-17	N/A	8.03	8.23	8.38	8.7	8.75	8.73	8.78	8.77	N/A	8.74	1990-04-17	1
1	1	1	1	1	8.85		8.85	8.85	8.85	8.85	8.85	8.85	8.85	8.85	8.85	8.85	8.85	0.305971	0.453564		1990-04-18	N/A	8.08	8.3	8.49	8.79	8.84	8.84	8.88	8.86	N/A	8.85	1990-04-18	1
1	1	1	1	1	8.86		8.86	8.86	8.86	8.86	8.86	8.86	8.86	8.86	8.86	8.86	8.86	0.321898	0.477263		1990-04-19	N/A	8.06	8.28	8.46	8.81	8.86	8.84	8.88	8.87	N/A	8.86	1990-04-19	1
1	1	1	1	1	8.93		8.93	8.93	8.93	8.93	8.93	8.93	8.93	8.93	8.93	8.93	8.93	0.392486	0.581154		1990-04-20	N/A	7.95	8.24	8.44	8.82	8.88	8.88	8.95	8.95	N/A	8.93	1990-04-20	1
1	1	1	1	1	8.96		8.96	8.96	8.96	8.96	8.96	8.96	8.96	8.96	8.96	8.96	8.96	0.3776	0.559249		1990-04-23	N/A	8	8.31	8.5	8.87	8.91	8.92	8.97	8.98	N/A	8.96	1990-04-23	1
1	1	1	1	1	8.98		8.98	8.98	8.98	8.98	8.98	8.98	8.98	8.98	8.98	8.98	8.98	0.366445	0.543213		1990-04-24	N/A	8.03	8.36	8.55	8.92	8.98	8.96	9.01	9	N/A	8.98	1990-04-24	1
1	1	1	1	1	8.98		8.98	8.98	8.98	8.98	8.98	8.98	8.98	8.98	8.98	8.98	8.98	0.351167	0.519962		1990-04-25	N/A	8.06	8.4	8.57	8.95	9.01	9	9.03	9.01	N/A	8.98	1990-04-25	1
1	1	1	1	1	9.04		9.04	9.04	9.04	9.04	9.04	9.04	9.04	9.04	9.04	9.04	9.04	0.359621	0.531169		1990-04-26	N/A	8.09	8.45	8.64	9.03	9.11	9.09	9.1	9.07	N/A	9.04	1990-04-26	1
1	1	1	1	1	9.04		9.04	9.04	9.04	9.04	9.04	9.04	9.04	9.04	9.04	9.04	9.04	0.386641	0.572748		1990-04-27	N/A	8.05	8.38	8.57	8.98	9.07	9.06	9.09	9.06	N/A	9.04	1990-04-27	1
1	1	1	1	1	9		9	9	9	9	9	9	9	9	9	9	9	0.352369	0.520865		1990-04-30	N/A	8.07	8.44	8.58	8.96	9.05	9.04	9.06	9.04	N/A	9	1990-04-30	1
1	1	1	1	1	9.04		9.04	9.04	9.04	9.04	9.04	9.04	9.04	9.04	9.04	9.04	9.04	0.338982	0.501159		1990-05-01	N/A	8.19	8.49	8.56	9.02	9.09	9.08	9.09	9.08	N/A	9.04	1990-05-01	1
1	1	1	1	1	9.05		9.05	9.05	9.05	9.05	9.05	9.05	9.05	9.05	9.05	9.05	9.05	0.340721	0.502872		1990-05-02	N/A	8.17	8.49	8.63	9.05	9.11	9.1	9.12	9.09	N/A	9.05	1990-05-02	1
1	1	1	1	1	8.99		8.99	8.99	8.99	8.99	8.99	8.99	8.99	8.99	8.99	8.99	8.99	0.322828	0.476277		1990-05-03	N/A	8.15	8.45	8.62	8.98	9.05	9.04	9.05	9.04	N/A	8.99	1990-05-03	1
1	1	1	1	1	8.83		8.83	8.83	8.83	8.83	8.83	8.83	8.83	8.83	8.83	8.83	8.83	0.326691	0.483611		1990-05-04	N/A	8.02	8.25	8.43	8.7	8.77	8.8	8.83	8.84	N/A	8.83	1990-05-04	1
1	1	1	1	1	8.85		8.85	8.85	8.85	8.85	8.85	8.85	8.85	8.85	8.85	8.85	8.85	0.317333	0.470298		1990-05-07	N/A	8.09	8.26	8.44	8.74	8.82	8.83	8.86	8.87	N/A	8.85	1990-05-07	1
1	1	1	1	1	8.81		8.81	8.81	8.81	8.81	8.81	8.81	8.81	8.81	8.81	8.81	8.81	0.316759	0.468103		1990-05-08	N/A	8.06	8.22	8.4	8.68	8.73	8.79	8.83	8.84	N/A	8.81	1990-05-08	1
1	1	1	1	1	8.9		8.9	8.9	8.9	8.9	8.9	8.9	8.9	8.9	8.9	8.9	8.9	0.3776	0.557602		1990-05-09	N/A	8.01	8.2	8.4	8.75	8.79	8.87	8.92	8.88	N/A	8.9	1990-05-09	1
1	1	1	1	1	8.81		8.81	8.81	8.81	8.81	8.81	8.81	8.81	8.81	8.81	8.81	8.81	0.356128	0.526498		1990-05-10	N/A	7.97	8.15	8.33	8.69	8.73	8.8	8.86	8.82	N/A	8.81	1990-05-10	1
1	1	1	1	1	8.64		8.64	8.64	8.64	8.64	8.64	8.64	8.64	8.64	8.64	8.64	8.64	0.321332	0.475521		1990-05-11	N/A	7.88	8.04	8.21	8.55	8.58	8.64	8.68	8.64	N/A	8.64	1990-05-11	1
1	1	1	1	1	8.58		8.58	8.58	8.58	8.58	8.58	8.58	8.58	8.58	8.58	8.58	8.58	0.286404	0.423273		1990-05-14	N/A	7.89	8.06	8.2	8.51	8.54	8.6	8.64	8.61	N/A	8.58	1990-05-14	1
1	1	1	1	1	8.62		8.62	8.62	8.62	8.62	8.62	8.62	8.62	8.62	8.62	8.62	8.62	0.293877	0.434396		1990-05-15	N/A	7.91	8.09	8.23	8.54	8.58	8.64	8.68	8.65	N/A	8.62	1990-05-15	1
1	1	1	1	1	8.64		8.64	8.64	8.64	8.64	8.64	8.64	8.64	8.64	8.64	8.64	8.64	0.300621	0.443779		1990-05-16	N/A	7.93	8.09	8.23	8.54	8.59	8.66	8.71	8.68	N/A	8.64	1990-05-16	1
1	1	1	1	1	8.65		8.65	8.65	8.65	8.65	8.65	8.65	8.65	8.65	8.65	8.65	8.65	0.302895	0.446565		1990-05-17	N/A	7.93	8.1	8.24	8.56	8.6	8.69	8.73	8.69	N/A	8.65	1990-05-17	1
1	1	1	1	1	8.7		8.7	8.7	8.7	8.7	8.7	8.7	8.7	8.7	8.7	8.7	8.7	0.291859	0.430047		1990-05-18	N/A	8.01	8.16	8.31	8.63	8.69	8.74	8.79	8.75	N/A	8.7	1990-05-18	1
1	1	1	1	1	8.69		8.69	8.69	8.69	8.69	8.69	8.69	8.69	8.69	8.69	8.69	8.69	0.282811	0.416533		1990-05-21	N/A	8.02	8.18	8.3	8.61	8.66	8.74	8.77	8.74	N/A	8.69	1990-05-21	1
1	1	1	1	1	8.61		8.61	8.61	8.61	8.61	8.61	8.61	8.61	8.61	8.61	8.61	8.61	0.258966	0.38113		1990-05-22	N/A	7.99	8.18	8.22	8.54	8.58	8.66	8.69	8.65	N/A	8.61	1990-05-22	1
1	1	1	1	1	8.59		8.59	8.59	8.59	8.59	8.59	8.59	8.59	8.59	8.59	8.59	8.59	0.2831	0.418473		1990-05-23	N/A	7.91	8.11	8.17	8.51	8.55	8.61	8.65	8.61	N/A	8.59	1990-05-23	1
1	1	1	1	1	8.6		8.6	8.6	8.6	8.6	8.6	8.6	8.6	8.6	8.6	8.6	8.6	0.280422	0.413884		1990-05-24	N/A	7.95	8.12	8.16	8.5	8.54	8.58	8.66	8.63	N/A	8.6	1990-05-24	1
1	1	1	1	1	8.67		8.67	8.67	8.67	8.67	8.67	8.67	8.67	8.67	8.67	8.67	8.67	0.286182	0.42164		1990-05-25	N/A	8.01	8.18	8.23	8.53	8.59	8.61	8.71	8.69	N/A	8.67	1990-05-25	1
1	1	1	1	1	8.64		8.64	8.64	8.64	8.64	8.64	8.64	8.64	8.64	8.64	8.64	8.64	0.269208	0.396938		1990-05-29	N/A	8.02	8.17	8.23	8.52	8.57	8.59	8.68	8.66	N/A	8.64	1990-05-29	1
1	1	1	1	1	8.6		8.6	8.6	8.6	8.6	8.6	8.6	8.6	8.6	8.6	8.6	8.6	0.264145	0.389718		1990-05-30	N/A	8.03	8.09	8.2	8.48	8.54	8.56	8.65	8.62	N/A	8.6	1990-05-30	1
1	1	1	1	1	8.58		8.58	8.58	8.58	8.58	8.58	8.58	8.58	8.58	8.58	8.58	8.58	0.248523	0.366742		1990-05-31	N/A	8.01	8.12	8.22	8.5	8.53	8.56	8.64	8.6	N/A	8.58	1990-05-31	1
1	1	1	1	1	8.43		8.43	8.43	8.43	8.43	8.43	8.43	8.43	8.43	8.43	8.43	8.43	0.228135	0.335678		1990-06-01	N/A	7.94	8.01	8.06	8.33	8.36	8.38	8.47	8.44	N/A	8.43	1990-06-01	1
1	1	1	1	1	8.43		8.43	8.43	8.43	8.43	8.43	8.43	8.43	8.43	8.43	8.43	8.43	0.220145	0.324006		1990-06-04	N/A	7.96	8.03	8.07	8.31	8.36	8.39	8.47	8.44	N/A	8.43	1990-06-04	1
1	1	1	1	1	8.46		8.46	8.46	8.46	8.46	8.46	8.46	8.46	8.46	8.46	8.46	8.46	0.232926	0.342403		1990-06-05	N/A	7.96	8.03	8.09	8.34	8.38	8.42	8.51	8.47	N/A	8.46	1990-06-05	1
1	1	1	1	1	8.44		8.44	8.44	8.44	8.44	8.44	8.44	8.44	8.44	8.44	8.44	8.44	0.222853	0.32842		1990-06-06	N/A	7.96	8.02	8.09	8.34	8.4	8.43	8.51	8.46	N/A	8.44	1990-06-06	1
1	1	1	1	1	8.43		8.43	8.43	8.43	8.43	8.43	8.43	8.43	8.43	8.43	8.43	8.43	0.222057	0.327109		1990-06-07	N/A	7.96	8.01	8.07	8.34	8.38	8.41	8.49	8.46	N/A	8.43	1990-06-07	1
1	1	1	1	1	8.44		8.44	8.44	8.44	8.44	8.44	8.44	8.44	8.44	8.44	8.44	8.44	0.224985	0.330908		1990-06-08	N/A	7.96	8.03	8.07	8.33	8.38	8.42	8.51	8.46	N/A	8.44	1990-06-08	1
1	1	1	1	1	8.45		8.45	8.45	8.45	8.45	8.45	8.45	8.45	8.45	8.45	8.45	8.45	0.21352	0.314229		1990-06-11	N/A	7.99	8.07	8.09	8.36	8.41	8.43	8.52	8.48	N/A	8.45	1990-06-11	1
1	1	1	1	1	8.45		8.45	8.45	8.45	8.45	8.45	8.45	8.45	8.45	8.45	8.45	8.45	0.216606	0.319155		1990-06-12	N/A	7.99	8.05	8.09	8.36	8.42	8.44	8.52	8.48	N/A	8.45	1990-06-12	1
1	1	1	1	1	8.39		8.39	8.39	8.39	8.39	8.39	8.39	8.39	8.39	8.39	8.39	8.39	0.219917	0.323388		1990-06-13	N/A	7.93	7.99	8.02	8.27	8.32	8.35	8.44	8.4	N/A	8.39	1990-06-13	1
1	1	1	1	1	8.36		8.36	8.36	8.36	8.36	8.36	8.36	8.36	8.36	8.36	8.36	8.36	0.211359	0.310483		1990-06-14	N/A	7.92	7.98	8	8.24	8.29	8.32	8.41	8.38	N/A	8.36	1990-06-14	1
1	1	1	1	1	8.43		8.43	8.43	8.43	8.43	8.43	8.43	8.43	8.43	8.43	8.43	8.43	0.22267	0.327689		1990-06-15	N/A	7.95	8.04	8.05	8.33	8.37	8.41	8.49	8.46	N/A	8.43	1990-06-15	1
1	1	1	1	1	8.47		8.47	8.47	8.47	8.47	8.47	8.47	8.47	8.47	8.47	8.47	8.47	0.234152	0.345167		1990-06-18	N/A	7.93	8.06	8.11	8.39	8.42	8.45	8.53	8.5	N/A	8.47	1990-06-18	1
1	1	1	1	1	8.48		8.48	8.48	8.48	8.48	8.48	8.48	8.48	8.48	8.48	8.48	8.48	0.217235	0.320094		33043	N/A	8	8.07	8.15	8.41	8.45	8.47	8.55	8.51	N/A	8.48	1990-06-19	1
1	1	1	1	1	8.52		8.52	8.52	8.52	8.52	8.52	8.52	8.52	8.52	8.52	8.52	8.52	0.231556	0.340676		33044	N/A	8.03	8.07	8.16	8.43	8.46	8.51	8.59	8.55	N/A	8.52	1990-06-20	1
1	1	1	1	1	8.5		8.5	8.5	8.5	8.5	8.5	8.5	8.5	8.5	8.5	8.5	8.5	0.222445	0.327109		33045	N/A	8.03	8.08	8.14	8.41	8.44	8.48	8.57	8.52	N/A	8.5	1990-06-21	1
1	1	1	1	1	8.49		8.49	8.49	8.49	8.49	8.49	8.49	8.49	8.49	8.49	8.49	8.49	0.223525	0.328968		33046	N/A	8.04	8.05	8.12	8.4	8.43	8.46	8.55	8.51	N/A	8.49	1990-06-22	1
1	1	1	1	1	8.56		8.56	8.56	8.56	8.56	8.56	8.56	8.56	8.56	8.56	8.56	8.56	0.241454	0.354965		33049	N/A	8.05	8.09	8.19	8.45	8.48	8.53	8.62	8.58	N/A	8.56	1990-06-25	1
1	1	1	1	1	8.53		8.53	8.53	8.53	8.53	8.53	8.53	8.53	8.53	8.53	8.53	8.53	0.216627	0.31928		33050	N/A	8.07	8.12	8.19	8.41	8.49	8.51	8.59	8.56	N/A	8.53	1990-06-26	1
1	1	1	1	1	8.49		8.49	8.49	8.49	8.49	8.49	8.49	8.49	8.49	8.49	8.49	8.49	0.211574	0.310677		33051	N/A	8.05	8.1	8.14	8.37	8.43	8.47	8.56	8.52	N/A	8.49	1990-06-27	1
1	1	1	1	1	8.45		8.45	8.45	8.45	8.45	8.45	8.45	8.45	8.45	8.45	8.45	8.45	0.224601	0.329515		33052	N/A	8	8.03	8.07	8.31	8.37	8.41	8.51	8.47	N/A	8.45	1990-06-28	1
1	1	1	1	1	8.41		8.41	8.41	8.41	8.41	8.41	8.41	8.41	8.41	8.41	8.41	8.41	0.211767	0.309419		33053	N/A	8	8.02	8.05	8.24	8.32	8.35	8.46	8.43	N/A	8.41	1990-06-29	1
1	1	1	1	1	8.41		8.41	8.41	8.41	8.41	8.41	8.41	8.41	8.41	8.41	8.41	8.41	0.207846	0.303513		33056	N/A	8	8.03	8.06	8.25	8.32	8.35	8.46	8.43	N/A	8.41	1990-07-02	1
1	1	1	1	1	8.4		8.4	8.4	8.4	8.4	8.4	8.4	8.4	8.4	8.4	8.4	8.4	0.227256	0.330363		33057	N/A	7.96	8	8.01	8.2	8.28	8.32	8.44	8.4	N/A	8.4	1990-07-03	1
1	1	1	1	1	8.42		8.42	8.42	8.42	8.42	8.42	8.42	8.42	8.42	8.42	8.42	8.42	0.245505	0.358776		33059	N/A	7.92	7.98	8.02	8.22	8.31	8.34	8.45	8.42	N/A	8.42	1990-07-05	1
1	1	1	1	1	8.51		8.51	8.51	8.51	8.51	8.51	8.51	8.51	8.51	8.51	8.51	8.51	0.238423	0.348683		33060	N/A	8.01	8.08	8.14	8.32	8.41	8.44	8.56	8.51	N/A	8.51	1990-07-06	1
1	1	1	1	1	8.55		8.55	8.55	8.55	8.55	8.55	8.55	8.55	8.55	8.55	8.55	8.55	0.229228	0.335678		33063	N/A	8.06	8.14	8.19	8.39	8.46	8.49	8.6	8.57	N/A	8.55	1990-07-09	1
1	1	1	1	1	8.56		8.56	8.56	8.56	8.56	8.56	8.56	8.56	8.56	8.56	8.56	8.56	0.224196	0.328725		33064	N/A	8.07	8.17	8.21	8.4	8.48	8.5	8.61	8.57	N/A	8.56	1990-07-10	1
1	1	1	1	1	8.56		8.56	8.56	8.56	8.56	8.56	8.56	8.56	8.56	8.56	8.56	8.56	0.236182	0.34589		33065	N/A	8.05	8.15	8.18	8.4	8.46	8.49	8.58	8.57	N/A	8.56	1990-07-11	1
1	1	1	1	1	8.5		8.5	8.5	8.5	8.5	8.5	8.5	8.5	8.5	8.5	8.5	8.5	0.301134	0.434603		33066	N/A	7.94	7.98	7.98	8.2	8.31	8.37	8.49	8.5	N/A	8.5	1990-07-12	1
1	1	1	1	1	8.46		8.46	8.46	8.46	8.46	8.46	8.46	8.46	8.46	8.46	8.46	8.46	0.326566	0.470829		33067	N/A	7.85	7.91	7.89	8.13	8.25	8.32	8.43	8.45	N/A	8.46	1990-07-13	1
1	1	1	1	1	8.46		8.46	8.46	8.46	8.46	8.46	8.46	8.46	8.46	8.46	8.46	8.46	0.322955	0.46551		33070	N/A	7.86	7.91	7.89	8.15	8.26	8.31	8.43	8.44	N/A	8.46	1990-07-16	1
1	1	1	1	1	8.46		8.46	8.46	8.46	8.46	8.46	8.46	8.46	8.46	8.46	8.46	8.46	0.327025	0.468167		33071	N/A	7.87	7.91	7.88	8.13	8.23	8.3	8.42	8.44	N/A	8.46	1990-07-17	1
1	1	1	1	1	8.55		8.55	8.55	8.55	8.55	8.55	8.55	8.55	8.55	8.55	8.55	8.55	0.404441	0.574491		33072	N/A	7.8	7.88	7.87	8.13	8.24	8.34	8.47	8.5	N/A	8.55	1990-07-18	1
1	1	1	1	1	8.56		8.56	8.56	8.56	8.56	8.56	8.56	8.56	8.56	8.56	8.56	8.56	0.418916	0.592959		33073	N/A	7.79	7.85	7.87	8.13	8.23	8.33	8.47	8.51	N/A	8.56	1990-07-19	1
1	1	1	1	1	8.54		8.54	8.54	8.54	8.54	8.54	8.54	8.54	8.54	8.54	8.54	8.54	0.422869	0.592301		33074	N/A	7.79	7.84	7.84	8.08	8.18	8.28	8.43	8.48	N/A	8.54	1990-07-20	1
1	1	1	1	1	8.54		8.54	8.54	8.54	8.54	8.54	8.54	8.54	8.54	8.54	8.54	8.54	0.449939	0.633514		33077	N/A	7.73	7.78	7.81	8.05	8.17	8.28	8.43	8.48	N/A	8.54	1990-07-23	1
1	1	1	1	1	8.59		8.59	8.59	8.59	8.59	8.59	8.59	8.59	8.59	8.59	8.59	8.59	0.443427	0.628331		33078	N/A	7.78	7.82	7.88	8.12	8.25	8.35	8.48	8.53	N/A	8.59	1990-07-24	1
1	1	1	1	1	8.55		8.55	8.55	8.55	8.55	8.55	8.55	8.55	8.55	8.55	8.55	8.55	0.414542	0.586669		33079	N/A	7.81	7.85	7.87	8.08	8.24	8.31	8.44	8.49	N/A	8.55	1990-07-25	1
1	1	1	1	1	8.54		8.54	8.54	8.54	8.54	8.54	8.54	8.54	8.54	8.54	8.54	8.54	0.397858	0.563507		33080	N/A	7.83	7.86	7.9	8.08	8.24	8.31	8.45	8.49	N/A	8.54	1990-07-26	1
1	1	1	1	1	8.48		8.48	8.48	8.48	8.48	8.48	8.48	8.48	8.48	8.48	8.48	8.48	0.41041	0.578446		33081	N/A	7.77	7.79	7.8	8	8.15	8.25	8.36	8.42	N/A	8.48	1990-07-27	1
1	1	1	1	1	8.4		8.4	8.4	8.4	8.4	8.4	8.4	8.4	8.4	8.4	8.4	8.4	0.395739	0.550382		33084	N/A	7.74	7.74	7.75	7.93	8.05	8.14	8.28	8.34	N/A	8.4	1990-07-30	1
1	1	1	1	1	8.42		8.42	8.42	8.42	8.42	8.42	8.42	8.42	8.42	8.42	8.42	8.42	0.421491	0.583524		33085	N/A	7.74	7.72	7.72	7.91	8.04	8.13	8.28	8.36	N/A	8.42	1990-07-31	1
1	1	1	1	1	8.36		8.36	8.36	8.36	8.36	8.36	8.36	8.36	8.36	8.36	8.36	8.36	0.432088	0.595517		33086	N/A	7.67	7.65	7.63	7.85	7.96	8.06	8.2	8.29	N/A	8.36	1990-08-01	1
1	1	1	1	1	8.46		8.46	8.46	8.46	8.46	8.46	8.46	8.46	8.46	8.46	8.46	8.46	0.47028	0.651721		33087	N/A	7.68	7.67	7.7	7.9	8.03	8.15	8.3	8.41	N/A	8.46	1990-08-02	1
1	1	1	1	1	8.55		8.55	8.55	8.55	8.55	8.55	8.55	8.55	8.55	8.55	8.55	8.55	0.618238	0.850717		33088	N/A	7.52	7.55	7.56	7.79	7.98	8.11	8.32	8.43	N/A	8.55	1990-08-03	1
1	1	1	1	1	8.82		8.82	8.82	8.82	8.82	8.82	8.82	8.82	8.82	8.82	8.82	8.82	0.755814	1.04056		33091	N/A	7.54	7.59	7.63	7.9	8.11	8.29	8.55	8.71	N/A	8.82	1990-08-06	1
1	1	1	1	1	8.86		8.86	8.86	8.86	8.86	8.86	8.86	8.86	8.86	8.86	8.86	8.86	0.703614	0.974053		33092	N/A	7.61	7.73	7.75	8.04	8.19	8.41	8.65	8.78	N/A	8.86	1990-08-07	1
1	1	1	1	1	8.87		8.87	8.87	8.87	8.87	8.87	8.87	8.87	8.87	8.87	8.87	8.87	0.719305	0.997697		33093	N/A	7.62	7.69	7.73	8.02	8.19	8.43	8.65	8.77	N/A	8.87	1990-08-08	1
1	1	1	1	1	8.75		8.75	8.75	8.75	8.75	8.75	8.75	8.75	8.75	8.75	8.75	8.75	0.643789	0.888842		33094	N/A	7.66	7.69	7.72	7.99	8.13	8.33	8.55	8.66	N/A	8.75	1990-08-09	1
1	1	1	1	1	8.79		8.79	8.79	8.79	8.79	8.79	8.79	8.79	8.79	8.79	8.79	8.79	0.68843	0.950221		33095	N/A	7.64	7.68	7.67	7.95	8.12	8.35	8.58	8.68	N/A	8.79	1990-08-10	1
1	1	1	1	1	8.83		8.83	8.83	8.83	8.83	8.83	8.83	8.83	8.83	8.83	8.83	8.83	0.718945	0.982884		33098	N/A	7.66	7.7	7.65	7.94	8.08	8.36	8.59	8.71	N/A	8.83	1990-08-13	1
1	1	1	1	1	8.78		8.78	8.78	8.78	8.78	8.78	8.78	8.78	8.78	8.78	8.78	8.78	0.672729	0.919489		33099	N/A	7.68	7.72	7.69	7.94	8.08	8.34	8.55	8.66	N/A	8.78	1990-08-14	1
1	1	1	1	1	8.76		8.76	8.76	8.76	8.76	8.76	8.76	8.76	8.76	8.76	8.76	8.76	0.655979	0.897028		33100	N/A	7.7	7.73	7.68	7.94	8.08	8.33	8.54	8.64	N/A	8.76	1990-08-15	1
1	1	1	1	1	8.91		8.91	8.91	8.91	8.91	8.91	8.91	8.91	8.91	8.91	8.91	8.91	0.687902	0.942465		33101	N/A	7.73	7.83	7.81	8.09	8.23	8.45	8.65	8.76	N/A	8.91	1990-08-16	1
1	1	1	1	1	8.94		8.94	8.94	8.94	8.94	8.94	8.94	8.94	8.94	8.94	8.94	8.94	0.705169	0.972759		33102	N/A	7.72	7.82	7.8	8.11	8.27	8.49	8.68	8.8	N/A	8.94	1990-08-17	1
1	1	1	1	1	8.92		8.92	8.92	8.92	8.92	8.92	8.92	8.92	8.92	8.92	8.92	8.92	0.667723	0.922811		33105	N/A	7.77	7.85	7.84	8.13	8.28	8.5	8.7	8.81	N/A	8.92	1990-08-20	1
1	1	1	1	1	8.94		8.94	8.94	8.94	8.94	8.94	8.94	8.94	8.94	8.94	8.94	8.94	0.645164	0.894405		33106	N/A	7.83	7.88	7.9	8.19	8.32	8.56	8.74	8.84	N/A	8.94	1990-08-21	1
1	1	1	1	1	9.03		9.03	9.03	9.03	9.03	9.03	9.03	9.03	9.03	9.03	9.03	9.03	0.679953	0.941042		33107	N/A	7.85	7.91	7.94	8.26	8.38	8.62	8.8	8.91	N/A	9.03	1990-08-22	1
1	1	1	1	1	9.11		9.11	9.11	9.11	9.11	9.11	9.11	9.11	9.11	9.11	9.11	9.11	0.729234	1.01581		33108	N/A	7.79	7.91	7.99	8.26	8.44	8.69	8.88	9	N/A	9.11	1990-08-23	1
1	1	1	1	1	9.17		9.17	9.17	9.17	9.17	9.17	9.17	9.17	9.17	9.17	9.17	9.17	0.773904	1.08587		33109	N/A	7.74	7.88	7.96	8.32	8.5	8.75	8.94	9.05	N/A	9.17	1990-08-24	1
1	1	1	1	1	9.02		9.02	9.02	9.02	9.02	9.02	9.02	9.02	9.02	9.02	9.02	9.02	0.703291	0.974423		33112	N/A	7.78	7.89	7.89	8.21	8.34	8.61	8.8	8.9	N/A	9.02	1990-08-27	1
1	1	1	1	1	9.07		9.07	9.07	9.07	9.07	9.07	9.07	9.07	9.07	9.07	9.07	9.07	0.730249	1.02158		33113	N/A	7.73	7.87	7.94	8.23	8.42	8.67	8.85	8.94	N/A	9.07	1990-08-28	1
1	1	1	1	1	8.95		8.95	8.95	8.95	8.95	8.95	8.95	8.95	8.95	8.95	8.95	8.95	0.687585	0.956985		33114	N/A	7.72	7.84	7.85	8.16	8.33	8.52	8.75	8.84	N/A	8.95	1990-08-29	1
1	1	1	1	1	8.98		8.98	8.98	8.98	8.98	8.98	8.98	8.98	8.98	8.98	8.98	8.98	0.72688	1.00925		33115	N/A	7.7	7.8	7.83	8.12	8.31	8.52	8.77	8.86	N/A	8.98	1990-08-30	1
1	1	1	1	1	8.99		8.99	8.99	8.99	8.99	8.99	8.99	8.99	8.99	8.99	8.99	8.99	0.775166	1.07437		33116	N/A	7.63	7.74	7.76	8.07	8.26	8.5	8.77	8.86	N/A	8.99	1990-08-31	1
1	1	1	1	1	9.03		9.03	9.03	9.03	9.03	9.03	9.03	9.03	9.03	9.03	9.03	9.03	0.79483	1.10154		33120	N/A	7.64	7.75	7.76	8.09	8.28	8.53	8.8	8.9	N/A	9.03	1990-09-04	1
1	1	1	1	1	8.98		8.98	8.98	8.98	8.98	8.98	8.98	8.98	8.98	8.98	8.98	8.98	0.786297	1.08729		33121	N/A	7.61	7.71	7.74	8.04	8.23	8.47	8.75	8.86	N/A	8.98	1990-09-05	1
1	1	1	1	1	8.96		8.96	8.96	8.96	8.96	8.96	8.96	8.96	8.96	8.96	8.96	8.96	0.767138	1.06363		33122	N/A	7.62	7.71	7.74	8.06	8.24	8.47	8.75	8.84	N/A	8.96	1990-09-06	1
1	1	1	1	1	8.92		8.92	8.92	8.92	8.92	8.92	8.92	8.92	8.92	8.92	8.92	8.92	0.74062	1.02671		33123	N/A	7.63	7.73	7.73	8.04	8.22	8.45	8.72	8.81	N/A	8.92	1990-09-07	1
1	1	1	1	1	8.98		8.98	8.98	8.98	8.98	8.98	8.98	8.98	8.98	8.98	8.98	8.98	0.751072	1.03794		33126	N/A	7.68	7.76	7.79	8.09	8.26	8.5	8.75	8.85	N/A	8.98	1990-09-10	1
1	1	1	1	1	8.96		8.96	8.96	8.96	8.96	8.96	8.96	8.96	8.96	8.96	8.96	8.96	0.735002	1.01648		33127	N/A	7.67	7.76	7.81	8.1	8.27	8.48	8.73	8.83	N/A	8.96	1990-09-11	1
1	1	1	1	1	8.96		8.96	8.96	8.96	8.96	8.96	8.96	8.96	8.96	8.96	8.96	8.96	0.770454	1.06792		33128	N/A	7.61	7.7	7.75	8.05	8.26	8.45	8.72	8.82	N/A	8.96	1990-09-12	1
1	1	1	1	1	8.96		8.96	8.96	8.96	8.96	8.96	8.96	8.96	8.96	8.96	8.96	8.96	0.799346	1.103		33129	N/A	7.59	7.65	7.7	8.01	8.19	8.44	8.71	8.82	N/A	8.96	1990-09-13	1
1	1	1	1	1	9.01		9.01	9.01	9.01	9.01	9.01	9.01	9.01	9.01	9.01	9.01	9.01	0.826922	1.14414		33130	N/A	7.59	7.63	7.72	8.03	8.23	8.48	8.75	8.87	N/A	9.01	1990-09-14	1
1	1	1	1	1	9.06		9.06	9.06	9.06	9.06	9.06	9.06	9.06	9.06	9.06	9.06	9.06	0.851165	1.1706		33133	N/A	7.61	7.66	7.73	8.05	8.23	8.49	8.78	8.9	N/A	9.06	1990-09-17	1
1	1	1	1	1	9.05		9.05	9.05	9.05	9.05	9.05	9.05	9.05	9.05	9.05	9.05	9.05	0.847628	1.1652		33134	N/A	7.61	7.66	7.73	8.03	8.22	8.48	8.77	8.9	N/A	9.05	1990-09-18	1
1	1	1	1	1	9.02		9.02	9.02	9.02	9.02	9.02	9.02	9.02	9.02	9.02	9.02	9.02	0.798607	1.1018		33135	N/A	7.64	7.69	7.79	8.08	8.24	8.51	8.78	8.88	N/A	9.02	1990-09-19	1
1	1	1	1	1	9.05		9.05	9.05	9.05	9.05	9.05	9.05	9.05	9.05	9.05	9.05	9.05	0.806778	1.11345		33136	N/A	7.63	7.73	7.81	8.1	8.27	8.53	8.8	8.91	N/A	9.05	1990-09-20	1
1	1	1	1	1	9.13		9.13	9.13	9.13	9.13	9.13	9.13	9.13	9.13	9.13	9.13	9.13	0.868075	1.20225		33137	N/A	7.6	7.71	7.77	8.12	8.31	8.58	8.87	8.99	N/A	9.13	1990-09-21	1
1	1	1	1	1	9.18		9.18	9.18	9.18	9.18	9.18	9.18	9.18	9.18	9.18	9.18	9.18	0.864954	1.2009		33140	N/A	7.63	7.75	7.83	8.21	8.38	8.64	8.92	9.04	N/A	9.18	1990-09-24	1
1	1	1	1	1	9.15		9.15	9.15	9.15	9.15	9.15	9.15	9.15	9.15	9.15	9.15	9.15	0.844151	1.17825		33141	N/A	7.59	7.78	7.85	8.18	8.4	8.64	8.91	9.02	N/A	9.15	1990-09-25	1
1	1	1	1	1	9.14		9.14	9.14	9.14	9.14	9.14	9.14	9.14	9.14	9.14	9.14	9.14	0.85228	1.18956		33142	N/A	7.57	7.74	7.84	8.16	8.38	8.63	8.9	9	N/A	9.14	1990-09-26	1
1	1	1	1	1	9.05		9.05	9.05	9.05	9.05	9.05	9.05	9.05	9.05	9.05	9.05	9.05	0.868117	1.21152		33143	N/A	7.47	7.61	7.72	8.05	8.28	8.52	8.81	8.91	N/A	9.05	1990-09-27	1
1	1	1	1	1	8.96		8.96	8.96	8.96	8.96	8.96	8.96	8.96	8.96	8.96	8.96	8.96	0.849947	1.18668		33144	N/A	7.37	7.54	7.69	8.02	8.19	8.47	8.73	8.82	N/A	8.96	1990-09-28	1
1	1	1	1	1	8.84		8.84	8.84	8.84	8.84	8.84	8.84	8.84	8.84	8.84	8.84	8.84	0.794418	1.10915		33147	N/A	7.37	7.53	7.63	7.94	8.12	8.38	8.63	8.71	N/A	8.84	1990-10-01	1
1	1	1	1	1	8.84		8.84	8.84	8.84	8.84	8.84	8.84	8.84	8.84	8.84	8.84	8.84	0.794075	1.10166		33148	N/A	7.41	7.55	7.61	7.92	8.1	8.35	8.6	8.69	N/A	8.84	1990-10-02	1
1	1	1	1	1	8.85		8.85	8.85	8.85	8.85	8.85	8.85	8.85	8.85	8.85	8.85	8.85	0.820903	1.13865		33149	N/A	7.38	7.53	7.57	7.88	8.09	8.33	8.6	8.71	N/A	8.85	1990-10-03	1
1	1	1	1	1	8.81		8.81	8.81	8.81	8.81	8.81	8.81	8.81	8.81	8.81	8.81	8.81	0.80702	1.11701		33150	N/A	7.36	7.51	7.56	7.87	8.04	8.3	8.58	8.67	N/A	8.81	1990-10-04	1
1	1	1	1	1	8.79		8.79	8.79	8.79	8.79	8.79	8.79	8.79	8.79	8.79	8.79	8.79	0.837111	1.16032		33151	N/A	7.27	7.44	7.51	7.81	8	8.27	8.54	8.65	N/A	8.79	1990-10-05	1
1	1	1	1	1	8.98		8.98	8.98	8.98	8.98	8.98	8.98	8.98	8.98	8.98	8.98	8.98	0.873879	1.20848		33155	N/A	7.41	7.58	7.64	7.94	8.14	8.43	8.72	8.83	N/A	8.98	1990-10-09	1
1	1	1	1	1	9.03		9.03	9.03	9.03	9.03	9.03	9.03	9.03	9.03	9.03	9.03	9.03	0.887591	1.2318		33156	N/A	7.44	7.6	7.64	7.99	8.19	8.49	8.78	8.89	N/A	9.03	1990-10-10	1
1	1	1	1	1	9.08		9.08	9.08	9.08	9.08	9.08	9.08	9.08	9.08	9.08	9.08	9.08	0.953963	1.32938		33157	N/A	7.35	7.51	7.6	7.99	8.22	8.51	8.79	8.92	N/A	9.08	1990-10-11	1
1	1	1	1	1	8.98		8.98	8.98	8.98	8.98	8.98	8.98	8.98	8.98	8.98	8.98	8.98	0.894397	1.24398		33158	N/A	7.37	7.52	7.59	7.94	8.16	8.44	8.7	8.84	N/A	8.98	1990-10-12	1
1	1	1	1	1	8.95		8.95	8.95	8.95	8.95	8.95	8.95	8.95	8.95	8.95	8.95	8.95	0.871743	1.20602		33161	N/A	7.4	7.56	7.58	7.92	8.13	8.39	8.67	8.8	N/A	8.95	1990-10-15	1
1	1	1	1	1	8.94		8.94	8.94	8.94	8.94	8.94	8.94	8.94	8.94	8.94	8.94	8.94	0.863481	1.19517		33162	N/A	7.39	7.58	7.58	7.92	8.13	8.39	8.66	8.79	N/A	8.94	1990-10-16	1
1	1	1	1	1	8.89		8.89	8.89	8.89	8.89	8.89	8.89	8.89	8.89	8.89	8.89	8.89	0.817162	1.13115		33163	N/A	7.44	7.59	7.6	7.92	8.12	8.37	8.63	8.76	N/A	8.89	1990-10-17	1
1	1	1	1	1	8.85		8.85	8.85	8.85	8.85	8.85	8.85	8.85	8.85	8.85	8.85	8.85	0.793164	1.09171		33164	N/A	7.49	7.57	7.59	7.91	8.08	8.32	8.59	8.71	N/A	8.85	1990-10-18	1
1	1	1	1	1	8.75		8.75	8.75	8.75	8.75	8.75	8.75	8.75	8.75	8.75	8.75	8.75	0.747505	1.02752		33165	N/A	7.48	7.56	7.55	7.85	8.02	8.25	8.49	8.62	N/A	8.75	1990-10-19	1
1	1	1	1	1	8.76		8.76	8.76	8.76	8.76	8.76	8.76	8.76	8.76	8.76	8.76	8.76	0.759587	1.04587		33168	N/A	7.47	7.55	7.53	7.85	8.03	8.25	8.5	8.63	N/A	8.76	1990-10-22	1
1	1	1	1	1	8.79		8.79	8.79	8.79	8.79	8.79	8.79	8.79	8.79	8.79	8.79	8.79	0.792711	1.08615		33169	N/A	7.45	7.53	7.52	7.84	8	8.25	8.51	8.65	N/A	8.79	1990-10-23	1
1	1	1	1	1	8.79		8.79	8.79	8.79	8.79	8.79	8.79	8.79	8.79	8.79	8.79	8.79	0.790092	1.08369		33170	N/A	7.46	7.53	7.52	7.84	8	8.26	8.52	8.66	N/A	8.79	1990-10-24	1
1	1	1	1	1	8.74		8.74	8.74	8.74	8.74	8.74	8.74	8.74	8.74	8.74	8.74	8.74	0.784214	1.07739		33171	N/A	7.41	7.51	7.46	7.8	7.97	8.21	8.47	8.62	N/A	8.74	1990-10-25	1
1	1	1	1	1	8.76		8.76	8.76	8.76	8.76	8.76	8.76	8.76	8.76	8.76	8.76	8.76	0.813969	1.1214		33172	N/A	7.36	7.45	7.46	7.8	7.97	8.23	8.48	8.63	N/A	8.76	1990-10-26	1
1	1	1	1	1	8.84		8.84	8.84	8.84	8.84	8.84	8.84	8.84	8.84	8.84	8.84	8.84	0.852515	1.17228		33175	N/A	7.38	7.48	7.48	7.82	8.01	8.27	8.54	8.7	N/A	8.84	1990-10-29	1
1	1	1	1	1	8.83		8.83	8.83	8.83	8.83	8.83	8.83	8.83	8.83	8.83	8.83	8.83	0.843505	1.16431		33176	N/A	7.37	7.51	7.48	7.79	8.02	8.28	8.56	8.7	N/A	8.83	1990-10-30	1
1	1	1	1	1	8.78		8.78	8.78	8.78	8.78	8.78	8.78	8.78	8.78	8.78	8.78	8.78	0.836747	1.154		33177	N/A	7.34	7.46	7.43	7.77	7.97	8.24	8.5	8.65	N/A	8.78	1990-10-31	1
1	1	1	1	1	8.7		8.7	8.7	8.7	8.7	8.7	8.7	8.7	8.7	8.7	8.7	8.7	0.84066	1.15789		33178	N/A	7.28	7.38	7.32	7.68	7.88	8.15	8.42	8.57	N/A	8.7	1990-11-01	1
1	1	1	1	1	8.7		8.7	8.7	8.7	8.7	8.7	8.7	8.7	8.7	8.7	8.7	8.7	0.828158	1.13886		33179	N/A	7.31	7.4	7.35	7.68	7.88	8.16	8.42	8.57	N/A	8.7	1990-11-02	1
1	1	1	1	1	8.63		8.63	8.63	8.63	8.63	8.63	8.63	8.63	8.63	8.63	8.63	8.63	0.795716	1.0927		33182	N/A	7.31	7.39	7.33	7.63	7.84	8.1	8.36	8.5	N/A	8.63	1990-11-05	1
1	1	1	1	1	8.64		8.64	8.64	8.64	8.64	8.64	8.64	8.64	8.64	8.64	8.64	8.64	0.794847	1.08405		33183	N/A	7.31	7.42	7.36	7.65	7.8	8.11	8.37	8.52	N/A	8.64	1990-11-06	1
1	1	1	1	1	8.71		8.71	8.71	8.71	8.71	8.71	8.71	8.71	8.71	8.71	8.71	8.71	0.834577	1.13795		33184	N/A	7.32	7.43	7.36	7.67	7.82	8.16	8.44	8.57	N/A	8.71	1990-11-07	1
1	1	1	1	1	8.73		8.73	8.73	8.73	8.73	8.73	8.73	8.73	8.73	8.73	8.73	8.73	0.85117	1.16036		33185	N/A	7.32	7.42	7.35	7.67	7.82	8.18	8.44	8.58	N/A	8.73	1990-11-08	1
1	1	1	1	1	8.63		8.63	8.63	8.63	8.63	8.63	8.63	8.63	8.63	8.63	8.63	8.63	0.812706	1.10613		33186	N/A	7.27	7.39	7.33	7.61	7.75	8.1	8.36	8.49	N/A	8.63	1990-11-09	1
1	1	1	1	1	8.52		8.52	8.52	8.52	8.52	8.52	8.52	8.52	8.52	8.52	8.52	8.52	0.750563	1.01727		33190	N/A	7.27	7.39	7.3	7.6	7.7	8.01	8.26	8.37	N/A	8.52	1990-11-13	1
1	1	1	1	1	8.51		8.51	8.51	8.51	8.51	8.51	8.51	8.51	8.51	8.51	8.51	8.51	0.741135	1.00458		33191	N/A	7.3	7.38	7.31	7.58	7.7	8.01	8.25	8.36	N/A	8.51	1990-11-14	1
1	1	1	1	1	8.53		8.53	8.53	8.53	8.53	8.53	8.53	8.53	8.53	8.53	8.53	8.53	0.745368	1.00698		33192	N/A	7.32	7.4	7.32	7.6	7.71	8.01	8.26	8.37	N/A	8.53	1990-11-15	1
1	1	1	1	1	8.46		8.46	8.46	8.46	8.46	8.46	8.46	8.46	8.46	8.46	8.46	8.46	0.715872	0.969649		33193	N/A	7.31	7.37	7.27	7.58	7.69	7.96	8.2	8.3	N/A	8.46	1990-11-16	1
1	1	1	1	1	8.51		8.51	8.51	8.51	8.51	8.51	8.51	8.51	8.51	8.51	8.51	8.51	0.719861	0.973992		33196	N/A	7.33	7.43	7.33	7.62	7.73	8.01	8.24	8.35	N/A	8.51	1990-11-19	1
1	1	1	1	1	8.47		8.47	8.47	8.47	8.47	8.47	8.47	8.47	8.47	8.47	8.47	8.47	0.695453	0.940681		33197	N/A	7.32	7.42	7.34	7.62	7.72	7.98	8.21	8.31	N/A	8.47	1990-11-20	1
1	1	1	1	1	8.44		8.44	8.44	8.44	8.44	8.44	8.44	8.44	8.44	8.44	8.44	8.44	0.718863	0.969361		33198	N/A	7.27	7.37	7.26	7.55	7.66	7.92	8.16	8.27	N/A	8.44	1990-11-21	1
1	1	1	1	1	8.44		8.44	8.44	8.44	8.44	8.44	8.44	8.44	8.44	8.44	8.44	8.44	0.73813	0.996263		33200	N/A	7.25	7.32	7.23	7.53	7.63	7.92	8.16	8.28	N/A	8.44	1990-11-23	1
1	1	1	1	1	8.42		8.42	8.42	8.42	8.42	8.42	8.42	8.42	8.42	8.42	8.42	8.42	0.7142	0.967781		33203	N/A	7.26	7.33	7.24	7.55	7.65	7.92	8.17	8.27	N/A	8.42	1990-11-26	1
1	1	1	1	1	8.44		8.44	8.44	8.44	8.44	8.44	8.44	8.44	8.44	8.44	8.44	8.44	0.723608	0.980622		33204	N/A	7.27	7.34	7.28	7.5	7.66	7.94	8.18	8.28	N/A	8.44	1990-11-27	1
1	1	1	1	1	8.46		8.46	8.46	8.46	8.46	8.46	8.46	8.46	8.46	8.46	8.46	8.46	0.708122	0.959135		33205	N/A	7.29	7.38	7.34	7.56	7.71	7.94	8.22	8.3	N/A	8.46	1990-11-28	1
1	1	1	1	1	8.47		8.47	8.47	8.47	8.47	8.47	8.47	8.47	8.47	8.47	8.47	8.47	0.715027	0.97172		33206	N/A	7.26	7.38	7.34	7.58	7.72	7.96	8.23	8.32	N/A	8.47	1990-11-29	1
1	1	1	1	1	8.4		8.4	8.4	8.4	8.4	8.4	8.4	8.4	8.4	8.4	8.4	8.4	0.688424	0.935115		33207	N/A	7.24	7.36	7.31	7.53	7.67	7.91	8.18	8.26	N/A	8.4	1990-11-30	1
1	1	1	1	1	8.36		8.36	8.36	8.36	8.36	8.36	8.36	8.36	8.36	8.36	8.36	8.36	0.658787	0.891235		33210	N/A	7.28	7.37	7.31	7.51	7.65	7.88	8.14	8.22	N/A	8.36	1990-12-03	1
1	1	1	1	1	8.37		8.37	8.37	8.37	8.37	8.37	8.37	8.37	8.37	8.37	8.37	8.37	0.718028	0.965298		33211	N/A	7.24	7.23	7.25	7.46	7.58	7.83	8.11	8.2	N/A	8.37	1990-12-04	1
1	1	1	1	1	8.32		8.32	8.32	8.32	8.32	8.32	8.32	8.32	8.32	8.32	8.32	8.32	0.687704	0.930183		33212	N/A	7.23	7.21	7.24	7.46	7.58	7.82	8.09	8.16	N/A	8.32	1990-12-05	1
1	1	1	1	1	8.35		8.35	8.35	8.35	8.35	8.35	8.35	8.35	8.35	8.35	8.35	8.35	0.699643	0.943886		33213	N/A	7.22	7.23	7.27	7.48	7.6	7.82	8.11	8.18	N/A	8.35	1990-12-06	1
1	1	1	1	1	8.19		8.19	8.19	8.19	8.19	8.19	8.19	8.19	8.19	8.19	8.19	8.19	0.687631	0.927869		33214	N/A	7.1	7.08	7.12	7.33	7.45	7.67	7.96	8.03	N/A	8.19	1990-12-07	1
1	1	1	1	1	8.14		8.14	8.14	8.14	8.14	8.14	8.14	8.14	8.14	8.14	8.14	8.14	0.678387	0.913904		33217	N/A	7.07	7.04	7.1	7.28	7.4	7.63	7.91	7.98	N/A	8.14	1990-12-10	1
1	1	1	1	1	8.1		8.1	8.1	8.1	8.1	8.1	8.1	8.1	8.1	8.1	8.1	8.1	0.658966	0.886533		33218	N/A	7.06	7.06	7.07	7.26	7.38	7.6	7.87	7.94	N/A	8.1	1990-12-11	1
1	1	1	1	1	8.07		8.07	8.07	8.07	8.07	8.07	8.07	8.07	8.07	8.07	8.07	8.07	0.670847	0.904865		33219	N/A	7	7	7.03	7.22	7.33	7.59	7.84	7.91	N/A	8.07	1990-12-12	1
1	1	1	1	1	8.14		8.14	8.14	8.14	8.14	8.14	8.14	8.14	8.14	8.14	8.14	8.14	0.671254	0.910813		33220	N/A	7.05	7.04	7.11	7.31	7.42	7.68	7.91	7.98	N/A	8.14	1990-12-13	1
1	1	1	1	1	8.2		8.2	8.2	8.2	8.2	8.2	8.2	8.2	8.2	8.2	8.2	8.2	0.695995	0.949589		33221	N/A	7.06	7.08	7.09	7.35	7.47	7.74	7.97	8.05	N/A	8.2	1990-12-14	1
1	1	1	1	1	8.18		8.18	8.18	8.18	8.18	8.18	8.18	8.18	8.18	8.18	8.18	8.18	0.701738	0.958019		33224	N/A	7.02	7.07	7.06	7.31	7.45	7.71	7.96	8.02	N/A	8.18	1990-12-17	1
1	1	1	1	1	8.15		8.15	8.15	8.15	8.15	8.15	8.15	8.15	8.15	8.15	8.15	8.15	0.711899	0.97035		33225	N/A	6.94	7.05	7.02	7.28	7.4	7.67	7.93	7.99	N/A	8.15	1990-12-18	1
1	1	1	1	1	8.19		8.19	8.19	8.19	8.19	8.19	8.19	8.19	8.19	8.19	8.19	8.19	0.810292	1.10801		33226	N/A	6.83	6.91	6.89	7.21	7.37	7.64	7.92	8	N/A	8.19	1990-12-19	1
1	1	1	1	1	8.22		8.22	8.22	8.22	8.22	8.22	8.22	8.22	8.22	8.22	8.22	8.22	0.837844	1.1547		33227	N/A	6.75	6.87	6.9	7.25	7.41	7.67	7.96	8.05	N/A	8.22	1990-12-20	1
1	1	1	1	1	8.28		8.28	8.28	8.28	8.28	8.28	8.28	8.28	8.28	8.28	8.28	8.28	0.841519	1.16146		33228	N/A	6.79	6.94	6.95	7.3	7.46	7.75	8.03	8.11	N/A	8.28	1990-12-21	1
1	1	1	1	1	8.36		8.36	8.36	8.36	8.36	8.36	8.36	8.36	8.36	8.36	8.36	8.36	0.883408	1.22817		33231	N/A	6.73	6.95	6.99	7.35	7.53	7.84	8.12	8.2	N/A	8.36	1990-12-24	1
1	1	1	1	1	8.3		8.3	8.3	8.3	8.3	8.3	8.3	8.3	8.3	8.3	8.3	8.3	0.876605	1.22205		33233	N/A	6.68	6.91	6.94	7.27	7.5	7.78	8.07	8.15	N/A	8.3	1990-12-26	1
1	1	1	1	1	8.25		8.25	8.25	8.25	8.25	8.25	8.25	8.25	8.25	8.25	8.25	8.25	0.850144	1.1839		33234	N/A	6.67	6.91	6.94	7.25	7.46	7.75	8.03	8.11	N/A	8.25	1990-12-27	1
1	1	1	1	1	8.31		8.31	8.31	8.31	8.31	8.31	8.31	8.31	8.31	8.31	8.31	8.31	0.907329	1.26524		33235	N/A	6.64	6.85	6.91	7.25	7.48	7.78	8.08	8.14	N/A	8.31	1990-12-28	1
1	1	1	1	1	8.26		8.26	8.26	8.26	8.26	8.26	8.26	8.26	8.26	8.26	8.26	8.26	0.928317	1.28868		33238	N/A	6.63	6.73	6.82	7.15	7.4	7.68	8	8.08	N/A	8.26	1990-12-31	1
1	1	1	1	1	8.14		8.14	8.14	8.14	8.14	8.14	8.14	8.14	8.14	8.14	8.14	8.14	0.871608	1.20516		33240	N/A	6.66	6.73	6.74	7.08	7.3	7.59	7.9	7.97	N/A	8.14	1991-01-02	1
1	1	1	1	1	8.11		8.11	8.11	8.11	8.11	8.11	8.11	8.11	8.11	8.11	8.11	8.11	0.864286	1.1928		33241	N/A	6.64	6.71	6.72	7.08	7.27	7.56	7.86	7.93	N/A	8.11	1991-01-03	1
1	1	1	1	1	8.2		8.2	8.2	8.2	8.2	8.2	8.2	8.2	8.2	8.2	8.2	8.2	0.857825	1.18348		33242	N/A	6.73	6.82	6.83	7.17	7.37	7.65	7.94	8.02	N/A	8.2	1991-01-04	1
1	1	1	1	1	8.32		8.32	8.32	8.32	8.32	8.32	8.32	8.32	8.32	8.32	8.32	8.32	0.927303	1.28275		33245	N/A	6.71	6.84	6.84	7.2	7.43	7.75	8.04	8.13	N/A	8.32	1991-01-07	1
1	1	1	1	1	8.37		8.37	8.37	8.37	8.37	8.37	8.37	8.37	8.37	8.37	8.37	8.37	1.01175	1.39733		33246	N/A	6.64	6.74	6.75	7.15	7.39	7.74	8.06	8.16	N/A	8.37	1991-01-08	1
1	1	1	1	1	8.46		8.46	8.46	8.46	8.46	8.46	8.46	8.46	8.46	8.46	8.46	8.46	1.1323	1.58246		33247	N/A	6.44	6.61	6.68	7.1	7.46	7.81	8.12	8.25	N/A	8.46	1991-01-09	1
1	1	1	1	1	8.37		8.37	8.37	8.37	8.37	8.37	8.37	8.37	8.37	8.37	8.37	8.37	1.09236	1.52491		33248	N/A	6.4	6.57	6.64	7.14	7.39	7.76	8.02	8.16	N/A	8.37	1991-01-10	1
1	1	1	1	1	8.39		8.39	8.39	8.39	8.39	8.39	8.39	8.39	8.39	8.39	8.39	8.39	1.11879	1.56739		33249	N/A	6.34	6.55	6.62	7.14	7.4	7.79	8.06	8.2	N/A	8.39	1991-01-11	1
1	1	1	1	1	8.41		8.41	8.41	8.41	8.41	8.41	8.41	8.41	8.41	8.41	8.41	8.41	1.15543	1.62859		33252	N/A	6.24	6.47	6.6	7.18	7.44	7.82	8.09	8.23	N/A	8.41	1991-01-14	1
1	1	1	1	1	8.41		8.41	8.41	8.41	8.41	8.41	8.41	8.41	8.41	8.41	8.41	8.41	1.16652	1.64146		33253	N/A	6.23	6.44	6.6	7.16	7.43	7.79	8.07	8.22	N/A	8.41	1991-01-15	1
1	1	1	1	1	8.4		8.4	8.4	8.4	8.4	8.4	8.4	8.4	8.4	8.4	8.4	8.4	1.14605	1.62088		33254	N/A	6.22	6.46	6.61	7.21	7.47	7.83	8.09	8.24	N/A	8.4	1991-01-16	1
1	1	1	1	1	8.18		8.18	8.18	8.18	8.18	8.18	8.18	8.18	8.18	8.18	8.18	8.18	0.968936	1.37472		33255	N/A	6.3	6.56	6.66	7.19	7.42	7.71	7.93	8.05	N/A	8.18	1991-01-17	1
1	1	1	1	1	8.17		8.17	8.17	8.17	8.17	8.17	8.17	8.17	8.17	8.17	8.17	8.17	0.996416	1.41244		33256	N/A	6.24	6.51	6.61	7.14	7.38	7.68	7.92	8.03	N/A	8.17	1991-01-18	1
1	1	1	1	1	8.23		8.23	8.23	8.23	8.23	8.23	8.23	8.23	8.23	8.23	8.23	8.23	1.04674	1.47799		33260	N/A	6.24	6.48	6.59	7.13	7.37	7.7	7.94	8.07	N/A	8.23	1991-01-22	1
1	1	1	1	1	8.21		8.21	8.21	8.21	8.21	8.21	8.21	8.21	8.21	8.21	8.21	8.21	1.02535	1.44442		33261	N/A	6.32	6.49	6.59	7.08	7.36	7.67	7.91	8.04	N/A	8.21	1991-01-23	1
1	1	1	1	1	8.18		8.18	8.18	8.18	8.18	8.18	8.18	8.18	8.18	8.18	8.18	8.18	1.02678	1.44293		33262	N/A	6.31	6.47	6.54	7.04	7.32	7.61	7.88	8	N/A	8.18	1991-01-24	1
1	1	1	1	1	8.24		8.24	8.24	8.24	8.24	8.24	8.24	8.24	8.24	8.24	8.24	8.24	1.03198	1.44824		33263	N/A	6.35	6.52	6.61	7.1	7.36	7.67	7.93	8.06	N/A	8.24	1991-01-25	1
1	1	1	1	1	8.23		8.23	8.23	8.23	8.23	8.23	8.23	8.23	8.23	8.23	8.23	8.23	0.997346	1.39905		33266	N/A	6.44	6.55	6.64	7.12	7.38	7.67	7.93	8.06	N/A	8.23	1991-01-28	1
1	1	1	1	1	8.2		8.2	8.2	8.2	8.2	8.2	8.2	8.2	8.2	8.2	8.2	8.2	0.9947	1.3949		33267	N/A	6.41	6.55	6.59	7.1	7.35	7.64	7.9	8.03	N/A	8.2	1991-01-29	1
1	1	1	1	1	8.23		8.23	8.23	8.23	8.23	8.23	8.23	8.23	8.23	8.23	8.23	8.23	1.03096	1.44292		33268	N/A	6.39	6.53	6.56	7.07	7.34	7.64	7.9	8.05	N/A	8.23	1991-01-30	1
1	1	1	1	1	8.21		8.21	8.21	8.21	8.21	8.21	8.21	8.21	8.21	8.21	8.21	8.21	1.03969	1.45462		33269	N/A	6.37	6.49	6.51	7.05	7.3	7.62	7.89	8.03	N/A	8.21	1991-01-31	1
1	1	1	1	1	8.09		8.09	8.09	8.09	8.09	8.09	8.09	8.09	8.09	8.09	8.09	8.09	1.10973	1.54977		33270	N/A	6.17	6.24	6.27	6.83	7.1	7.45	7.75	7.91	N/A	8.09	1991-02-01	1
1	1	1	1	1	8.05		8.05	8.05	8.05	8.05	8.05	8.05	8.05	8.05	8.05	8.05	8.05	1.0952	1.53045		33273	N/A	6.15	6.23	6.24	6.82	7.07	7.43	7.72	7.88	N/A	8.05	1991-02-04	1
1	1	1	1	1	8.02		8.02	8.02	8.02	8.02	8.02	8.02	8.02	8.02	8.02	8.02	8.02	1.0918	1.51669		33274	N/A	6.15	6.2	6.23	6.8	6.98	7.4	7.68	7.85	N/A	8.02	1991-02-05	1
1	1	1	1	1	8.02		8.02	8.02	8.02	8.02	8.02	8.02	8.02	8.02	8.02	8.02	8.02	1.11158	1.54777		33275	N/A	6.08	6.14	6.22	6.82	6.99	7.4	7.68	7.79	N/A	8.02	1991-02-06	1
1	1	1	1	1	8.01		8.01	8.01	8.01	8.01	8.01	8.01	8.01	8.01	8.01	8.01	8.01	1.09555	1.52984		33276	N/A	6.11	6.15	6.23	6.8	7	7.42	7.7	7.82	N/A	8.01	1991-02-07	1
1	1	1	1	1	7.95		7.95	7.95	7.95	7.95	7.95	7.95	7.95	7.95	7.95	7.95	7.95	1.06132	1.48659		33277	N/A	6.09	6.15	6.21	6.8	6.99	7.4	7.66	7.77	N/A	7.95	1991-02-08	1
1	1	1	1	1	7.97		7.97	7.97	7.97	7.97	7.97	7.97	7.97	7.97	7.97	7.97	7.97	1.09576	1.5292		33280	N/A	6.05	6.13	6.18	6.78	6.95	7.39	7.65	7.78	N/A	7.97	1991-02-11	1
1	1	1	1	1	7.96		7.96	7.96	7.96	7.96	7.96	7.96	7.96	7.96	7.96	7.96	7.96	1.09132	1.52796		33281	N/A	6.02	6.13	6.18	6.78	6.97	7.39	7.66	7.78	N/A	7.96	1991-02-12	1
1	1	1	1	1	7.97		7.97	7.97	7.97	7.97	7.97	7.97	7.97	7.97	7.97	7.97	7.97	1.09177	1.52728		33282	N/A	6.03	6.13	6.21	6.78	6.98	7.39	7.66	7.78	N/A	7.97	1991-02-13	1
1	1	1	1	1	7.99		7.99	7.99	7.99	7.99	7.99	7.99	7.99	7.99	7.99	7.99	7.99	1.11649	1.56086		33283	N/A	6.02	6.1	6.19	6.77	6.98	7.38	7.67	7.8	N/A	7.99	1991-02-14	1
1	1	1	1	1	7.97		7.97	7.97	7.97	7.97	7.97	7.97	7.97	7.97	7.97	7.97	7.97	1.06625	1.49423		33284	N/A	6.08	6.16	6.24	6.82	7.02	7.41	7.67	7.78	N/A	7.97	1991-02-15	1
1	1	1	1	1	7.99		7.99	7.99	7.99	7.99	7.99	7.99	7.99	7.99	7.99	7.99	7.99	1.04541	1.46794		33288	N/A	6.13	6.2	6.3	6.87	7.07	7.46	7.7	7.8	N/A	7.99	1991-02-19	1
1	1	1	1	1	8.02		8.02	8.02	8.02	8.02	8.02	8.02	8.02	8.02	8.02	8.02	8.02	1.07145	1.50646		33289	N/A	6.11	6.19	6.28	6.87	7.08	7.49	7.73	7.84	N/A	8.02	1991-02-20	1
1	1	1	1	1	8.04		8.04	8.04	8.04	8.04	8.04	8.04	8.04	8.04	8.04	8.04	8.04	1.08162	1.52719		33290	N/A	6.09	6.17	6.29	6.9	7.13	7.51	7.77	7.88	N/A	8.04	1991-02-21	1
1	1	1	1	1	8.07		8.07	8.07	8.07	8.07	8.07	8.07	8.07	8.07	8.07	8.07	8.07	1.06521	1.51022		33291	N/A	6.12	6.23	6.33	6.98	7.21	7.57	7.82	7.91	N/A	8.07	1991-02-22	1
1	1	1	1	1	8.05		8.05	8.05	8.05	8.05	8.05	8.05	8.05	8.05	8.05	8.05	8.05	1.0416	1.47608		33294	N/A	6.16	6.25	6.33	6.99	7.2	7.57	7.79	7.91	N/A	8.05	1991-02-25	1
1	1	1	1	1	8.14		8.14	8.14	8.14	8.14	8.14	8.14	8.14	8.14	8.14	8.14	8.14	1.07456	1.51687		33295	N/A	6.22	6.3	6.37	7	7.24	7.62	7.85	7.96	N/A	8.14	1991-02-26	1
1	1	1	1	1	8.15		8.15	8.15	8.15	8.15	8.15	8.15	8.15	8.15	8.15	8.15	8.15	1.08372	1.53242		33296	N/A	6.21	6.28	6.36	7.02	7.25	7.64	7.87	7.98	N/A	8.15	1991-02-27	1
1	1	1	1	1	8.19		8.19	8.19	8.19	8.19	8.19	8.19	8.19	8.19	8.19	8.19	8.19	1.09268	1.54069		33297	N/A	6.22	6.32	6.41	7.04	7.26	7.66	7.89	8.02	N/A	8.19	1991-02-28	1
1	1	1	1	1	8.28		8.28	8.28	8.28	8.28	8.28	8.28	8.28	8.28	8.28	8.28	8.28	1.08998	1.54646		33298	N/A	6.27	6.38	6.52	7.18	7.41	7.78	8	8.12	N/A	8.28	1991-03-01	1
1	1	1	1	1	8.29		8.29	8.29	8.29	8.29	8.29	8.29	8.29	8.29	8.29	8.29	8.29	1.10957	1.57307		33301	N/A	6.24	6.36	6.51	7.16	7.4	7.77	8.01	8.12	N/A	8.29	1991-03-04	1
1	1	1	1	1	8.25		8.25	8.25	8.25	8.25	8.25	8.25	8.25	8.25	8.25	8.25	8.25	1.09936	1.55642		33302	N/A	6.25	6.32	6.48	7.13	7.35	7.73	7.98	8.08	N/A	8.25	1991-03-05	1
1	1	1	1	1	8.29		8.29	8.29	8.29	8.29	8.29	8.29	8.29	8.29	8.29	8.29	8.29	1.10851	1.56891		33303	N/A	6.28	6.35	6.5	7.15	7.38	7.77	8.01	8.11	N/A	8.29	1991-03-06	1
1	1	1	1	1	8.23		8.23	8.23	8.23	8.23	8.23	8.23	8.23	8.23	8.23	8.23	8.23	1.07445	1.52076		33304	N/A	6.27	6.36	6.5	7.12	7.34	7.73	7.97	8.07	N/A	8.23	1991-03-07	1
1	1	1	1	1	8.3		8.3	8.3	8.3	8.3	8.3	8.3	8.3	8.3	8.3	8.3	8.3	1.17315	1.66389		33305	N/A	6.16	6.25	6.41	7.08	7.35	7.77	8.01	8.13	N/A	8.3	1991-03-08	1
1	1	1	1	1	8.23		8.23	8.23	8.23	8.23	8.23	8.23	8.23	8.23	8.23	8.23	8.23	1.16006	1.64651		33308	N/A	6.08	6.21	6.37	7.05	7.3	7.71	7.94	8.06	N/A	8.23	1991-03-11	1
1	1	1	1	1	8.26		8.26	8.26	8.26	8.26	8.26	8.26	8.26	8.26	8.26	8.26	8.26	1.18176	1.68045		33309	N/A	6.05	6.19	6.38	7.07	7.33	7.74	7.98	8.09	N/A	8.26	1991-03-12	1
1	1	1	1	1	8.2		8.2	8.2	8.2	8.2	8.2	8.2	8.2	8.2	8.2	8.2	8.2	1.18579	1.681		33310	N/A	6.02	6.12	6.3	7	7.23	7.67	7.91	8.02	N/A	8.2	1991-03-13	1
1	1	1	1	1	8.2		8.2	8.2	8.2	8.2	8.2	8.2	8.2	8.2	8.2	8.2	8.2	1.2268	1.73777		33311	N/A	5.94	6.04	6.26	6.95	7.19	7.64	7.9	8.02	N/A	8.2	1991-03-14	1
1	1	1	1	1	8.3		8.3	8.3	8.3	8.3	8.3	8.3	8.3	8.3	8.3	8.3	8.3	1.25898	1.7825		33312	N/A	5.98	6.1	6.3	7.01	7.26	7.73	7.98	8.1	N/A	8.3	1991-03-15	1
1	1	1	1	1	8.34		8.34	8.34	8.34	8.34	8.34	8.34	8.34	8.34	8.34	8.34	8.34	1.24724	1.77218		33315	N/A	6.03	6.13	6.36	7.09	7.35	7.79	8.04	8.15	N/A	8.34	1991-03-18	1
1	1	1	1	1	8.42		8.42	8.42	8.42	8.42	8.42	8.42	8.42	8.42	8.42	8.42	8.42	1.23238	1.75928		33316	N/A	6.08	6.23	6.48	7.22	7.48	7.93	8.14	8.25	N/A	8.42	1991-03-19	1
1	1	1	1	1	8.37		8.37	8.37	8.37	8.37	8.37	8.37	8.37	8.37	8.37	8.37	8.37	1.21937	1.74241		33317	N/A	6.07	6.18	6.44	7.2	7.46	7.88	8.09	8.2	N/A	8.37	1991-03-20	1
1	1	1	1	1	8.34		8.34	8.34	8.34	8.34	8.34	8.34	8.34	8.34	8.34	8.34	8.34	1.22614	1.74706		33318	N/A	6.06	6.15	6.39	7.13	7.4	7.82	8.04	8.16	N/A	8.34	1991-03-21	1
1	1	1	1	1	8.33		8.33	8.33	8.33	8.33	8.33	8.33	8.33	8.33	8.33	8.33	8.33	1.22166	1.74031		33319	N/A	6.06	6.16	6.37	7.13	7.39	7.82	8.03	8.13	N/A	8.33	1991-03-22	1
1	1	1	1	1	8.32		8.32	8.32	8.32	8.32	8.32	8.32	8.32	8.32	8.32	8.32	8.32	1.21294	1.72964		33322	N/A	6.07	6.17	6.35	7.14	7.39	7.83	8.03	8.13	N/A	8.32	1991-03-25	1
1	1	1	1	1	8.31		8.31	8.31	8.31	8.31	8.31	8.31	8.31	8.31	8.31	8.31	8.31	1.20528	1.72194		33323	N/A	6.05	6.14	6.39	7.16	7.4	7.84	8.04	8.13	N/A	8.31	1991-03-26	1
1	1	1	1	1	8.26		8.26	8.26	8.26	8.26	8.26	8.26	8.26	8.26	8.26	8.26	8.26	1.21399	1.73472		33324	N/A	5.99	6.08	6.33	7.07	7.36	7.76	7.99	8.08	N/A	8.26	1991-03-27	1
1	1	1	1	1	8.24		8.24	8.24	8.24	8.24	8.24	8.24	8.24	8.24	8.24	8.24	8.24	1.2346	1.76116		33325	N/A	5.92	6.05	6.28	7.02	7.3	7.73	7.96	8.05	N/A	8.24	1991-03-28	1
1	1	1	1	1	8.25		8.25	8.25	8.25	8.25	8.25	8.25	8.25	8.25	8.25	8.25	8.25	1.24139	1.77077		33329	N/A	5.94	6.04	6.27	7.01	7.3	7.74	7.97	8.07	N/A	8.25	1991-04-01	1
1	1	1	1	1	8.22		8.22	8.22	8.22	8.22	8.22	8.22	8.22	8.22	8.22	8.22	8.22	1.23008	1.74734		33330	N/A	5.95	6.05	6.26	6.97	7.24	7.68	7.92	8.03	N/A	8.22	1991-04-02	1
1	1	1	1	1	8.24		8.24	8.24	8.24	8.24	8.24	8.24	8.24	8.24	8.24	8.24	8.24	1.23393	1.75503		33331	N/A	5.95	6.06	6.28	6.99	7.27	7.71	7.94	8.05	N/A	8.24	1991-04-03	1
1	1	1	1	1	8.19		8.19	8.19	8.19	8.19	8.19	8.19	8.19	8.19	8.19	8.19	8.19	1.2253	1.74261		33332	N/A	5.92	6.03	6.24	6.94	7.22	7.67	7.9	8	N/A	8.19	1991-04-04	1
1	1	1	1	1	8.18		8.18	8.18	8.18	8.18	8.18	8.18	8.18	8.18	8.18	8.18	8.18	1.23088	1.74953		33333	N/A	5.89	6.01	6.24	6.92	7.2	7.65	7.89	7.99	N/A	8.18	1991-04-05	1
1	1	1	1	1	8.16		8.16	8.16	8.16	8.16	8.16	8.16	8.16	8.16	8.16	8.16	8.16	1.23892	1.76579		33336	N/A	5.83	5.97	6.21	6.91	7.21	7.63	7.88	7.98	N/A	8.16	1991-04-08	1
1	1	1	1	1	8.2		8.2	8.2	8.2	8.2	8.2	8.2	8.2	8.2	8.2	8.2	8.2	1.26679	1.80771		33337	N/A	5.79	5.95	6.23	6.94	7.23	7.68	7.93	8.03	N/A	8.2	1991-04-09	1
1	1	1	1	1	8.27		8.27	8.27	8.27	8.27	8.27	8.27	8.27	8.27	8.27	8.27	8.27	1.28869	1.8419		33338	N/A	5.79	5.97	6.28	7.02	7.31	7.75	7.98	8.1	N/A	8.27	1991-04-10	1
1	1	1	1	1	8.27		8.27	8.27	8.27	8.27	8.27	8.27	8.27	8.27	8.27	8.27	8.27	1.32522	1.89074		33339	N/A	5.74	5.91	6.23	6.95	7.25	7.74	7.97	8.09	N/A	8.27	1991-04-11	1
1	1	1	1	1	8.16		8.16	8.16	8.16	8.16	8.16	8.16	8.16	8.16	8.16	8.16	8.16	1.29247	1.84511		33340	N/A	5.68	5.89	6.14	6.88	7.18	7.64	7.86	7.98	N/A	8.16	1991-04-12	1
1	1	1	1	1	8.12		8.12	8.12	8.12	8.12	8.12	8.12	8.12	8.12	8.12	8.12	8.12	1.22574	1.74851		33343	N/A	5.77	5.96	6.22	6.9	7.17	7.64	7.84	7.95	N/A	8.12	1991-04-15	1
1	1	1	1	1	8.13		8.13	8.13	8.13	8.13	8.13	8.13	8.13	8.13	8.13	8.13	8.13	1.22444	1.74941		33344	N/A	5.79	5.95	6.23	6.92	7.2	7.66	7.85	7.97	N/A	8.13	1991-04-16	1
1	1	1	1	1	8.11		8.11	8.11	8.11	8.11	8.11	8.11	8.11	8.11	8.11	8.11	8.11	1.24	1.77229		33345	N/A	5.73	5.89	6.2	6.9	7.17	7.64	7.83	7.95	N/A	8.11	1991-04-17	1
1	1	1	1	1	8.18		8.18	8.18	8.18	8.18	8.18	8.18	8.18	8.18	8.18	8.18	8.18	1.21684	1.73881		33346	N/A	5.84	5.98	6.34	6.99	7.24	7.74	7.92	8.02	N/A	8.18	1991-04-18	1
1	1	1	1	1	8.24		8.24	8.24	8.24	8.24	8.24	8.24	8.24	8.24	8.24	8.24	8.24	1.22777	1.753		33347	N/A	5.93	6.04	6.31	7.03	7.27	7.8	7.99	8.1	N/A	8.24	1991-04-19	1
1	1	1	1	1	8.3		8.3	8.3	8.3	8.3	8.3	8.3	8.3	8.3	8.3	8.3	8.3	1.27651	1.82112		33350	N/A	5.87	6.01	6.32	7.07	7.29	7.83	8.02	8.15	N/A	8.3	1991-04-22	1
1	1	1	1	1	8.28		8.28	8.28	8.28	8.28	8.28	8.28	8.28	8.28	8.28	8.28	8.28	1.26661	1.80485		33351	N/A	5.89	6.03	6.28	7.05	7.28	7.78	7.99	8.12	N/A	8.28	1991-04-23	1
1	1	1	1	1	8.22		8.22	8.22	8.22	8.22	8.22	8.22	8.22	8.22	8.22	8.22	8.22	1.26135	1.80057		33352	N/A	5.84	5.99	6.23	6.95	7.25	7.73	7.93	8.06	N/A	8.22	1991-04-24	1
1	1	1	1	1	8.24		8.24	8.24	8.24	8.24	8.24	8.24	8.24	8.24	8.24	8.24	8.24	1.30082	1.85303		33353	N/A	5.78	5.96	6.19	6.93	7.22	7.7	7.95	8.07	N/A	8.24	1991-04-25	1
1	1	1	1	1	8.22		8.22	8.22	8.22	8.22	8.22	8.22	8.22	8.22	8.22	8.22	8.22	1.28163	1.82684		33354	N/A	5.79	5.99	6.21	6.89	7.23	7.68	7.93	8.06	N/A	8.22	1991-04-26	1
1	1	1	1	1	8.23		8.23	8.23	8.23	8.23	8.23	8.23	8.23	8.23	8.23	8.23	8.23	1.29122	1.83973		33357	N/A	5.77	5.98	6.22	6.9	7.22	7.7	7.93	8.07	N/A	8.23	1991-04-29	1
1	1	1	1	1	8.2		8.2	8.2	8.2	8.2	8.2	8.2	8.2	8.2	8.2	8.2	8.2	1.35073	1.9239		33358	N/A	5.68	5.83	6.06	6.8	7.15	7.63	7.88	8.02	N/A	8.2	1991-04-30	1
1	1	1	1	1	8.18		8.18	8.18	8.18	8.18	8.18	8.18	8.18	8.18	8.18	8.18	8.18	1.32658	1.88939		33359	N/A	5.71	5.84	6.09	6.8	7.14	7.63	7.87	8.01	N/A	8.18	1991-05-01	1
1	1	1	1	1	8.14		8.14	8.14	8.14	8.14	8.14	8.14	8.14	8.14	8.14	8.14	8.14	1.32787	1.89279		33360	N/A	5.63	5.82	6.06	6.76	7.11	7.59	7.84	7.97	N/A	8.14	1991-05-02	1
1	1	1	1	1	8.22		8.22	8.22	8.22	8.22	8.22	8.22	8.22	8.22	8.22	8.22	8.22	1.36295	1.94316		33361	N/A	5.64	5.83	6.1	6.8	7.16	7.67	7.91	8.04	N/A	8.22	1991-05-03	1
1	1	1	1	1	8.23		8.23	8.23	8.23	8.23	8.23	8.23	8.23	8.23	8.23	8.23	8.23	1.36343	1.94191		33364	N/A	5.64	5.85	6.11	6.82	7.16	7.67	7.91	8.05	N/A	8.23	1991-05-06	1
1	1	1	1	1	8.24		8.24	8.24	8.24	8.24	8.24	8.24	8.24	8.24	8.24	8.24	8.24	1.35437	1.91929		33365	N/A	5.67	5.91	6.15	6.82	7.1	7.67	7.92	8.06	N/A	8.24	1991-05-07	1
1	1	1	1	1	8.24		8.24	8.24	8.24	8.24	8.24	8.24	8.24	8.24	8.24	8.24	8.24	1.35381	1.92096		33366	N/A	5.67	5.9	6.14	6.84	7.12	7.68	7.92	8.04	N/A	8.24	1991-05-08	1
1	1	1	1	1	8.21		8.21	8.21	8.21	8.21	8.21	8.21	8.21	8.21	8.21	8.21	8.21	1.33922	1.90469		33367	N/A	5.65	5.89	6.13	6.84	7.12	7.68	7.92	8.02	N/A	8.21	1991-05-09	1
1	1	1	1	1	8.33		8.33	8.33	8.33	8.33	8.33	8.33	8.33	8.33	8.33	8.33	8.33	1.41357	2.00781		33368	N/A	5.65	5.88	6.13	6.87	7.17	7.76	8	8.12	N/A	8.33	1991-05-10	1
1	1	1	1	1	8.27		8.27	8.27	8.27	8.27	8.27	8.27	8.27	8.27	8.27	8.27	8.27	1.38568	1.96891		33371	N/A	5.65	5.86	6.11	6.84	7.13	7.72	7.96	8.07	N/A	8.27	1991-05-13	1
1	1	1	1	1	8.36		8.36	8.36	8.36	8.36	8.36	8.36	8.36	8.36	8.36	8.36	8.36	1.43721	2.03509		33372	N/A	5.66	5.88	6.12	6.86	7.13	7.78	8.02	8.14	N/A	8.36	1991-05-14	1
1	1	1	1	1	8.34		8.34	8.34	8.34	8.34	8.34	8.34	8.34	8.34	8.34	8.34	8.34	1.43472	2.03386		33373	N/A	5.62	5.86	6.13	6.84	7.12	7.77	8.02	8.13	N/A	8.34	1991-05-15	1
1	1	1	1	1	8.33		8.33	8.33	8.33	8.33	8.33	8.33	8.33	8.33	8.33	8.33	8.33	1.43741	2.03913		33374	N/A	5.57	5.84	6.15	6.84	7.12	7.77	7.99	8.12	N/A	8.33	1991-05-16	1
1	1	1	1	1	8.28		8.28	8.28	8.28	8.28	8.28	8.28	8.28	8.28	8.28	8.28	8.28	1.39958	1.99286		33375	N/A	5.57	5.83	6.16	6.86	7.14	7.77	7.98	8.08	N/A	8.28	1991-05-17	1
1	1	1	1	1	8.3		8.3	8.3	8.3	8.3	8.3	8.3	8.3	8.3	8.3	8.3	8.3	1.38765	1.97327		33378	N/A	5.63	5.88	6.2	6.86	7.16	7.78	7.98	8.1	N/A	8.3	1991-05-20	1
1	1	1	1	1	8.26		8.26	8.26	8.26	8.26	8.26	8.26	8.26	8.26	8.26	8.26	8.26	1.35546	1.92492		33379	N/A	5.67	5.92	6.18	6.84	7.13	7.74	7.95	8.06	N/A	8.26	1991-05-21	1
1	1	1	1	1	8.28		8.28	8.28	8.28	8.28	8.28	8.28	8.28	8.28	8.28	8.28	8.28	1.39218	1.97263		33380	N/A	5.63	5.91	6.15	6.77	7.1	7.72	7.95	8.06	N/A	8.28	1991-05-22	1
1	1	1	1	1	8.31		8.31	8.31	8.31	8.31	8.31	8.31	8.31	8.31	8.31	8.31	8.31	1.43402	2.03125		33381	N/A	5.57	5.88	6.13	6.74	7.1	7.71	7.96	8.1	N/A	8.31	1991-05-23	1
1	1	1	1	1	8.31		8.31	8.31	8.31	8.31	8.31	8.31	8.31	8.31	8.31	8.31	8.31	1.44278	2.04337		33382	N/A	5.57	5.88	6.11	6.69	7.1	7.68	7.97	8.1	N/A	8.31	1991-05-24	1
1	1	1	1	1	8.28		8.28	8.28	8.28	8.28	8.28	8.28	8.28	8.28	8.28	8.28	8.28	1.4254	2.01664		33386	N/A	5.59	5.87	6.12	6.66	7.07	7.66	7.93	8.07	N/A	8.28	1991-05-28	1
1	1	1	1	1	8.29		8.29	8.29	8.29	8.29	8.29	8.29	8.29	8.29	8.29	8.29	8.29	1.43512	2.02781		33387	N/A	5.62	5.87	6.11	6.61	7.06	7.66	7.92	8.07	N/A	8.29	1991-05-29	1
1	1	1	1	1	8.22		8.22	8.22	8.22	8.22	8.22	8.22	8.22	8.22	8.22	8.22	8.22	1.38787	1.96342		33388	N/A	5.62	5.87	6.13	6.6	7.03	7.63	7.89	8.02	N/A	8.22	1991-05-30	1
1	1	1	1	1	8.26		8.26	8.26	8.26	8.26	8.26	8.26	8.26	8.26	8.26	8.26	8.26	1.36905	1.93862		33389	N/A	5.71	5.94	6.16	6.68	7.1	7.69	7.92	8.06	N/A	8.26	1991-05-31	1
1	1	1	1	1	8.34		8.34	8.34	8.34	8.34	8.34	8.34	8.34	8.34	8.34	8.34	8.34	1.36125	1.93212		33392	N/A	5.79	6	6.27	6.79	7.21	7.8	8.01	8.14	N/A	8.34	1991-06-03	1
1	1	1	1	1	8.34		8.34	8.34	8.34	8.34	8.34	8.34	8.34	8.34	8.34	8.34	8.34	1.37335	1.95236		33393	N/A	5.74	5.98	6.26	6.79	7.22	7.8	8.02	8.14	N/A	8.34	1991-06-04	1
1	1	1	1	1	8.39		8.39	8.39	8.39	8.39	8.39	8.39	8.39	8.39	8.39	8.39	8.39	1.38946	1.97559		33394	N/A	5.76	6	6.28	6.83	7.26	7.84	8.07	8.19	N/A	8.39	1991-06-05	1
1	1	1	1	1	8.42		8.42	8.42	8.42	8.42	8.42	8.42	8.42	8.42	8.42	8.42	8.42	1.40601	2.00532		33395	N/A	5.74	5.98	6.29	6.86	7.31	7.89	8.12	8.23	N/A	8.42	1991-06-06	1
1	1	1	1	1	8.48		8.48	8.48	8.48	8.48	8.48	8.48	8.48	8.48	8.48	8.48	8.48	1.40537	2.0113		33396	N/A	5.74	6.01	6.39	6.98	7.43	7.96	8.18	8.29	N/A	8.48	1991-06-07	1
1	1	1	1	1	8.48		8.48	8.48	8.48	8.48	8.48	8.48	8.48	8.48	8.48	8.48	8.48	1.39185	1.98922		33399	N/A	5.77	6.04	6.4	7.01	7.42	7.95	8.19	8.29	N/A	8.48	1991-06-10	1
1	1	1	1	1	8.48		8.48	8.48	8.48	8.48	8.48	8.48	8.48	8.48	8.48	8.48	8.48	1.39853	2.00003		33400	N/A	5.74	6.05	6.39	6.99	7.42	7.96	8.19	8.29	N/A	8.48	1991-06-11	1
1	1	1	1	1	8.55		8.55	8.55	8.55	8.55	8.55	8.55	8.55	8.55	8.55	8.55	8.55	1.42414	2.03755		33401	N/A	5.73	6.07	6.43	7.08	7.48	8.02	8.25	8.36	N/A	8.55	1991-06-12	1
1	1	1	1	1	8.53		8.53	8.53	8.53	8.53	8.53	8.53	8.53	8.53	8.53	8.53	8.53	1.40905	2.01568		33402	N/A	5.76	6.08	6.4	7.08	7.47	8	8.24	8.34	N/A	8.53	1991-06-13	1
1	1	1	1	1	8.47		8.47	8.47	8.47	8.47	8.47	8.47	8.47	8.47	8.47	8.47	8.47	1.38642	1.98287		33403	N/A	5.77	6.05	6.37	7.02	7.43	7.94	8.17	8.29	N/A	8.47	1991-06-14	1
1	1	1	1	1	8.49		8.49	8.49	8.49	8.49	8.49	8.49	8.49	8.49	8.49	8.49	8.49	1.3914	1.98823		33406	N/A	5.78	6.08	6.38	7.02	7.43	7.96	8.19	8.3	N/A	8.49	1991-06-17	1
1	1	1	1	1	8.52		8.52	8.52	8.52	8.52	8.52	8.52	8.52	8.52	8.52	8.52	8.52	1.40784	2.0106		33407	N/A	5.8	6.06	6.41	7	7.45	7.97	8.2	8.32	N/A	8.52	1991-06-18	1
1	1	1	1	1	8.52		8.52	8.52	8.52	8.52	8.52	8.52	8.52	8.52	8.52	8.52	8.52	1.43757	2.0526		33408	N/A	5.74	6.02	6.37	6.95	7.41	7.97	8.21	8.33	N/A	8.52	1991-06-19	1
1	1	1	1	1	8.48		8.48	8.48	8.48	8.48	8.48	8.48	8.48	8.48	8.48	8.48	8.48	1.43139	2.04106		33409	N/A	5.74	6	6.34	6.87	7.36	7.91	8.17	8.3	N/A	8.48	1991-06-20	1
1	1	1	1	1	8.51		8.51	8.51	8.51	8.51	8.51	8.51	8.51	8.51	8.51	8.51	8.51	1.43077	2.04266		33410	N/A	5.75	6.02	6.37	6.94	7.41	7.95	8.2	8.32	N/A	8.51	1991-06-21	1
1	1	1	1	1	8.51		8.51	8.51	8.51	8.51	8.51	8.51	8.51	8.51	8.51	8.51	8.51	1.42014	2.03263		33413	N/A	5.75	6.04	6.38	6.96	7.45	7.98	8.21	8.33	N/A	8.51	1991-06-24	1
1	1	1	1	1	8.51		8.51	8.51	8.51	8.51	8.51	8.51	8.51	8.51	8.51	8.51	8.51	1.41208	2.02105		33414	N/A	5.75	6.03	6.39	7.04	7.45	7.99	8.22	8.33	N/A	8.51	1991-06-25	1
1	1	1	1	1	8.51		8.51	8.51	8.51	8.51	8.51	8.51	8.51	8.51	8.51	8.51	8.51	1.42093	2.03546		33415	N/A	5.73	6.02	6.38	7.01	7.46	7.98	8.23	8.33	N/A	8.51	1991-06-26	1
1	1	1	1	1	8.49		8.49	8.49	8.49	8.49	8.49	8.49	8.49	8.49	8.49	8.49	8.49	1.41802	2.03064		33416	N/A	5.73	6	6.35	7	7.43	7.97	8.21	8.32	N/A	8.49	1991-06-27	1
1	1	1	1	1	8.42		8.42	8.42	8.42	8.42	8.42	8.42	8.42	8.42	8.42	8.42	8.42	1.40566	2.00825		33417	N/A	5.71	5.95	6.32	6.9	7.33	7.9	8.14	8.24	N/A	8.42	1991-06-28	1
1	1	1	1	1	8.44		8.44	8.44	8.44	8.44	8.44	8.44	8.44	8.44	8.44	8.44	8.44	1.38358	1.97936		33420	N/A	5.76	5.99	6.38	6.97	7.39	7.93	8.17	8.26	N/A	8.44	1991-07-01	1
1	1	1	1	1	8.44		8.44	8.44	8.44	8.44	8.44	8.44	8.44	8.44	8.44	8.44	8.44	1.37611	1.97145		33421	N/A	5.75	5.99	6.41	7	7.41	7.95	8.18	8.27	N/A	8.44	1991-07-02	1
1	1	1	1	1	8.42		8.42	8.42	8.42	8.42	8.42	8.42	8.42	8.42	8.42	8.42	8.42	1.3784	1.9754		33422	N/A	5.73	5.96	6.39	6.97	7.4	7.92	8.15	8.26	N/A	8.42	1991-07-03	1
1	1	1	1	1	8.49		8.49	8.49	8.49	8.49	8.49	8.49	8.49	8.49	8.49	8.49	8.49	1.40177	2.01365		33424	N/A	5.76	5.97	6.4	7.04	7.48	8.01	8.23	8.34	N/A	8.49	1991-07-05	1
1	1	1	1	1	8.51		8.51	8.51	8.51	8.51	8.51	8.51	8.51	8.51	8.51	8.51	8.51	1.43155	2.05549		33427	N/A	5.75	5.94	6.36	7	7.48	8	8.25	8.34	N/A	8.51	1991-07-08	1
1	1	1	1	1	8.53		8.53	8.53	8.53	8.53	8.53	8.53	8.53	8.53	8.53	8.53	8.53	1.44591	2.07344		33428	N/A	5.76	5.97	6.31	7	7.46	8.02	8.27	8.36	N/A	8.53	1991-07-09	1
1	1	1	1	1	8.53		8.53	8.53	8.53	8.53	8.53	8.53	8.53	8.53	8.53	8.53	8.53	1.45715	2.08947		33429	N/A	5.75	5.96	6.28	6.97	7.47	8	8.23	8.35	N/A	8.53	1991-07-10	1
1	1	1	1	1	8.47		8.47	8.47	8.47	8.47	8.47	8.47	8.47	8.47	8.47	8.47	8.47	1.42979	2.04917		33430	N/A	5.74	5.96	6.27	6.92	7.42	7.95	8.17	8.3	N/A	8.47	1991-07-11	1
1	1	1	1	1	8.44		8.44	8.44	8.44	8.44	8.44	8.44	8.44	8.44	8.44	8.44	8.44	1.42768	2.04129		33431	N/A	5.72	5.94	6.26	6.88	7.36	7.9	8.13	8.26	N/A	8.44	1991-07-12	1
1	1	1	1	1	8.44		8.44	8.44	8.44	8.44	8.44	8.44	8.44	8.44	8.44	8.44	8.44	1.41446	2.02201		33434	N/A	5.75	5.96	6.29	6.88	7.37	7.9	8.13	8.26	N/A	8.44	1991-07-15	1
1	1	1	1	1	8.46		8.46	8.46	8.46	8.46	8.46	8.46	8.46	8.46	8.46	8.46	8.46	1.41669	2.0201		33435	N/A	5.76	5.99	6.32	6.9	7.35	7.91	8.14	8.27	N/A	8.46	1991-07-16	1
1	1	1	1	1	8.49		8.49	8.49	8.49	8.49	8.49	8.49	8.49	8.49	8.49	8.49	8.49	1.4134	2.01612		33436	N/A	5.79	6.03	6.35	6.94	7.39	7.94	8.17	8.3	N/A	8.49	1991-07-17	1
1	1	1	1	1	8.5		8.5	8.5	8.5	8.5	8.5	8.5	8.5	8.5	8.5	8.5	8.5	1.42894	2.0419		33437	N/A	5.77	6.01	6.34	6.91	7.42	7.95	8.17	8.31	N/A	8.5	1991-07-18	1
1	1	1	1	1	8.48		8.48	8.48	8.48	8.48	8.48	8.48	8.48	8.48	8.48	8.48	8.48	1.43567	2.04776		33438	N/A	5.76	5.99	6.28	6.89	7.37	7.91	8.15	8.28	N/A	8.48	1991-07-19	1
1	1	1	1	1	8.48		8.48	8.48	8.48	8.48	8.48	8.48	8.48	8.48	8.48	8.48	8.48	1.42301	2.03095		33441	N/A	5.76	6.02	6.31	6.91	7.39	7.92	8.15	8.28	N/A	8.48	1991-07-22	1
1	1	1	1	1	8.5		8.5	8.5	8.5	8.5	8.5	8.5	8.5	8.5	8.5	8.5	8.5	1.4294	2.04207		33442	N/A	5.76	6.01	6.33	6.94	7.41	7.96	8.17	8.31	N/A	8.5	1991-07-23	1
1	1	1	1	1	8.42		8.42	8.42	8.42	8.42	8.42	8.42	8.42	8.42	8.42	8.42	8.42	1.40516	2.00413		33443	N/A	5.75	5.97	6.28	6.88	7.33	7.86	8.1	8.24	N/A	8.42	1991-07-24	1
1	1	1	1	1	8.38		8.38	8.38	8.38	8.38	8.38	8.38	8.38	8.38	8.38	8.38	8.38	1.37765	1.96329		33444	N/A	5.76	5.98	6.29	6.87	7.31	7.81	8.06	8.2	N/A	8.38	1991-07-25	1
1	1	1	1	1	8.39		8.39	8.39	8.39	8.39	8.39	8.39	8.39	8.39	8.39	8.39	8.39	1.3972	1.99077		33445	N/A	5.76	5.96	6.24	6.85	7.3	7.82	8.06	8.2	N/A	8.39	1991-07-26	1
1	1	1	1	1	8.39		8.39	8.39	8.39	8.39	8.39	8.39	8.39	8.39	8.39	8.39	8.39	1.40794	2.00458		33448	N/A	5.75	5.96	6.21	6.82	7.28	7.81	8.06	8.2	N/A	8.39	1991-07-29	1
1	1	1	1	1	8.39		8.39	8.39	8.39	8.39	8.39	8.39	8.39	8.39	8.39	8.39	8.39	1.40872	2.00486		33449	N/A	5.73	5.95	6.23	6.84	7.27	7.81	8.06	8.21	N/A	8.39	1991-07-30	1
1	1	1	1	1	8.36		8.36	8.36	8.36	8.36	8.36	8.36	8.36	8.36	8.36	8.36	8.36	1.4109	2.00459		33450	N/A	5.7	5.93	6.19	6.81	7.21	7.77	8.03	8.2	N/A	8.36	1991-07-31	1
1	1	1	1	1	8.38		8.38	8.38	8.38	8.38	8.38	8.38	8.38	8.38	8.38	8.38	8.38	1.41004	2.00116		33451	N/A	5.72	5.94	6.23	6.84	7.22	7.78	8.05	8.2	N/A	8.38	1991-08-01	1
1	1	1	1	1	8.25		8.25	8.25	8.25	8.25	8.25	8.25	8.25	8.25	8.25	8.25	8.25	1.4161	2.00435		33452	N/A	5.63	5.82	6.04	6.69	7.06	7.62	7.9	8.06	N/A	8.25	1991-08-02	1
1	1	1	1	1	8.24		8.24	8.24	8.24	8.24	8.24	8.24	8.24	8.24	8.24	8.24	8.24	1.39867	1.97768		33455	N/A	5.68	5.84	6.04	6.69	7.05	7.62	7.89	8.04	N/A	8.24	1991-08-05	1
1	1	1	1	1	8.18		8.18	8.18	8.18	8.18	8.18	8.18	8.18	8.18	8.18	8.18	8.18	1.43821	2.02764		33456	N/A	5.58	5.72	5.91	6.57	6.91	7.54	7.82	7.97	N/A	8.18	1991-08-06	1
1	1	1	1	1	8.17		8.17	8.17	8.17	8.17	8.17	8.17	8.17	8.17	8.17	8.17	8.17	1.45531	2.05203		33457	N/A	5.55	5.69	5.85	6.54	6.9	7.51	7.8	7.93	N/A	8.17	1991-08-07	1
1	1	1	1	1	8.22		8.22	8.22	8.22	8.22	8.22	8.22	8.22	8.22	8.22	8.22	8.22	1.50171	2.11594		33458	N/A	5.54	5.66	5.82	6.52	6.9	7.53	7.84	7.98	N/A	8.22	1991-08-08	1
1	1	1	1	1	8.23		8.23	8.23	8.23	8.23	8.23	8.23	8.23	8.23	8.23	8.23	8.23	1.53543	2.15903		33459	N/A	5.48	5.62	5.8	6.49	6.86	7.51	7.82	7.98	N/A	8.23	1991-08-09	1
1	1	1	1	1	8.21		8.21	8.21	8.21	8.21	8.21	8.21	8.21	8.21	8.21	8.21	8.21	1.52349	2.14138		33462	N/A	5.48	5.62	5.8	6.49	6.85	7.49	7.8	7.95	N/A	8.21	1991-08-12	1
1	1	1	1	1	8.17		8.17	8.17	8.17	8.17	8.17	8.17	8.17	8.17	8.17	8.17	8.17	1.50094	2.11056		33463	N/A	5.45	5.64	5.8	6.48	6.84	7.46	7.76	7.91	N/A	8.17	1991-08-13	1
1	1	1	1	1	8.08		8.08	8.08	8.08	8.08	8.08	8.08	8.08	8.08	8.08	8.08	8.08	1.48241	2.08114		33464	N/A	5.45	5.6	5.7	6.37	6.75	7.37	7.66	7.82	N/A	8.08	1991-08-14	1
1	1	1	1	1	8.09		8.09	8.09	8.09	8.09	8.09	8.09	8.09	8.09	8.09	8.09	8.09	1.49908	2.10337		33465	N/A	5.46	5.59	5.67	6.33	6.73	7.37	7.68	7.84	N/A	8.09	1991-08-15	1
1	1	1	1	1	8.09		8.09	8.09	8.09	8.09	8.09	8.09	8.09	8.09	8.09	8.09	8.09	1.5237	2.13323		33466	N/A	5.42	5.54	5.65	6.31	6.69	7.33	7.66	7.84	N/A	8.09	1991-08-16	1
1	1	1	1	1	8.11		8.11	8.11	8.11	8.11	8.11	8.11	8.11	8.11	8.11	8.11	8.11	1.6117	2.25624		33469	N/A	5.27	5.43	5.52	6.24	6.63	7.31	7.65	7.83	N/A	8.11	1991-08-19	1
1	1	1	1	1	8.09		8.09	8.09	8.09	8.09	8.09	8.09	8.09	8.09	8.09	8.09	8.09	1.6328	2.28101		33470	N/A	5.26	5.35	5.48	6.17	6.58	7.24	7.61	7.81	N/A	8.09	1991-08-20	1
1	1	1	1	1	8.07		8.07	8.07	8.07	8.07	8.07	8.07	8.07	8.07	8.07	8.07	8.07	1.52363	2.12664		33471	N/A	5.44	5.52	5.63	6.27	6.65	7.27	7.63	7.8	N/A	8.07	1991-08-21	1
1	1	1	1	1	8.05		8.05	8.05	8.05	8.05	8.05	8.05	8.05	8.05	8.05	8.05	8.05	1.49555	2.08504		33472	N/A	5.47	5.56	5.66	6.27	6.65	7.25	7.61	7.78	N/A	8.05	1991-08-22	1
1	1	1	1	1	8.13		8.13	8.13	8.13	8.13	8.13	8.13	8.13	8.13	8.13	8.13	8.13	1.45212	2.0291		33473	N/A	5.56	5.71	5.82	6.46	6.78	7.39	7.71	7.88	N/A	8.13	1991-08-23	1
1	1	1	1	1	8.15		8.15	8.15	8.15	8.15	8.15	8.15	8.15	8.15	8.15	8.15	8.15	1.44933	2.02922		33476	N/A	5.58	5.72	5.85	6.48	6.81	7.44	7.75	7.91	N/A	8.15	1991-08-26	1
1	1	1	1	1	8.14		8.14	8.14	8.14	8.14	8.14	8.14	8.14	8.14	8.14	8.14	8.14	1.4732	2.0605		33477	N/A	5.55	5.68	5.8	6.41	6.76	7.42	7.74	7.89	N/A	8.14	1991-08-27	1
1	1	1	1	1	8.06		8.06	8.06	8.06	8.06	8.06	8.06	8.06	8.06	8.06	8.06	8.06	1.49342	2.08672		33478	N/A	5.46	5.56	5.68	6.3	6.65	7.32	7.65	7.82	N/A	8.06	1991-08-28	1
1	1	1	1	1	7.99		7.99	7.99	7.99	7.99	7.99	7.99	7.99	7.99	7.99	7.99	7.99	1.47283	2.05467		33479	N/A	5.43	5.53	5.65	6.25	6.59	7.24	7.58	7.74	N/A	7.99	1991-08-29	1
1	1	1	1	1	8.06		8.06	8.06	8.06	8.06	8.06	8.06	8.06	8.06	8.06	8.06	8.06	1.46643	2.05047		33480	N/A	5.49	5.6	5.72	6.36	6.68	7.34	7.67	7.82	N/A	8.06	1991-08-30	1
1	1	1	1	1	8.05		8.05	8.05	8.05	8.05	8.05	8.05	8.05	8.05	8.05	8.05	8.05	1.45975	2.03924		33484	N/A	5.51	5.61	5.72	6.33	6.67	7.32	7.66	7.81	N/A	8.05	1991-09-03	1
1	1	1	1	1	8.06		8.06	8.06	8.06	8.06	8.06	8.06	8.06	8.06	8.06	8.06	8.06	1.47431	2.05876		33485	N/A	5.49	5.61	5.71	6.31	6.67	7.31	7.66	7.81	N/A	8.06	1991-09-04	1
1	1	1	1	1	8.09		8.09	8.09	8.09	8.09	8.09	8.09	8.09	8.09	8.09	8.09	8.09	1.49692	2.08784		33486	N/A	5.48	5.61	5.71	6.31	6.67	7.32	7.67	7.83	N/A	8.09	1991-09-05	1
1	1	1	1	1	8.02		8.02	8.02	8.02	8.02	8.02	8.02	8.02	8.02	8.02	8.02	8.02	1.48273	2.06741		33487	N/A	5.45	5.56	5.65	6.26	6.62	7.24	7.6	7.76	N/A	8.02	1991-09-06	1
1	1	1	1	1	8		8	8	8	8	8	8	8	8	8	8	8	1.49004	2.07362		33490	N/A	5.44	5.53	5.61	6.23	6.58	7.2	7.56	7.73	N/A	8	1991-09-09	1
1	1	1	1	1	8.01		8.01	8.01	8.01	8.01	8.01	8.01	8.01	8.01	8.01	8.01	8.01	1.51218	2.10535		33491	N/A	5.4	5.49	5.61	6.21	6.58	7.2	7.55	7.73	N/A	8.01	1991-09-10	1
1	1	1	1	1	8.02		8.02	8.02	8.02	8.02	8.02	8.02	8.02	8.02	8.02	8.02	8.02	1.51184	2.10345		33492	N/A	5.42	5.5	5.61	6.23	6.58	7.21	7.56	7.74	N/A	8.02	1991-09-11	1
1	1	1	1	1	7.96		7.96	7.96	7.96	7.96	7.96	7.96	7.96	7.96	7.96	7.96	7.96	1.49827	2.08394		33493	N/A	5.38	5.47	5.56	6.2	6.53	7.15	7.52	7.67	N/A	7.96	1991-09-12	1
1	1	1	1	1	7.95		7.95	7.95	7.95	7.95	7.95	7.95	7.95	7.95	7.95	7.95	7.95	1.51989	2.1147		33494	N/A	5.31	5.42	5.53	6.18	6.51	7.13	7.48	7.66	N/A	7.95	1991-09-13	1
1	1	1	1	1	7.93		7.93	7.93	7.93	7.93	7.93	7.93	7.93	7.93	7.93	7.93	7.93	1.49902	2.08184		33497	N/A	5.34	5.44	5.55	6.17	6.5	7.11	7.44	7.63	N/A	7.93	1991-09-16	1
1	1	1	1	1	7.92		7.92	7.92	7.92	7.92	7.92	7.92	7.92	7.92	7.92	7.92	7.92	1.48546	2.06173		33498	N/A	5.35	5.46	5.56	6.18	6.5	7.1	7.43	7.62	N/A	7.92	1991-09-17	1
1	1	1	1	1	7.92		7.92	7.92	7.92	7.92	7.92	7.92	7.92	7.92	7.92	7.92	7.92	1.49029	2.06662		33499	N/A	5.34	5.45	5.56	6.18	6.48	7.1	7.43	7.62	N/A	7.92	1991-09-18	1
1	1	1	1	1	7.92		7.92	7.92	7.92	7.92	7.92	7.92	7.92	7.92	7.92	7.92	7.92	1.47727	2.04424		33500	N/A	5.36	5.48	5.59	6.2	6.47	7.1	7.43	7.61	N/A	7.92	1991-09-19	1
1	1	1	1	1	7.89		7.89	7.89	7.89	7.89	7.89	7.89	7.89	7.89	7.89	7.89	7.89	1.4707	2.03508		33501	N/A	5.35	5.47	5.55	6.18	6.44	7.09	7.4	7.57	N/A	7.89	1991-09-20	1
1	1	1	1	1	7.88		7.88	7.88	7.88	7.88	7.88	7.88	7.88	7.88	7.88	7.88	7.88	1.46544	2.02524		33504	N/A	5.37	5.47	5.54	6.17	6.42	7.09	7.38	7.55	N/A	7.88	1991-09-23	1
1	1	1	1	1	7.89		7.89	7.89	7.89	7.89	7.89	7.89	7.89	7.89	7.89	7.89	7.89	1.48689	2.05667		33505	N/A	5.33	5.46	5.54	6.11	6.42	7.09	7.38	7.56	N/A	7.89	1991-09-24	1
1	1	1	1	1	7.91		7.91	7.91	7.91	7.91	7.91	7.91	7.91	7.91	7.91	7.91	7.91	1.50418	2.07733		33506	N/A	5.33	5.45	5.53	6.12	6.42	7.06	7.4	7.58	N/A	7.91	1991-09-25	1
1	1	1	1	1	7.89		7.89	7.89	7.89	7.89	7.89	7.89	7.89	7.89	7.89	7.89	7.89	1.52954	2.1097		33507	N/A	5.28	5.4	5.47	6.05	6.35	7.03	7.38	7.56	N/A	7.89	1991-09-26	1
1	1	1	1	1	7.83		7.83	7.83	7.83	7.83	7.83	7.83	7.83	7.83	7.83	7.83	7.83	1.51088	2.08036		33508	N/A	5.28	5.36	5.43	6.02	6.31	6.95	7.31	7.49	N/A	7.83	1991-09-27	1
1	1	1	1	1	7.82		7.82	7.82	7.82	7.82	7.82	7.82	7.82	7.82	7.82	7.82	7.82	1.51951	2.08868		33511	N/A	5.26	5.34	5.42	5.99	6.28	6.92	7.29	7.47	N/A	7.82	1991-09-30	1
1	1	1	1	1	7.81		7.81	7.81	7.81	7.81	7.81	7.81	7.81	7.81	7.81	7.81	7.81	1.51602	2.07989		33512	N/A	5.25	5.35	5.42	5.99	6.26	6.9	7.27	7.45	N/A	7.81	1991-10-01	1
1	1	1	1	1	7.83		7.83	7.83	7.83	7.83	7.83	7.83	7.83	7.83	7.83	7.83	7.83	1.52476	2.0931		33513	N/A	5.24	5.37	5.43	5.99	6.29	6.9	7.28	7.47	N/A	7.83	1991-10-02	1
1	1	1	1	1	7.84		7.84	7.84	7.84	7.84	7.84	7.84	7.84	7.84	7.84	7.84	7.84	1.5582	2.1347		33514	N/A	5.19	5.33	5.39	5.98	6.25	6.88	7.26	7.47	N/A	7.84	1991-10-03	1
1	1	1	1	1	7.79		7.79	7.79	7.79	7.79	7.79	7.79	7.79	7.79	7.79	7.79	7.79	1.55572	2.12614		33515	N/A	5.17	5.29	5.35	5.91	6.2	6.81	7.18	7.39	N/A	7.79	1991-10-04	1
1	1	1	1	1	7.79		7.79	7.79	7.79	7.79	7.79	7.79	7.79	7.79	7.79	7.79	7.79	1.55031	2.1178		33518	N/A	5.18	5.3	5.35	5.93	6.2	6.81	7.18	7.4	N/A	7.79	1991-10-07	1
1	1	1	1	1	7.82		7.82	7.82	7.82	7.82	7.82	7.82	7.82	7.82	7.82	7.82	7.82	1.57949	2.15635		33519	N/A	5.17	5.29	5.35	5.89	6.19	6.82	7.2	7.43	N/A	7.82	1991-10-08	1
1	1	1	1	1	7.91		7.91	7.91	7.91	7.91	7.91	7.91	7.91	7.91	7.91	7.91	7.91	1.63527	2.23169		33520	N/A	5.16	5.28	5.36	5.93	6.23	6.87	7.24	7.51	N/A	7.91	1991-10-09	1
1	1	1	1	1	7.98		7.98	7.98	7.98	7.98	7.98	7.98	7.98	7.98	7.98	7.98	7.98	1.65913	2.26859		33521	N/A	5.18	5.29	5.4	5.98	6.3	6.93	7.3	7.58	N/A	7.98	1991-10-10	1
1	1	1	1	1	7.9		7.9	7.9	7.9	7.9	7.9	7.9	7.9	7.9	7.9	7.9	7.9	1.64951	2.24996		33522	N/A	5.14	5.23	5.33	5.91	6.22	6.84	7.19	7.49	N/A	7.9	1991-10-11	1
1	1	1	1	1	7.87		7.87	7.87	7.87	7.87	7.87	7.87	7.87	7.87	7.87	7.87	7.87	1.64866	2.24557		33526	N/A	5.13	5.24	5.28	5.85	6.17	6.81	7.16	7.46	N/A	7.87	1991-10-15	1
1	1	1	1	1	7.88		7.88	7.88	7.88	7.88	7.88	7.88	7.88	7.88	7.88	7.88	7.88	1.66285	2.26211		33527	N/A	5.12	5.22	5.27	5.86	6.17	6.79	7.15	7.45	N/A	7.88	1991-10-16	1
1	1	1	1	1	8		8	8	8	8	8	8	8	8	8	8	8	1.69364	2.30218		33528	N/A	5.18	5.28	5.38	5.93	6.25	6.9	7.24	7.55	N/A	8	1991-10-17	1
1	1	1	1	1	7.97		7.97	7.97	7.97	7.97	7.97	7.97	7.97	7.97	7.97	7.97	7.97	1.67044	2.26967		33529	N/A	5.18	5.28	5.39	5.95	6.24	6.88	7.22	7.53	N/A	7.97	1991-10-18	1
1	1	1	1	1	8.06		8.06	8.06	8.06	8.06	8.06	8.06	8.06	8.06	8.06	8.06	8.06	1.70395	2.31677		33532	N/A	5.19	5.34	5.43	5.99	6.3	6.95	7.3	7.62	N/A	8.06	1991-10-21	1
1	1	1	1	1	8.1		8.1	8.1	8.1	8.1	8.1	8.1	8.1	8.1	8.1	8.1	8.1	1.717	2.33737		33533	N/A	5.21	5.35	5.44	6.02	6.33	6.99	7.35	7.67	N/A	8.1	1991-10-22	1
1	1	1	1	1	8.09		8.09	8.09	8.09	8.09	8.09	8.09	8.09	8.09	8.09	8.09	8.09	1.71562	2.34448		33534	N/A	5.19	5.33	5.42	6.01	6.35	7	7.37	7.69	N/A	8.09	1991-10-23	1
1	1	1	1	1	8.03		8.03	8.03	8.03	8.03	8.03	8.03	8.03	8.03	8.03	8.03	8.03	1.73226	2.36434		33535	N/A	5.12	5.25	5.32	5.93	6.25	6.91	7.33	7.65	N/A	8.03	1991-10-24	1
1	1	1	1	1	8.05		8.05	8.05	8.05	8.05	8.05	8.05	8.05	8.05	8.05	8.05	8.05	1.7416	2.38457		33536	N/A	5.11	5.25	5.32	5.93	6.28	6.96	7.36	7.68	N/A	8.05	1991-10-25	1
1	1	1	1	1	8.03		8.03	8.03	8.03	8.03	8.03	8.03	8.03	8.03	8.03	8.03	8.03	1.75524	2.39927		33539	N/A	5.09	5.2	5.29	5.88	6.24	6.91	7.32	7.65	N/A	8.03	1991-10-28	1
1	1	1	1	1	7.91		7.91	7.91	7.91	7.91	7.91	7.91	7.91	7.91	7.91	7.91	7.91	1.73209	2.36466		33540	N/A	5.03	5.13	5.19	5.78	6.14	6.8	7.19	7.51	N/A	7.91	1991-10-29	1
1	1	1	1	1	7.9		7.9	7.9	7.9	7.9	7.9	7.9	7.9	7.9	7.9	7.9	7.9	1.75958	2.40487		33541	N/A	4.98	5.07	5.13	5.73	6.12	6.77	7.18	7.48	N/A	7.9	1991-10-30	1
1	1	1	1	1	7.91		7.91	7.91	7.91	7.91	7.91	7.91	7.91	7.91	7.91	7.91	7.91	1.7924	2.44037		33542	N/A	4.96	5.03	5.1	5.7	6.06	6.74	7.15	7.47	N/A	7.91	1991-10-31	1
1	1	1	1	1	7.93		7.93	7.93	7.93	7.93	7.93	7.93	7.93	7.93	7.93	7.93	7.93	1.84599	2.51207		33543	N/A	4.89	4.98	5.03	5.65	6.02	6.71	7.16	7.48	N/A	7.93	1991-11-01	1
1	1	1	1	1	7.95		7.95	7.95	7.95	7.95	7.95	7.95	7.95	7.95	7.95	7.95	7.95	1.86108	2.53589		33546	N/A	4.88	4.99	5.02	5.63	6.03	6.74	7.18	7.5	N/A	7.95	1991-11-04	1
1	1	1	1	1	8.02		8.02	8.02	8.02	8.02	8.02	8.02	8.02	8.02	8.02	8.02	8.02	1.88729	2.56435		33547	N/A	4.9	5.01	5.07	5.7	6.04	6.79	7.21	7.56	N/A	8.02	1991-11-05	1
1	1	1	1	1	8.01		8.01	8.01	8.01	8.01	8.01	8.01	8.01	8.01	8.01	8.01	8.01	1.95263	2.65112		33548	N/A	4.76	4.89	4.98	5.63	5.97	6.72	7.16	7.51	N/A	8.01	1991-11-06	1
1	1	1	1	1	7.92		7.92	7.92	7.92	7.92	7.92	7.92	7.92	7.92	7.92	7.92	7.92	1.9002	2.57988		33549	N/A	4.76	4.88	4.96	5.62	5.95	6.65	7.08	7.43	N/A	7.92	1991-11-07	1
1	1	1	1	1	7.88		7.88	7.88	7.88	7.88	7.88	7.88	7.88	7.88	7.88	7.88	7.88	1.86892	2.54503		33550	N/A	4.75	4.88	4.96	5.63	5.96	6.66	7.08	7.41	N/A	7.88	1991-11-08	1
1	1	1	1	1	7.8		7.8	7.8	7.8	7.8	7.8	7.8	7.8	7.8	7.8	7.8	7.8	1.80007	2.45861		33554	N/A	4.77	4.89	4.98	5.65	5.97	6.65	7.05	7.37	N/A	7.8	1991-11-12	1
1	1	1	1	1	7.88		7.88	7.88	7.88	7.88	7.88	7.88	7.88	7.88	7.88	7.88	7.88	1.84978	2.52297		33555	N/A	4.76	4.89	5.02	5.65	6	6.69	7.08	7.41	N/A	7.88	1991-11-13	1
1	1	1	1	1	7.82		7.82	7.82	7.82	7.82	7.82	7.82	7.82	7.82	7.82	7.82	7.82	1.83807	2.50162		33556	N/A	4.76	4.86	4.95	5.6	5.93	6.62	7.02	7.35	N/A	7.82	1991-11-14	1
1	1	1	1	1	7.84		7.84	7.84	7.84	7.84	7.84	7.84	7.84	7.84	7.84	7.84	7.84	1.89064	2.56546		33557	N/A	4.72	4.81	4.89	5.54	5.88	6.58	6.99	7.33	N/A	7.84	1991-11-15	1
1	1	1	1	1	7.84		7.84	7.84	7.84	7.84	7.84	7.84	7.84	7.84	7.84	7.84	7.84	1.8906	2.56374		33560	N/A	4.71	4.82	4.89	5.55	5.88	6.57	6.98	7.33	N/A	7.84	1991-11-18	1
1	1	1	1	1	7.9		7.9	7.9	7.9	7.9	7.9	7.9	7.9	7.9	7.9	7.9	7.9	1.97307	2.66859		33561	N/A	4.66	4.74	4.84	5.5	5.83	6.55	6.99	7.37	N/A	7.9	1991-11-19	1
1	1	1	1	1	7.92		7.92	7.92	7.92	7.92	7.92	7.92	7.92	7.92	7.92	7.92	7.92	1.99248	2.69719		33562	N/A	4.62	4.73	4.83	5.52	5.84	6.56	7.01	7.38	N/A	7.92	1991-11-20	1
1	1	1	1	1	7.96		7.96	7.96	7.96	7.96	7.96	7.96	7.96	7.96	7.96	7.96	7.96	2.054	2.77655		33563	N/A	4.56	4.68	4.77	5.5	5.82	6.54	6.99	7.39	N/A	7.96	1991-11-21	1
1	1	1	1	1	7.99		7.99	7.99	7.99	7.99	7.99	7.99	7.99	7.99	7.99	7.99	7.99	2.08023	2.81438		33564	N/A	4.55	4.67	4.75	5.49	5.82	6.56	7.02	7.44	N/A	7.99	1991-11-22	1
1	1	1	1	1	7.99		7.99	7.99	7.99	7.99	7.99	7.99	7.99	7.99	7.99	7.99	7.99	2.06467	2.80335		33567	N/A	4.55	4.68	4.78	5.5	5.86	6.61	7.06	7.45	N/A	7.99	1991-11-25	1
1	1	1	1	1	7.95		7.95	7.95	7.95	7.95	7.95	7.95	7.95	7.95	7.95	7.95	7.95	2.06667	2.80276		33568	N/A	4.52	4.63	4.75	5.45	5.81	6.53	7.04	7.42	N/A	7.95	1991-11-26	1
1	1	1	1	1	7.97		7.97	7.97	7.97	7.97	7.97	7.97	7.97	7.97	7.97	7.97	7.97	2.08996	2.8312		33569	N/A	4.51	4.62	4.74	5.43	5.8	6.53	7.03	7.42	N/A	7.97	1991-11-27	1
1	1	1	1	1	7.94		7.94	7.94	7.94	7.94	7.94	7.94	7.94	7.94	7.94	7.94	7.94	2.10225	2.84654		33571	N/A	4.47	4.57	4.69	5.38	5.76	6.48	6.99	7.38	N/A	7.94	1991-11-29	1
1	1	1	1	1	7.92		7.92	7.92	7.92	7.92	7.92	7.92	7.92	7.92	7.92	7.92	7.92	2.10211	2.83279		33574	N/A	4.51	4.56	4.68	5.33	5.71	6.43	6.91	7.32	N/A	7.92	1991-12-02	1
1	1	1	1	1	7.9		7.9	7.9	7.9	7.9	7.9	7.9	7.9	7.9	7.9	7.9	7.9	2.11514	2.8458		33575	N/A	4.48	4.53	4.64	5.29	5.67	6.39	6.86	7.28	N/A	7.9	1991-12-03	1
1	1	1	1	1	7.84		7.84	7.84	7.84	7.84	7.84	7.84	7.84	7.84	7.84	7.84	7.84	2.12342	2.84295		33576	N/A	4.43	4.47	4.59	5.22	5.59	6.27	6.74	7.17	N/A	7.84	1991-12-04	1
1	1	1	1	1	7.86		7.86	7.86	7.86	7.86	7.86	7.86	7.86	7.86	7.86	7.86	7.86	2.13023	2.8561		33577	N/A	4.43	4.48	4.6	5.22	5.6	6.3	6.78	7.21	N/A	7.86	1991-12-05	1
1	1	1	1	1	7.78		7.78	7.78	7.78	7.78	7.78	7.78	7.78	7.78	7.78	7.78	7.78	2.10496	2.847		33578	N/A	4.36	4.38	4.53	5.19	5.58	6.31	6.81	7.26	N/A	7.78	1991-12-06	1
1	1	1	1	1	7.78		7.78	7.78	7.78	7.78	7.78	7.78	7.78	7.78	7.78	7.78	7.78	2.16609	2.91699		33581	N/A	4.28	4.33	4.44	5.09	5.48	6.23	6.75	7.22	N/A	7.78	1991-12-09	1
1	1	1	1	1	7.79		7.79	7.79	7.79	7.79	7.79	7.79	7.79	7.79	7.79	7.79	7.79	2.16065	2.90608		33582	N/A	4.32	4.36	4.47	5.07	5.48	6.25	6.75	7.21	N/A	7.79	1991-12-10	1
1	1	1	1	1	7.81		7.81	7.81	7.81	7.81	7.81	7.81	7.81	7.81	7.81	7.81	7.81	2.1981	2.9556		33583	N/A	4.26	4.32	4.46	5.04	5.44	6.26	6.76	7.22	N/A	7.81	1991-12-11	1
1	1	1	1	1	7.77		7.77	7.77	7.77	7.77	7.77	7.77	7.77	7.77	7.77	7.77	7.77	2.17493	2.92538		33584	N/A	4.26	4.32	4.42	5.06	5.43	6.23	6.74	7.19	N/A	7.77	1991-12-12	1
1	1	1	1	1	7.79		7.79	7.79	7.79	7.79	7.79	7.79	7.79	7.79	7.79	7.79	7.79	2.17394	2.93299		33585	N/A	4.26	4.33	4.43	5.09	5.46	6.3	6.79	7.22	N/A	7.79	1991-12-13	1
1	1	1	1	1	7.77		7.77	7.77	7.77	7.77	7.77	7.77	7.77	7.77	7.77	7.77	7.77	2.16721	2.92308		33588	N/A	4.25	4.34	4.42	5.06	5.44	6.28	6.78	7.21	N/A	7.77	1991-12-16	1
1	1	1	1	1	7.75		7.75	7.75	7.75	7.75	7.75	7.75	7.75	7.75	7.75	7.75	7.75	2.17862	2.93379		33589	N/A	4.22	4.32	4.38	5.02	5.39	6.24	6.75	7.18	N/A	7.75	1991-12-17	1
1	1	1	1	1	7.76		7.76	7.76	7.76	7.76	7.76	7.76	7.76	7.76	7.76	7.76	7.76	2.14986	2.90289		33590	N/A	4.23	4.35	4.44	5.11	5.46	6.3	6.78	7.19	N/A	7.76	1991-12-18	1
1	1	1	1	1	7.68		7.68	7.68	7.68	7.68	7.68	7.68	7.68	7.68	7.68	7.68	7.68	2.13924	2.8877		33591	N/A	4.15	4.29	4.39	5.05	5.4	6.19	6.73	7.11	N/A	7.68	1991-12-19	1
1	1	1	1	1	7.59		7.59	7.59	7.59	7.59	7.59	7.59	7.59	7.59	7.59	7.59	7.59	2.26737	3.06559		33592	N/A	3.84	3.98	4.11	4.8	5.2	6.02	6.59	6.97	N/A	7.59	1991-12-20	1
1	1	1	1	1	7.53		7.53	7.53	7.53	7.53	7.53	7.53	7.53	7.53	7.53	7.53	7.53	2.2203	2.99512		33595	N/A	3.87	4.01	4.13	4.79	5.17	6	6.51	6.88	N/A	7.53	1991-12-23	1
1	1	1	1	1	7.53		7.53	7.53	7.53	7.53	7.53	7.53	7.53	7.53	7.53	7.53	7.53	2.1979	2.96254		33596	N/A	3.91	4.02	4.18	4.84	5.18	6.01	6.53	6.88	N/A	7.53	1991-12-24	1
1	1	1	1	1	7.51		7.51	7.51	7.51	7.51	7.51	7.51	7.51	7.51	7.51	7.51	7.51	2.1759	2.92877		33598	N/A	3.92	4.06	4.19	4.85	5.17	6	6.51	6.85	N/A	7.51	1991-12-26	1
1	1	1	1	1	7.52		7.52	7.52	7.52	7.52	7.52	7.52	7.52	7.52	7.52	7.52	7.52	2.1881	2.93966		33599	N/A	3.96	4.02	4.18	4.85	5.15	6	6.5	6.82	N/A	7.52	1991-12-27	1
1	1	1	1	1	7.45		7.45	7.45	7.45	7.45	7.45	7.45	7.45	7.45	7.45	7.45	7.45	2.15062	2.89323		33602	N/A	3.97	4.02	4.14	4.8	5.14	5.97	6.44	6.76	N/A	7.45	1991-12-30	1
1	1	1	1	1	7.41		7.41	7.41	7.41	7.41	7.41	7.41	7.41	7.41	7.41	7.41	7.41	2.13958	2.87487		33603	N/A	3.96	4	4.12	4.77	5.11	5.93	6.38	6.71	N/A	7.41	1991-12-31	1
1	1	1	1	1	7.46		7.46	7.46	7.46	7.46	7.46	7.46	7.46	7.46	7.46	7.46	7.46	2.16499	2.9147		33605	N/A	3.96	4.01	4.13	4.77	5.13	5.98	6.46	6.78	N/A	7.46	1992-01-02	1
1	1	1	1	1	7.48		7.48	7.48	7.48	7.48	7.48	7.48	7.48	7.48	7.48	7.48	7.48	2.15758	2.92018		33606	N/A	3.95	4.02	4.16	4.8	5.19	6.05	6.54	6.85	N/A	7.48	1992-01-03	1
1	1	1	1	1	7.44		7.44	7.44	7.44	7.44	7.44	7.44	7.44	7.44	7.44	7.44	7.44	2.15873	2.92252		33609	N/A	3.92	3.96	4.12	4.76	5.14	6.02	6.51	6.82	N/A	7.44	1992-01-06	1
1	1	1	1	1	7.39		7.39	7.39	7.39	7.39	7.39	7.39	7.39	7.39	7.39	7.39	7.39	2.17469	2.93909		33610	N/A	3.85	3.93	4.03	4.67	5.06	5.94	6.44	6.76	N/A	7.39	1992-01-07	1
1	1	1	1	1	7.41		7.41	7.41	7.41	7.41	7.41	7.41	7.41	7.41	7.41	7.41	7.41	2.20455	2.97989		33611	N/A	3.82	3.9	4	4.66	5.05	5.96	6.42	6.77	N/A	7.41	1992-01-08	1
1	1	1	1	1	7.42		7.42	7.42	7.42	7.42	7.42	7.42	7.42	7.42	7.42	7.42	7.42	2.16285	2.93099		33612	N/A	3.87	3.96	4.05	4.77	5.13	6.02	6.47	6.79	N/A	7.42	1992-01-09	1
1	1	1	1	1	7.47		7.47	7.47	7.47	7.47	7.47	7.47	7.47	7.47	7.47	7.47	7.47	2.15293	2.92566		33613	N/A	3.92	4	4.11	4.85	5.22	6.1	6.54	6.85	N/A	7.47	1992-01-10	1
1	1	1	1	1	7.49		7.49	7.49	7.49	7.49	7.49	7.49	7.49	7.49	7.49	7.49	7.49	2.1257	2.91073		33616	N/A	3.92	4.02	4.17	4.93	5.34	6.21	6.62	6.92	N/A	7.49	1992-01-13	1
1	1	1	1	1	7.54		7.54	7.54	7.54	7.54	7.54	7.54	7.54	7.54	7.54	7.54	7.54	2.13508	2.94759		33617	N/A	3.92	4.01	4.16	5	5.44	6.34	6.77	7.03	N/A	7.54	1992-01-14	1
1	1	1	1	1	7.57		7.57	7.57	7.57	7.57	7.57	7.57	7.57	7.57	7.57	7.57	7.57	2.12651	2.93393		33618	N/A	3.94	4.05	4.22	5.07	5.48	6.37	6.78	7.05	N/A	7.57	1992-01-15	1
1	1	1	1	1	7.65		7.65	7.65	7.65	7.65	7.65	7.65	7.65	7.65	7.65	7.65	7.65	2.19618	3.03354		33619	N/A	3.89	4.02	4.18	5.07	5.51	6.41	6.84	7.13	N/A	7.65	1992-01-16	1
1	1	1	1	1	7.61		7.61	7.61	7.61	7.61	7.61	7.61	7.61	7.61	7.61	7.61	7.61	2.18613	3.01581		33620	N/A	3.89	4.02	4.14	5.02	5.46	6.36	6.81	7.09	N/A	7.61	1992-01-17	1
1	1	1	1	1	7.57		7.57	7.57	7.57	7.57	7.57	7.57	7.57	7.57	7.57	7.57	7.57	2.19773	3.01745		33624	N/A	3.86	3.97	4.1	4.97	5.36	6.27	6.71	7.03	N/A	7.57	1992-01-21	1
1	1	1	1	1	7.62		7.62	7.62	7.62	7.62	7.62	7.62	7.62	7.62	7.62	7.62	7.62	2.23269	3.06773		33625	N/A	3.85	3.97	4.1	4.95	5.4	6.28	6.74	7.09	N/A	7.62	1992-01-22	1
1	1	1	1	1	7.71		7.71	7.71	7.71	7.71	7.71	7.71	7.71	7.71	7.71	7.71	7.71	2.26349	3.11667		33626	N/A	3.87	3.98	4.15	5.02	5.51	6.32	6.84	7.2	N/A	7.71	1992-01-23	1
1	1	1	1	1	7.71		7.71	7.71	7.71	7.71	7.71	7.71	7.71	7.71	7.71	7.71	7.71	2.20675	3.05283		33627	N/A	3.91	4.06	4.22	5.13	5.62	6.4	6.89	7.25	N/A	7.71	1992-01-24	1
1	1	1	1	1	7.71		7.71	7.71	7.71	7.71	7.71	7.71	7.71	7.71	7.71	7.71	7.71	2.19369	3.03752		33630	N/A	3.93	4.07	4.24	5.15	5.66	6.41	6.88	7.24	N/A	7.71	1992-01-27	1
1	1	1	1	1	7.66		7.66	7.66	7.66	7.66	7.66	7.66	7.66	7.66	7.66	7.66	7.66	2.18636	3.01563		33631	N/A	3.93	4.05	4.2	5.1	5.58	6.32	6.8	7.16	N/A	7.66	1992-01-28	1
1	1	1	1	1	7.75		7.75	7.75	7.75	7.75	7.75	7.75	7.75	7.75	7.75	7.75	7.75	2.22	3.07009		33632	N/A	3.96	4.07	4.22	5.15	5.67	6.42	6.89	7.25	N/A	7.75	1992-01-29	1
1	1	1	1	1	7.79		7.79	7.79	7.79	7.79	7.79	7.79	7.79	7.79	7.79	7.79	7.79	2.24048	3.10499		33633	N/A	3.93	4.07	4.24	5.17	5.71	6.48	6.93	7.31	N/A	7.79	1992-01-30	1
1	1	1	1	1	7.77		7.77	7.77	7.77	7.77	7.77	7.77	7.77	7.77	7.77	7.77	7.77	2.23939	3.09729		33634	N/A	3.94	4.07	4.23	5.11	5.65	6.44	6.92	7.31	N/A	7.77	1992-01-31	1
1	1	1	1	1	7.82		7.82	7.82	7.82	7.82	7.82	7.82	7.82	7.82	7.82	7.82	7.82	2.25774	3.13223		33637	N/A	3.96	4.06	4.23	5.15	5.72	6.52	6.98	7.36	N/A	7.82	1992-02-03	1
1	1	1	1	1	7.76		7.76	7.76	7.76	7.76	7.76	7.76	7.76	7.76	7.76	7.76	7.76	2.23616	3.09848		33638	N/A	3.94	4.04	4.21	5.12	5.67	6.46	6.91	7.29	N/A	7.76	1992-02-04	1
1	1	1	1	1	7.74		7.74	7.74	7.74	7.74	7.74	7.74	7.74	7.74	7.74	7.74	7.74	2.24258	3.09173		33639	N/A	3.94	4.03	4.21	5.07	5.59	6.4	6.83	7.21	N/A	7.74	1992-02-05	1
1	1	1	1	1	7.75		7.75	7.75	7.75	7.75	7.75	7.75	7.75	7.75	7.75	7.75	7.75	2.26346	3.11612		33640	N/A	3.91	4.02	4.2	5.05	5.56	6.4	6.81	7.2	N/A	7.75	1992-02-06	1
1	1	1	1	1	7.77		7.77	7.77	7.77	7.77	7.77	7.77	7.77	7.77	7.77	7.77	7.77	2.33212	3.21174		33641	N/A	3.84	3.92	4.1	4.97	5.51	6.4	6.8	7.2	N/A	7.77	1992-02-07	1
1	1	1	1	1	7.79		7.79	7.79	7.79	7.79	7.79	7.79	7.79	7.79	7.79	7.79	7.79	2.35382	3.23938		33644	N/A	3.83	3.93	4.08	4.94	5.52	6.38	6.79	7.21	N/A	7.79	1992-02-10	1
1	1	1	1	1	7.79		7.79	7.79	7.79	7.79	7.79	7.79	7.79	7.79	7.79	7.79	7.79	2.32676	3.19897		33645	N/A	3.85	3.97	4.14	5.01	5.51	6.4	6.82	7.23	N/A	7.79	1992-02-11	1
1	1	1	1	1	7.81		7.81	7.81	7.81	7.81	7.81	7.81	7.81	7.81	7.81	7.81	7.81	2.321	3.20008		33646	N/A	3.85	3.97	4.16	5.08	5.55	6.46	6.88	7.3	N/A	7.81	1992-02-12	1
1	1	1	1	1	7.92		7.92	7.92	7.92	7.92	7.92	7.92	7.92	7.92	7.92	7.92	7.92	2.33027	3.22672		33647	N/A	3.89	4.03	4.26	5.22	5.72	6.61	7	7.4	N/A	7.92	1992-02-13	1
1	1	1	1	1	7.91		7.91	7.91	7.91	7.91	7.91	7.91	7.91	7.91	7.91	7.91	7.91	2.30113	3.19359		33648	N/A	3.89	4.04	4.32	5.27	5.76	6.65	7.02	7.41	N/A	7.91	1992-02-14	1
1	1	1	1	1	7.97		7.97	7.97	7.97	7.97	7.97	7.97	7.97	7.97	7.97	7.97	7.97	2.33239	3.23426		33652	N/A	3.93	4.08	4.31	5.24	5.77	6.69	7.07	7.47	N/A	7.97	1992-02-18	1
1	1	1	1	1	7.93		7.93	7.93	7.93	7.93	7.93	7.93	7.93	7.93	7.93	7.93	7.93	2.2895	3.17538		33653	N/A	3.95	4.11	4.33	5.28	5.78	6.67	7.05	7.42	N/A	7.93	1992-02-19	1
1	1	1	1	1	7.91		7.91	7.91	7.91	7.91	7.91	7.91	7.91	7.91	7.91	7.91	7.91	2.2569	3.12828		33654	N/A	3.98	4.14	4.38	5.3	5.78	6.67	7.03	7.41	N/A	7.91	1992-02-20	1
1	1	1	1	1	7.95		7.95	7.95	7.95	7.95	7.95	7.95	7.95	7.95	7.95	7.95	7.95	2.21943	3.08996		33655	N/A	4.03	4.2	4.47	5.46	5.93	6.77	7.1	7.45	N/A	7.95	1992-02-21	1
1	1	1	1	1	7.97		7.97	7.97	7.97	7.97	7.97	7.97	7.97	7.97	7.97	7.97	7.97	2.21639	3.08797		33658	N/A	4.07	4.23	4.48	5.46	5.96	6.81	7.12	7.47	N/A	7.97	1992-02-24	1
1	1	1	1	1	7.94		7.94	7.94	7.94	7.94	7.94	7.94	7.94	7.94	7.94	7.94	7.94	2.20649	3.07104		33659	N/A	4.07	4.22	4.47	5.43	5.92	6.78	7.09	7.44	N/A	7.94	1992-02-25	1
1	1	1	1	1	7.85		7.85	7.85	7.85	7.85	7.85	7.85	7.85	7.85	7.85	7.85	7.85	2.18245	3.03189		33660	N/A	4.05	4.18	4.4	5.37	5.84	6.66	7.01	7.33	N/A	7.85	1992-02-26	1
1	1	1	1	1	7.86		7.86	7.86	7.86	7.86	7.86	7.86	7.86	7.86	7.86	7.86	7.86	2.20523	3.06696		33661	N/A	4.04	4.14	4.36	5.34	5.84	6.67	7.02	7.35	N/A	7.86	1992-02-27	1
1	1	1	1	1	7.8		7.8	7.8	7.8	7.8	7.8	7.8	7.8	7.8	7.8	7.8	7.8	2.18687	3.03024		33662	N/A	4.03	4.14	4.35	5.27	5.75	6.58	6.95	7.27	N/A	7.8	1992-02-28	1
1	1	1	1	1	7.9		7.9	7.9	7.9	7.9	7.9	7.9	7.9	7.9	7.9	7.9	7.9	2.15268	2.99348		33665	N/A	4.14	4.28	4.5	5.45	5.94	6.73	7.07	7.38	N/A	7.9	1992-03-02	1
1	1	1	1	1	7.93		7.93	7.93	7.93	7.93	7.93	7.93	7.93	7.93	7.93	7.93	7.93	2.16662	3.01282		33666	N/A	4.14	4.28	4.51	5.48	5.94	6.76	7.11	7.43	N/A	7.93	1992-03-03	1
1	1	1	1	1	7.9		7.9	7.9	7.9	7.9	7.9	7.9	7.9	7.9	7.9	7.9	7.9	2.14097	2.98577		33667	N/A	4.13	4.27	4.52	5.5	5.98	6.76	7.1	7.43	N/A	7.9	1992-03-04	1
1	1	1	1	1	7.95		7.95	7.95	7.95	7.95	7.95	7.95	7.95	7.95	7.95	7.95	7.95	2.12389	2.97624		33668	N/A	4.14	4.3	4.63	5.62	6.1	6.87	7.21	7.51	N/A	7.95	1992-03-05	1
1	1	1	1	1	7.93		7.93	7.93	7.93	7.93	7.93	7.93	7.93	7.93	7.93	7.93	7.93	2.1234	2.97091		33669	N/A	4.14	4.29	4.6	5.6	6.05	6.85	7.18	7.48	N/A	7.93	1992-03-06	1
1	1	1	1	1	7.88		7.88	7.88	7.88	7.88	7.88	7.88	7.88	7.88	7.88	7.88	7.88	2.11991	2.9626		33672	N/A	4.1	4.27	4.55	5.54	6.01	6.77	7.1	7.42	N/A	7.88	1992-03-09	1
1	1	1	1	1	7.89		7.89	7.89	7.89	7.89	7.89	7.89	7.89	7.89	7.89	7.89	7.89	2.1145	2.9541		33673	N/A	4.11	4.29	4.58	5.56	6.02	6.78	7.11	7.43	N/A	7.89	1992-03-10	1
1	1	1	1	1	7.96		7.96	7.96	7.96	7.96	7.96	7.96	7.96	7.96	7.96	7.96	7.96	2.14574	3.0033		33674	N/A	4.11	4.31	4.6	5.58	6.07	6.86	7.21	7.51	N/A	7.96	1992-03-11	1
1	1	1	1	1	8.04		8.04	8.04	8.04	8.04	8.04	8.04	8.04	8.04	8.04	8.04	8.04	2.14681	3.02136		33675	N/A	4.12	4.33	4.69	5.74	6.22	7.01	7.33	7.62	N/A	8.04	1992-03-12	1
1	1	1	1	1	8.06		8.06	8.06	8.06	8.06	8.06	8.06	8.06	8.06	8.06	8.06	8.06	2.09967	2.97608		33676	N/A	4.16	4.38	4.79	5.86	6.37	7.14	7.44	7.71	N/A	8.06	1992-03-13	1
1	1	1	1	1	8.07		8.07	8.07	8.07	8.07	8.07	8.07	8.07	8.07	8.07	8.07	8.07	2.10061	2.97294		33679	N/A	4.18	4.41	4.78	5.87	6.37	7.12	7.43	7.69	N/A	8.07	1992-03-16	1
1	1	1	1	1	8.02		8.02	8.02	8.02	8.02	8.02	8.02	8.02	8.02	8.02	8.02	8.02	2.09234	2.95847		33680	N/A	4.16	4.39	4.72	5.83	6.32	7.06	7.37	7.62	N/A	8.02	1992-03-17	1
1	1	1	1	1	8.01		8.01	8.01	8.01	8.01	8.01	8.01	8.01	8.01	8.01	8.01	8.01	2.08093	2.94393		33681	N/A	4.15	4.4	4.74	5.84	6.33	7.06	7.36	7.62	N/A	8.01	1992-03-18	1
1	1	1	1	1	7.98		7.98	7.98	7.98	7.98	7.98	7.98	7.98	7.98	7.98	7.98	7.98	2.08075	2.94106		33682	N/A	4.15	4.38	4.69	5.79	6.29	7.03	7.31	7.57	N/A	7.98	1992-03-19	1
1	1	1	1	1	8.05		8.05	8.05	8.05	8.05	8.05	8.05	8.05	8.05	8.05	8.05	8.05	2.10075	2.97344		33683	N/A	4.16	4.4	4.74	5.86	6.36	7.12	7.38	7.64	N/A	8.05	1992-03-20	1
1	1	1	1	1	8.04		8.04	8.04	8.04	8.04	8.04	8.04	8.04	8.04	8.04	8.04	8.04	2.09003	2.95813		33686	N/A	4.17	4.41	4.74	5.87	6.37	7.1	7.37	7.62	N/A	8.04	1992-03-23	1
1	1	1	1	1	7.94		7.94	7.94	7.94	7.94	7.94	7.94	7.94	7.94	7.94	7.94	7.94	2.06862	2.92397		33687	N/A	4.15	4.34	4.66	5.78	6.26	7	7.27	7.53	N/A	7.94	1992-03-24	1
1	1	1	1	1	7.94		7.94	7.94	7.94	7.94	7.94	7.94	7.94	7.94	7.94	7.94	7.94	2.09674	2.95961		33688	N/A	4.11	4.31	4.62	5.72	6.22	6.96	7.25	7.53	N/A	7.94	1992-03-25	1
1	1	1	1	1	7.99		7.99	7.99	7.99	7.99	7.99	7.99	7.99	7.99	7.99	7.99	7.99	2.13705	3.01505		33689	N/A	4.11	4.3	4.6	5.69	6.23	6.98	7.29	7.57	N/A	7.99	1992-03-26	1
1	1	1	1	1	7.94		7.94	7.94	7.94	7.94	7.94	7.94	7.94	7.94	7.94	7.94	7.94	2.10546	2.97505		33690	N/A	4.11	4.29	4.6	5.68	6.22	6.97	7.27	7.54	N/A	7.94	1992-03-27	1
1	1	1	1	1	7.95		7.95	7.95	7.95	7.95	7.95	7.95	7.95	7.95	7.95	7.95	7.95	2.11558	2.98115		33693	N/A	4.16	4.33	4.56	5.61	6.19	6.93	7.25	7.54	N/A	7.95	1992-03-30	1
1	1	1	1	1	7.96		7.96	7.96	7.96	7.96	7.96	7.96	7.96	7.96	7.96	7.96	7.96	2.13108	3.00106		33694	N/A	4.15	4.32	4.54	5.6	6.17	6.94	7.25	7.54	N/A	7.96	1992-03-31	1
1	1	1	1	1	7.9		7.9	7.9	7.9	7.9	7.9	7.9	7.9	7.9	7.9	7.9	7.9	2.1356	2.99757		33695	N/A	4.11	4.26	4.48	5.53	6.07	6.82	7.17	7.46	N/A	7.9	1992-04-01	1
1	1	1	1	1	7.92		7.92	7.92	7.92	7.92	7.92	7.92	7.92	7.92	7.92	7.92	7.92	2.13307	2.99571		33696	N/A	4.12	4.27	4.53	5.55	6.1	6.85	7.2	7.47	N/A	7.92	1992-04-02	1
1	1	1	1	1	7.88		7.88	7.88	7.88	7.88	7.88	7.88	7.88	7.88	7.88	7.88	7.88	2.1867	3.05833		33697	N/A	4.06	4.17	4.4	5.37	5.93	6.76	7.13	7.42	N/A	7.88	1992-04-03	1
1	1	1	1	1	7.88		7.88	7.88	7.88	7.88	7.88	7.88	7.88	7.88	7.88	7.88	7.88	2.19702	3.06976		33700	N/A	4.03	4.17	4.39	5.36	5.91	6.74	7.12	7.41	N/A	7.88	1992-04-06	1
1	1	1	1	1	7.9		7.9	7.9	7.9	7.9	7.9	7.9	7.9	7.9	7.9	7.9	7.9	2.24065	3.12948		33701	N/A	3.96	4.12	4.35	5.34	5.89	6.73	7.12	7.41	N/A	7.9	1992-04-07	1
1	1	1	1	1	7.94		7.94	7.94	7.94	7.94	7.94	7.94	7.94	7.94	7.94	7.94	7.94	2.27775	3.17813		33702	N/A	3.96	4.1	4.32	5.33	5.87	6.76	7.14	7.44	N/A	7.94	1992-04-08	1
1	1	1	1	1	7.85		7.85	7.85	7.85	7.85	7.85	7.85	7.85	7.85	7.85	7.85	7.85	2.37118	3.30094		33703	N/A	3.75	3.87	4.08	5.09	5.65	6.59	7.02	7.35	N/A	7.85	1992-04-09	1
1	1	1	1	1	7.89		7.89	7.89	7.89	7.89	7.89	7.89	7.89	7.89	7.89	7.89	7.89	2.37984	3.31567		33704	N/A	3.74	3.88	4.12	5.16	5.72	6.62	7.03	7.37	N/A	7.89	1992-04-10	1
1	1	1	1	1	7.86		7.86	7.86	7.86	7.86	7.86	7.86	7.86	7.86	7.86	7.86	7.86	2.38631	3.32375		33707	N/A	3.7	3.85	4.08	5.11	5.69	6.58	6.98	7.33	N/A	7.86	1992-04-13	1
1	1	1	1	1	7.88		7.88	7.88	7.88	7.88	7.88	7.88	7.88	7.88	7.88	7.88	7.88	2.39079	3.3303		33708	N/A	3.7	3.85	4.1	5.15	5.71	6.6	6.99	7.35	N/A	7.88	1992-04-14	1
1	1	1	1	1	7.87		7.87	7.87	7.87	7.87	7.87	7.87	7.87	7.87	7.87	7.87	7.87	2.36281	3.30349		33709	N/A	3.7	3.84	4.14	5.22	5.77	6.66	7.02	7.37	N/A	7.87	1992-04-15	1
1	1	1	1	1	7.93		7.93	7.93	7.93	7.93	7.93	7.93	7.93	7.93	7.93	7.93	7.93	2.34853	3.29481		33710	N/A	3.73	3.9	4.23	5.34	5.9	6.76	7.11	7.45	N/A	7.93	1992-04-16	1
1	1	1	1	1	8.02		8.02	8.02	8.02	8.02	8.02	8.02	8.02	8.02	8.02	8.02	8.02	2.33769	3.28999		33714	N/A	3.79	4.01	4.34	5.45	6.03	6.9	7.25	7.59	N/A	8.02	1992-04-20	1
1	1	1	1	1	8.03		8.03	8.03	8.03	8.03	8.03	8.03	8.03	8.03	8.03	8.03	8.03	2.36088	3.31977		33715	N/A	3.77	3.98	4.33	5.41	6.01	6.89	7.24	7.58	N/A	8.03	1992-04-21	1
1	1	1	1	1	8.04		8.04	8.04	8.04	8.04	8.04	8.04	8.04	8.04	8.04	8.04	8.04	2.3687	3.32859		33716	N/A	3.77	3.98	4.33	5.41	6.01	6.89	7.23	7.57	N/A	8.04	1992-04-22	1
1	1	1	1	1	8.06		8.06	8.06	8.06	8.06	8.06	8.06	8.06	8.06	8.06	8.06	8.06	2.37878	3.34678		33717	N/A	3.76	3.97	4.35	5.41	6.05	6.91	7.25	7.59	N/A	8.06	1992-04-23	1
1	1	1	1	1	8.06		8.06	8.06	8.06	8.06	8.06	8.06	8.06	8.06	8.06	8.06	8.06	2.41234	3.38471		33718	N/A	3.76	3.94	4.27	5.33	5.99	6.85	7.21	7.55	N/A	8.06	1992-04-24	1
1	1	1	1	1	8.1		8.1	8.1	8.1	8.1	8.1	8.1	8.1	8.1	8.1	8.1	8.1	2.39231	3.35554		33721	N/A	3.82	4	4.36	5.42	6.04	6.9	7.25	7.6	N/A	8.1	1992-04-27	1
1	1	1	1	1	8.06		8.06	8.06	8.06	8.06	8.06	8.06	8.06	8.06	8.06	8.06	8.06	2.37899	3.34035		33722	N/A	3.8	3.97	4.34	5.4	6.03	6.87	7.23	7.57	N/A	8.06	1992-04-28	1
1	1	1	1	1	8.08		8.08	8.08	8.08	8.08	8.08	8.08	8.08	8.08	8.08	8.08	8.08	2.39591	3.36204		33723	N/A	3.8	3.96	4.34	5.39	6.01	6.88	7.26	7.6	N/A	8.08	1992-04-29	1
1	1	1	1	1	8.06		8.06	8.06	8.06	8.06	8.06	8.06	8.06	8.06	8.06	8.06	8.06	2.36108	3.32014		33724	N/A	3.79	3.97	4.4	5.46	6.05	6.91	7.26	7.61	N/A	8.06	1992-04-30	1
1	1	1	1	1	8.01		8.01	8.01	8.01	8.01	8.01	8.01	8.01	8.01	8.01	8.01	8.01	2.39146	3.36077		33725	N/A	3.72	3.89	4.28	5.33	5.97	6.82	7.2	7.56	N/A	8.01	1992-05-01	1
1	1	1	1	1	8.03		8.03	8.03	8.03	8.03	8.03	8.03	8.03	8.03	8.03	8.03	8.03	2.4066	3.37767		33728	N/A	3.71	3.91	4.28	5.32	5.95	6.82	7.21	7.58	N/A	8.03	1992-05-04	1
1	1	1	1	1	8.01		8.01	8.01	8.01	8.01	8.01	8.01	8.01	8.01	8.01	8.01	8.01	2.39673	3.36047		33729	N/A	3.72	3.92	4.27	5.3	5.92	6.8	7.18	7.56	N/A	8.01	1992-05-05	1
1	1	1	1	1	7.97		7.97	7.97	7.97	7.97	7.97	7.97	7.97	7.97	7.97	7.97	7.97	2.39514	3.35922		33730	N/A	3.7	3.88	4.22	5.25	5.9	6.76	7.15	7.46	N/A	7.97	1992-05-06	1
1	1	1	1	1	8		8	8	8	8	8	8	8	8	8	8	8	2.39022	3.35492		33731	N/A	3.71	3.9	4.26	5.34	5.96	6.8	7.16	7.49	N/A	8	1992-05-07	1
1	1	1	1	1	7.9		7.9	7.9	7.9	7.9	7.9	7.9	7.9	7.9	7.9	7.9	7.9	2.34196	3.28595		33732	N/A	3.72	3.88	4.22	5.29	5.88	6.73	7.09	7.41	N/A	7.9	1992-05-08	1
1	1	1	1	1	7.9		7.9	7.9	7.9	7.9	7.9	7.9	7.9	7.9	7.9	7.9	7.9	2.35762	3.30032		33735	N/A	3.74	3.87	4.18	5.24	5.82	6.71	7.07	7.4	N/A	7.9	1992-05-11	1
1	1	1	1	1	7.86		7.86	7.86	7.86	7.86	7.86	7.86	7.86	7.86	7.86	7.86	7.86	2.35644	3.29724		33736	N/A	3.7	3.84	4.15	5.19	5.78	6.66	7.02	7.36	N/A	7.86	1992-05-12	1
1	1	1	1	1	7.85		7.85	7.85	7.85	7.85	7.85	7.85	7.85	7.85	7.85	7.85	7.85	2.37906	3.32493		33737	N/A	3.67	3.81	4.09	5.14	5.72	6.64	7	7.34	N/A	7.85	1992-05-13	1
1	1	1	1	1	7.87		7.87	7.87	7.87	7.87	7.87	7.87	7.87	7.87	7.87	7.87	7.87	2.39706	3.34685		33738	N/A	3.65	3.82	4.09	5.13	5.72	6.63	7	7.34	N/A	7.87	1992-05-14	1
1	1	1	1	1	7.81		7.81	7.81	7.81	7.81	7.81	7.81	7.81	7.81	7.81	7.81	7.81	2.36307	3.30168		33739	N/A	3.66	3.8	4.08	5.11	5.7	6.6	6.96	7.28	N/A	7.81	1992-05-15	1
1	1	1	1	1	7.82		7.82	7.82	7.82	7.82	7.82	7.82	7.82	7.82	7.82	7.82	7.82	2.36135	3.29407		33742	N/A	3.69	3.83	4.08	5.12	5.69	6.59	6.96	7.28	N/A	7.82	1992-05-18	1
1	1	1	1	1	7.77		7.77	7.77	7.77	7.77	7.77	7.77	7.77	7.77	7.77	7.77	7.77	2.39212	3.32714		33743	N/A	3.62	3.74	4	5	5.59	6.47	6.86	7.2	N/A	7.77	1992-05-19	1
1	1	1	1	1	7.79		7.79	7.79	7.79	7.79	7.79	7.79	7.79	7.79	7.79	7.79	7.79	2.35652	3.28571		33744	N/A	3.65	3.79	4.08	5.13	5.66	6.55	6.93	7.25	N/A	7.79	1992-05-20	1
1	1	1	1	1	7.86		7.86	7.86	7.86	7.86	7.86	7.86	7.86	7.86	7.86	7.86	7.86	2.28642	3.21364		33745	N/A	3.76	3.93	4.25	5.34	5.89	6.77	7.1	7.39	N/A	7.86	1992-05-21	1
1	1	1	1	1	7.83		7.83	7.83	7.83	7.83	7.83	7.83	7.83	7.83	7.83	7.83	7.83	2.29677	3.21893		33746	N/A	3.77	3.91	4.19	5.24	5.81	6.69	7.05	7.35	N/A	7.83	1992-05-22	1
1	1	1	1	1	7.92		7.92	7.92	7.92	7.92	7.92	7.92	7.92	7.92	7.92	7.92	7.92	2.28748	3.20691		33750	N/A	3.84	4.02	4.32	5.35	5.91	6.79	7.14	7.46	N/A	7.92	1992-05-26	1
1	1	1	1	1	7.91		7.91	7.91	7.91	7.91	7.91	7.91	7.91	7.91	7.91	7.91	7.91	2.31631	3.24302		33751	N/A	3.79	3.98	4.27	5.28	5.86	6.74	7.11	7.44	N/A	7.91	1992-05-27	1
1	1	1	1	1	7.87		7.87	7.87	7.87	7.87	7.87	7.87	7.87	7.87	7.87	7.87	7.87	2.31774	3.23654		33752	N/A	3.77	3.95	4.24	5.22	5.79	6.67	7.04	7.36	N/A	7.87	1992-05-28	1
1	1	1	1	1	7.84		7.84	7.84	7.84	7.84	7.84	7.84	7.84	7.84	7.84	7.84	7.84	2.3019	3.20747		33753	N/A	3.79	3.96	4.24	5.19	5.75	6.61	7	7.33	N/A	7.84	1992-05-29	1
1	1	1	1	1	7.9		7.9	7.9	7.9	7.9	7.9	7.9	7.9	7.9	7.9	7.9	7.9	2.29783	3.20646		33756	N/A	3.82	4.01	4.32	5.29	5.84	6.69	7.06	7.39	N/A	7.9	1992-06-01	1
1	1	1	1	1	7.87		7.87	7.87	7.87	7.87	7.87	7.87	7.87	7.87	7.87	7.87	7.87	2.29548	3.19415		33757	N/A	3.83	4	4.3	5.23	5.78	6.61	7.02	7.35	N/A	7.87	1992-06-02	1
1	1	1	1	1	7.88		7.88	7.88	7.88	7.88	7.88	7.88	7.88	7.88	7.88	7.88	7.88	2.31937	3.22469		33758	N/A	3.8	3.99	4.27	5.2	5.76	6.6	7.01	7.34	N/A	7.88	1992-06-03	1
1	1	1	1	1	7.88		7.88	7.88	7.88	7.88	7.88	7.88	7.88	7.88	7.88	7.88	7.88	2.32342	3.2311		33759	N/A	3.78	3.98	4.26	5.22	5.76	6.6	7.01	7.34	N/A	7.88	1992-06-04	1
1	1	1	1	1	7.84		7.84	7.84	7.84	7.84	7.84	7.84	7.84	7.84	7.84	7.84	7.84	2.3276	3.23407		33760	N/A	3.77	3.94	4.21	5.13	5.7	6.55	6.96	7.31	N/A	7.84	1992-06-05	1
1	1	1	1	1	7.84		7.84	7.84	7.84	7.84	7.84	7.84	7.84	7.84	7.84	7.84	7.84	2.32803	3.23476		33763	N/A	3.78	3.95	4.2	5.11	5.69	6.56	6.97	7.31	N/A	7.84	1992-06-08	1
1	1	1	1	1	7.88		7.88	7.88	7.88	7.88	7.88	7.88	7.88	7.88	7.88	7.88	7.88	2.35846	3.27509		33764	N/A	3.77	3.94	4.2	5.11	5.69	6.59	6.99	7.33	N/A	7.88	1992-06-09	1
1	1	1	1	1	7.9		7.9	7.9	7.9	7.9	7.9	7.9	7.9	7.9	7.9	7.9	7.9	2.36868	3.28701		33765	N/A	3.77	3.95	4.2	5.13	5.69	6.59	7.01	7.35	N/A	7.9	1992-06-10	1
1	1	1	1	1	7.88		7.88	7.88	7.88	7.88	7.88	7.88	7.88	7.88	7.88	7.88	7.88	2.37318	3.2928		33766	N/A	3.75	3.92	4.18	5.09	5.67	6.56	6.98	7.33	N/A	7.88	1992-06-11	1
1	1	1	1	1	7.85		7.85	7.85	7.85	7.85	7.85	7.85	7.85	7.85	7.85	7.85	7.85	2.37655	3.28996		33767	N/A	3.75	3.88	4.14	5.06	5.61	6.49	6.94	7.29	N/A	7.85	1992-06-12	1
1	1	1	1	1	7.85		7.85	7.85	7.85	7.85	7.85	7.85	7.85	7.85	7.85	7.85	7.85	2.38046	3.29391		33770	N/A	3.75	3.88	4.13	5.05	5.6	6.49	6.93	7.28	N/A	7.85	1992-06-15	1
1	1	1	1	1	7.84		7.84	7.84	7.84	7.84	7.84	7.84	7.84	7.84	7.84	7.84	7.84	2.39404	3.30471		33771	N/A	3.72	3.86	4.12	5.02	5.56	6.44	6.88	7.24	N/A	7.84	1992-06-16	1
1	1	1	1	1	7.82		7.82	7.82	7.82	7.82	7.82	7.82	7.82	7.82	7.82	7.82	7.82	2.39341	3.30712		33772	N/A	3.7	3.83	4.1	5	5.55	6.44	6.86	7.23	N/A	7.82	1992-06-17	1
1	1	1	1	1	7.8		7.8	7.8	7.8	7.8	7.8	7.8	7.8	7.8	7.8	7.8	7.8	2.40039	3.30909		33773	N/A	3.69	3.82	4.08	4.94	5.5	6.39	6.81	7.19	N/A	7.8	1992-06-18	1
1	1	1	1	1	7.83		7.83	7.83	7.83	7.83	7.83	7.83	7.83	7.83	7.83	7.83	7.83	2.37553	3.27586		33774	N/A	3.74	3.89	4.17	5	5.54	6.45	6.87	7.24	N/A	7.83	1992-06-19	1
1	1	1	1	1	7.84		7.84	7.84	7.84	7.84	7.84	7.84	7.84	7.84	7.84	7.84	7.84	2.38642	3.29084		33777	N/A	3.75	3.88	4.15	4.99	5.55	6.45	6.86	7.24	N/A	7.84	1992-06-22	1
1	1	1	1	1	7.85		7.85	7.85	7.85	7.85	7.85	7.85	7.85	7.85	7.85	7.85	7.85	2.35543	3.24814		33778	N/A	3.77	3.93	4.22	5.1	5.58	6.5	6.88	7.25	N/A	7.85	1992-06-23	1
1	1	1	1	1	7.83		7.83	7.83	7.83	7.83	7.83	7.83	7.83	7.83	7.83	7.83	7.83	2.40922	3.31082		33779	N/A	3.72	3.85	4.11	4.96	5.47	6.39	6.83	7.2	N/A	7.83	1992-06-24	1
1	1	1	1	1	7.78		7.78	7.78	7.78	7.78	7.78	7.78	7.78	7.78	7.78	7.78	7.78	2.4014	3.29286		33780	N/A	3.71	3.82	4.09	4.89	5.41	6.32	6.75	7.14	N/A	7.78	1992-06-25	1
1	1	1	1	1	7.79		7.79	7.79	7.79	7.79	7.79	7.79	7.79	7.79	7.79	7.79	7.79	2.40297	3.29662		33781	N/A	3.71	3.83	4.11	4.88	5.42	6.33	6.78	7.15	N/A	7.79	1992-06-26	1
1	1	1	1	1	7.78		7.78	7.78	7.78	7.78	7.78	7.78	7.78	7.78	7.78	7.78	7.78	2.43538	3.339		33784	N/A	3.66	3.77	4.04	4.83	5.38	6.29	6.74	7.12	N/A	7.78	1992-06-29	1
1	1	1	1	1	7.79		7.79	7.79	7.79	7.79	7.79	7.79	7.79	7.79	7.79	7.79	7.79	2.44099	3.34811		33785	N/A	3.65	3.77	4.05	4.83	5.39	6.29	6.76	7.14	N/A	7.79	1992-06-30	1
1	1	1	1	1	7.76		7.76	7.76	7.76	7.76	7.76	7.76	7.76	7.76	7.76	7.76	7.76	2.43086	3.33524		33786	N/A	3.63	3.75	4.04	4.82	5.38	6.27	6.73	7.1	N/A	7.76	1992-07-01	1
1	1	1	1	1	7.63		7.63	7.63	7.63	7.63	7.63	7.63	7.63	7.63	7.63	7.63	7.63	2.54966	3.49474		33787	N/A	3.31	3.45	3.7	4.55	5.15	6.02	6.53	6.93	N/A	7.63	1992-07-02	1
1	1	1	1	1	7.62		7.62	7.62	7.62	7.62	7.62	7.62	7.62	7.62	7.62	7.62	7.62	2.57845	3.5231		33791	N/A	3.29	3.41	3.67	4.46	5.06	5.97	6.49	6.9	N/A	7.62	1992-07-06	1
1	1	1	1	1	7.61		7.61	7.61	7.61	7.61	7.61	7.61	7.61	7.61	7.61	7.61	7.61	2.60221	3.54362		33792	N/A	3.28	3.38	3.63	4.4	4.98	5.91	6.45	6.87	N/A	7.61	1992-07-07	1
1	1	1	1	1	7.61		7.61	7.61	7.61	7.61	7.61	7.61	7.61	7.61	7.61	7.61	7.61	2.59703	3.53879		33793	N/A	3.29	3.39	3.63	4.4	4.98	5.93	6.45	6.91	N/A	7.61	1992-07-08	1
1	1	1	1	1	7.61		7.61	7.61	7.61	7.61	7.61	7.61	7.61	7.61	7.61	7.61	7.61	2.60242	3.54601		33794	N/A	3.28	3.37	3.63	4.4	4.97	5.93	6.45	6.91	N/A	7.61	1992-07-09	1
1	1	1	1	1	7.64		7.64	7.64	7.64	7.64	7.64	7.64	7.64	7.64	7.64	7.64	7.64	2.63035	3.57613		33795	N/A	3.29	3.37	3.62	4.38	4.95	5.92	6.43	6.93	N/A	7.64	1992-07-10	1
1	1	1	1	1	7.67		7.67	7.67	7.67	7.67	7.67	7.67	7.67	7.67	7.67	7.67	7.67	2.64145	3.59201		33798	N/A	3.29	3.4	3.62	4.4	4.97	5.94	6.46	6.97	N/A	7.67	1992-07-13	1
1	1	1	1	1	7.69		7.69	7.69	7.69	7.69	7.69	7.69	7.69	7.69	7.69	7.69	7.69	2.68572	3.64295		33799	N/A	3.28	3.38	3.57	4.32	4.91	5.9	6.45	6.97	N/A	7.69	1992-07-14	1
1	1	1	1	1	7.64		7.64	7.64	7.64	7.64	7.64	7.64	7.64	7.64	7.64	7.64	7.64	2.69923	3.65091		33800	N/A	3.25	3.33	3.48	4.25	4.82	5.8	6.37	6.9	N/A	7.64	1992-07-15	1
1	1	1	1	1	7.62		7.62	7.62	7.62	7.62	7.62	7.62	7.62	7.62	7.62	7.62	7.62	2.68884	3.63561		33801	N/A	3.24	3.32	3.49	4.25	4.8	5.8	6.35	6.87	N/A	7.62	1992-07-16	1
1	1	1	1	1	7.68		7.68	7.68	7.68	7.68	7.68	7.68	7.68	7.68	7.68	7.68	7.68	2.72685	3.68545		33802	N/A	3.23	3.32	3.5	4.27	4.83	5.82	6.38	6.9	N/A	7.68	1992-07-17	1
1	1	1	1	1	7.66		7.66	7.66	7.66	7.66	7.66	7.66	7.66	7.66	7.66	7.66	7.66	2.69684	3.6455		33805	N/A	3.26	3.35	3.51	4.3	4.84	5.82	6.38	6.9	N/A	7.66	1992-07-20	1
1	1	1	1	1	7.67		7.67	7.67	7.67	7.67	7.67	7.67	7.67	7.67	7.67	7.67	7.67	2.69087	3.63559		33806	N/A	3.26	3.36	3.55	4.34	4.87	5.82	6.37	6.89	N/A	7.67	1992-07-21	1
1	1	1	1	1	7.62		7.62	7.62	7.62	7.62	7.62	7.62	7.62	7.62	7.62	7.62	7.62	2.67856	3.61441		33807	N/A	3.24	3.34	3.53	4.29	4.81	5.77	6.32	6.85	N/A	7.62	1992-07-22	1
1	1	1	1	1	7.54		7.54	7.54	7.54	7.54	7.54	7.54	7.54	7.54	7.54	7.54	7.54	2.66003	3.56697		33808	N/A	3.23	3.33	3.52	4.2	4.71	5.62	6.18	6.72	N/A	7.54	1992-07-23	1
1	1	1	1	1	7.57		7.57	7.57	7.57	7.57	7.57	7.57	7.57	7.57	7.57	7.57	7.57	2.66257	3.57523		33809	N/A	3.23	3.34	3.55	4.25	4.77	5.66	6.2	6.73	N/A	7.57	1992-07-24	1
1	1	1	1	1	7.53		7.53	7.53	7.53	7.53	7.53	7.53	7.53	7.53	7.53	7.53	7.53	2.61686	3.51242		33812	N/A	3.26	3.38	3.58	4.27	4.78	5.66	6.16	6.69	N/A	7.53	1992-07-27	1
1	1	1	1	1	7.44		7.44	7.44	7.44	7.44	7.44	7.44	7.44	7.44	7.44	7.44	7.44	2.56262	3.44383		33813	N/A	3.26	3.36	3.55	4.27	4.75	5.63	6.11	6.63	N/A	7.44	1992-07-28	1
1	1	1	1	1	7.43		7.43	7.43	7.43	7.43	7.43	7.43	7.43	7.43	7.43	7.43	7.43	2.56145	3.44331		33814	N/A	3.25	3.36	3.54	4.25	4.76	5.62	6.09	6.6	N/A	7.43	1992-07-29	1
1	1	1	1	1	7.46		7.46	7.46	7.46	7.46	7.46	7.46	7.46	7.46	7.46	7.46	7.46	2.54081	3.44631		33815	N/A	3.25	3.36	3.58	4.33	4.88	5.76	6.24	6.69	N/A	7.46	1992-07-30	1
1	1	1	1	1	7.46		7.46	7.46	7.46	7.46	7.46	7.46	7.46	7.46	7.46	7.46	7.46	2.50719	3.41636		33816	N/A	3.25	3.38	3.62	4.42	4.97	5.84	6.27	6.72	N/A	7.46	1992-07-31	1
1	1	1	1	1	7.46		7.46	7.46	7.46	7.46	7.46	7.46	7.46	7.46	7.46	7.46	7.46	2.51154	3.42218		33819	N/A	3.25	3.38	3.61	4.4	4.97	5.82	6.28	6.72	N/A	7.46	1992-08-03	1
1	1	1	1	1	7.43		7.43	7.43	7.43	7.43	7.43	7.43	7.43	7.43	7.43	7.43	7.43	2.5278	3.42797		33820	N/A	3.24	3.36	3.57	4.31	4.88	5.72	6.2	6.66	N/A	7.43	1992-08-04	1
1	1	1	1	1	7.43		7.43	7.43	7.43	7.43	7.43	7.43	7.43	7.43	7.43	7.43	7.43	2.54119	3.43613		33821	N/A	3.24	3.36	3.55	4.29	4.83	5.69	6.17	6.64	N/A	7.43	1992-08-05	1
1	1	1	1	1	7.45		7.45	7.45	7.45	7.45	7.45	7.45	7.45	7.45	7.45	7.45	7.45	2.5625	3.46099		33822	N/A	3.23	3.35	3.54	4.29	4.82	5.67	6.18	6.65	N/A	7.45	1992-08-06	1
1	1	1	1	1	7.4		7.4	7.4	7.4	7.4	7.4	7.4	7.4	7.4	7.4	7.4	7.4	2.58582	3.47845		33823	N/A	3.21	3.29	3.44	4.18	4.71	5.56	6.08	6.57	N/A	7.4	1992-08-07	1
1	1	1	1	1	7.37		7.37	7.37	7.37	7.37	7.37	7.37	7.37	7.37	7.37	7.37	7.37	2.58453	3.46753		33826	N/A	3.2	3.3	3.42	4.12	4.67	5.5	6.01	6.52	N/A	7.37	1992-08-10	1
1	1	1	1	1	7.33		7.33	7.33	7.33	7.33	7.33	7.33	7.33	7.33	7.33	7.33	7.33	2.55098	3.42404		33827	N/A	3.2	3.3	3.43	4.15	4.66	5.5	5.99	6.5	N/A	7.33	1992-08-11	1
1	1	1	1	1	7.33		7.33	7.33	7.33	7.33	7.33	7.33	7.33	7.33	7.33	7.33	7.33	2.53703	3.41451		33828	N/A	3.19	3.3	3.45	4.19	4.71	5.54	6.02	6.48	N/A	7.33	1992-08-12	1
1	1	1	1	1	7.36		7.36	7.36	7.36	7.36	7.36	7.36	7.36	7.36	7.36	7.36	7.36	2.56237	3.45775		33829	N/A	3.16	3.28	3.43	4.19	4.72	5.57	6.09	6.55	N/A	7.36	1992-08-13	1
1	1	1	1	1	7.33		7.33	7.33	7.33	7.33	7.33	7.33	7.33	7.33	7.33	7.33	7.33	2.56477	3.45907		33830	N/A	3.13	3.26	3.4	4.14	4.67	5.54	6.06	6.53	N/A	7.33	1992-08-14	1
1	1	1	1	1	7.37		7.37	7.37	7.37	7.37	7.37	7.37	7.37	7.37	7.37	7.37	7.37	2.58781	3.48463		33833	N/A	3.16	3.27	3.41	4.13	4.66	5.55	6.09	6.56	N/A	7.37	1992-08-17	1
1	1	1	1	1	7.33		7.33	7.33	7.33	7.33	7.33	7.33	7.33	7.33	7.33	7.33	7.33	2.60715	3.4938		33834	N/A	3.14	3.22	3.36	4.04	4.56	5.44	6	6.48	N/A	7.33	1992-08-18	1
1	1	1	1	1	7.33		7.33	7.33	7.33	7.33	7.33	7.33	7.33	7.33	7.33	7.33	7.33	2.60017	3.47839		33835	N/A	3.15	3.24	3.38	4.06	4.55	5.43	5.99	6.47	N/A	7.33	1992-08-19	1
1	1	1	1	1	7.32		7.32	7.32	7.32	7.32	7.32	7.32	7.32	7.32	7.32	7.32	7.32	2.59286	3.46637		33836	N/A	3.15	3.25	3.4	4.04	4.54	5.42	5.98	6.46	N/A	7.32	1992-08-20	1
1	1	1	1	1	7.36		7.36	7.36	7.36	7.36	7.36	7.36	7.36	7.36	7.36	7.36	7.36	2.57947	3.46692		33837	N/A	3.14	3.28	3.46	4.13	4.63	5.54	6.08	6.53	N/A	7.36	1992-08-21	1
1	1	1	1	1	7.44		7.44	7.44	7.44	7.44	7.44	7.44	7.44	7.44	7.44	7.44	7.44	2.54626	3.44663		33840	N/A	3.23	3.36	3.57	4.27	4.8	5.72	6.25	6.68	N/A	7.44	1992-08-24	1
1	1	1	1	1	7.47		7.47	7.47	7.47	7.47	7.47	7.47	7.47	7.47	7.47	7.47	7.47	2.55118	3.46172		33841	N/A	3.24	3.36	3.57	4.32	4.86	5.76	6.29	6.73	N/A	7.47	1992-08-25	1
1	1	1	1	1	7.43		7.43	7.43	7.43	7.43	7.43	7.43	7.43	7.43	7.43	7.43	7.43	2.55261	3.46011		33842	N/A	3.23	3.34	3.5	4.26	4.81	5.7	6.25	6.68	N/A	7.43	1992-08-26	1
1	1	1	1	1	7.42		7.42	7.42	7.42	7.42	7.42	7.42	7.42	7.42	7.42	7.42	7.42	2.56209	3.46128		33843	N/A	3.23	3.34	3.48	4.23	4.76	5.65	6.2	6.64	N/A	7.42	1992-08-27	1
1	1	1	1	1	7.42		7.42	7.42	7.42	7.42	7.42	7.42	7.42	7.42	7.42	7.42	7.42	2.57958	3.47657		33844	N/A	3.23	3.34	3.47	4.16	4.72	5.6	6.18	6.63	N/A	7.42	1992-08-28	1
1	1	1	1	1	7.42		7.42	7.42	7.42	7.42	7.42	7.42	7.42	7.42	7.42	7.42	7.42	2.58288	3.4761		33847	N/A	3.23	3.35	3.47	4.15	4.69	5.6	6.17	6.62	N/A	7.42	1992-08-31	1
1	1	1	1	1	7.38		7.38	7.38	7.38	7.38	7.38	7.38	7.38	7.38	7.38	7.38	7.38	2.57813	3.46011		33848	N/A	3.22	3.32	3.45	4.12	4.64	5.52	6.11	6.56	N/A	7.38	1992-09-01	1
1	1	1	1	1	7.37		7.37	7.37	7.37	7.37	7.37	7.37	7.37	7.37	7.37	7.37	7.37	2.58685	3.46427		33849	N/A	3.21	3.31	3.43	4.1	4.59	5.5	6.07	6.54	N/A	7.37	1992-09-02	1
1	1	1	1	1	7.37		7.37	7.37	7.37	7.37	7.37	7.37	7.37	7.37	7.37	7.37	7.37	2.59086	3.47085		33850	N/A	3.21	3.29	3.43	4.09	4.59	5.5	6.07	6.54	N/A	7.37	1992-09-03	1
1	1	1	1	1	7.29		7.29	7.29	7.29	7.29	7.29	7.29	7.29	7.29	7.29	7.29	7.29	2.69946	3.60571		33851	N/A	2.98	3.05	3.18	3.89	4.38	5.3	5.9	6.4	N/A	7.29	1992-09-04	1
1	1	1	1	1	7.23		7.23	7.23	7.23	7.23	7.23	7.23	7.23	7.23	7.23	7.23	7.23	2.69452	3.5869		33855	N/A	2.96	3.01	3.14	3.83	4.31	5.21	5.8	6.29	N/A	7.23	1992-09-08	1
1	1	1	1	1	7.25		7.25	7.25	7.25	7.25	7.25	7.25	7.25	7.25	7.25	7.25	7.25	2.69319	3.58936		33856	N/A	2.97	3.02	3.17	3.85	4.34	5.25	5.83	6.31	N/A	7.25	1992-09-09	1
1	1	1	1	1	7.24		7.24	7.24	7.24	7.24	7.24	7.24	7.24	7.24	7.24	7.24	7.24	2.68649	3.58425		33857	N/A	2.97	3.02	3.17	3.83	4.34	5.26	5.84	6.31	N/A	7.24	1992-09-10	1
1	1	1	1	1	7.3		7.3	7.3	7.3	7.3	7.3	7.3	7.3	7.3	7.3	7.3	7.3	2.70711	3.61848		33858	N/A	2.98	3.04	3.19	3.87	4.39	5.33	5.91	6.37	N/A	7.3	1992-09-11	1
1	1	1	1	1	7.26		7.26	7.26	7.26	7.26	7.26	7.26	7.26	7.26	7.26	7.26	7.26	2.71672	3.62871		33861	N/A	2.95	2.99	3.13	3.8	4.33	5.28	5.86	6.32	N/A	7.26	1992-09-14	1
1	1	1	1	1	7.33		7.33	7.33	7.33	7.33	7.33	7.33	7.33	7.33	7.33	7.33	7.33	2.72092	3.64387		33862	N/A	2.98	3.02	3.2	3.89	4.43	5.37	5.94	6.4	N/A	7.33	1992-09-15	1
1	1	1	1	1	7.35		7.35	7.35	7.35	7.35	7.35	7.35	7.35	7.35	7.35	7.35	7.35	2.7456	3.67942		33863	N/A	2.96	3.01	3.17	3.87	4.42	5.4	5.95	6.41	N/A	7.35	1992-09-16	1
1	1	1	1	1	7.34		7.34	7.34	7.34	7.34	7.34	7.34	7.34	7.34	7.34	7.34	7.34	2.74905	3.68635		33864	N/A	2.94	3	3.14	3.86	4.4	5.41	5.95	6.4	N/A	7.34	1992-09-17	1
1	1	1	1	1	7.32		7.32	7.32	7.32	7.32	7.32	7.32	7.32	7.32	7.32	7.32	7.32	2.73506	3.67317		33865	N/A	2.94	2.99	3.13	3.86	4.4	5.41	5.97	6.41	N/A	7.32	1992-09-18	1
1	1	1	1	1	7.35		7.35	7.35	7.35	7.35	7.35	7.35	7.35	7.35	7.35	7.35	7.35	2.73352	3.67414		33868	N/A	2.97	3	3.16	3.91	4.45	5.46	5.99	6.42	N/A	7.35	1992-09-21	1
1	1	1	1	1	7.45		7.45	7.45	7.45	7.45	7.45	7.45	7.45	7.45	7.45	7.45	7.45	2.77695	3.72914		33869	N/A	2.98	3.04	3.2	3.98	4.49	5.52	6.07	6.5	N/A	7.45	1992-09-22	1
1	1	1	1	1	7.48		7.48	7.48	7.48	7.48	7.48	7.48	7.48	7.48	7.48	7.48	7.48	2.78911	3.75072		33870	N/A	2.98	3.06	3.21	3.97	4.52	5.54	6.13	6.54	N/A	7.48	1992-09-23	1
1	1	1	1	1	7.42		7.42	7.42	7.42	7.42	7.42	7.42	7.42	7.42	7.42	7.42	7.42	2.78255	3.73662		33871	N/A	2.95	3.01	3.17	3.91	4.45	5.47	6.06	6.48	N/A	7.42	1992-09-24	1
1	1	1	1	1	7.35		7.35	7.35	7.35	7.35	7.35	7.35	7.35	7.35	7.35	7.35	7.35	2.81625	3.7711		33872	N/A	2.86	2.92	3.04	3.78	4.31	5.33	5.96	6.41	N/A	7.35	1992-09-25	1
1	1	1	1	1	7.34		7.34	7.34	7.34	7.34	7.34	7.34	7.34	7.34	7.34	7.34	7.34	2.8271	3.7785		33875	N/A	2.79	2.93	3.04	3.77	4.29	5.28	5.91	6.37	N/A	7.34	1992-09-28	1
1	1	1	1	1	7.36		7.36	7.36	7.36	7.36	7.36	7.36	7.36	7.36	7.36	7.36	7.36	2.83215	3.78612		33876	N/A	2.79	2.93	3.06	3.8	4.31	5.31	5.92	6.37	N/A	7.36	1992-09-29	1
1	1	1	1	1	7.38		7.38	7.38	7.38	7.38	7.38	7.38	7.38	7.38	7.38	7.38	7.38	2.84996	3.81595		33877	N/A	2.75	2.92	3.06	3.8	4.34	5.33	5.94	6.37	N/A	7.38	1992-09-30	1
1	1	1	1	1	7.3		7.3	7.3	7.3	7.3	7.3	7.3	7.3	7.3	7.3	7.3	7.3	2.87709	3.83224		33878	N/A	2.67	2.83	2.96	3.67	4.18	5.18	5.8	6.23	N/A	7.3	1992-10-01	1
1	1	1	1	1	7.33		7.33	7.33	7.33	7.33	7.33	7.33	7.33	7.33	7.33	7.33	7.33	2.87722	3.8327		33879	N/A	2.69	2.87	2.98	3.71	4.2	5.22	5.84	6.26	N/A	7.33	1992-10-02	1
1	1	1	1	1	7.34		7.34	7.34	7.34	7.34	7.34	7.34	7.34	7.34	7.34	7.34	7.34	2.88659	3.83286		33882	N/A	2.75	2.87	2.98	3.68	4.18	5.18	5.81	6.24	N/A	7.34	1992-10-05	1
1	1	1	1	1	7.41		7.41	7.41	7.41	7.41	7.41	7.41	7.41	7.41	7.41	7.41	7.41	2.89576	3.84663		33883	N/A	2.79	2.92	3.05	3.74	4.24	5.25	5.89	6.3	N/A	7.41	1992-10-06	1
1	1	1	1	1	7.48		7.48	7.48	7.48	7.48	7.48	7.48	7.48	7.48	7.48	7.48	7.48	2.85333	3.817		33884	N/A	2.89	3	3.15	3.88	4.42	5.43	6.03	6.46	N/A	7.48	1992-10-07	1
1	1	1	1	1	7.45		7.45	7.45	7.45	7.45	7.45	7.45	7.45	7.45	7.45	7.45	7.45	2.86863	3.83228		33885	N/A	2.85	2.97	3.08	3.83	4.36	5.37	5.99	6.41	N/A	7.45	1992-10-08	1
1	1	1	1	1	7.52		7.52	7.52	7.52	7.52	7.52	7.52	7.52	7.52	7.52	7.52	7.52	2.84462	3.81409		33886	N/A	2.89	3.03	3.19	4	4.5	5.5	6.08	6.52	N/A	7.52	1992-10-09	1
1	1	1	1	1	7.53		7.53	7.53	7.53	7.53	7.53	7.53	7.53	7.53	7.53	7.53	7.53	2.83579	3.79645		33890	N/A	2.95	3.06	3.22	3.99	4.52	5.49	6.07	6.51	N/A	7.53	1992-10-13	1
1	1	1	1	1	7.5		7.5	7.5	7.5	7.5	7.5	7.5	7.5	7.5	7.5	7.5	7.5	2.78853	3.73599		33891	N/A	2.99	3.1	3.26	4.02	4.54	5.51	6.07	6.51	N/A	7.5	1992-10-14	1
1	1	1	1	1	7.51		7.51	7.51	7.51	7.51	7.51	7.51	7.51	7.51	7.51	7.51	7.51	2.79133	3.74269		33892	N/A	2.98	3.11	3.27	4.02	4.56	5.52	6.08	6.53	N/A	7.51	1992-10-15	1
1	1	1	1	1	7.54		7.54	7.54	7.54	7.54	7.54	7.54	7.54	7.54	7.54	7.54	7.54	2.79586	3.75661		33893	N/A	2.97	3.13	3.3	4.04	4.6	5.57	6.12	6.6	N/A	7.54	1992-10-16	1
1	1	1	1	1	7.57		7.57	7.57	7.57	7.57	7.57	7.57	7.57	7.57	7.57	7.57	7.57	2.7369	3.69753		33896	N/A	3.04	3.23	3.41	4.15	4.74	5.71	6.23	6.69	N/A	7.57	1992-10-19	1
1	1	1	1	1	7.65		7.65	7.65	7.65	7.65	7.65	7.65	7.65	7.65	7.65	7.65	7.65	2.68645	3.66207		33897	N/A	3.09	3.34	3.56	4.34	4.97	5.9	6.44	6.86	N/A	7.65	1992-10-20	1
1	1	1	1	1	7.63		7.63	7.63	7.63	7.63	7.63	7.63	7.63	7.63	7.63	7.63	7.63	2.73325	3.71955		33898	N/A	2.99	3.25	3.47	4.29	4.91	5.82	6.35	6.8	N/A	7.63	1992-10-21	1
1	1	1	1	1	7.61		7.61	7.61	7.61	7.61	7.61	7.61	7.61	7.61	7.61	7.61	7.61	2.73703	3.71777		33899	N/A	2.98	3.25	3.45	4.24	4.86	5.79	6.32	6.74	N/A	7.61	1992-10-22	1
1	1	1	1	1	7.65		7.65	7.65	7.65	7.65	7.65	7.65	7.65	7.65	7.65	7.65	7.65	2.70902	3.69757		33900	N/A	3	3.3	3.52	4.37	4.98	5.91	6.41	6.83	N/A	7.65	1992-10-23	1
1	1	1	1	1	7.66		7.66	7.66	7.66	7.66	7.66	7.66	7.66	7.66	7.66	7.66	7.66	2.70444	3.69118		33903	N/A	3.02	3.3	3.55	4.39	5	5.92	6.42	6.83	N/A	7.66	1992-10-26	1
1	1	1	1	1	7.62		7.62	7.62	7.62	7.62	7.62	7.62	7.62	7.62	7.62	7.62	7.62	2.71537	3.69115		33904	N/A	3	3.29	3.48	4.32	4.9	5.82	6.34	6.78	N/A	7.62	1992-10-27	1
1	1	1	1	1	7.64		7.64	7.64	7.64	7.64	7.64	7.64	7.64	7.64	7.64	7.64	7.64	2.73808	3.71857		33905	N/A	3	3.27	3.45	4.33	4.89	5.83	6.33	6.76	N/A	7.64	1992-10-28	1
1	1	1	1	1	7.6		7.6	7.6	7.6	7.6	7.6	7.6	7.6	7.6	7.6	7.6	7.6	2.70828	3.67131		33906	N/A	3.02	3.27	3.48	4.33	4.87	5.79	6.27	6.71	N/A	7.6	1992-10-29	1
1	1	1	1	1	7.63		7.63	7.63	7.63	7.63	7.63	7.63	7.63	7.63	7.63	7.63	7.63	2.68792	3.66488		33907	N/A	3.03	3.29	3.54	4.4	4.98	5.9	6.36	6.8	N/A	7.63	1992-10-30	1
1	1	1	1	1	7.66		7.66	7.66	7.66	7.66	7.66	7.66	7.66	7.66	7.66	7.66	7.66	2.65769	3.63456		33910	N/A	3.08	3.35	3.62	4.47	5.07	5.96	6.46	6.88	N/A	7.66	1992-11-02	1
1	1	1	1	1	7.65		7.65	7.65	7.65	7.65	7.65	7.65	7.65	7.65	7.65	7.65	7.65	2.66695	3.64423		33911	N/A	3.1	3.32	3.57	4.44	5.03	5.94	6.45	6.87	N/A	7.65	1992-11-03	1
1	1	1	1	1	7.69		7.69	7.69	7.69	7.69	7.69	7.69	7.69	7.69	7.69	7.69	7.69	2.70142	3.68446		33912	N/A	3.09	3.32	3.56	4.44	5.01	5.94	6.46	6.89	N/A	7.69	1992-11-04	1
1	1	1	1	1	7.69		7.69	7.69	7.69	7.69	7.69	7.69	7.69	7.69	7.69	7.69	7.69	2.72066	3.70504		33913	N/A	3.08	3.3	3.54	4.39	4.96	5.93	6.44	6.87	N/A	7.69	1992-11-05	1
1	1	1	1	1	7.76		7.76	7.76	7.76	7.76	7.76	7.76	7.76	7.76	7.76	7.76	7.76	2.7161	3.70872		33914	N/A	3.13	3.37	3.6	4.48	5.07	6.02	6.54	6.97	N/A	7.76	1992-11-06	1
1	1	1	1	1	7.75		7.75	7.75	7.75	7.75	7.75	7.75	7.75	7.75	7.75	7.75	7.75	2.66477	3.65348		33917	N/A	3.17	3.4	3.66	4.57	5.16	6.09	6.59	7	N/A	7.75	1992-11-09	1
1	1	1	1	1	7.68		7.68	7.68	7.68	7.68	7.68	7.68	7.68	7.68	7.68	7.68	7.68	2.6464	3.62234		33918	N/A	3.15	3.38	3.62	4.5	5.1	6.01	6.5	6.91	N/A	7.68	1992-11-10	1
1	1	1	1	1	7.57		7.57	7.57	7.57	7.57	7.57	7.57	7.57	7.57	7.57	7.57	7.57	2.59998	3.54703		33920	N/A	3.13	3.38	3.59	4.44	5	5.89	6.38	6.79	N/A	7.57	1992-11-12	1
1	1	1	1	1	7.57		7.57	7.57	7.57	7.57	7.57	7.57	7.57	7.57	7.57	7.57	7.57	2.55055	3.49491		33921	N/A	3.15	3.42	3.68	4.54	5.09	5.99	6.44	6.82	N/A	7.57	1992-11-13	1
1	1	1	1	1	7.56		7.56	7.56	7.56	7.56	7.56	7.56	7.56	7.56	7.56	7.56	7.56	2.47392	3.4124		33924	N/A	3.22	3.47	3.77	4.68	5.21	6.11	6.54	6.9	N/A	7.56	1992-11-16	1
1	1	1	1	1	7.55		7.55	7.55	7.55	7.55	7.55	7.55	7.55	7.55	7.55	7.55	7.55	2.47206	3.40669		33925	N/A	3.24	3.48	3.73	4.67	5.21	6.08	6.51	6.86	N/A	7.55	1992-11-17	1
1	1	1	1	1	7.51		7.51	7.51	7.51	7.51	7.51	7.51	7.51	7.51	7.51	7.51	7.51	2.48662	3.41003		33926	N/A	3.22	3.45	3.68	4.58	5.11	5.97	6.41	6.78	N/A	7.51	1992-11-18	1
1	1	1	1	1	7.54		7.54	7.54	7.54	7.54	7.54	7.54	7.54	7.54	7.54	7.54	7.54	2.49681	3.42356		33927	N/A	3.22	3.46	3.72	4.59	5.12	6	6.44	6.81	N/A	7.54	1992-11-19	1
1	1	1	1	1	7.54		7.54	7.54	7.54	7.54	7.54	7.54	7.54	7.54	7.54	7.54	7.54	2.45165	3.3733		33928	N/A	3.28	3.51	3.77	4.66	5.2	6.08	6.48	6.84	N/A	7.54	1992-11-20	1
1	1	1	1	1	7.56		7.56	7.56	7.56	7.56	7.56	7.56	7.56	7.56	7.56	7.56	7.56	2.44372	3.36123		33931	N/A	3.34	3.55	3.77	4.69	5.22	6.1	6.51	6.86	N/A	7.56	1992-11-23	1
1	1	1	1	1	7.53		7.53	7.53	7.53	7.53	7.53	7.53	7.53	7.53	7.53	7.53	7.53	2.46646	3.38851		33932	N/A	3.29	3.51	3.69	4.61	5.16	6.04	6.45	6.82	N/A	7.53	1992-11-24	1
1	1	1	1	1	7.54		7.54	7.54	7.54	7.54	7.54	7.54	7.54	7.54	7.54	7.54	7.54	2.43547	3.35627		33933	N/A	3.31	3.54	3.75	4.7	5.23	6.12	6.5	6.84	N/A	7.54	1992-11-25	1
1	1	1	1	1	7.59		7.59	7.59	7.59	7.59	7.59	7.59	7.59	7.59	7.59	7.59	7.59	2.42889	3.36539		33935	N/A	3.33	3.56	3.81	4.77	5.36	6.22	6.6	6.93	N/A	7.59	1992-11-27	1
1	1	1	1	1	7.59		7.59	7.59	7.59	7.59	7.59	7.59	7.59	7.59	7.59	7.59	7.59	2.41161	3.34011		33938	N/A	3.38	3.58	3.83	4.79	5.36	6.23	6.61	6.95	N/A	7.59	1992-11-30	1
1	1	1	1	1	7.57		7.57	7.57	7.57	7.57	7.57	7.57	7.57	7.57	7.57	7.57	7.57	2.38272	3.30488		33939	N/A	3.4	3.59	3.86	4.81	5.39	6.24	6.61	6.94	N/A	7.57	1992-12-01	1
1	1	1	1	1	7.57		7.57	7.57	7.57	7.57	7.57	7.57	7.57	7.57	7.57	7.57	7.57	2.38465	3.30675		33940	N/A	3.42	3.58	3.84	4.81	5.39	6.23	6.61	6.93	N/A	7.57	1992-12-02	1
1	1	1	1	1	7.57		7.57	7.57	7.57	7.57	7.57	7.57	7.57	7.57	7.57	7.57	7.57	2.40546	3.33142		33941	N/A	3.37	3.56	3.83	4.78	5.36	6.2	6.59	6.91	N/A	7.57	1992-12-03	1
1	1	1	1	1	7.5		7.5	7.5	7.5	7.5	7.5	7.5	7.5	7.5	7.5	7.5	7.5	2.41221	3.33724		33942	N/A	3.32	3.48	3.73	4.7	5.27	6.11	6.51	6.84	N/A	7.5	1992-12-04	1
1	1	1	1	1	7.45		7.45	7.45	7.45	7.45	7.45	7.45	7.45	7.45	7.45	7.45	7.45	2.39912	3.3105		33945	N/A	3.35	3.47	3.69	4.62	5.19	6.05	6.45	6.78	N/A	7.45	1992-12-07	1
1	1	1	1	1	7.44		7.44	7.44	7.44	7.44	7.44	7.44	7.44	7.44	7.44	7.44	7.44	2.41864	3.32575		33946	N/A	3.33	3.44	3.66	4.59	5.13	5.99	6.39	6.73	N/A	7.44	1992-12-08	1
1	1	1	1	1	7.44		7.44	7.44	7.44	7.44	7.44	7.44	7.44	7.44	7.44	7.44	7.44	2.41167	3.32298		33947	N/A	3.3	3.44	3.69	4.61	5.16	6.01	6.41	6.76	N/A	7.44	1992-12-09	1
1	1	1	1	1	7.42		7.42	7.42	7.42	7.42	7.42	7.42	7.42	7.42	7.42	7.42	7.42	2.37815	3.28365		33948	N/A	3.29	3.47	3.72	4.67	5.19	6.04	6.42	6.77	N/A	7.42	1992-12-10	1
1	1	1	1	1	7.44		7.44	7.44	7.44	7.44	7.44	7.44	7.44	7.44	7.44	7.44	7.44	2.34227	3.24343		33949	N/A	3.32	3.51	3.82	4.78	5.29	6.1	6.48	6.8	N/A	7.44	1992-12-11	1
1	1	1	1	1	7.45		7.45	7.45	7.45	7.45	7.45	7.45	7.45	7.45	7.45	7.45	7.45	2.32841	3.23249		33952	N/A	3.33	3.54	3.85	4.8	5.34	6.15	6.52	6.83	N/A	7.45	1992-12-14	1
1	1	1	1	1	7.45		7.45	7.45	7.45	7.45	7.45	7.45	7.45	7.45	7.45	7.45	7.45	2.36029	3.2729		33953	N/A	3.29	3.5	3.78	4.77	5.29	6.12	6.5	6.83	N/A	7.45	1992-12-15	1
1	1	1	1	1	7.44		7.44	7.44	7.44	7.44	7.44	7.44	7.44	7.44	7.44	7.44	7.44	2.39145	3.30403		33954	N/A	3.28	3.46	3.73	4.67	5.21	6.06	6.44	6.77	N/A	7.44	1992-12-16	1
1	1	1	1	1	7.43		7.43	7.43	7.43	7.43	7.43	7.43	7.43	7.43	7.43	7.43	7.43	2.37893	3.28955		33955	N/A	3.27	3.48	3.73	4.69	5.21	6.08	6.45	6.77	N/A	7.43	1992-12-17	1
1	1	1	1	1	7.43		7.43	7.43	7.43	7.43	7.43	7.43	7.43	7.43	7.43	7.43	7.43	2.40363	3.32567		33956	N/A	3.23	3.43	3.69	4.66	5.2	6.07	6.44	6.76	N/A	7.43	1992-12-18	1
1	1	1	1	1	7.38		7.38	7.38	7.38	7.38	7.38	7.38	7.38	7.38	7.38	7.38	7.38	2.37134	3.28198		33959	N/A	3.25	3.43	3.68	4.64	5.18	6.05	6.41	6.71	N/A	7.38	1992-12-21	1
1	1	1	1	1	7.34		7.34	7.34	7.34	7.34	7.34	7.34	7.34	7.34	7.34	7.34	7.34	2.35818	3.25773		33960	N/A	3.27	3.41	3.63	4.64	5.12	6.02	6.36	6.65	N/A	7.34	1992-12-22	1
1	1	1	1	1	7.36		7.36	7.36	7.36	7.36	7.36	7.36	7.36	7.36	7.36	7.36	7.36	2.37438	3.28208		33961	N/A	3.25	3.41	3.63	4.63	5.14	6.01	6.39	6.68	N/A	7.36	1992-12-23	1
1	1	1	1	1	7.36		7.36	7.36	7.36	7.36	7.36	7.36	7.36	7.36	7.36	7.36	7.36	2.38039	3.29211		33962	N/A	3.23	3.41	3.63	4.6	5.13	6.02	6.4	6.69	N/A	7.36	1992-12-24	1
1	1	1	1	1	7.4		7.4	7.4	7.4	7.4	7.4	7.4	7.4	7.4	7.4	7.4	7.4	2.37608	3.28425		33966	N/A	3.3	3.48	3.64	4.64	5.17	6.06	6.43	6.72	N/A	7.4	1992-12-28	1
1	1	1	1	1	7.37		7.37	7.37	7.37	7.37	7.37	7.37	7.37	7.37	7.37	7.37	7.37	2.36968	3.2774		33967	N/A	3.27	3.45	3.64	4.61	5.15	6.04	6.42	6.69	N/A	7.37	1992-12-29	1
1	1	1	1	1	7.39		7.39	7.39	7.39	7.39	7.39	7.39	7.39	7.39	7.39	7.39	7.39	2.43515	3.35723		33968	N/A	3.19	3.39	3.57	4.54	5.07	5.98	6.39	6.68	N/A	7.39	1992-12-30	1
1	1	1	1	1	7.4		7.4	7.4	7.4	7.4	7.4	7.4	7.4	7.4	7.4	7.4	7.4	2.43332	3.36608		33969	N/A	3.15	3.38	3.61	4.56	5.12	6.04	6.43	6.7	N/A	7.4	1992-12-31	1
1	1	1	1	1	7.33		7.33	7.33	7.33	7.33	7.33	7.33	7.33	7.33	7.33	7.33	7.33	2.41255	3.32134		33973	N/A	3.19	3.37	3.56	4.48	5.03	5.9	6.33	6.6	N/A	7.33	1993-01-04	1
1	1	1	1	1	7.33		7.33	7.33	7.33	7.33	7.33	7.33	7.33	7.33	7.33	7.33	7.33	2.41549	3.3217		33974	N/A	3.18	3.36	3.58	4.48	5	5.9	6.32	6.61	N/A	7.33	1993-01-05	1
1	1	1	1	1	7.34		7.34	7.34	7.34	7.34	7.34	7.34	7.34	7.34	7.34	7.34	7.34	2.40686	3.31963		33975	N/A	3.17	3.35	3.62	4.52	5.06	5.94	6.36	6.63	N/A	7.34	1993-01-06	1
1	1	1	1	1	7.45		7.45	7.45	7.45	7.45	7.45	7.45	7.45	7.45	7.45	7.45	7.45	2.43511	3.36663		33976	N/A	3.19	3.38	3.7	4.64	5.17	6.05	6.49	6.76	N/A	7.45	1993-01-07	1
1	1	1	1	1	7.47		7.47	7.47	7.47	7.47	7.47	7.47	7.47	7.47	7.47	7.47	7.47	2.5221	3.47372		33977	N/A	3.13	3.3	3.56	4.5	5.06	5.97	6.44	6.75	N/A	7.47	1993-01-08	1
1	1	1	1	1	7.47		7.47	7.47	7.47	7.47	7.47	7.47	7.47	7.47	7.47	7.47	7.47	2.54075	3.48894		33980	N/A	3.12	3.28	3.54	4.48	5.01	5.93	6.4	6.71	N/A	7.47	1993-01-11	1
1	1	1	1	1	7.48		7.48	7.48	7.48	7.48	7.48	7.48	7.48	7.48	7.48	7.48	7.48	2.55555	3.51492		33981	N/A	3.09	3.24	3.54	4.48	5.03	5.95	6.41	6.72	N/A	7.48	1993-01-12	1
1	1	1	1	1	7.45		7.45	7.45	7.45	7.45	7.45	7.45	7.45	7.45	7.45	7.45	7.45	2.54792	3.50599		33982	N/A	3.06	3.24	3.51	4.46	5.02	5.93	6.36	6.71	N/A	7.45	1993-01-13	1
1	1	1	1	1	7.41		7.41	7.41	7.41	7.41	7.41	7.41	7.41	7.41	7.41	7.41	7.41	2.54465	3.49498		33983	N/A	3.04	3.23	3.48	4.4	4.96	5.88	6.3	6.65	N/A	7.41	1993-01-14	1
1	1	1	1	1	7.35		7.35	7.35	7.35	7.35	7.35	7.35	7.35	7.35	7.35	7.35	7.35	2.54736	3.49518		33984	N/A	3	3.17	3.42	4.31	4.88	5.8	6.24	6.6	N/A	7.35	1993-01-15	1
1	1	1	1	1	7.31		7.31	7.31	7.31	7.31	7.31	7.31	7.31	7.31	7.31	7.31	7.31	2.47222	3.3931		33988	N/A	3.1	3.23	3.48	4.39	4.91	5.82	6.23	6.59	N/A	7.31	1993-01-19	1
1	1	1	1	1	7.32		7.32	7.32	7.32	7.32	7.32	7.32	7.32	7.32	7.32	7.32	7.32	2.47124	3.39917		33989	N/A	3.08	3.22	3.51	4.41	4.95	5.85	6.26	6.61	N/A	7.32	1993-01-20	1
1	1	1	1	1	7.31		7.31	7.31	7.31	7.31	7.31	7.31	7.31	7.31	7.31	7.31	7.31	2.48691	3.41793		33990	N/A	3.05	3.2	3.48	4.36	4.91	5.83	6.23	6.6	N/A	7.31	1993-01-21	1
1	1	1	1	1	7.3		7.3	7.3	7.3	7.3	7.3	7.3	7.3	7.3	7.3	7.3	7.3	2.51754	3.45217		33991	N/A	3.03	3.15	3.41	4.3	4.85	5.77	6.18	6.57	N/A	7.3	1993-01-22	1
1	1	1	1	1	7.22		7.22	7.22	7.22	7.22	7.22	7.22	7.22	7.22	7.22	7.22	7.22	2.47233	3.38586		33994	N/A	3.02	3.17	3.41	4.26	4.8	5.71	6.11	6.48	N/A	7.22	1993-01-25	1
1	1	1	1	1	7.26		7.26	7.26	7.26	7.26	7.26	7.26	7.26	7.26	7.26	7.26	7.26	2.4868	3.40548		33995	N/A	3.01	3.18	3.45	4.3	4.83	5.75	6.13	6.5	N/A	7.26	1993-01-26	1
1	1	1	1	1	7.25		7.25	7.25	7.25	7.25	7.25	7.25	7.25	7.25	7.25	7.25	7.25	2.51029	3.43319		33996	N/A	2.97	3.15	3.41	4.24	4.8	5.68	6.1	6.48	N/A	7.25	1993-01-27	1
1	1	1	1	1	7.23		7.23	7.23	7.23	7.23	7.23	7.23	7.23	7.23	7.23	7.23	7.23	2.52002	3.43408		33997	N/A	2.96	3.14	3.38	4.2	4.73	5.61	6.05	6.44	N/A	7.23	1993-01-28	1
1	1	1	1	1	7.21		7.21	7.21	7.21	7.21	7.21	7.21	7.21	7.21	7.21	7.21	7.21	2.50715	3.40933		33998	N/A	2.96	3.16	3.39	4.2	4.72	5.57	6	6.39	N/A	7.21	1993-01-29	1
1	1	1	1	1	7.21		7.21	7.21	7.21	7.21	7.21	7.21	7.21	7.21	7.21	7.21	7.21	2.50328	3.39406		34001	N/A	3.01	3.17	3.4	4.19	4.69	5.55	5.97	6.38	N/A	7.21	1993-02-01	1
1	1	1	1	1	7.25		7.25	7.25	7.25	7.25	7.25	7.25	7.25	7.25	7.25	7.25	7.25	2.49945	3.4002		34002	N/A	3.02	3.21	3.43	4.25	4.76	5.63	6.04	6.46	N/A	7.25	1993-02-02	1
1	1	1	1	1	7.23		7.23	7.23	7.23	7.23	7.23	7.23	7.23	7.23	7.23	7.23	7.23	2.48508	3.38419		34003	N/A	2.99	3.21	3.44	4.27	4.77	5.62	6.04	6.45	N/A	7.23	1993-02-03	1
1	1	1	1	1	7.19		7.19	7.19	7.19	7.19	7.19	7.19	7.19	7.19	7.19	7.19	7.19	2.48989	3.37744		34004	N/A	2.96	3.18	3.44	4.19	4.68	5.53	5.98	6.39	N/A	7.19	1993-02-04	1
1	1	1	1	1	7.17		7.17	7.17	7.17	7.17	7.17	7.17	7.17	7.17	7.17	7.17	7.17	2.52565	3.40619		34005	N/A	2.96	3.15	3.36	4.07	4.58	5.42	5.88	6.32	N/A	7.17	1993-02-05	1
1	1	1	1	1	7.18		7.18	7.18	7.18	7.18	7.18	7.18	7.18	7.18	7.18	7.18	7.18	2.48964	3.36616		34008	N/A	3	3.18	3.43	4.16	4.64	5.49	5.93	6.37	N/A	7.18	1993-02-08	1
1	1	1	1	1	7.2		7.2	7.2	7.2	7.2	7.2	7.2	7.2	7.2	7.2	7.2	7.2	2.48088	3.368		34009	N/A	2.99	3.19	3.47	4.2	4.72	5.55	5.98	6.41	N/A	7.2	1993-02-09	1
1	1	1	1	1	7.26		7.26	7.26	7.26	7.26	7.26	7.26	7.26	7.26	7.26	7.26	7.26	2.49516	3.39255		34010	N/A	3	3.22	3.5	4.27	4.79	5.63	6.06	6.4	N/A	7.26	1993-02-10	1
1	1	1	1	1	7.15		7.15	7.15	7.15	7.15	7.15	7.15	7.15	7.15	7.15	7.15	7.15	2.4471	3.33516		34011	N/A	2.98	3.18	3.44	4.2	4.72	5.58	6.02	6.37	N/A	7.15	1993-02-11	1
1	1	1	1	1	7.13		7.13	7.13	7.13	7.13	7.13	7.13	7.13	7.13	7.13	7.13	7.13	2.43536	3.31714		34012	N/A	2.99	3.18	3.43	4.2	4.7	5.57	6	6.35	N/A	7.13	1993-02-12	1
1	1	1	1	1	7.14		7.14	7.14	7.14	7.14	7.14	7.14	7.14	7.14	7.14	7.14	7.14	2.45637	3.332		34016	N/A	3	3.18	3.44	4.14	4.64	5.52	5.98	6.34	N/A	7.14	1993-02-16	1
1	1	1	1	1	7.11		7.11	7.11	7.11	7.11	7.11	7.11	7.11	7.11	7.11	7.11	7.11	2.4794	3.34788		34017	N/A	2.97	3.14	3.39	4.06	4.54	5.43	5.9	6.28	N/A	7.11	1993-02-17	1
1	1	1	1	1	7.02		7.02	7.02	7.02	7.02	7.02	7.02	7.02	7.02	7.02	7.02	7.02	2.47367	3.32485		34018	N/A	2.95	3.09	3.3	3.95	4.43	5.29	5.75	6.17	N/A	7.02	1993-02-18	1
1	1	1	1	1	7.01		7.01	7.01	7.01	7.01	7.01	7.01	7.01	7.01	7.01	7.01	7.01	2.45109	3.29408		34019	N/A	2.99	3.11	3.3	3.99	4.44	5.3	5.76	6.15	N/A	7.01	1993-02-19	1
1	1	1	1	1	6.95		6.95	6.95	6.95	6.95	6.95	6.95	6.95	6.95	6.95	6.95	6.95	2.40018	3.22423		34022	N/A	3.01	3.14	3.32	3.99	4.44	5.28	5.7	6.09	N/A	6.95	1993-02-22	1
1	1	1	1	1	6.83		6.83	6.83	6.83	6.83	6.83	6.83	6.83	6.83	6.83	6.83	6.83	2.3637	3.15486		34023	N/A	3	3.11	3.27	3.9	4.33	5.12	5.53	5.92	N/A	6.83	1993-02-23	1
1	1	1	1	1	6.88		6.88	6.88	6.88	6.88	6.88	6.88	6.88	6.88	6.88	6.88	6.88	2.36059	3.16319		34024	N/A	3.02	3.14	3.32	3.97	4.4	5.2	5.64	6.01	N/A	6.88	1993-02-24	1
1	1	1	1	1	6.89		6.89	6.89	6.89	6.89	6.89	6.89	6.89	6.89	6.89	6.89	6.89	2.3716	3.17834		34025	N/A	3.01	3.13	3.33	3.95	4.36	5.23	5.68	6.03	N/A	6.89	1993-02-25	1
1	1	1	1	1	6.9		6.9	6.9	6.9	6.9	6.9	6.9	6.9	6.9	6.9	6.9	6.9	2.38353	3.19269		34026	N/A	3.01	3.14	3.32	3.92	4.37	5.21	5.67	6.03	N/A	6.9	1993-02-26	1
1	1	1	1	1	6.83		6.83	6.83	6.83	6.83	6.83	6.83	6.83	6.83	6.83	6.83	6.83	2.35195	3.1375		34029	N/A	3.03	3.14	3.3	3.88	4.31	5.12	5.58	5.94	N/A	6.83	1993-03-01	1
1	1	1	1	1	6.84		6.84	6.84	6.84	6.84	6.84	6.84	6.84	6.84	6.84	6.84	6.84	2.35745	3.14416		34030	N/A	3.03	3.14	3.31	3.88	4.31	5.13	5.58	5.95	N/A	6.84	1993-03-02	1
1	1	1	1	1	6.78		6.78	6.78	6.78	6.78	6.78	6.78	6.78	6.78	6.78	6.78	6.78	2.349	3.125		34031	N/A	3	3.11	3.28	3.81	4.24	5.05	5.51	5.88	N/A	6.78	1993-03-03	1
1	1	1	1	1	6.73		6.73	6.73	6.73	6.73	6.73	6.73	6.73	6.73	6.73	6.73	6.73	2.34162	3.1128		34032	N/A	2.97	3.09	3.24	3.75	4.19	5	5.46	5.83	N/A	6.73	1993-03-04	1
1	1	1	1	1	6.76		6.76	6.76	6.76	6.76	6.76	6.76	6.76	6.76	6.76	6.76	6.76	2.26476	3.02999		34033	N/A	3.07	3.2	3.37	3.91	4.37	5.14	5.56	5.9	N/A	6.76	1993-03-05	1
1	1	1	1	1	6.72		6.72	6.72	6.72	6.72	6.72	6.72	6.72	6.72	6.72	6.72	6.72	2.23033	2.98601		34036	N/A	3.05	3.19	3.39	3.97	4.37	5.15	5.54	5.85	N/A	6.72	1993-03-08	1
1	1	1	1	1	6.73		6.73	6.73	6.73	6.73	6.73	6.73	6.73	6.73	6.73	6.73	6.73	2.21263	2.98129		34037	N/A	3.05	3.19	3.41	4.02	4.46	5.21	5.6	5.91	N/A	6.73	1993-03-09	1
1	1	1	1	1	6.75		6.75	6.75	6.75	6.75	6.75	6.75	6.75	6.75	6.75	6.75	6.75	2.21885	2.99834		34038	N/A	3.04	3.19	3.4	4.05	4.49	5.24	5.65	5.97	N/A	6.75	1993-03-10	1
1	1	1	1	1	6.75		6.75	6.75	6.75	6.75	6.75	6.75	6.75	6.75	6.75	6.75	6.75	2.23885	3.02635		34039	N/A	3.03	3.16	3.35	4.01	4.47	5.23	5.65	5.96	N/A	6.75	1993-03-11	1
1	1	1	1	1	6.86		6.86	6.86	6.86	6.86	6.86	6.86	6.86	6.86	6.86	6.86	6.86	2.27478	3.08755		34040	N/A	3.04	3.19	3.39	4.11	4.56	5.35	5.8	6.11	N/A	6.86	1993-03-12	1
1	1	1	1	1	6.91		6.91	6.91	6.91	6.91	6.91	6.91	6.91	6.91	6.91	6.91	6.91	2.29264	3.11733		34043	N/A	3.06	3.21	3.42	4.1	4.61	5.39	5.87	6.17	N/A	6.91	1993-03-15	1
1	1	1	1	1	6.87		6.87	6.87	6.87	6.87	6.87	6.87	6.87	6.87	6.87	6.87	6.87	2.30767	3.11493		34044	N/A	3.04	3.19	3.38	4.02	4.5	5.27	5.76	6.06	N/A	6.87	1993-03-16	1
1	1	1	1	1	6.86		6.86	6.86	6.86	6.86	6.86	6.86	6.86	6.86	6.86	6.86	6.86	2.32111	3.12023		34045	N/A	3.04	3.18	3.36	3.98	4.44	5.21	5.72	6.02	N/A	6.86	1993-03-17	1
1	1	1	1	1	6.8		6.8	6.8	6.8	6.8	6.8	6.8	6.8	6.8	6.8	6.8	6.8	2.32417	3.1124		34046	N/A	3.01	3.13	3.3	3.91	4.35	5.11	5.63	5.93	N/A	6.8	1993-03-18	1
1	1	1	1	1	6.81		6.81	6.81	6.81	6.81	6.81	6.81	6.81	6.81	6.81	6.81	6.81	2.30908	3.09744		34047	N/A	3.03	3.16	3.32	3.95	4.38	5.17	5.65	5.95	N/A	6.81	1993-03-19	1
1	1	1	1	1	6.81		6.81	6.81	6.81	6.81	6.81	6.81	6.81	6.81	6.81	6.81	6.81	2.32684	3.12657		34050	N/A	2.99	3.13	3.29	3.92	4.37	5.18	5.65	5.96	N/A	6.81	1993-03-22	1
1	1	1	1	1	6.77		6.77	6.77	6.77	6.77	6.77	6.77	6.77	6.77	6.77	6.77	6.77	2.31666	3.10544		34051	N/A	2.98	3.12	3.28	3.88	4.31	5.14	5.6	5.91	N/A	6.77	1993-03-23	1
1	1	1	1	1	6.81		6.81	6.81	6.81	6.81	6.81	6.81	6.81	6.81	6.81	6.81	6.81	2.32655	3.1274		34052	N/A	2.98	3.11	3.31	3.93	4.38	5.19	5.64	5.95	N/A	6.81	1993-03-24	1
1	1	1	1	1	6.83		6.83	6.83	6.83	6.83	6.83	6.83	6.83	6.83	6.83	6.83	6.83	2.34806	3.1587		34053	N/A	2.97	3.09	3.29	3.92	4.38	5.19	5.67	5.98	N/A	6.83	1993-03-25	1
1	1	1	1	1	6.94		6.94	6.94	6.94	6.94	6.94	6.94	6.94	6.94	6.94	6.94	6.94	2.37878	3.21242		34054	N/A	3	3.13	3.33	4.02	4.5	5.32	5.78	6.09	N/A	6.94	1993-03-26	1
1	1	1	1	1	6.9		6.9	6.9	6.9	6.9	6.9	6.9	6.9	6.9	6.9	6.9	6.9	2.36927	3.19205		34057	N/A	3	3.12	3.33	3.95	4.44	5.25	5.75	6.06	N/A	6.9	1993-03-29	1
1	1	1	1	1	6.91		6.91	6.91	6.91	6.91	6.91	6.91	6.91	6.91	6.91	6.91	6.91	2.40789	3.23173		34058	N/A	2.97	3.09	3.29	3.91	4.38	5.2	5.71	6.02	N/A	6.91	1993-03-30	1
1	1	1	1	1	6.93		6.93	6.93	6.93	6.93	6.93	6.93	6.93	6.93	6.93	6.93	6.93	2.40963	3.23849		34059	N/A	2.95	3.09	3.32	3.96	4.42	5.24	5.72	6.03	N/A	6.93	1993-03-31	1
1	1	1	1	1	6.97		6.97	6.97	6.97	6.97	6.97	6.97	6.97	6.97	6.97	6.97	6.97	2.44067	3.2753		34060	N/A	2.96	3.09	3.32	3.94	4.41	5.24	5.74	6.06	N/A	6.97	1993-04-01	1
1	1	1	1	1	7.06		7.06	7.06	7.06	7.06	7.06	7.06	7.06	7.06	7.06	7.06	7.06	2.48529	3.3437		34061	N/A	2.97	3.09	3.32	3.99	4.48	5.31	5.83	6.16	N/A	7.06	1993-04-02	1
1	1	1	1	1	7.04		7.04	7.04	7.04	7.04	7.04	7.04	7.04	7.04	7.04	7.04	7.04	2.484	3.33591		34064	N/A	2.97	3.09	3.3	3.96	4.45	5.27	5.79	6.13	N/A	7.04	1993-04-05	1
1	1	1	1	1	6.97		6.97	6.97	6.97	6.97	6.97	6.97	6.97	6.97	6.97	6.97	6.97	2.43775	3.26559		34065	N/A	2.98	3.09	3.35	3.93	4.39	5.22	5.73	6.08	N/A	6.97	1993-04-06	1
1	1	1	1	1	6.96		6.96	6.96	6.96	6.96	6.96	6.96	6.96	6.96	6.96	6.96	6.96	2.42702	3.25168		34066	N/A	2.98	3.13	3.33	3.93	4.39	5.23	5.72	6.07	N/A	6.96	1993-04-07	1
1	1	1	1	1	6.85		6.85	6.85	6.85	6.85	6.85	6.85	6.85	6.85	6.85	6.85	6.85	2.39133	3.19858		34067	N/A	2.96	3.1	3.25	3.85	4.3	5.13	5.62	5.97	N/A	6.85	1993-04-08	1
1	1	1	1	1	6.79		6.79	6.79	6.79	6.79	6.79	6.79	6.79	6.79	6.79	6.79	6.79	2.36437	3.1625		34071	N/A	2.94	3.09	3.23	3.82	4.27	5.09	5.57	5.92	N/A	6.79	1993-04-12	1
1	1	1	1	1	6.8		6.8	6.8	6.8	6.8	6.8	6.8	6.8	6.8	6.8	6.8	6.8	2.38083	3.18565		34072	N/A	2.91	3.07	3.22	3.82	4.27	5.1	5.55	5.93	N/A	6.8	1993-04-13	1
1	1	1	1	1	6.76		6.76	6.76	6.76	6.76	6.76	6.76	6.76	6.76	6.76	6.76	6.76	2.37461	3.17862		34073	N/A	2.88	3.04	3.19	3.78	4.24	5.07	5.51	5.9	N/A	6.76	1993-04-14	1
1	1	1	1	1	6.73		6.73	6.73	6.73	6.73	6.73	6.73	6.73	6.73	6.73	6.73	6.73	2.34374	3.13608		34074	N/A	2.9	3.05	3.22	3.79	4.24	5.06	5.49	5.88	N/A	6.73	1993-04-15	1
1	1	1	1	1	6.76		6.76	6.76	6.76	6.76	6.76	6.76	6.76	6.76	6.76	6.76	6.76	2.36296	3.16316		34075	N/A	2.9	3.05	3.21	3.8	4.26	5.08	5.51	5.89	N/A	6.76	1993-04-16	1
1	1	1	1	1	6.73		6.73	6.73	6.73	6.73	6.73	6.73	6.73	6.73	6.73	6.73	6.73	2.35229	3.15222		34078	N/A	2.87	3.03	3.21	3.78	4.25	5.07	5.49	5.87	N/A	6.73	1993-04-19	1
1	1	1	1	1	6.76		6.76	6.76	6.76	6.76	6.76	6.76	6.76	6.76	6.76	6.76	6.76	2.38675	3.19534		34079	N/A	2.85	3	3.19	3.78	4.24	5.07	5.49	5.87	N/A	6.76	1993-04-20	1
1	1	1	1	1	6.75		6.75	6.75	6.75	6.75	6.75	6.75	6.75	6.75	6.75	6.75	6.75	2.38436	3.19034		34080	N/A	2.86	3	3.17	3.77	4.23	5.05	5.48	5.86	N/A	6.75	1993-04-21	1
1	1	1	1	1	6.75		6.75	6.75	6.75	6.75	6.75	6.75	6.75	6.75	6.75	6.75	6.75	2.38615	3.18688		34081	N/A	2.88	3.01	3.17	3.75	4.21	5.04	5.46	5.85	N/A	6.75	1993-04-22	1
1	1	1	1	1	6.79		6.79	6.79	6.79	6.79	6.79	6.79	6.79	6.79	6.79	6.79	6.79	2.40629	3.21071		34082	N/A	2.9	3.03	3.18	3.75	4.21	5.06	5.49	5.89	N/A	6.79	1993-04-23	1
1	1	1	1	1	6.83		6.83	6.83	6.83	6.83	6.83	6.83	6.83	6.83	6.83	6.83	6.83	2.40663	3.21074		34085	N/A	2.95	3.05	3.23	3.79	4.25	5.09	5.53	5.94	N/A	6.83	1993-04-26	1
1	1	1	1	1	6.9		6.9	6.9	6.9	6.9	6.9	6.9	6.9	6.9	6.9	6.9	6.9	2.41586	3.2329		34086	N/A	2.97	3.09	3.27	3.88	4.33	5.19	5.62	6.02	N/A	6.9	1993-04-27	1
1	1	1	1	1	6.91		6.91	6.91	6.91	6.91	6.91	6.91	6.91	6.91	6.91	6.91	6.91	2.42337	3.24549		34087	N/A	2.98	3.08	3.27	3.86	4.35	5.18	5.64	6.03	N/A	6.91	1993-04-28	1
1	1	1	1	1	6.88		6.88	6.88	6.88	6.88	6.88	6.88	6.88	6.88	6.88	6.88	6.88	2.43256	3.24593		34088	N/A	2.96	3.07	3.24	3.79	4.28	5.1	5.58	5.99	N/A	6.88	1993-04-29	1
1	1	1	1	1	6.95		6.95	6.95	6.95	6.95	6.95	6.95	6.95	6.95	6.95	6.95	6.95	2.46975	3.29379		34089	N/A	2.97	3.07	3.26	3.83	4.3	5.14	5.63	6.05	N/A	6.95	1993-04-30	1
1	1	1	1	1	6.86		6.86	6.86	6.86	6.86	6.86	6.86	6.86	6.86	6.86	6.86	6.86	2.44049	3.24982		34092	N/A	2.93	3.06	3.22	3.75	4.23	5.06	5.54	5.96	N/A	6.86	1993-05-03	1
1	1	1	1	1	6.81		6.81	6.81	6.81	6.81	6.81	6.81	6.81	6.81	6.81	6.81	6.81	2.40493	3.20303		34093	N/A	2.93	3.06	3.23	3.75	4.23	5.04	5.49	5.92	N/A	6.81	1993-05-04	1
1	1	1	1	1	6.82		6.82	6.82	6.82	6.82	6.82	6.82	6.82	6.82	6.82	6.82	6.82	2.38997	3.18617		34094	N/A	2.95	3.08	3.26	3.8	4.27	5.07	5.51	5.93	N/A	6.82	1993-05-05	1
1	1	1	1	1	6.8		6.8	6.8	6.8	6.8	6.8	6.8	6.8	6.8	6.8	6.8	6.8	2.39481	3.19165		34095	N/A	2.92	3.05	3.22	3.8	4.24	5.03	5.52	5.89	N/A	6.8	1993-05-06	1
1	1	1	1	1	6.85		6.85	6.85	6.85	6.85	6.85	6.85	6.85	6.85	6.85	6.85	6.85	2.42596	3.23105		34096	N/A	2.93	3.06	3.23	3.79	4.25	5.04	5.57	5.92	N/A	6.85	1993-05-07	1
1	1	1	1	1	6.81		6.81	6.81	6.81	6.81	6.81	6.81	6.81	6.81	6.81	6.81	6.81	2.39535	3.18813		34099	N/A	2.95	3.08	3.22	3.79	4.24	5.02	5.53	5.89	N/A	6.81	1993-05-10	1
1	1	1	1	1	6.82		6.82	6.82	6.82	6.82	6.82	6.82	6.82	6.82	6.82	6.82	6.82	2.39979	3.19245		34100	N/A	2.95	3.09	3.23	3.79	4.25	5.03	5.51	5.89	N/A	6.82	1993-05-11	1
1	1	1	1	1	6.86		6.86	6.86	6.86	6.86	6.86	6.86	6.86	6.86	6.86	6.86	6.86	2.41132	3.21324		34101	N/A	2.96	3.09	3.26	3.82	4.28	5.07	5.57	5.96	N/A	6.86	1993-05-12	1
1	1	1	1	1	6.96		6.96	6.96	6.96	6.96	6.96	6.96	6.96	6.96	6.96	6.96	6.96	2.4499	3.2644		34102	N/A	2.99	3.11	3.3	3.91	4.35	5.15	5.63	6.02	N/A	6.96	1993-05-13	1
1	1	1	1	1	6.95		6.95	6.95	6.95	6.95	6.95	6.95	6.95	6.95	6.95	6.95	6.95	2.41037	3.21842		34103	N/A	3.03	3.15	3.33	3.97	4.38	5.21	5.67	6.03	N/A	6.95	1993-05-14	1
1	1	1	1	1	6.97		6.97	6.97	6.97	6.97	6.97	6.97	6.97	6.97	6.97	6.97	6.97	2.37376	3.1771		34106	N/A	3.08	3.21	3.41	4.05	4.47	5.27	5.72	6.07	N/A	6.97	1993-05-17	1
1	1	1	1	1	7.02		7.02	7.02	7.02	7.02	7.02	7.02	7.02	7.02	7.02	7.02	7.02	2.40299	3.22068		34107	N/A	3.08	3.2	3.4	4.08	4.49	5.3	5.78	6.15	N/A	7.02	1993-05-18	1
1	1	1	1	1	6.98		6.98	6.98	6.98	6.98	6.98	6.98	6.98	6.98	6.98	6.98	6.98	2.40325	3.22035		34108	N/A	3.03	3.17	3.37	4.03	4.45	5.26	5.73	6.11	N/A	6.98	1993-05-19	1
1	1	1	1	1	6.99		6.99	6.99	6.99	6.99	6.99	6.99	6.99	6.99	6.99	6.99	6.99	2.41209	3.22714		34109	N/A	3.03	3.16	3.39	4.03	4.45	5.25	5.71	6.09	N/A	6.99	1993-05-20	1
1	1	1	1	1	7.03		7.03	7.03	7.03	7.03	7.03	7.03	7.03	7.03	7.03	7.03	7.03	2.39066	3.20757		34110	N/A	3.07	3.21	3.45	4.14	4.53	5.34	5.78	6.16	N/A	7.03	1993-05-21	1
1	1	1	1	1	6.99		6.99	6.99	6.99	6.99	6.99	6.99	6.99	6.99	6.99	6.99	6.99	2.30971	3.10383		34113	N/A	3.15	3.31	3.52	4.19	4.59	5.37	5.79	6.16	N/A	6.99	1993-05-24	1
1	1	1	1	1	7.01		7.01	7.01	7.01	7.01	7.01	7.01	7.01	7.01	7.01	7.01	7.01	2.32638	3.12645		34114	N/A	3.14	3.3	3.52	4.19	4.59	5.38	5.81	6.17	N/A	7.01	1993-05-25	1
1	1	1	1	1	6.94		6.94	6.94	6.94	6.94	6.94	6.94	6.94	6.94	6.94	6.94	6.94	2.28573	3.07443		34115	N/A	3.12	3.28	3.51	4.2	4.57	5.35	5.76	6.12	N/A	6.94	1993-05-26	1
1	1	1	1	1	6.93		6.93	6.93	6.93	6.93	6.93	6.93	6.93	6.93	6.93	6.93	6.93	2.25641	3.03443		34116	N/A	3.13	3.32	3.58	4.22	4.6	5.35	5.76	6.11	N/A	6.93	1993-05-27	1
1	1	1	1	1	6.98		6.98	6.98	6.98	6.98	6.98	6.98	6.98	6.98	6.98	6.98	6.98	2.28025	3.06644		34117	N/A	3.13	3.32	3.62	4.24	4.63	5.37	5.8	6.16	N/A	6.98	1993-05-28	1
1	1	1	1	1	6.88		6.88	6.88	6.88	6.88	6.88	6.88	6.88	6.88	6.88	6.88	6.88	2.24321	3.00969		34121	N/A	3.14	3.3	3.55	4.16	4.54	5.28	5.71	6.07	N/A	6.88	1993-06-01	1
1	1	1	1	1	6.88		6.88	6.88	6.88	6.88	6.88	6.88	6.88	6.88	6.88	6.88	6.88	2.23877	3.00388		34122	N/A	3.14	3.3	3.56	4.18	4.57	5.27	5.69	6.06	N/A	6.88	1993-06-02	1
1	1	1	1	1	6.86		6.86	6.86	6.86	6.86	6.86	6.86	6.86	6.86	6.86	6.86	6.86	2.25307	3.01705		34123	N/A	3.1	3.27	3.53	4.14	4.52	5.23	5.64	6.02	N/A	6.86	1993-06-03	1
1	1	1	1	1	6.91		6.91	6.91	6.91	6.91	6.91	6.91	6.91	6.91	6.91	6.91	6.91	2.19434	2.95164		34124	N/A	3.18	3.39	3.67	4.31	4.67	5.36	5.75	6.11	N/A	6.91	1993-06-04	1
1	1	1	1	1	6.88		6.88	6.88	6.88	6.88	6.88	6.88	6.88	6.88	6.88	6.88	6.88	2.17433	2.92377		34127	N/A	3.2	3.4	3.65	4.3	4.66	5.34	5.73	6.08	N/A	6.88	1993-06-07	1
1	1	1	1	1	6.91		6.91	6.91	6.91	6.91	6.91	6.91	6.91	6.91	6.91	6.91	6.91	2.18803	2.94289		34128	N/A	3.2	3.4	3.66	4.33	4.7	5.35	5.74	6.09	N/A	6.91	1993-06-08	1
1	1	1	1	1	6.87		6.87	6.87	6.87	6.87	6.87	6.87	6.87	6.87	6.87	6.87	6.87	2.17964	2.93547		34129	N/A	3.18	3.37	3.62	4.29	4.67	5.33	5.72	6.07	N/A	6.87	1993-06-09	1
1	1	1	1	1	6.88		6.88	6.88	6.88	6.88	6.88	6.88	6.88	6.88	6.88	6.88	6.88	2.18826	2.94673		34130	N/A	3.18	3.36	3.62	4.29	4.67	5.34	5.72	6.07	N/A	6.88	1993-06-10	1
1	1	1	1	1	6.8		6.8	6.8	6.8	6.8	6.8	6.8	6.8	6.8	6.8	6.8	6.8	2.20606	2.95903		34131	N/A	3.12	3.28	3.51	4.15	4.53	5.22	5.61	5.97	N/A	6.8	1993-06-11	1
1	1	1	1	1	6.81		6.81	6.81	6.81	6.81	6.81	6.81	6.81	6.81	6.81	6.81	6.81	2.21867	2.97126		34134	N/A	3.13	3.28	3.5	4.13	4.52	5.2	5.6	5.97	N/A	6.81	1993-06-14	1
1	1	1	1	1	6.83		6.83	6.83	6.83	6.83	6.83	6.83	6.83	6.83	6.83	6.83	6.83	2.24947	3.00671		34135	N/A	3.12	3.25	3.48	4.11	4.49	5.19	5.59	5.96	N/A	6.83	1993-06-15	1
1	1	1	1	1	6.82		6.82	6.82	6.82	6.82	6.82	6.82	6.82	6.82	6.82	6.82	6.82	2.24922	3.00614		34136	N/A	3.11	3.25	3.47	4.09	4.47	5.18	5.59	5.96	N/A	6.82	1993-06-16	1
1	1	1	1	1	6.81		6.81	6.81	6.81	6.81	6.81	6.81	6.81	6.81	6.81	6.81	6.81	2.24948	3.00614		34137	N/A	3.1	3.24	3.46	4.08	4.47	5.17	5.57	5.93	N/A	6.81	1993-06-17	1
1	1	1	1	1	6.82		6.82	6.82	6.82	6.82	6.82	6.82	6.82	6.82	6.82	6.82	6.82	2.21663	2.9703		34138	N/A	3.13	3.28	3.52	4.16	4.53	5.23	5.62	5.97	N/A	6.82	1993-06-18	1
1	1	1	1	1	6.78		6.78	6.78	6.78	6.78	6.78	6.78	6.78	6.78	6.78	6.78	6.78	2.1873	2.92486		34141	N/A	3.17	3.28	3.52	4.16	4.51	5.2	5.57	5.92	N/A	6.78	1993-06-21	1
1	1	1	1	1	6.78		6.78	6.78	6.78	6.78	6.78	6.78	6.78	6.78	6.78	6.78	6.78	2.19191	2.93375		34142	N/A	3.16	3.27	3.51	4.15	4.51	5.21	5.58	5.91	N/A	6.78	1993-06-22	1
1	1	1	1	1	6.77		6.77	6.77	6.77	6.77	6.77	6.77	6.77	6.77	6.77	6.77	6.77	2.15739	2.88541		34143	N/A	3.19	3.32	3.56	4.2	4.54	5.2	5.59	5.91	N/A	6.77	1993-06-23	1
1	1	1	1	1	6.74		6.74	6.74	6.74	6.74	6.74	6.74	6.74	6.74	6.74	6.74	6.74	2.15831	2.8819		34144	N/A	3.17	3.3	3.54	4.15	4.49	5.16	5.55	5.88	N/A	6.74	1993-06-24	1
1	1	1	1	1	6.71		6.71	6.71	6.71	6.71	6.71	6.71	6.71	6.71	6.71	6.71	6.71	2.16072	2.88287		34145	N/A	3.15	3.28	3.5	4.1	4.45	5.13	5.51	5.84	N/A	6.71	1993-06-25	1
1	1	1	1	1	6.67		6.67	6.67	6.67	6.67	6.67	6.67	6.67	6.67	6.67	6.67	6.67	2.16148	2.88303		34148	N/A	3.11	3.23	3.47	4.06	4.41	5.08	5.47	5.8	N/A	6.67	1993-06-28	1
1	1	1	1	1	6.67		6.67	6.67	6.67	6.67	6.67	6.67	6.67	6.67	6.67	6.67	6.67	2.17907	2.90016		34149	N/A	3.1	3.21	3.45	4.03	4.37	5.05	5.45	5.79	N/A	6.67	1993-06-29	1
1	1	1	1	1	6.68		6.68	6.68	6.68	6.68	6.68	6.68	6.68	6.68	6.68	6.68	6.68	2.18273	2.90666		34150	N/A	3.1	3.22	3.45	4.03	4.39	5.05	5.46	5.8	N/A	6.68	1993-06-30	1
1	1	1	1	1	6.69		6.69	6.69	6.69	6.69	6.69	6.69	6.69	6.69	6.69	6.69	6.69	2.21329	2.94874		34151	N/A	3.06	3.19	3.41	3.99	4.37	5.04	5.46	5.8	N/A	6.69	1993-07-01	1
1	1	1	1	1	6.67		6.67	6.67	6.67	6.67	6.67	6.67	6.67	6.67	6.67	6.67	6.67	2.23862	2.97689		34152	N/A	3.02	3.15	3.34	3.93	4.31	4.98	5.42	5.76	N/A	6.67	1993-07-02	1
1	1	1	1	1	6.68		6.68	6.68	6.68	6.68	6.68	6.68	6.68	6.68	6.68	6.68	6.68	2.18826	2.91394		34156	N/A	3.12	3.22	3.42	4	4.38	5.04	5.47	5.8	N/A	6.68	1993-07-06	1
1	1	1	1	1	6.68		6.68	6.68	6.68	6.68	6.68	6.68	6.68	6.68	6.68	6.68	6.68	2.19127	2.91891		34157	N/A	3.11	3.2	3.43	4	4.38	5.04	5.47	5.8	N/A	6.68	1993-07-07	1
1	1	1	1	1	6.66		6.66	6.66	6.66	6.66	6.66	6.66	6.66	6.66	6.66	6.66	6.66	2.18434	2.90588		34158	N/A	3.09	3.21	3.42	4	4.35	5.02	5.45	5.78	N/A	6.66	1993-07-08	1
1	1	1	1	1	6.64		6.64	6.64	6.64	6.64	6.64	6.64	6.64	6.64	6.64	6.64	6.64	2.1767	2.89399		34159	N/A	3.09	3.21	3.41	3.98	4.34	5	5.42	5.76	N/A	6.64	1993-07-09	1
1	1	1	1	1	6.62		6.62	6.62	6.62	6.62	6.62	6.62	6.62	6.62	6.62	6.62	6.62	2.16008	2.87178		34162	N/A	3.1	3.22	3.4	3.99	4.33	5	5.41	5.75	N/A	6.62	1993-07-12	1
1	1	1	1	1	6.62		6.62	6.62	6.62	6.62	6.62	6.62	6.62	6.62	6.62	6.62	6.62	2.13347	2.84414		34163	N/A	3.11	3.25	3.44	4.04	4.39	5.03	5.43	5.78	N/A	6.62	1993-07-13	1
1	1	1	1	1	6.56		6.56	6.56	6.56	6.56	6.56	6.56	6.56	6.56	6.56	6.56	6.56	2.12336	2.827		34164	N/A	3.08	3.22	3.4	3.97	4.32	4.98	5.37	5.72	N/A	6.56	1993-07-14	1
1	1	1	1	1	6.55		6.55	6.55	6.55	6.55	6.55	6.55	6.55	6.55	6.55	6.55	6.55	2.1079	2.80986		34165	N/A	3.08	3.23	3.41	3.99	4.34	4.99	5.37	5.72	N/A	6.55	1993-07-15	1
1	1	1	1	1	6.54		6.54	6.54	6.54	6.54	6.54	6.54	6.54	6.54	6.54	6.54	6.54	2.10089	2.80097		34166	N/A	3.08	3.23	3.41	3.99	4.34	4.99	5.36	5.71	N/A	6.54	1993-07-16	1
1	1	1	1	1	6.54		6.54	6.54	6.54	6.54	6.54	6.54	6.54	6.54	6.54	6.54	6.54	2.08999	2.78651		34169	N/A	3.12	3.24	3.42	3.99	4.35	5	5.37	5.71	N/A	6.54	1993-07-19	1
1	1	1	1	1	6.55		6.55	6.55	6.55	6.55	6.55	6.55	6.55	6.55	6.55	6.55	6.55	2.0556	2.75194		34170	N/A	3.13	3.28	3.48	4.09	4.42	5.08	5.42	5.75	N/A	6.55	1993-07-20	1
1	1	1	1	1	6.62		6.62	6.62	6.62	6.62	6.62	6.62	6.62	6.62	6.62	6.62	6.62	2.075	2.78963		34171	N/A	3.14	3.29	3.52	4.15	4.49	5.17	5.53	5.83	N/A	6.62	1993-07-21	1
1	1	1	1	1	6.65		6.65	6.65	6.65	6.65	6.65	6.65	6.65	6.65	6.65	6.65	6.65	2.04893	2.76705		34172	N/A	3.16	3.34	3.61	4.22	4.59	5.24	5.6	5.9	N/A	6.65	1993-07-22	1
1	1	1	1	1	6.71		6.71	6.71	6.71	6.71	6.71	6.71	6.71	6.71	6.71	6.71	6.71	2.08135	2.8128		34173	N/A	3.16	3.34	3.62	4.25	4.62	5.28	5.66	5.95	N/A	6.71	1993-07-23	1
1	1	1	1	1	6.68		6.68	6.68	6.68	6.68	6.68	6.68	6.68	6.68	6.68	6.68	6.68	2.07328	2.79794		34176	N/A	3.17	3.33	3.59	4.22	4.58	5.25	5.62	5.93	N/A	6.68	1993-07-26	1
1	1	1	1	1	6.68		6.68	6.68	6.68	6.68	6.68	6.68	6.68	6.68	6.68	6.68	6.68	2.06173	2.78109		34177	N/A	3.17	3.36	3.61	4.25	4.59	5.26	5.62	5.92	N/A	6.68	1993-07-27	1
1	1	1	1	1	6.66		6.66	6.66	6.66	6.66	6.66	6.66	6.66	6.66	6.66	6.66	6.66	2.06545	2.7846		34178	N/A	3.15	3.34	3.59	4.21	4.57	5.23	5.58	5.9	N/A	6.66	1993-07-28	1
1	1	1	1	1	6.57		6.57	6.57	6.57	6.57	6.57	6.57	6.57	6.57	6.57	6.57	6.57	2.05855	2.76769		34179	N/A	3.09	3.28	3.51	4.12	4.46	5.13	5.47	5.81	N/A	6.57	1993-07-29	1
1	1	1	1	1	6.57		6.57	6.57	6.57	6.57	6.57	6.57	6.57	6.57	6.57	6.57	6.57	2.04552	2.75899		34180	N/A	3.1	3.28	3.53	4.13	4.5	5.16	5.5	5.83	N/A	6.57	1993-07-30	1
1	1	1	1	1	6.56		6.56	6.56	6.56	6.56	6.56	6.56	6.56	6.56	6.56	6.56	6.56	1.99334	2.6942		34183	N/A	3.17	3.35	3.58	4.19	4.55	5.2	5.55	5.85	N/A	6.56	1993-08-02	1
1	1	1	1	1	6.53		6.53	6.53	6.53	6.53	6.53	6.53	6.53	6.53	6.53	6.53	6.53	1.98552	2.68771		34184	N/A	3.15	3.32	3.56	4.17	4.55	5.19	5.51	5.83	N/A	6.53	1993-08-03	1
1	1	1	1	1	6.54		6.54	6.54	6.54	6.54	6.54	6.54	6.54	6.54	6.54	6.54	6.54	1.98976	2.69614		34185	N/A	3.15	3.32	3.57	4.16	4.55	5.2	5.54	5.87	N/A	6.54	1993-08-04	1
1	1	1	1	1	6.53		6.53	6.53	6.53	6.53	6.53	6.53	6.53	6.53	6.53	6.53	6.53	2.00503	2.71327		34186	N/A	3.12	3.3	3.54	4.12	4.5	5.18	5.52	5.86	N/A	6.53	1993-08-05	1
1	1	1	1	1	6.53		6.53	6.53	6.53	6.53	6.53	6.53	6.53	6.53	6.53	6.53	6.53	2.01857	2.7303		34187	N/A	3.11	3.28	3.52	4.09	4.48	5.16	5.52	5.86	N/A	6.53	1993-08-06	1
1	1	1	1	1	6.47		6.47	6.47	6.47	6.47	6.47	6.47	6.47	6.47	6.47	6.47	6.47	1.99197	2.69599		34190	N/A	3.11	3.26	3.48	4.06	4.45	5.12	5.48	5.82	N/A	6.47	1993-08-09	1
1	1	1	1	1	6.45		6.45	6.45	6.45	6.45	6.45	6.45	6.45	6.45	6.45	6.45	6.45	1.96368	2.66462		34191	N/A	3.1	3.27	3.51	4.1	4.48	5.14	5.49	5.82	N/A	6.45	1993-08-10	1
1	1	1	1	1	6.44		6.44	6.44	6.44	6.44	6.44	6.44	6.44	6.44	6.44	6.44	6.44	1.9668	2.66525		34192	N/A	3.09	3.25	3.5	4.1	4.47	5.13	5.46	5.75	N/A	6.44	1993-08-11	1
1	1	1	1	1	6.37		6.37	6.37	6.37	6.37	6.37	6.37	6.37	6.37	6.37	6.37	6.37	1.92828	2.62411		34193	N/A	3.08	3.23	3.47	4.06	4.43	5.13	5.47	5.77	N/A	6.37	1993-08-12	1
1	1	1	1	1	6.35		6.35	6.35	6.35	6.35	6.35	6.35	6.35	6.35	6.35	6.35	6.35	1.93644	2.62577		34194	N/A	3.09	3.22	3.43	4	4.38	5.08	5.41	5.72	N/A	6.35	1993-08-13	1
1	1	1	1	1	6.31		6.31	6.31	6.31	6.31	6.31	6.31	6.31	6.31	6.31	6.31	6.31	1.917	2.59596		34197	N/A	3.1	3.21	3.42	3.98	4.35	5.05	5.36	5.68	N/A	6.31	1993-08-16	1
1	1	1	1	1	6.31		6.31	6.31	6.31	6.31	6.31	6.31	6.31	6.31	6.31	6.31	6.31	1.90749	2.59158		34198	N/A	3.08	3.21	3.43	4.02	4.39	5.07	5.39	5.7	N/A	6.31	1993-08-17	1
1	1	1	1	1	6.26		6.26	6.26	6.26	6.26	6.26	6.26	6.26	6.26	6.26	6.26	6.26	1.88933	2.57099		34199	N/A	3.05	3.19	3.41	3.98	4.36	5.04	5.37	5.69	N/A	6.26	1993-08-18	1
1	1	1	1	1	6.21		6.21	6.21	6.21	6.21	6.21	6.21	6.21	6.21	6.21	6.21	6.21	1.87174	2.53758		34200	N/A	3.05	3.2	3.39	3.93	4.29	4.97	5.32	5.64	N/A	6.21	1993-08-19	1
1	1	1	1	1	6.22		6.22	6.22	6.22	6.22	6.22	6.22	6.22	6.22	6.22	6.22	6.22	1.88118	2.54397		34201	N/A	3.06	3.2	3.39	3.93	4.29	4.96	5.28	5.61	N/A	6.22	1993-08-20	1
1	1	1	1	1	6.22		6.22	6.22	6.22	6.22	6.22	6.22	6.22	6.22	6.22	6.22	6.22	1.86904	2.52724		34204	N/A	3.08	3.21	3.4	3.97	4.3	4.98	5.28	5.6	N/A	6.22	1993-08-23	1
1	1	1	1	1	6.2		6.2	6.2	6.2	6.2	6.2	6.2	6.2	6.2	6.2	6.2	6.2	1.89237	2.54734		34205	N/A	3.05	3.18	3.36	3.89	4.24	4.9	5.21	5.54	N/A	6.2	1993-08-24	1
1	1	1	1	1	6.18		6.18	6.18	6.18	6.18	6.18	6.18	6.18	6.18	6.18	6.18	6.18	1.89327	2.54155		34206	N/A	3.04	3.18	3.35	3.85	4.2	4.86	5.17	5.51	N/A	6.18	1993-08-25	1
1	1	1	1	1	6.09		6.09	6.09	6.09	6.09	6.09	6.09	6.09	6.09	6.09	6.09	6.09	1.83839	2.46196		34207	N/A	3.06	3.19	3.34	3.82	4.16	4.78	5.1	5.42	N/A	6.09	1993-08-26	1
1	1	1	1	1	6.13		6.13	6.13	6.13	6.13	6.13	6.13	6.13	6.13	6.13	6.13	6.13	1.84084	2.46731		34208	N/A	3.09	3.21	3.38	3.87	4.2	4.83	5.13	5.48	N/A	6.13	1993-08-27	1
1	1	1	1	1	6.12		6.12	6.12	6.12	6.12	6.12	6.12	6.12	6.12	6.12	6.12	6.12	1.85053	2.47415		34211	N/A	3.08	3.19	3.35	3.86	4.18	4.78	5.1	5.44	N/A	6.12	1993-08-30	1
1	1	1	1	1	6.09		6.09	6.09	6.09	6.09	6.09	6.09	6.09	6.09	6.09	6.09	6.09	1.81381	2.43239		34212	N/A	3.08	3.21	3.38	3.88	4.2	4.8	5.11	5.45	N/A	6.09	1993-08-31	1
1	1	1	1	1	6.09		6.09	6.09	6.09	6.09	6.09	6.09	6.09	6.09	6.09	6.09	6.09	1.81703	2.4416		34213	N/A	3.08	3.19	3.36	3.88	4.21	4.81	5.12	5.46	N/A	6.09	1993-09-01	1
1	1	1	1	1	6.04		6.04	6.04	6.04	6.04	6.04	6.04	6.04	6.04	6.04	6.04	6.04	1.80318	2.42049		34214	N/A	3.05	3.18	3.34	3.83	4.16	4.76	5.09	5.41	N/A	6.04	1993-09-02	1
1	1	1	1	1	5.95		5.95	5.95	5.95	5.95	5.95	5.95	5.95	5.95	5.95	5.95	5.95	1.80026	2.40911		34215	N/A	3	3.12	3.25	3.71	4.04	4.65	5.01	5.31	N/A	5.95	1993-09-03	1
1	1	1	1	1	5.88		5.88	5.88	5.88	5.88	5.88	5.88	5.88	5.88	5.88	5.88	5.88	1.75488	2.34398		34219	N/A	3.01	3.12	3.26	3.7	4.01	4.6	4.96	5.23	N/A	5.88	1993-09-07	1
1	1	1	1	1	5.86		5.86	5.86	5.86	5.86	5.86	5.86	5.86	5.86	5.86	5.86	5.86	1.70858	2.28857		34220	N/A	3.02	3.15	3.32	3.78	4.07	4.63	4.96	5.23	N/A	5.86	1993-09-08	1
1	1	1	1	1	5.96		5.96	5.96	5.96	5.96	5.96	5.96	5.96	5.96	5.96	5.96	5.96	1.73541	2.33621		34221	N/A	3.04	3.18	3.37	3.88	4.18	4.74	5.06	5.35	N/A	5.96	1993-09-09	1
1	1	1	1	1	5.89		5.89	5.89	5.89	5.89	5.89	5.89	5.89	5.89	5.89	5.89	5.89	1.71911	2.3116		34222	N/A	3.02	3.15	3.32	3.8	4.11	4.67	5.01	5.29	N/A	5.89	1993-09-10	1
1	1	1	1	1	5.86		5.86	5.86	5.86	5.86	5.86	5.86	5.86	5.86	5.86	5.86	5.86	1.68832	2.27178		34225	N/A	3.04	3.16	3.33	3.82	4.13	4.66	4.99	5.26	N/A	5.86	1993-09-13	1
1	1	1	1	1	5.97		5.97	5.97	5.97	5.97	5.97	5.97	5.97	5.97	5.97	5.97	5.97	1.72305	2.32842		34226	N/A	3.05	3.18	3.41	3.91	4.23	4.77	5.12	5.37	N/A	5.97	1993-09-14	1
1	1	1	1	1	6		6	6	6	6	6	6	6	6	6	6	6	1.76224	2.3753		34227	N/A	3.02	3.16	3.39	3.89	4.19	4.75	5.14	5.39	N/A	6	1993-09-15	1
1	1	1	1	1	6.01		6.01	6.01	6.01	6.01	6.01	6.01	6.01	6.01	6.01	6.01	6.01	1.77484	2.38846		34228	N/A	3.01	3.16	3.39	3.88	4.19	4.74	5.12	5.37	N/A	6.01	1993-09-16	1
1	1	1	1	1	6.04		6.04	6.04	6.04	6.04	6.04	6.04	6.04	6.04	6.04	6.04	6.04	1.79519	2.41093		34229	N/A	3.01	3.17	3.39	3.89	4.19	4.75	5.11	5.38	N/A	6.04	1993-09-17	1
1	1	1	1	1	6.08		6.08	6.08	6.08	6.08	6.08	6.08	6.08	6.08	6.08	6.08	6.08	1.81489	2.44161		34232	N/A	3	3.16	3.41	3.92	4.23	4.79	5.13	5.42	N/A	6.08	1993-09-20	1
1	1	1	1	1	6.14		6.14	6.14	6.14	6.14	6.14	6.14	6.14	6.14	6.14	6.14	6.14	1.87065	2.51479		34233	N/A	2.98	3.14	3.38	3.9	4.21	4.8	5.19	5.47	N/A	6.14	1993-09-21	1
1	1	1	1	1	6.1		6.1	6.1	6.1	6.1	6.1	6.1	6.1	6.1	6.1	6.1	6.1	1.83667	2.47471		34234	N/A	2.98	3.15	3.39	3.9	4.22	4.81	5.17	5.45	N/A	6.1	1993-09-22	1
1	1	1	1	1	6.06		6.06	6.06	6.06	6.06	6.06	6.06	6.06	6.06	6.06	6.06	6.06	1.80979	2.44205		34235	N/A	2.99	3.15	3.39	3.87	4.22	4.8	5.15	5.42	N/A	6.06	1993-09-23	1
1	1	1	1	1	6.06		6.06	6.06	6.06	6.06	6.06	6.06	6.06	6.06	6.06	6.06	6.06	1.80634	2.4367		34236	N/A	2.99	3.15	3.39	3.9	4.22	4.81	5.14	5.42	N/A	6.06	1993-09-24	1
1	1	1	1	1	5.97		5.97	5.97	5.97	5.97	5.97	5.97	5.97	5.97	5.97	5.97	5.97	1.79435	2.4077		34239	N/A	2.96	3.1	3.32	3.81	4.12	4.69	5.01	5.3	N/A	5.97	1993-09-27	1
1	1	1	1	1	5.94		5.94	5.94	5.94	5.94	5.94	5.94	5.94	5.94	5.94	5.94	5.94	1.77453	2.3799		34240	N/A	2.96	3.12	3.32	3.79	4.11	4.67	4.98	5.28	N/A	5.94	1993-09-28	1
1	1	1	1	1	6		6	6	6	6	6	6	6	6	6	6	6	1.78491	2.40074		34241	N/A	2.99	3.15	3.36	3.84	4.19	4.74	5.03	5.35	N/A	6	1993-09-29	1
1	1	1	1	1	6.04		6.04	6.04	6.04	6.04	6.04	6.04	6.04	6.04	6.04	6.04	6.04	1.79782	2.42803		34242	N/A	2.98	3.13	3.39	3.89	4.24	4.79	5.11	5.4	N/A	6.04	1993-09-30	1
1	1	1	1	1	5.98		5.98	5.98	5.98	5.98	5.98	5.98	5.98	5.98	5.98	5.98	5.98	1.78103	2.39722		34243	N/A	2.98	3.11	3.35	3.84	4.18	4.72	5.03	5.34	6.12	5.98	1993-10-01	1
1	1	1	1	1	5.99		5.99	5.99	5.99	5.99	5.99	5.99	5.99	5.99	5.99	5.99	5.99	1.77474	2.38002		34246	N/A	3.02	3.17	3.35	3.85	4.16	4.71	5.04	5.34	6.1	5.99	1993-10-04	1
1	1	1	1	1	6.01		6.01	6.01	6.01	6.01	6.01	6.01	6.01	6.01	6.01	6.01	6.01	1.7715	2.37226		34247	N/A	3.06	3.2	3.38	3.86	4.18	4.72	5.05	5.35	6.12	6.01	1993-10-05	1
1	1	1	1	1	6.01		6.01	6.01	6.01	6.01	6.01	6.01	6.01	6.01	6.01	6.01	6.01	1.78298	2.38585		34248	N/A	3.04	3.19	3.36	3.85	4.16	4.7	5.05	5.35	6.12	6.01	1993-10-06	1
1	1	1	1	1	6.01		6.01	6.01	6.01	6.01	6.01	6.01	6.01	6.01	6.01	6.01	6.01	1.79015	2.39396		34249	N/A	3.05	3.17	3.35	3.83	4.15	4.69	5.05	5.33	6.11	6.01	1993-10-07	1
1	1	1	1	1	5.92		5.92	5.92	5.92	5.92	5.92	5.92	5.92	5.92	5.92	5.92	5.92	1.74706	2.3299		34250	N/A	3.05	3.16	3.33	3.78	4.09	4.61	4.96	5.26	6.02	5.92	1993-10-08	1
1	1	1	1	1	5.92		5.92	5.92	5.92	5.92	5.92	5.92	5.92	5.92	5.92	5.92	5.92	1.71616	2.28682		34254	N/A	3.12	3.21	3.36	3.82	4.11	4.64	4.97	5.27	6.02	5.92	1993-10-12	1
1	1	1	1	1	5.92		5.92	5.92	5.92	5.92	5.92	5.92	5.92	5.92	5.92	5.92	5.92	1.71791	2.29045		34255	N/A	3.1	3.2	3.36	3.84	4.11	4.64	4.98	5.27	6.03	5.92	1993-10-13	1
1	1	1	1	1	5.86		5.86	5.86	5.86	5.86	5.86	5.86	5.86	5.86	5.86	5.86	5.86	1.68669	2.25044		34256	N/A	3.08	3.18	3.36	3.82	4.09	4.61	4.93	5.23	5.98	5.86	1993-10-14	1
1	1	1	1	1	5.78		5.78	5.78	5.78	5.78	5.78	5.78	5.78	5.78	5.78	5.78	5.78	1.63478	2.18338		34257	N/A	3.08	3.18	3.35	3.81	4.06	4.57	4.9	5.19	5.91	5.78	1993-10-15	1
1	1	1	1	1	5.85		5.85	5.85	5.85	5.85	5.85	5.85	5.85	5.85	5.85	5.85	5.85	1.64566	2.20701		34260	N/A	3.13	3.23	3.39	3.84	4.14	4.66	4.99	5.27	5.99	5.85	1993-10-18	1
1	1	1	1	1	5.85		5.85	5.85	5.85	5.85	5.85	5.85	5.85	5.85	5.85	5.85	5.85	1.64146	2.20101		34261	N/A	3.13	3.24	3.39	3.86	4.14	4.66	5	5.27	5.98	5.85	1993-10-19	1
1	1	1	1	1	5.83		5.83	5.83	5.83	5.83	5.83	5.83	5.83	5.83	5.83	5.83	5.83	1.63671	2.19517		34262	N/A	3.11	3.22	3.38	3.86	4.13	4.64	4.98	5.26	5.97	5.83	1993-10-20	1
1	1	1	1	1	5.92		5.92	5.92	5.92	5.92	5.92	5.92	5.92	5.92	5.92	5.92	5.92	1.67712	2.25567		34263	N/A	3.12	3.25	3.4	3.89	4.19	4.72	5.07	5.35	6.06	5.92	1993-10-21	1
1	1	1	1	1	5.98		5.98	5.98	5.98	5.98	5.98	5.98	5.98	5.98	5.98	5.98	5.98	1.70838	2.3034		34264	N/A	3.11	3.25	3.42	3.91	4.23	4.76	5.15	5.42	6.13	5.98	1993-10-22	1
1	1	1	1	1	6.02		6.02	6.02	6.02	6.02	6.02	6.02	6.02	6.02	6.02	6.02	6.02	1.71121	2.31049		34267	N/A	3.14	3.28	3.45	3.95	4.26	4.82	5.21	5.47	6.17	6.02	1993-10-25	1
1	1	1	1	1	6		6	6	6	6	6	6	6	6	6	6	6	1.69912	2.28898		34268	N/A	3.16	3.29	3.45	3.93	4.25	4.79	5.17	5.43	6.14	6	1993-10-26	1
1	1	1	1	1	6		6	6	6	6	6	6	6	6	6	6	6	1.68552	2.2763		34269	N/A	3.15	3.29	3.47	3.99	4.28	4.82	5.19	5.44	6.15	6	1993-10-27	1
1	1	1	1	1	5.97		5.97	5.97	5.97	5.97	5.97	5.97	5.97	5.97	5.97	5.97	5.97	1.67226	2.26564		34270	N/A	3.11	3.28	3.47	3.97	4.29	4.83	5.17	5.41	6.11	5.97	1993-10-28	1
1	1	1	1	1	5.96		5.96	5.96	5.96	5.96	5.96	5.96	5.96	5.96	5.96	5.96	5.96	1.66173	2.25579		34271	N/A	3.1	3.28	3.47	3.99	4.3	4.83	5.19	5.43	6.12	5.96	1993-10-29	1
1	1	1	1	1	6.02		6.02	6.02	6.02	6.02	6.02	6.02	6.02	6.02	6.02	6.02	6.02	1.63495	2.23559		34274	N/A	3.18	3.36	3.53	4.11	4.42	4.96	5.32	5.56	6.19	6.02	1993-11-01	1
1	1	1	1	1	6.07		6.07	6.07	6.07	6.07	6.07	6.07	6.07	6.07	6.07	6.07	6.07	1.64043	2.25073		34275	N/A	3.19	3.38	3.59	4.16	4.49	5.02	5.41	5.63	6.28	6.07	1993-11-02	1
1	1	1	1	1	6.11		6.11	6.11	6.11	6.11	6.11	6.11	6.11	6.11	6.11	6.11	6.11	1.69039	2.3127		34276	N/A	3.16	3.35	3.56	4.13	4.46	5.01	5.39	5.67	6.32	6.11	1993-11-03	1
1	1	1	1	1	6.19		6.19	6.19	6.19	6.19	6.19	6.19	6.19	6.19	6.19	6.19	6.19	1.75207	2.3907		34277	N/A	3.15	3.34	3.55	4.13	4.47	5.03	5.42	5.67	6.34	6.19	1993-11-04	1
1	1	1	1	1	6.22		6.22	6.22	6.22	6.22	6.22	6.22	6.22	6.22	6.22	6.22	6.22	1.7487	2.39907		34278	N/A	3.13	3.36	3.58	4.2	4.53	5.11	5.5	5.75	6.4	6.22	1993-11-05	1
1	1	1	1	1	6.22		6.22	6.22	6.22	6.22	6.22	6.22	6.22	6.22	6.22	6.22	6.22	1.7683	2.40983		34281	N/A	3.17	3.35	3.55	4.13	4.47	5.04	5.44	5.7	6.38	6.22	1993-11-08	1
1	1	1	1	1	6.16		6.16	6.16	6.16	6.16	6.16	6.16	6.16	6.16	6.16	6.16	6.16	1.72568	2.35569		34282	N/A	3.18	3.36	3.54	4.12	4.47	5.02	5.41	5.64	6.31	6.16	1993-11-09	1
1	1	1	1	1	6.21		6.21	6.21	6.21	6.21	6.21	6.21	6.21	6.21	6.21	6.21	6.21	1.74357	2.38441		34283	N/A	3.19	3.36	3.56	4.17	4.51	5.08	5.45	5.72	6.38	6.21	1993-11-10	1
1	1	1	1	1	6.15		6.15	6.15	6.15	6.15	6.15	6.15	6.15	6.15	6.15	6.15	6.15	1.72288	2.35094		34285	N/A	3.18	3.35	3.54	4.11	4.45	5.02	5.39	5.66	6.33	6.15	1993-11-12	1
1	1	1	1	1	6.17		6.17	6.17	6.17	6.17	6.17	6.17	6.17	6.17	6.17	6.17	6.17	1.72932	2.36186		34288	N/A	3.18	3.36	3.56	4.11	4.49	5.02	5.4	5.69	6.36	6.17	1993-11-15	1
1	1	1	1	1	6.17		6.17	6.17	6.17	6.17	6.17	6.17	6.17	6.17	6.17	6.17	6.17	1.74526	2.37344		34289	N/A	3.16	3.34	3.56	4.1	4.45	4.98	5.35	5.66	6.35	6.17	1993-11-16	1
1	1	1	1	1	6.19		6.19	6.19	6.19	6.19	6.19	6.19	6.19	6.19	6.19	6.19	6.19	1.76676	2.3975		34290	N/A	3.16	3.33	3.55	4.09	4.42	4.99	5.35	5.65	6.35	6.19	1993-11-17	1
1	1	1	1	1	6.23		6.23	6.23	6.23	6.23	6.23	6.23	6.23	6.23	6.23	6.23	6.23	1.76374	2.40387		34291	N/A	3.18	3.35	3.59	4.15	4.49	5.06	5.43	5.72	6.4	6.23	1993-11-18	1
1	1	1	1	1	6.34		6.34	6.34	6.34	6.34	6.34	6.34	6.34	6.34	6.34	6.34	6.34	1.80432	2.46599		34292	N/A	3.2	3.38	3.64	4.22	4.58	5.16	5.54	5.84	6.5	6.34	1993-11-19	1
1	1	1	1	1	6.36		6.36	6.36	6.36	6.36	6.36	6.36	6.36	6.36	6.36	6.36	6.36	1.80085	2.46731		34295	N/A	3.21	3.4	3.65	4.26	4.61	5.2	5.6	5.89	6.53	6.36	1993-11-22	1
1	1	1	1	1	6.3		6.3	6.3	6.3	6.3	6.3	6.3	6.3	6.3	6.3	6.3	6.3	1.79067	2.44945		34296	N/A	3.19	3.37	3.6	4.19	4.55	5.14	5.52	5.82	6.46	6.3	1993-11-23	1
1	1	1	1	1	6.31		6.31	6.31	6.31	6.31	6.31	6.31	6.31	6.31	6.31	6.31	6.31	1.80228	2.46243		34297	N/A	3.19	3.36	3.6	4.18	4.54	5.11	5.54	5.84	6.47	6.31	1993-11-24	1
1	1	1	1	1	6.26		6.26	6.26	6.26	6.26	6.26	6.26	6.26	6.26	6.26	6.26	6.26	1.77766	2.42853		34299	N/A	3.18	3.36	3.58	4.16	4.52	5.08	5.49	5.78	6.43	6.26	1993-11-26	1
1	1	1	1	1	6.23		6.23	6.23	6.23	6.23	6.23	6.23	6.23	6.23	6.23	6.23	6.23	1.75068	2.38835		34302	N/A	3.2	3.37	3.6	4.17	4.49	5.08	5.46	5.76	6.4	6.23	1993-11-29	1
1	1	1	1	1	6.29		6.29	6.29	6.29	6.29	6.29	6.29	6.29	6.29	6.29	6.29	6.29	1.76425	2.41218		34303	N/A	3.21	3.4	3.65	4.22	4.55	5.15	5.53	5.83	6.46	6.29	1993-11-30	1
1	1	1	1	1	6.28		6.28	6.28	6.28	6.28	6.28	6.28	6.28	6.28	6.28	6.28	6.28	1.77252	2.42562		34304	N/A	3.19	3.37	3.62	4.2	4.54	5.14	5.52	5.82	6.44	6.28	1993-12-01	1
1	1	1	1	1	6.27		6.27	6.27	6.27	6.27	6.27	6.27	6.27	6.27	6.27	6.27	6.27	1.76399	2.41831		34305	N/A	3.18	3.36	3.62	4.22	4.55	5.16	5.52	5.81	6.42	6.27	1993-12-02	1
1	1	1	1	1	6.25		6.25	6.25	6.25	6.25	6.25	6.25	6.25	6.25	6.25	6.25	6.25	1.74186	2.39484		34306	N/A	3.18	3.37	3.62	4.24	4.59	5.16	5.52	5.8	6.39	6.25	1993-12-03	1
1	1	1	1	1	6.17		6.17	6.17	6.17	6.17	6.17	6.17	6.17	6.17	6.17	6.17	6.17	1.71203	2.34592		34309	N/A	3.18	3.36	3.57	4.19	4.5	5.09	5.43	5.72	6.31	6.17	1993-12-06	1
1	1	1	1	1	6.17		6.17	6.17	6.17	6.17	6.17	6.17	6.17	6.17	6.17	6.17	6.17	1.71112	2.34781		34310	N/A	3.16	3.36	3.6	4.17	4.52	5.1	5.43	5.71	6.31	6.17	1993-12-07	1
1	1	1	1	1	6.17		6.17	6.17	6.17	6.17	6.17	6.17	6.17	6.17	6.17	6.17	6.17	1.71628	2.35108		34311	N/A	3.15	3.35	3.6	4.18	4.5	5.09	5.41	5.71	6.31	6.17	1993-12-08	1
1	1	1	1	1	6.15		6.15	6.15	6.15	6.15	6.15	6.15	6.15	6.15	6.15	6.15	6.15	1.70974	2.34094		34312	N/A	3.13	3.34	3.6	4.18	4.49	5.07	5.38	5.68	6.29	6.15	1993-12-09	1
1	1	1	1	1	6.19		6.19	6.19	6.19	6.19	6.19	6.19	6.19	6.19	6.19	6.19	6.19	1.72505	2.3695		34313	N/A	3.12	3.34	3.62	4.21	4.53	5.13	5.45	5.73	6.34	6.19	1993-12-10	1
1	1	1	1	1	6.24		6.24	6.24	6.24	6.24	6.24	6.24	6.24	6.24	6.24	6.24	6.24	1.7505	2.40555		34316	N/A	3.12	3.36	3.62	4.23	4.56	5.16	5.5	5.78	6.4	6.24	1993-12-13	1
1	1	1	1	1	6.29		6.29	6.29	6.29	6.29	6.29	6.29	6.29	6.29	6.29	6.29	6.29	1.7808	2.44921		34317	N/A	3.11	3.35	3.63	4.25	4.59	5.2	5.54	5.82	6.46	6.29	1993-12-14	1
1	1	1	1	1	6.29		6.29	6.29	6.29	6.29	6.29	6.29	6.29	6.29	6.29	6.29	6.29	1.79058	2.46357		34318	N/A	3.1	3.34	3.61	4.22	4.58	5.19	5.55	5.83	6.46	6.29	1993-12-15	1
1	1	1	1	1	6.31		6.31	6.31	6.31	6.31	6.31	6.31	6.31	6.31	6.31	6.31	6.31	1.80628	2.48415		34319	N/A	3.1	3.33	3.6	4.23	4.58	5.2	5.56	5.84	6.47	6.31	1993-12-16	1
1	1	1	1	1	6.29		6.29	6.29	6.29	6.29	6.29	6.29	6.29	6.29	6.29	6.29	6.29	1.80745	2.48085		34320	N/A	3.09	3.32	3.58	4.2	4.54	5.17	5.52	5.81	6.44	6.29	1993-12-17	1
1	1	1	1	1	6.3		6.3	6.3	6.3	6.3	6.3	6.3	6.3	6.3	6.3	6.3	6.3	1.78677	2.45473		34323	N/A	3.15	3.36	3.61	4.22	4.58	5.2	5.54	5.83	6.45	6.3	1993-12-20	1
1	1	1	1	1	6.32		6.32	6.32	6.32	6.32	6.32	6.32	6.32	6.32	6.32	6.32	6.32	1.79861	2.47089		34324	N/A	3.14	3.34	3.62	4.26	4.58	5.22	5.56	5.85	6.47	6.32	1993-12-21	1
1	1	1	1	1	6.22		6.22	6.22	6.22	6.22	6.22	6.22	6.22	6.22	6.22	6.22	6.22	1.76041	2.41298		34325	N/A	3.13	3.3	3.59	4.19	4.5	5.13	5.46	5.74	6.37	6.22	1993-12-22	1
1	1	1	1	1	6.22		6.22	6.22	6.22	6.22	6.22	6.22	6.22	6.22	6.22	6.22	6.22	1.7676	2.41709		34326	N/A	3.13	3.29	3.59	4.18	4.49	5.1	5.42	5.72	6.36	6.22	1993-12-23	1
1	1	1	1	1	6.23		6.23	6.23	6.23	6.23	6.23	6.23	6.23	6.23	6.23	6.23	6.23	1.76705	2.41337		34330	N/A	3.13	3.31	3.61	4.2	4.5	5.09	5.42	5.72	6.36	6.23	1993-12-27	1
1	1	1	1	1	6.24		6.24	6.24	6.24	6.24	6.24	6.24	6.24	6.24	6.24	6.24	6.24	1.7748	2.42197		34331	N/A	3.13	3.32	3.6	4.2	4.49	5.1	5.42	5.72	6.36	6.24	1993-12-28	1
1	1	1	1	1	6.25		6.25	6.25	6.25	6.25	6.25	6.25	6.25	6.25	6.25	6.25	6.25	1.78921	2.44853		34332	N/A	3.08	3.3	3.6	4.2	4.51	5.12	5.44	5.74	6.38	6.25	1993-12-29	1
1	1	1	1	1	6.34		6.34	6.34	6.34	6.34	6.34	6.34	6.34	6.34	6.34	6.34	6.34	1.83843	2.52339		34333	N/A	3.04	3.31	3.62	4.25	4.58	5.2	5.53	5.82	6.47	6.34	1993-12-30	1
1	1	1	1	1	6.35		6.35	6.35	6.35	6.35	6.35	6.35	6.35	6.35	6.35	6.35	6.35	1.84049	2.52465		34334	N/A	3.07	3.3	3.63	4.25	4.58	5.21	5.53	5.83	6.48	6.35	1993-12-31	1
1	1	1	1	1	6.41		6.41	6.41	6.41	6.41	6.41	6.41	6.41	6.41	6.41	6.41	6.41	1.82854	2.51565		34337	N/A	3.16	3.39	3.67	4.3	4.66	5.29	5.66	5.92	6.54	6.41	1994-01-03	1
1	1	1	1	1	6.37		6.37	6.37	6.37	6.37	6.37	6.37	6.37	6.37	6.37	6.37	6.37	1.81346	2.49372		34338	N/A	3.15	3.37	3.65	4.29	4.63	5.26	5.62	5.88	6.51	6.37	1994-01-04	1
1	1	1	1	1	6.4		6.4	6.4	6.4	6.4	6.4	6.4	6.4	6.4	6.4	6.4	6.4	1.83146	2.51972		34339	N/A	3.14	3.36	3.66	4.31	4.66	5.27	5.64	5.9	6.54	6.4	1994-01-05	1
1	1	1	1	1	6.36		6.36	6.36	6.36	6.36	6.36	6.36	6.36	6.36	6.36	6.36	6.36	1.83108	2.51066		34340	N/A	3.12	3.33	3.65	4.24	4.59	5.21	5.57	5.84	6.48	6.36	1994-01-06	1
1	1	1	1	1	6.24		6.24	6.24	6.24	6.24	6.24	6.24	6.24	6.24	6.24	6.24	6.24	1.82577	2.48602		34341	N/A	3.07	3.25	3.54	4.09	4.43	5.03	5.39	5.7	6.35	6.24	1994-01-07	1
1	1	1	1	1	6.24		6.24	6.24	6.24	6.24	6.24	6.24	6.24	6.24	6.24	6.24	6.24	1.8349	2.49248		34344	N/A	3.06	3.25	3.53	4.08	4.41	5.01	5.36	5.67	6.35	6.24	1994-01-10	1
1	1	1	1	1	6.25		6.25	6.25	6.25	6.25	6.25	6.25	6.25	6.25	6.25	6.25	6.25	1.84985	2.5108		34345	N/A	3.04	3.25	3.51	4.08	4.41	5	5.34	5.67	6.34	6.25	1994-01-11	1
1	1	1	1	1	6.17		6.17	6.17	6.17	6.17	6.17	6.17	6.17	6.17	6.17	6.17	6.17	1.8176	2.46854		34346	N/A	3.02	3.21	3.47	4.05	4.36	4.95	5.29	5.6	6.26	6.17	1994-01-12	1
1	1	1	1	1	6.26		6.26	6.26	6.26	6.26	6.26	6.26	6.26	6.26	6.26	6.26	6.26	1.84588	2.52383		34347	N/A	3.01	3.22	3.52	4.13	4.47	5.08	5.41	5.71	6.36	6.26	1994-01-13	1
1	1	1	1	1	6.3		6.3	6.3	6.3	6.3	6.3	6.3	6.3	6.3	6.3	6.3	6.3	1.85379	2.53839		34348	N/A	3.03	3.23	3.55	4.17	4.51	5.12	5.46	5.78	6.41	6.3	1994-01-14	1
1	1	1	1	1	6.28		6.28	6.28	6.28	6.28	6.28	6.28	6.28	6.28	6.28	6.28	6.28	1.84938	2.52754		34352	N/A	3.04	3.23	3.53	4.14	4.48	5.09	5.43	5.74	6.38	6.28	1994-01-18	1
1	1	1	1	1	6.3		6.3	6.3	6.3	6.3	6.3	6.3	6.3	6.3	6.3	6.3	6.3	1.87219	2.55578		34353	N/A	3.03	3.22	3.52	4.12	4.47	5.08	5.43	5.76	6.4	6.3	1994-01-19	1
1	1	1	1	1	6.27		6.27	6.27	6.27	6.27	6.27	6.27	6.27	6.27	6.27	6.27	6.27	1.88124	2.56102		34354	N/A	3.01	3.19	3.47	4.07	4.41	5.02	5.38	5.71	6.36	6.27	1994-01-20	1
1	1	1	1	1	6.29		6.29	6.29	6.29	6.29	6.29	6.29	6.29	6.29	6.29	6.29	6.29	1.88191	2.56394		34355	N/A	3.01	3.21	3.5	4.09	4.44	5.05	5.39	5.73	6.36	6.29	1994-01-21	1
1	1	1	1	1	6.3		6.3	6.3	6.3	6.3	6.3	6.3	6.3	6.3	6.3	6.3	6.3	1.88536	2.568		34358	N/A	3.01	3.23	3.5	4.09	4.44	5.06	5.4	5.74	6.38	6.3	1994-01-24	1
1	1	1	1	1	6.34		6.34	6.34	6.34	6.34	6.34	6.34	6.34	6.34	6.34	6.34	6.34	1.91035	2.60294		34359	N/A	2.99	3.23	3.51	4.11	4.46	5.08	5.43	5.78	6.4	6.34	1994-01-25	1
1	1	1	1	1	6.33		6.33	6.33	6.33	6.33	6.33	6.33	6.33	6.33	6.33	6.33	6.33	1.9015	2.59132		34360	N/A	2.98	3.22	3.53	4.13	4.46	5.09	5.41	5.77	6.39	6.33	1994-01-26	1
1	1	1	1	1	6.27		6.27	6.27	6.27	6.27	6.27	6.27	6.27	6.27	6.27	6.27	6.27	1.8656	2.5438		34361	N/A	2.98	3.22	3.52	4.11	4.45	5.04	5.37	5.73	6.33	6.27	1994-01-27	1
1	1	1	1	1	6.21		6.21	6.21	6.21	6.21	6.21	6.21	6.21	6.21	6.21	6.21	6.21	1.83998	2.50455		34362	N/A	2.99	3.2	3.49	4.08	4.4	4.99	5.3	5.68	6.27	6.21	1994-01-28	1
1	1	1	1	1	6.23		6.23	6.23	6.23	6.23	6.23	6.23	6.23	6.23	6.23	6.23	6.23	1.82108	2.47931		34365	N/A	3.05	3.25	3.53	4.12	4.44	5.02	5.34	5.7	6.29	6.23	1994-01-31	1
1	1	1	1	1	6.31		6.31	6.31	6.31	6.31	6.31	6.31	6.31	6.31	6.31	6.31	6.31	1.83211	2.49883		34366	N/A	3.1	3.29	3.6	4.2	4.53	5.1	5.43	5.77	6.37	6.31	1994-02-01	1
1	1	1	1	1	6.29		6.29	6.29	6.29	6.29	6.29	6.29	6.29	6.29	6.29	6.29	6.29	1.80859	2.46885		34367	N/A	3.13	3.3	3.61	4.2	4.53	5.11	5.43	5.77	6.36	6.29	1994-02-02	1
1	1	1	1	1	6.31		6.31	6.31	6.31	6.31	6.31	6.31	6.31	6.31	6.31	6.31	6.31	1.76482	2.41218		34368	N/A	3.2	3.37	3.73	4.28	4.6	5.17	5.48	5.81	6.38	6.31	1994-02-03	1
1	1	1	1	1	6.37		6.37	6.37	6.37	6.37	6.37	6.37	6.37	6.37	6.37	6.37	6.37	1.71653	2.36316		34369	N/A	3.3	3.49	3.84	4.42	4.75	5.32	5.62	5.94	6.49	6.37	1994-02-04	1
1	1	1	1	1	6.38		6.38	6.38	6.38	6.38	6.38	6.38	6.38	6.38	6.38	6.38	6.38	1.71847	2.3732		34372	N/A	3.31	3.49	3.83	4.41	4.78	5.36	5.65	5.96	6.5	6.38	1994-02-07	1
1	1	1	1	1	6.44		6.44	6.44	6.44	6.44	6.44	6.44	6.44	6.44	6.44	6.44	6.44	1.7443	2.40731		34373	N/A	3.32	3.51	3.86	4.44	4.82	5.38	5.7	6.01	6.55	6.44	1994-02-08	1
1	1	1	1	1	6.43		6.43	6.43	6.43	6.43	6.43	6.43	6.43	6.43	6.43	6.43	6.43	1.7488	2.40716		34374	N/A	3.32	3.49	3.85	4.43	4.8	5.35	5.67	5.92	6.52	6.43	1994-02-09	1
1	1	1	1	1	6.45		6.45	6.45	6.45	6.45	6.45	6.45	6.45	6.45	6.45	6.45	6.45	1.75112	2.40946		34375	N/A	3.33	3.52	3.86	4.45	4.83	5.36	5.68	5.91	6.53	6.45	1994-02-10	1
1	1	1	1	1	6.41		6.41	6.41	6.41	6.41	6.41	6.41	6.41	6.41	6.41	6.41	6.41	1.73128	2.38253		34376	N/A	3.33	3.51	3.84	4.44	4.8	5.34	5.66	5.88	6.5	6.41	1994-02-11	1
1	1	1	1	1	6.45		6.45	6.45	6.45	6.45	6.45	6.45	6.45	6.45	6.45	6.45	6.45	1.75427	2.41069		34379	N/A	3.34	3.52	3.85	4.44	4.81	5.36	5.67	5.9	6.53	6.45	1994-02-14	1
1	1	1	1	1	6.45		6.45	6.45	6.45	6.45	6.45	6.45	6.45	6.45	6.45	6.45	6.45	1.75877	2.41312		34380	N/A	3.34	3.51	3.85	4.44	4.8	5.34	5.66	5.88	6.53	6.45	1994-02-15	1
1	1	1	1	1	6.46		6.46	6.46	6.46	6.46	6.46	6.46	6.46	6.46	6.46	6.46	6.46	1.76223	2.41737		34381	N/A	3.34	3.52	3.86	4.44	4.8	5.35	5.67	5.89	6.53	6.46	1994-02-16	1
1	1	1	1	1	6.54		6.54	6.54	6.54	6.54	6.54	6.54	6.54	6.54	6.54	6.54	6.54	1.7872	2.46172		34382	N/A	3.35	3.55	3.89	4.5	4.88	5.45	5.77	6	6.62	6.54	1994-02-17	1
1	1	1	1	1	6.63		6.63	6.63	6.63	6.63	6.63	6.63	6.63	6.63	6.63	6.63	6.63	1.81985	2.50871		34383	N/A	3.36	3.59	3.93	4.57	4.94	5.52	5.87	6.09	6.7	6.63	1994-02-18	1
1	1	1	1	1	6.6		6.6	6.6	6.6	6.6	6.6	6.6	6.6	6.6	6.6	6.6	6.6	1.78721	2.45973		34387	N/A	3.4	3.64	3.93	4.57	4.93	5.5	5.84	6.05	6.67	6.6	1994-02-22	1
1	1	1	1	1	6.65		6.65	6.65	6.65	6.65	6.65	6.65	6.65	6.65	6.65	6.65	6.65	1.76735	2.44002		34388	N/A	3.46	3.7	4.01	4.67	5.02	5.59	5.92	6.13	6.73	6.65	1994-02-23	1
1	1	1	1	1	6.75		6.75	6.75	6.75	6.75	6.75	6.75	6.75	6.75	6.75	6.75	6.75	1.82159	2.5162		34389	N/A	3.44	3.72	4.03	4.72	5.07	5.66	6.01	6.22	6.82	6.75	1994-02-24	1
1	1	1	1	1	6.73		6.73	6.73	6.73	6.73	6.73	6.73	6.73	6.73	6.73	6.73	6.73	1.80413	2.49426		34390	N/A	3.44	3.72	4.05	4.72	5.08	5.65	6	6.21	6.8	6.73	1994-02-25	1
1	1	1	1	1	6.67		6.67	6.67	6.67	6.67	6.67	6.67	6.67	6.67	6.67	6.67	6.67	1.77158	2.4459		34393	N/A	3.47	3.72	4.03	4.67	5.04	5.6	5.94	6.15	6.75	6.67	1994-02-28	1
1	1	1	1	1	6.79		6.79	6.79	6.79	6.79	6.79	6.79	6.79	6.79	6.79	6.79	6.79	1.76825	2.44795		34394	N/A	3.58	3.82	4.16	4.81	5.19	5.74	6.08	6.28	6.86	6.79	1994-03-01	1
1	1	1	1	1	6.79		6.79	6.79	6.79	6.79	6.79	6.79	6.79	6.79	6.79	6.79	6.79	1.77801	2.46606		34395	N/A	3.55	3.8	4.15	4.79	5.2	5.74	6.09	6.3	6.87	6.79	1994-03-02	1
1	1	1	1	1	6.84		6.84	6.84	6.84	6.84	6.84	6.84	6.84	6.84	6.84	6.84	6.84	1.79067	2.48095		34396	N/A	3.56	3.83	4.21	4.83	5.21	5.79	6.14	6.35	6.92	6.84	1994-03-03	1
1	1	1	1	1	6.85		6.85	6.85	6.85	6.85	6.85	6.85	6.85	6.85	6.85	6.85	6.85	1.76065	2.4455		34397	N/A	3.62	3.87	4.26	4.88	5.29	5.82	6.16	6.38	6.92	6.85	1994-03-04	1
1	1	1	1	1	6.8		6.8	6.8	6.8	6.8	6.8	6.8	6.8	6.8	6.8	6.8	6.8	1.73712	2.40966		34400	N/A	3.61	3.88	4.23	4.87	5.25	5.77	6.12	6.32	6.87	6.8	1994-03-07	1
1	1	1	1	1	6.85		6.85	6.85	6.85	6.85	6.85	6.85	6.85	6.85	6.85	6.85	6.85	1.74462	2.4249		34401	N/A	3.63	3.9	4.28	4.92	5.31	5.84	6.17	6.38	6.92	6.85	1994-03-08	1
1	1	1	1	1	6.85		6.85	6.85	6.85	6.85	6.85	6.85	6.85	6.85	6.85	6.85	6.85	1.74111	2.42181		34402	N/A	3.61	3.9	4.29	4.96	5.33	5.84	6.17	6.38	6.93	6.85	1994-03-09	1
1	1	1	1	1	6.94		6.94	6.94	6.94	6.94	6.94	6.94	6.94	6.94	6.94	6.94	6.94	1.80202	2.50952		34403	N/A	3.57	3.9	4.3	4.96	5.36	5.9	6.28	6.48	7.02	6.94	1994-03-10	1
1	1	1	1	1	6.91		6.91	6.91	6.91	6.91	6.91	6.91	6.91	6.91	6.91	6.91	6.91	1.78369	2.48384		34404	N/A	3.58	3.91	4.28	4.95	5.34	5.89	6.25	6.46	6.99	6.91	1994-03-11	1
1	1	1	1	1	6.93		6.93	6.93	6.93	6.93	6.93	6.93	6.93	6.93	6.93	6.93	6.93	1.75732	2.45072		34407	N/A	3.66	3.97	4.32	4.99	5.39	5.94	6.3	6.5	7.01	6.93	1994-03-14	1
1	1	1	1	1	6.9		6.9	6.9	6.9	6.9	6.9	6.9	6.9	6.9	6.9	6.9	6.9	1.74279	2.42918		34408	N/A	3.66	3.95	4.32	4.99	5.38	5.91	6.25	6.47	6.99	6.9	1994-03-15	1
1	1	1	1	1	6.82		6.82	6.82	6.82	6.82	6.82	6.82	6.82	6.82	6.82	6.82	6.82	1.71437	2.39271		34409	N/A	3.61	3.92	4.28	4.96	5.34	5.86	6.18	6.4	6.9	6.82	1994-03-16	1
1	1	1	1	1	6.82		6.82	6.82	6.82	6.82	6.82	6.82	6.82	6.82	6.82	6.82	6.82	1.72533	2.41201		34410	N/A	3.55	3.92	4.28	4.94	5.34	5.88	6.19	6.4	6.91	6.82	1994-03-17	1
1	1	1	1	1	6.9		6.9	6.9	6.9	6.9	6.9	6.9	6.9	6.9	6.9	6.9	6.9	1.73898	2.43611		34411	N/A	3.57	3.97	4.35	5.03	5.42	5.97	6.3	6.49	6.99	6.9	1994-03-18	1
1	1	1	1	1	6.94		6.94	6.94	6.94	6.94	6.94	6.94	6.94	6.94	6.94	6.94	6.94	1.71291	2.40197		34414	N/A	3.7	4.02	4.41	5.09	5.49	6.03	6.36	6.55	7.03	6.94	1994-03-21	1
1	1	1	1	1	6.85		6.85	6.85	6.85	6.85	6.85	6.85	6.85	6.85	6.85	6.85	6.85	1.71272	2.39555		34415	N/A	3.6	3.94	4.33	5.03	5.38	5.92	6.24	6.44	6.94	6.85	1994-03-22	1
1	1	1	1	1	6.85		6.85	6.85	6.85	6.85	6.85	6.85	6.85	6.85	6.85	6.85	6.85	1.73422	2.42825		34416	N/A	3.54	3.9	4.32	5	5.38	5.92	6.22	6.44	6.95	6.85	1994-03-23	1
1	1	1	1	1	6.98		6.98	6.98	6.98	6.98	6.98	6.98	6.98	6.98	6.98	6.98	6.98	1.79047	2.51747		34417	N/A	3.53	3.92	4.37	5.08	5.5	6.05	6.39	6.58	7.09	6.98	1994-03-24	1
1	1	1	1	1	6.99		6.99	6.99	6.99	6.99	6.99	6.99	6.99	6.99	6.99	6.99	6.99	1.78315	2.5102		34418	N/A	3.57	3.92	4.38	5.1	5.52	6.08	6.42	6.61	7.1	6.99	1994-03-25	1
1	1	1	1	1	6.98		6.98	6.98	6.98	6.98	6.98	6.98	6.98	6.98	6.98	6.98	6.98	1.75833	2.48003		34421	N/A	3.57	3.97	4.41	5.12	5.55	6.1	6.43	6.63	7.09	6.98	1994-03-28	1
1	1	1	1	1	7.06		7.06	7.06	7.06	7.06	7.06	7.06	7.06	7.06	7.06	7.06	7.06	1.78481	2.52128		34422	N/A	3.59	3.98	4.46	5.19	5.62	6.19	6.52	6.71	7.17	7.06	1994-03-29	1
1	1	1	1	1	7.1		7.1	7.1	7.1	7.1	7.1	7.1	7.1	7.1	7.1	7.1	7.1	1.81914	2.57606		34423	N/A	3.57	3.93	4.45	5.19	5.65	6.24	6.59	6.78	7.23	7.1	1994-03-30	1
1	1	1	1	1	7.11		7.11	7.11	7.11	7.11	7.11	7.11	7.11	7.11	7.11	7.11	7.11	1.82104	2.57685		34424	N/A	3.56	3.92	4.5	5.21	5.66	6.23	6.59	6.77	7.23	7.11	1994-03-31	1
1	1	1	1	1	7.43		7.43	7.43	7.43	7.43	7.43	7.43	7.43	7.43	7.43	7.43	7.43	1.82194	2.59805		34428	N/A	3.82	4.19	4.83	5.57	6.06	6.64	7.01	7.16	7.55	7.43	1994-04-04	1
1	1	1	1	1	7.28		7.28	7.28	7.28	7.28	7.28	7.28	7.28	7.28	7.28	7.28	7.28	1.78516	2.53862		34429	N/A	3.75	4.14	4.72	5.45	5.93	6.47	6.79	6.97	7.41	7.28	1994-04-05	1
1	1	1	1	1	7.25		7.25	7.25	7.25	7.25	7.25	7.25	7.25	7.25	7.25	7.25	7.25	1.80419	2.56441		34430	N/A	3.67	4.09	4.67	5.4	5.88	6.42	6.76	6.93	7.38	7.25	1994-04-06	1
1	1	1	1	1	7.21		7.21	7.21	7.21	7.21	7.21	7.21	7.21	7.21	7.21	7.21	7.21	1.80285	2.56164		34431	N/A	3.61	4.07	4.64	5.37	5.84	6.38	6.72	6.86	7.33	7.21	1994-04-07	1
1	1	1	1	1	7.26		7.26	7.26	7.26	7.26	7.26	7.26	7.26	7.26	7.26	7.26	7.26	1.80475	2.56994		34432	N/A	3.65	4.1	4.68	5.43	5.91	6.46	6.79	6.94	7.4	7.26	1994-04-08	1
1	1	1	1	1	7.24		7.24	7.24	7.24	7.24	7.24	7.24	7.24	7.24	7.24	7.24	7.24	1.77859	2.53228		34435	N/A	3.68	4.14	4.69	5.43	5.9	6.46	6.78	6.92	7.37	7.24	1994-04-11	1
1	1	1	1	1	7.2		7.2	7.2	7.2	7.2	7.2	7.2	7.2	7.2	7.2	7.2	7.2	1.77755	2.52639		34436	N/A	3.64	4.11	4.66	5.4	5.84	6.4	6.72	6.87	7.32	7.2	1994-04-12	1
1	1	1	1	1	7.26		7.26	7.26	7.26	7.26	7.26	7.26	7.26	7.26	7.26	7.26	7.26	1.80021	2.5634		34437	N/A	3.64	4.13	4.69	5.43	5.91	6.47	6.79	6.93	7.39	7.26	1994-04-13	1
1	1	1	1	1	7.29		7.29	7.29	7.29	7.29	7.29	7.29	7.29	7.29	7.29	7.29	7.29	1.80197	2.56688		34438	N/A	3.66	4.14	4.72	5.49	5.94	6.51	6.82	6.97	7.43	7.29	1994-04-14	1
1	1	1	1	1	7.29		7.29	7.29	7.29	7.29	7.29	7.29	7.29	7.29	7.29	7.29	7.29	1.794	2.55397		34439	N/A	3.68	4.15	4.73	5.51	5.95	6.5	6.79	6.97	7.42	7.29	1994-04-15	1
1	1	1	1	1	7.41		7.41	7.41	7.41	7.41	7.41	7.41	7.41	7.41	7.41	7.41	7.41	1.75044	2.50375		34442	N/A	3.84	4.34	4.91	5.7	6.15	6.7	6.99	7.14	7.55	7.41	1994-04-18	1
1	1	1	1	1	7.37		7.37	7.37	7.37	7.37	7.37	7.37	7.37	7.37	7.37	7.37	7.37	1.72322	2.46508		34443	N/A	3.83	4.36	4.92	5.7	6.14	6.68	6.92	7.1	7.5	7.37	1994-04-19	1
1	1	1	1	1	7.33		7.33	7.33	7.33	7.33	7.33	7.33	7.33	7.33	7.33	7.33	7.33	1.70872	2.4414		34444	N/A	3.83	4.34	4.91	5.67	6.1	6.62	6.88	7.05	7.46	7.33	1994-04-20	1
1	1	1	1	1	7.22		7.22	7.22	7.22	7.22	7.22	7.22	7.22	7.22	7.22	7.22	7.22	1.66278	2.36743		34445	N/A	3.83	4.33	4.87	5.59	6	6.49	6.71	6.91	7.33	7.22	1994-04-21	1
1	1	1	1	1	7.21		7.21	7.21	7.21	7.21	7.21	7.21	7.21	7.21	7.21	7.21	7.21	1.63764	2.33853		34446	N/A	3.84	4.36	4.9	5.62	6.04	6.53	6.73	6.93	7.34	7.21	1994-04-22	1
1	1	1	1	1	7.14		7.14	7.14	7.14	7.14	7.14	7.14	7.14	7.14	7.14	7.14	7.14	1.56897	2.23881		34449	N/A	3.94	4.4	4.91	5.61	6.01	6.48	6.68	6.86	7.26	7.14	1994-04-25	1
1	1	1	1	1	7.12		7.12	7.12	7.12	7.12	7.12	7.12	7.12	7.12	7.12	7.12	7.12	1.54948	2.20924		34450	N/A	3.97	4.41	4.93	5.59	5.99	6.46	6.66	6.86	7.24	7.12	1994-04-26	1
1	1	1	1	1	7.29		7.29	7.29	7.29	7.29	7.29	7.29	7.29	7.29	7.29	7.29	7.29	1.60694	2.2983		34452	N/A	3.98	4.45	5.05	5.75	6.14	6.65	6.86	7.04	7.41	7.29	1994-04-28	1
1	1	1	1	1	7.31		7.31	7.31	7.31	7.31	7.31	7.31	7.31	7.31	7.31	7.31	7.31	1.62046	2.31729		34453	N/A	3.97	4.45	5.07	5.73	6.16	6.64	6.88	7.06	7.44	7.31	1994-04-29	1
1	1	1	1	1	7.33		7.33	7.33	7.33	7.33	7.33	7.33	7.33	7.33	7.33	7.33	7.33	1.57144	2.247		34456	N/A	4.1	4.57	5.12	5.81	6.2	6.69	6.93	7.09	7.45	7.33	1994-05-02	1
1	1	1	1	1	7.35		7.35	7.35	7.35	7.35	7.35	7.35	7.35	7.35	7.35	7.35	7.35	1.55392	2.22583		34457	N/A	4.12	4.62	5.19	5.86	6.26	6.73	6.96	7.13	7.48	7.35	1994-05-03	1
1	1	1	1	1	7.35		7.35	7.35	7.35	7.35	7.35	7.35	7.35	7.35	7.35	7.35	7.35	1.53836	2.20485		34458	N/A	4.15	4.63	5.22	5.89	6.28	6.74	6.97	7.14	7.49	7.35	1994-05-04	1
1	1	1	1	1	7.33		7.33	7.33	7.33	7.33	7.33	7.33	7.33	7.33	7.33	7.33	7.33	1.53628	2.19914		34459	N/A	4.13	4.62	5.21	5.88	6.25	6.7	6.94	7.11	7.46	7.33	1994-05-05	1
1	1	1	1	1	7.53		7.53	7.53	7.53	7.53	7.53	7.53	7.53	7.53	7.53	7.53	7.53	1.53347	2.20463		34460	N/A	4.3	4.82	5.4	6.12	6.5	6.95	7.19	7.35	7.67	7.53	1994-05-06	1
1	1	1	1	1	7.63		7.63	7.63	7.63	7.63	7.63	7.63	7.63	7.63	7.63	7.63	7.63	1.49513	2.15367		34463	N/A	4.44	5.02	5.55	6.26	6.64	7.09	7.33	7.49	7.76	7.63	1994-05-09	1
1	1	1	1	1	7.5		7.5	7.5	7.5	7.5	7.5	7.5	7.5	7.5	7.5	7.5	7.5	1.47218	2.11576		34464	N/A	4.35	4.95	5.48	6.13	6.52	6.93	7.14	7.33	7.62	7.5	1994-05-10	1
1	1	1	1	1	7.6		7.6	7.6	7.6	7.6	7.6	7.6	7.6	7.6	7.6	7.6	7.6	1.52385	2.19155		34465	N/A	4.32	4.96	5.52	6.2	6.59	7.02	7.26	7.4	7.73	7.6	1994-05-11	1
1	1	1	1	1	7.57		7.57	7.57	7.57	7.57	7.57	7.57	7.57	7.57	7.57	7.57	7.57	1.54573	2.22079		34466	N/A	4.24	4.9	5.48	6.13	6.53	6.97	7.22	7.36	7.69	7.57	1994-05-12	1
1	1	1	1	1	7.5		7.5	7.5	7.5	7.5	7.5	7.5	7.5	7.5	7.5	7.5	7.5	1.53076	2.19398		34467	N/A	4.24	4.86	5.41	6.05	6.43	6.89	7.14	7.29	7.63	7.5	1994-05-13	1
1	1	1	1	1	7.46		7.46	7.46	7.46	7.46	7.46	7.46	7.46	7.46	7.46	7.46	7.46	1.49487	2.13907		34470	N/A	4.31	4.87	5.41	6.03	6.4	6.85	7.08	7.24	7.58	7.46	1994-05-16	1
1	1	1	1	1	7.27		7.27	7.27	7.27	7.27	7.27	7.27	7.27	7.27	7.27	7.27	7.27	1.43418	2.04565		34471	N/A	4.3	4.77	5.29	5.88	6.23	6.66	6.85	7.03	7.39	7.27	1994-05-17	1
1	1	1	1	1	7.27		7.27	7.27	7.27	7.27	7.27	7.27	7.27	7.27	7.27	7.27	7.27	1.46245	2.08083		34472	N/A	4.29	4.73	5.21	5.83	6.18	6.61	6.85	7.03	7.41	7.27	1994-05-18	1
1	1	1	1	1	7.24		7.24	7.24	7.24	7.24	7.24	7.24	7.24	7.24	7.24	7.24	7.24	1.49835	2.1205		34473	N/A	4.24	4.65	5.12	5.73	6.07	6.52	6.76	6.96	7.37	7.24	1994-05-19	1
1	1	1	1	1	7.3		7.3	7.3	7.3	7.3	7.3	7.3	7.3	7.3	7.3	7.3	7.3	1.50886	2.13847		34474	N/A	4.26	4.71	5.14	5.8	6.14	6.59	6.82	7.02	7.44	7.3	1994-05-20	1
1	1	1	1	1	7.44		7.44	7.44	7.44	7.44	7.44	7.44	7.44	7.44	7.44	7.44	7.44	1.51881	2.16		34477	N/A	4.35	4.82	5.28	5.94	6.3	6.76	6.99	7.19	7.58	7.44	1994-05-23	1
1	1	1	1	1	7.41		7.41	7.41	7.41	7.41	7.41	7.41	7.41	7.41	7.41	7.41	7.41	1.51056	2.1499		34478	N/A	4.32	4.79	5.28	5.94	6.28	6.75	6.96	7.17	7.54	7.41	1994-05-24	1
1	1	1	1	1	7.37		7.37	7.37	7.37	7.37	7.37	7.37	7.37	7.37	7.37	7.37	7.37	1.49336	2.13282		34479	N/A	4.28	4.76	5.28	5.95	6.31	6.74	6.93	7.14	7.51	7.37	1994-05-25	1
1	1	1	1	1	7.37		7.37	7.37	7.37	7.37	7.37	7.37	7.37	7.37	7.37	7.37	7.37	1.50406	2.13975		34480	N/A	4.27	4.76	5.28	5.92	6.27	6.69	6.9	7.09	7.51	7.37	1994-05-26	1
1	1	1	1	1	7.4		7.4	7.4	7.4	7.4	7.4	7.4	7.4	7.4	7.4	7.4	7.4	1.4912	2.12197		34481	N/A	4.3	4.82	5.35	5.97	6.32	6.73	6.92	7.12	7.55	7.4	1994-05-27	1
1	1	1	1	1	7.44		7.44	7.44	7.44	7.44	7.44	7.44	7.44	7.44	7.44	7.44	7.44	1.49547	2.13027		34485	N/A	4.31	4.87	5.38	6.01	6.36	6.77	6.99	7.17	7.58	7.44	1994-05-31	1
1	1	1	1	1	7.39		7.39	7.39	7.39	7.39	7.39	7.39	7.39	7.39	7.39	7.39	7.39	1.48214	2.11351		34486	N/A	4.28	4.83	5.36	5.98	6.33	6.74	6.95	7.12	7.52	7.39	1994-06-01	1
1	1	1	1	1	7.35		7.35	7.35	7.35	7.35	7.35	7.35	7.35	7.35	7.35	7.35	7.35	1.49373	2.12792		34487	N/A	4.24	4.76	5.29	5.93	6.28	6.68	6.89	7.07	7.49	7.35	1994-06-02	1
1	1	1	1	1	7.26		7.26	7.26	7.26	7.26	7.26	7.26	7.26	7.26	7.26	7.26	7.26	1.46877	2.08856		34488	N/A	4.23	4.72	5.22	5.84	6.19	6.59	6.78	6.98	7.39	7.26	1994-06-03	1
1	1	1	1	1	7.21		7.21	7.21	7.21	7.21	7.21	7.21	7.21	7.21	7.21	7.21	7.21	1.46219	2.06884		34491	N/A	4.25	4.69	5.15	5.78	6.1	6.49	6.7	6.91	7.34	7.21	1994-06-06	1
1	1	1	1	1	7.26		7.26	7.26	7.26	7.26	7.26	7.26	7.26	7.26	7.26	7.26	7.26	1.4953	2.11847		34492	N/A	4.22	4.68	5.16	5.8	6.14	6.53	6.75	6.95	7.37	7.26	1994-06-07	1
1	1	1	1	1	7.28		7.28	7.28	7.28	7.28	7.28	7.28	7.28	7.28	7.28	7.28	7.28	1.52222	2.15229		34493	N/A	4.21	4.66	5.13	5.78	6.11	6.53	6.75	6.96	7.39	7.28	1994-06-08	1
1	1	1	1	1	7.28		7.28	7.28	7.28	7.28	7.28	7.28	7.28	7.28	7.28	7.28	7.28	1.5101	2.13738		34494	N/A	4.23	4.67	5.15	5.8	6.13	6.54	6.76	6.98	7.39	7.28	1994-06-09	1
1	1	1	1	1	7.32		7.32	7.32	7.32	7.32	7.32	7.32	7.32	7.32	7.32	7.32	7.32	1.51715	2.1508		34495	N/A	4.22	4.7	5.2	5.85	6.17	6.6	6.82	7.03	7.44	7.32	1994-06-10	1
1	1	1	1	1	7.36		7.36	7.36	7.36	7.36	7.36	7.36	7.36	7.36	7.36	7.36	7.36	1.52406	2.16758		34498	N/A	4.24	4.7	5.22	5.91	6.25	6.66	6.87	7.07	7.47	7.36	1994-06-13	1
1	1	1	1	1	7.31		7.31	7.31	7.31	7.31	7.31	7.31	7.31	7.31	7.31	7.31	7.31	1.53602	2.17705		34499	N/A	4.21	4.64	5.14	5.81	6.15	6.58	6.79	7	7.41	7.31	1994-06-14	1
1	1	1	1	1	7.41		7.41	7.41	7.41	7.41	7.41	7.41	7.41	7.41	7.41	7.41	7.41	1.57467	2.23357		34500	N/A	4.23	4.66	5.19	5.88	6.23	6.67	6.88	7.1	7.53	7.41	1994-06-15	1
1	1	1	1	1	7.38		7.38	7.38	7.38	7.38	7.38	7.38	7.38	7.38	7.38	7.38	7.38	1.57238	2.23018		34501	N/A	4.22	4.64	5.15	5.83	6.19	6.65	6.86	7.07	7.49	7.38	1994-06-16	1
1	1	1	1	1	7.45		7.45	7.45	7.45	7.45	7.45	7.45	7.45	7.45	7.45	7.45	7.45	1.59758	2.26627		34502	N/A	4.23	4.66	5.2	5.88	6.24	6.71	6.93	7.14	7.58	7.45	1994-06-17	1
1	1	1	1	1	7.46		7.46	7.46	7.46	7.46	7.46	7.46	7.46	7.46	7.46	7.46	7.46	1.57048	2.23004		34505	N/A	4.28	4.73	5.24	5.92	6.28	6.74	6.96	7.16	7.58	7.46	1994-06-20	1
1	1	1	1	1	7.51		7.51	7.51	7.51	7.51	7.51	7.51	7.51	7.51	7.51	7.51	7.51	1.56458	2.22767		34506	N/A	4.3	4.77	5.31	6.04	6.37	6.82	7.02	7.22	7.63	7.51	1994-06-21	1
1	1	1	1	1	7.41		7.41	7.41	7.41	7.41	7.41	7.41	7.41	7.41	7.41	7.41	7.41	1.52077	2.16716		34507	N/A	4.28	4.75	5.28	5.97	6.31	6.75	6.94	7.13	7.52	7.41	1994-06-22	1
1	1	1	1	1	7.4		7.4	7.4	7.4	7.4	7.4	7.4	7.4	7.4	7.4	7.4	7.4	1.52734	2.16882		34508	N/A	4.26	4.74	5.29	5.94	6.26	6.7	6.9	7.1	7.51	7.4	1994-06-23	1
1	1	1	1	1	7.52		7.52	7.52	7.52	7.52	7.52	7.52	7.52	7.52	7.52	7.52	7.52	1.56339	2.22528		34509	N/A	4.28	4.78	5.37	6.06	6.38	6.81	7.05	7.22	7.63	7.52	1994-06-24	1
1	1	1	1	1	7.46		7.46	7.46	7.46	7.46	7.46	7.46	7.46	7.46	7.46	7.46	7.46	1.53393	2.1873		34512	N/A	4.28	4.73	5.37	6.05	6.36	6.79	7	7.18	7.57	7.46	1994-06-27	1
1	1	1	1	1	7.53		7.53	7.53	7.53	7.53	7.53	7.53	7.53	7.53	7.53	7.53	7.53	1.54631	2.21149		34513	N/A	4.28	4.75	5.48	6.13	6.46	6.88	7.09	7.26	7.65	7.53	1994-06-28	1
1	1	1	1	1	7.51		7.51	7.51	7.51	7.51	7.51	7.51	7.51	7.51	7.51	7.51	7.51	1.5433	2.20881		34514	N/A	4.25	4.74	5.47	6.12	6.45	6.87	7.08	7.24	7.63	7.51	1994-06-29	1
1	1	1	1	1	7.63		7.63	7.63	7.63	7.63	7.63	7.63	7.63	7.63	7.63	7.63	7.63	1.58784	2.27002		34515	N/A	4.26	4.83	5.51	6.19	6.52	6.97	7.18	7.34	7.75	7.63	1994-06-30	1
1	1	1	1	1	7.62		7.62	7.62	7.62	7.62	7.62	7.62	7.62	7.62	7.62	7.62	7.62	1.5688	2.24311		34516	N/A	4.32	4.84	5.5	6.19	6.53	6.95	7.19	7.34	7.74	7.62	1994-07-01	1
1	1	1	1	1	7.6		7.6	7.6	7.6	7.6	7.6	7.6	7.6	7.6	7.6	7.6	7.6	1.53461	2.18727		34520	N/A	4.42	4.92	5.48	6.14	6.48	6.93	7.17	7.31	7.71	7.6	1994-07-05	1
1	1	1	1	1	7.61		7.61	7.61	7.61	7.61	7.61	7.61	7.61	7.61	7.61	7.61	7.61	1.55363	2.21256		34521	N/A	4.39	4.92	5.46	6.11	6.47	6.92	7.16	7.32	7.72	7.61	1994-07-06	1
1	1	1	1	1	7.6		7.6	7.6	7.6	7.6	7.6	7.6	7.6	7.6	7.6	7.6	7.6	1.56097	2.21947		34522	N/A	4.36	4.9	5.45	6.11	6.44	6.89	7.13	7.3	7.71	7.6	1994-07-07	1
1	1	1	1	1	7.7		7.7	7.7	7.7	7.7	7.7	7.7	7.7	7.7	7.7	7.7	7.7	1.53504	2.18982		34523	N/A	4.49	5.04	5.58	6.25	6.59	7.04	7.27	7.42	7.81	7.7	1994-07-08	1
1	1	1	1	1	7.73		7.73	7.73	7.73	7.73	7.73	7.73	7.73	7.73	7.73	7.73	7.73	1.50388	2.14767		34526	N/A	4.61	5.13	5.61	6.29	6.65	7.09	7.33	7.47	7.84	7.73	1994-07-11	1
1	1	1	1	1	7.69		7.69	7.69	7.69	7.69	7.69	7.69	7.69	7.69	7.69	7.69	7.69	1.51296	2.15829		34527	N/A	4.56	5.08	5.55	6.24	6.6	7.03	7.26	7.43	7.8	7.69	1994-07-12	1
1	1	1	1	1	7.68		7.68	7.68	7.68	7.68	7.68	7.68	7.68	7.68	7.68	7.68	7.68	1.53124	2.18442		34528	N/A	4.52	5.02	5.52	6.22	6.58	7.02	7.23	7.41	7.79	7.68	1994-07-13	1
1	1	1	1	1	7.54		7.54	7.54	7.54	7.54	7.54	7.54	7.54	7.54	7.54	7.54	7.54	1.53182	2.17983		34529	N/A	4.41	4.88	5.38	6.05	6.42	6.85	7.06	7.25	7.63	7.54	1994-07-14	1
1	1	1	1	1	7.55		7.55	7.55	7.55	7.55	7.55	7.55	7.55	7.55	7.55	7.55	7.55	1.54936	2.2029		34530	N/A	4.38	4.87	5.37	6.04	6.41	6.84	7.06	7.25	7.64	7.55	1994-07-15	1
1	1	1	1	1	7.51		7.51	7.51	7.51	7.51	7.51	7.51	7.51	7.51	7.51	7.51	7.51	1.53384	2.17536		34533	N/A	4.4	4.87	5.34	5.99	6.35	6.79	7.01	7.2	7.6	7.51	1994-07-18	1
1	1	1	1	1	7.47		7.47	7.47	7.47	7.47	7.47	7.47	7.47	7.47	7.47	7.47	7.47	1.53821	2.17634		34534	N/A	4.37	4.82	5.3	5.94	6.28	6.73	6.95	7.15	7.56	7.47	1994-07-19	1
1	1	1	1	1	7.55		7.55	7.55	7.55	7.55	7.55	7.55	7.55	7.55	7.55	7.55	7.55	1.53483	2.17829		34535	N/A	4.41	4.9	5.4	6.06	6.39	6.84	7.06	7.25	7.64	7.55	1994-07-20	1
1	1	1	1	1	7.55		7.55	7.55	7.55	7.55	7.55	7.55	7.55	7.55	7.55	7.55	7.55	1.50178	2.13846		34536	N/A	4.44	4.92	5.5	6.11	6.45	6.89	7.09	7.27	7.64	7.55	1994-07-21	1
1	1	1	1	1	7.56		7.56	7.56	7.56	7.56	7.56	7.56	7.56	7.56	7.56	7.56	7.56	1.47955	2.10868		34537	N/A	4.5	4.96	5.53	6.15	6.49	6.92	7.1	7.29	7.65	7.56	1994-07-22	1
1	1	1	1	1	7.53		7.53	7.53	7.53	7.53	7.53	7.53	7.53	7.53	7.53	7.53	7.53	1.4475	2.06448		34540	N/A	4.53	5.01	5.53	6.13	6.49	6.9	7.1	7.27	7.61	7.53	1994-07-25	1
1	1	1	1	1	7.55		7.55	7.55	7.55	7.55	7.55	7.55	7.55	7.55	7.55	7.55	7.55	1.46107	2.08062		34541	N/A	4.52	5.01	5.53	6.16	6.49	6.9	7.09	7.28	7.63	7.55	1994-07-26	1
1	1	1	1	1	7.6		7.6	7.6	7.6	7.6	7.6	7.6	7.6	7.6	7.6	7.6	7.6	1.45645	2.0788		34542	N/A	4.57	5.07	5.57	6.22	6.55	6.99	7.18	7.34	7.69	7.6	1994-07-27	1
1	1	1	1	1	7.55		7.55	7.55	7.55	7.55	7.55	7.55	7.55	7.55	7.55	7.55	7.55	1.43898	2.05504		34543	N/A	4.54	5.04	5.56	6.21	6.53	6.94	7.13	7.29	7.62	7.55	1994-07-28	1
1	1	1	1	1	7.39		7.39	7.39	7.39	7.39	7.39	7.39	7.39	7.39	7.39	7.39	7.39	1.45379	2.06837		34544	N/A	4.39	4.87	5.37	5.99	6.33	6.73	6.92	7.12	7.46	7.39	1994-07-29	1
1	1	1	1	1	7.41		7.41	7.41	7.41	7.41	7.41	7.41	7.41	7.41	7.41	7.41	7.41	1.43712	2.04238		34547	N/A	4.45	4.93	5.4	6.03	6.35	6.75	6.94	7.13	7.47	7.41	1994-08-01	1
1	1	1	1	1	7.4		7.4	7.4	7.4	7.4	7.4	7.4	7.4	7.4	7.4	7.4	7.4	1.44832	2.05577		34548	N/A	4.44	4.92	5.35	5.98	6.32	6.73	6.91	7.11	7.46	7.4	1994-08-02	1
1	1	1	1	1	7.38		7.38	7.38	7.38	7.38	7.38	7.38	7.38	7.38	7.38	7.38	7.38	1.44383	2.04802		34549	N/A	4.44	4.9	5.34	5.96	6.29	6.7	6.91	7.09	7.44	7.38	1994-08-03	1
1	1	1	1	1	7.4		7.4	7.4	7.4	7.4	7.4	7.4	7.4	7.4	7.4	7.4	7.4	1.45238	2.0615		34550	N/A	4.43	4.9	5.36	5.98	6.31	6.72	6.93	7.12	7.47	7.4	1994-08-04	1
1	1	1	1	1	7.54		7.54	7.54	7.54	7.54	7.54	7.54	7.54	7.54	7.54	7.54	7.54	1.41162	2.01535		34551	N/A	4.59	5.1	5.59	6.18	6.55	6.93	7.11	7.28	7.62	7.54	1994-08-05	1
1	1	1	1	1	7.53		7.53	7.53	7.53	7.53	7.53	7.53	7.53	7.53	7.53	7.53	7.53	1.3945	1.99221		34554	N/A	4.59	5.13	5.6	6.22	6.56	6.93	7.11	7.28	7.61	7.53	1994-08-08	1
1	1	1	1	1	7.57		7.57	7.57	7.57	7.57	7.57	7.57	7.57	7.57	7.57	7.57	7.57	1.41467	2.02404		34555	N/A	4.56	5.14	5.62	6.26	6.61	6.97	7.14	7.33	7.65	7.57	1994-08-09	1
1	1	1	1	1	7.58		7.58	7.58	7.58	7.58	7.58	7.58	7.58	7.58	7.58	7.58	7.58	1.45449	2.07728		34556	N/A	4.49	5.1	5.58	6.21	6.57	6.95	7.14	7.3	7.66	7.58	1994-08-10	1
1	1	1	1	1	7.56		7.56	7.56	7.56	7.56	7.56	7.56	7.56	7.56	7.56	7.56	7.56	1.42839	2.05023		34557	N/A	4.46	5.12	5.62	6.26	6.61	7	7.18	7.36	7.72	7.56	1994-08-11	1
1	1	1	1	1	7.48		7.48	7.48	7.48	7.48	7.48	7.48	7.48	7.48	7.48	7.48	7.48	1.3795	1.98027		34558	N/A	4.51	5.1	5.6	6.22	6.57	6.94	7.12	7.27	7.66	7.48	1994-08-12	1
1	1	1	1	1	7.51		7.51	7.51	7.51	7.51	7.51	7.51	7.51	7.51	7.51	7.51	7.51	1.33496	1.90924		34561	N/A	4.72	5.19	5.64	6.26	6.58	6.96	7.14	7.3	7.68	7.51	1994-08-15	1
1	1	1	1	1	7.39		7.39	7.39	7.39	7.39	7.39	7.39	7.39	7.39	7.39	7.39	7.39	1.26921	1.81528		34562	N/A	4.74	5.17	5.62	6.21	6.52	6.86	7.02	7.19	7.56	7.39	1994-08-16	1
1	1	1	1	1	7.39		7.39	7.39	7.39	7.39	7.39	7.39	7.39	7.39	7.39	7.39	7.39	1.30951	1.86547		34563	N/A	4.69	5.11	5.56	6.14	6.45	6.81	6.99	7.15	7.55	7.39	1994-08-17	1
1	1	1	1	1	7.5		7.5	7.5	7.5	7.5	7.5	7.5	7.5	7.5	7.5	7.5	7.5	1.33696	1.90955		34564	N/A	4.71	5.15	5.68	6.23	6.56	6.93	7.12	7.28	7.67	7.5	1994-08-18	1
1	1	1	1	1	7.5		7.5	7.5	7.5	7.5	7.5	7.5	7.5	7.5	7.5	7.5	7.5	1.35063	1.92798		34565	N/A	4.69	5.13	5.64	6.23	6.55	6.92	7.1	7.27	7.67	7.5	1994-08-19	1
1	1	1	1	1	7.56		7.56	7.56	7.56	7.56	7.56	7.56	7.56	7.56	7.56	7.56	7.56	1.36688	1.94911		34568	N/A	4.73	5.17	5.66	6.27	6.59	6.97	7.14	7.31	7.73	7.56	1994-08-22	1
1	1	1	1	1	7.54		7.54	7.54	7.54	7.54	7.54	7.54	7.54	7.54	7.54	7.54	7.54	1.3761	1.96046		34569	N/A	4.69	5.13	5.63	6.26	6.55	6.94	7.12	7.28	7.71	7.54	1994-08-23	1
1	1	1	1	1	7.47		7.47	7.47	7.47	7.47	7.47	7.47	7.47	7.47	7.47	7.47	7.47	1.36407	1.94086		34570	N/A	4.66	5.09	5.57	6.18	6.47	6.87	7.04	7.22	7.63	7.47	1994-08-24	1
1	1	1	1	1	7.55		7.55	7.55	7.55	7.55	7.55	7.55	7.55	7.55	7.55	7.55	7.55	1.39965	1.9923		34571	N/A	4.68	5.09	5.59	6.24	6.53	6.93	7.12	7.29	7.71	7.55	1994-08-25	1
1	1	1	1	1	7.49		7.49	7.49	7.49	7.49	7.49	7.49	7.49	7.49	7.49	7.49	7.49	1.37206	1.95136		34572	N/A	4.68	5.07	5.58	6.21	6.48	6.87	7.07	7.24	7.65	7.49	1994-08-26	1
1	1	1	1	1	7.5		7.5	7.5	7.5	7.5	7.5	7.5	7.5	7.5	7.5	7.5	7.5	1.36337	1.93462		34575	N/A	4.73	5.12	5.58	6.2	6.48	6.87	7.05	7.24	7.66	7.5	1994-08-29	1
1	1	1	1	1	7.47		7.47	7.47	7.47	7.47	7.47	7.47	7.47	7.47	7.47	7.47	7.47	1.35891	1.92843		34576	N/A	4.71	5.09	5.56	6.18	6.46	6.83	7.03	7.2	7.62	7.47	1994-08-30	1
1	1	1	1	1	7.46		7.46	7.46	7.46	7.46	7.46	7.46	7.46	7.46	7.46	7.46	7.46	1.37095	1.9446		34577	N/A	4.68	5.03	5.56	6.17	6.44	6.81	7	7.19	7.6	7.46	1994-08-31	1
1	1	1	1	1	7.46		7.46	7.46	7.46	7.46	7.46	7.46	7.46	7.46	7.46	7.46	7.46	1.38068	1.96016		34578	N/A	4.67	4.99	5.56	6.15	6.44	6.81	7.01	7.19	7.6	7.46	1994-09-01	1
1	1	1	1	1	7.5		7.5	7.5	7.5	7.5	7.5	7.5	7.5	7.5	7.5	7.5	7.5	1.39937	1.98151		34579	N/A	4.67	5.04	5.55	6.17	6.45	6.82	7.01	7.21	7.64	7.5	1994-09-02	1
1	1	1	1	1	7.55		7.55	7.55	7.55	7.55	7.55	7.55	7.55	7.55	7.55	7.55	7.55	1.41118	2.00147		34583	N/A	4.69	5.06	5.58	6.22	6.5	6.88	7.08	7.27	7.71	7.55	1994-09-06	1
1	1	1	1	1	7.58		7.58	7.58	7.58	7.58	7.58	7.58	7.58	7.58	7.58	7.58	7.58	1.43354	2.03457		34584	N/A	4.66	5.05	5.6	6.22	6.51	6.92	7.11	7.29	7.73	7.58	1994-09-07	1
1	1	1	1	1	7.58		7.58	7.58	7.58	7.58	7.58	7.58	7.58	7.58	7.58	7.58	7.58	1.43146	2.03117		34585	N/A	4.67	5.06	5.59	6.22	6.51	6.92	7.1	7.3	7.73	7.58	1994-09-08	1
1	1	1	1	1	7.71		7.71	7.71	7.71	7.71	7.71	7.71	7.71	7.71	7.71	7.71	7.71	1.45802	2.07628		34586	N/A	4.7	5.14	5.7	6.35	6.66	7.06	7.26	7.44	7.88	7.71	1994-09-09	1
1	1	1	1	1	7.72		7.72	7.72	7.72	7.72	7.72	7.72	7.72	7.72	7.72	7.72	7.72	1.44144	2.05155		34589	N/A	4.75	5.19	5.72	6.37	6.67	7.08	7.27	7.46	7.89	7.72	1994-09-12	1
1	1	1	1	1	7.7		7.7	7.7	7.7	7.7	7.7	7.7	7.7	7.7	7.7	7.7	7.7	1.44345	2.05445		34590	N/A	4.72	5.17	5.7	6.35	6.65	7.05	7.26	7.44	7.87	7.7	1994-09-13	1
1	1	1	1	1	7.68		7.68	7.68	7.68	7.68	7.68	7.68	7.68	7.68	7.68	7.68	7.68	1.4441	2.05445		34591	N/A	4.7	5.15	5.68	6.33	6.63	7.02	7.23	7.41	7.83	7.68	1994-09-14	1
1	1	1	1	1	7.64		7.64	7.64	7.64	7.64	7.64	7.64	7.64	7.64	7.64	7.64	7.64	1.42798	2.0271		34592	N/A	4.7	5.14	5.69	6.28	6.58	6.97	7.19	7.35	7.8	7.64	1994-09-15	1
1	1	1	1	1	7.78		7.78	7.78	7.78	7.78	7.78	7.78	7.78	7.78	7.78	7.78	7.78	1.4601	2.07917		34593	N/A	4.73	5.23	5.79	6.42	6.72	7.13	7.34	7.52	7.95	7.78	1994-09-16	1
1	1	1	1	1	7.75		7.75	7.75	7.75	7.75	7.75	7.75	7.75	7.75	7.75	7.75	7.75	1.44688	2.06213		34596	N/A	4.72	5.23	5.78	6.39	6.71	7.11	7.32	7.49	7.9	7.75	1994-09-19	1
1	1	1	1	1	7.78		7.78	7.78	7.78	7.78	7.78	7.78	7.78	7.78	7.78	7.78	7.78	1.43937	2.05324		34597	N/A	4.74	5.29	5.82	6.44	6.75	7.15	7.37	7.53	7.93	7.78	1994-09-20	1
1	1	1	1	1	7.8		7.8	7.8	7.8	7.8	7.8	7.8	7.8	7.8	7.8	7.8	7.8	1.37784	1.96483		34598	N/A	4.92	5.4	5.9	6.52	6.81	7.2	7.4	7.56	7.95	7.8	1994-09-21	1
1	1	1	1	1	7.79		7.79	7.79	7.79	7.79	7.79	7.79	7.79	7.79	7.79	7.79	7.79	1.37592	1.96271		34599	N/A	4.92	5.4	5.88	6.5	6.8	7.2	7.39	7.56	7.94	7.79	1994-09-22	1
1	1	1	1	1	7.8		7.8	7.8	7.8	7.8	7.8	7.8	7.8	7.8	7.8	7.8	7.8	1.3764	1.96484		34600	N/A	4.91	5.42	5.89	6.52	6.83	7.2	7.4	7.57	7.95	7.8	1994-09-23	1
1	1	1	1	1	7.8		7.8	7.8	7.8	7.8	7.8	7.8	7.8	7.8	7.8	7.8	7.8	1.36649	1.95057		34603	N/A	4.92	5.44	5.91	6.54	6.83	7.21	7.41	7.57	7.95	7.8	1994-09-26	1
1	1	1	1	1	7.85		7.85	7.85	7.85	7.85	7.85	7.85	7.85	7.85	7.85	7.85	7.85	1.42692	2.03634		34604	N/A	4.83	5.4	5.89	6.52	6.83	7.24	7.44	7.61	8.01	7.85	1994-09-27	1
1	1	1	1	1	7.81		7.81	7.81	7.81	7.81	7.81	7.81	7.81	7.81	7.81	7.81	7.81	1.44117	2.06354		34605	N/A	4.66	5.37	5.88	6.51	6.83	7.21	7.42	7.57	7.97	7.81	1994-09-28	1
1	1	1	1	1	7.86		7.86	7.86	7.86	7.86	7.86	7.86	7.86	7.86	7.86	7.86	7.86	1.43034	2.05318		34606	N/A	4.7	5.44	5.95	6.6	6.92	7.29	7.48	7.64	8.02	7.86	1994-09-29	1
1	1	1	1	1	7.82		7.82	7.82	7.82	7.82	7.82	7.82	7.82	7.82	7.82	7.82	7.82	1.38265	1.98656		34607	N/A	4.8	5.43	5.96	6.62	6.92	7.28	7.46	7.62	7.98	7.82	1994-09-30	1
1	1	1	1	1	7.86		7.86	7.86	7.86	7.86	7.86	7.86	7.86	7.86	7.86	7.86	7.86	1.30493	1.87443		34610	N/A	5.05	5.61	6.06	6.69	7.01	7.35	7.52	7.66	8.02	7.86	1994-10-03	1
1	1	1	1	1	7.89		7.89	7.89	7.89	7.89	7.89	7.89	7.89	7.89	7.89	7.89	7.89	1.31849	1.89194		34611	N/A	5.09	5.6	6.06	6.68	7.01	7.37	7.55	7.7	8.06	7.89	1994-10-04	1
1	1	1	1	1	7.95		7.95	7.95	7.95	7.95	7.95	7.95	7.95	7.95	7.95	7.95	7.95	1.34279	1.92697		34612	N/A	5.09	5.61	6.1	6.73	7.05	7.42	7.61	7.77	8.12	7.95	1994-10-05	1
1	1	1	1	1	7.95		7.95	7.95	7.95	7.95	7.95	7.95	7.95	7.95	7.95	7.95	7.95	1.3377	1.92118		34613	N/A	5.11	5.62	6.1	6.71	7.06	7.43	7.62	7.78	8.12	7.95	1994-10-06	1
1	1	1	1	1	7.91		7.91	7.91	7.91	7.91	7.91	7.91	7.91	7.91	7.91	7.91	7.91	1.3663	1.95547		34614	N/A	5.02	5.55	6.01	6.65	6.97	7.34	7.54	7.7	8.07	7.91	1994-10-07	1
1	1	1	1	1	7.86		7.86	7.86	7.86	7.86	7.86	7.86	7.86	7.86	7.86	7.86	7.86	1.32875	1.90081		34618	N/A	5.06	5.56	6.01	6.63	6.95	7.3	7.48	7.65	8.02	7.86	1994-10-11	1
1	1	1	1	1	7.89		7.89	7.89	7.89	7.89	7.89	7.89	7.89	7.89	7.89	7.89	7.89	1.32257	1.89364		34619	N/A	5.12	5.57	6.05	6.67	6.99	7.34	7.52	7.69	8.04	7.89	1994-10-12	1
1	1	1	1	1	7.84		7.84	7.84	7.84	7.84	7.84	7.84	7.84	7.84	7.84	7.84	7.84	1.31822	1.8898		34620	N/A	5.05	5.5	6.07	6.63	6.96	7.3	7.48	7.64	7.99	7.84	1994-10-13	1
1	1	1	1	1	7.83		7.83	7.83	7.83	7.83	7.83	7.83	7.83	7.83	7.83	7.83	7.83	1.34225	1.91997		34621	N/A	5	5.48	6.01	6.57	6.91	7.26	7.45	7.61	7.98	7.83	1994-10-14	1
1	1	1	1	1	7.83		7.83	7.83	7.83	7.83	7.83	7.83	7.83	7.83	7.83	7.83	7.83	1.31422	1.88016		34624	N/A	5.04	5.55	6.04	6.61	6.92	7.28	7.47	7.62	7.97	7.83	1994-10-17	1
1	1	1	1	1	7.86		7.86	7.86	7.86	7.86	7.86	7.86	7.86	7.86	7.86	7.86	7.86	1.33467	1.90596		34625	N/A	5.04	5.55	6.04	6.61	6.92	7.29	7.47	7.64	8.01	7.86	1994-10-18	1
1	1	1	1	1	7.9		7.9	7.9	7.9	7.9	7.9	7.9	7.9	7.9	7.9	7.9	7.9	1.33979	1.91788		34626	N/A	5.05	5.58	6.07	6.66	6.99	7.34	7.52	7.68	8.04	7.9	1994-10-19	1
1	1	1	1	1	8		8	8	8	8	8	8	8	8	8	8	8	1.33933	1.92009		34627	N/A	5.14	5.67	6.18	6.77	7.1	7.46	7.63	7.8	8.14	8	1994-10-20	1
1	1	1	1	1	7.99		7.99	7.99	7.99	7.99	7.99	7.99	7.99	7.99	7.99	7.99	7.99	1.32432	1.90041		34628	N/A	5.15	5.68	6.19	6.8	7.11	7.46	7.63	7.81	8.12	7.99	1994-10-21	1
1	1	1	1	1	8.04		8.04	8.04	8.04	8.04	8.04	8.04	8.04	8.04	8.04	8.04	8.04	1.3187	1.89327		34631	N/A	5.22	5.74	6.24	6.84	7.17	7.52	7.68	7.86	8.17	8.04	1994-10-24	1
1	1	1	1	1	8.06		8.06	8.06	8.06	8.06	8.06	8.06	8.06	8.06	8.06	8.06	8.06	1.32854	1.90829		34632	N/A	5.2	5.75	6.25	6.87	7.18	7.54	7.72	7.88	8.18	8.06	1994-10-25	1
1	1	1	1	1	8.06		8.06	8.06	8.06	8.06	8.06	8.06	8.06	8.06	8.06	8.06	8.06	1.34904	1.93917		34633	N/A	5.13	5.71	6.23	6.9	7.17	7.55	7.72	7.88	8.19	8.06	1994-10-26	1
1	1	1	1	1	8.05		8.05	8.05	8.05	8.05	8.05	8.05	8.05	8.05	8.05	8.05	8.05	1.34704	1.93729		34634	N/A	5.12	5.7	6.23	6.89	7.16	7.55	7.72	7.88	8.17	8.05	1994-10-27	1
1	1	1	1	1	7.96		7.96	7.96	7.96	7.96	7.96	7.96	7.96	7.96	7.96	7.96	7.96	1.30351	1.87552		34635	N/A	5.16	5.67	6.17	6.82	7.1	7.48	7.65	7.82	8.09	7.96	1994-10-28	1
1	1	1	1	1	7.97		7.97	7.97	7.97	7.97	7.97	7.97	7.97	7.97	7.97	7.97	7.97	1.29179	1.85561		34638	N/A	5.2	5.72	6.18	6.84	7.1	7.48	7.65	7.81	8.09	7.97	1994-10-31	1
1	1	1	1	1	8.06		8.06	8.06	8.06	8.06	8.06	8.06	8.06	8.06	8.06	8.06	8.06	1.31584	1.89498		34639	N/A	5.22	5.75	6.25	6.93	7.21	7.58	7.75	7.91	8.2	8.06	1994-11-01	1
1	1	1	1	1	8.09		8.09	8.09	8.09	8.09	8.09	8.09	8.09	8.09	8.09	8.09	8.09	1.32124	1.90586		34640	N/A	5.23	5.76	6.28	6.96	7.25	7.63	7.79	7.96	8.22	8.09	1994-11-02	1
1	1	1	1	1	8.11		8.11	8.11	8.11	8.11	8.11	8.11	8.11	8.11	8.11	8.11	8.11	1.32144	1.90642		34641	N/A	5.25	5.77	6.31	6.98	7.28	7.65	7.8	7.96	8.24	8.11	1994-11-03	1
1	1	1	1	1	8.16		8.16	8.16	8.16	8.16	8.16	8.16	8.16	8.16	8.16	8.16	8.16	1.29853	1.87713		34642	N/A	5.33	5.87	6.39	7.05	7.37	7.72	7.88	8.04	8.3	8.16	1994-11-04	1
1	1	1	1	1	8.16		8.16	8.16	8.16	8.16	8.16	8.16	8.16	8.16	8.16	8.16	8.16	1.26493	1.82856		34645	N/A	5.42	5.93	6.42	7.06	7.39	7.73	7.89	8.05	8.3	8.16	1994-11-07	1
1	1	1	1	1	8.12		8.12	8.12	8.12	8.12	8.12	8.12	8.12	8.12	8.12	8.12	8.12	1.26331	1.82966		34646	N/A	5.37	5.89	6.39	7.02	7.39	7.69	7.85	8.01	8.24	8.12	1994-11-08	1
1	1	1	1	1	8.09		8.09	8.09	8.09	8.09	8.09	8.09	8.09	8.09	8.09	8.09	8.09	1.26265	1.82539		34647	N/A	5.34	5.86	6.37	7.01	7.35	7.64	7.79	7.94	8.21	8.09	1994-11-09	1
1	1	1	1	1	8.15		8.15	8.15	8.15	8.15	8.15	8.15	8.15	8.15	8.15	8.15	8.15	1.2667	1.82956		34648	N/A	5.38	5.88	6.5	7.06	7.4	7.69	7.84	7.98	8.27	8.15	1994-11-10	1
1	1	1	1	1	8.09		8.09	8.09	8.09	8.09	8.09	8.09	8.09	8.09	8.09	8.09	8.09	1.20054	1.73391		34652	N/A	5.46	5.97	6.49	7.06	7.37	7.66	7.8	7.94	8.2	8.09	1994-11-14	1
1	1	1	1	1	8.05		8.05	8.05	8.05	8.05	8.05	8.05	8.05	8.05	8.05	8.05	8.05	1.13707	1.64823		34653	N/A	5.53	6.03	6.55	7.1	7.41	7.69	7.78	7.92	8.15	8.05	1994-11-15	1
1	1	1	1	1	8.09		8.09	8.09	8.09	8.09	8.09	8.09	8.09	8.09	8.09	8.09	8.09	1.15067	1.66979		34654	N/A	5.52	6.04	6.59	7.15	7.45	7.73	7.86	7.97	8.22	8.09	1994-11-16	1
1	1	1	1	1	8.14		8.14	8.14	8.14	8.14	8.14	8.14	8.14	8.14	8.14	8.14	8.14	1.16984	1.70061		34655	N/A	5.51	6.05	6.62	7.21	7.52	7.79	7.9	8.03	8.27	8.14	1994-11-17	1
1	1	1	1	1	8.14		8.14	8.14	8.14	8.14	8.14	8.14	8.14	8.14	8.14	8.14	8.14	1.16965	1.70045		34656	N/A	5.5	6.04	6.64	7.23	7.52	7.79	7.91	8.01	8.26	8.14	1994-11-18	1
1	1	1	1	1	8.14		8.14	8.14	8.14	8.14	8.14	8.14	8.14	8.14	8.14	8.14	8.14	1.14208	1.66444		34659	N/A	5.53	6.09	6.68	7.3	7.57	7.83	7.92	8.03	8.26	8.14	1994-11-21	1
1	1	1	1	1	8.11		8.11	8.11	8.11	8.11	8.11	8.11	8.11	8.11	8.11	8.11	8.11	1.13572	1.65718		34660	N/A	5.49	6.08	6.67	7.29	7.56	7.82	7.9	8	8.23	8.11	1994-11-22	1
1	1	1	1	1	7.96		7.96	7.96	7.96	7.96	7.96	7.96	7.96	7.96	7.96	7.96	7.96	1.09916	1.60071		34661	N/A	5.44	5.98	6.57	7.18	7.43	7.64	7.71	7.81	8.06	7.96	1994-11-23	1
1	1	1	1	1	7.94		7.94	7.94	7.94	7.94	7.94	7.94	7.94	7.94	7.94	7.94	7.94	1.08004	1.57573		34663	N/A	5.45	5.99	6.58	7.19	7.44	7.65	7.71	7.8	8.04	7.94	1994-11-25	1
1	1	1	1	1	7.99		7.99	7.99	7.99	7.99	7.99	7.99	7.99	7.99	7.99	7.99	7.99	1.02024	1.4954		34666	N/A	5.6	6.12	6.74	7.35	7.59	7.77	7.8	7.88	8.1	7.99	1994-11-28	1
1	1	1	1	1	8.05		8.05	8.05	8.05	8.05	8.05	8.05	8.05	8.05	8.05	8.05	8.05	1.00456	1.47503		34667	N/A	5.69	6.18	6.85	7.44	7.68	7.86	7.88	7.95	8.15	8.05	1994-11-29	1
1	1	1	1	1	7.99		7.99	7.99	7.99	7.99	7.99	7.99	7.99	7.99	7.99	7.99	7.99	0.95433	1.40002		34668	N/A	5.72	6.22	6.91	7.4	7.62	7.79	7.84	7.91	8.1	7.99	1994-11-30	1
1	1	1	1	1	8.02		8.02	8.02	8.02	8.02	8.02	8.02	8.02	8.02	8.02	8.02	8.02	0.963096	1.41139		34669	N/A	5.71	6.26	6.94	7.42	7.63	7.8	7.87	7.92	8.12	8.02	1994-12-01	1
1	1	1	1	1	7.92		7.92	7.92	7.92	7.92	7.92	7.92	7.92	7.92	7.92	7.92	7.92	0.85981	1.25987		34670	N/A	5.79	6.39	7.01	7.44	7.59	7.71	7.77	7.81	8.01	7.92	1994-12-02	1
1	1	1	1	1	7.94		7.94	7.94	7.94	7.94	7.94	7.94	7.94	7.94	7.94	7.94	7.94	0.754267	1.10616		34673	N/A	6.03	6.63	7.15	7.58	7.67	7.78	7.8	7.83	8.04	7.94	1994-12-05	1
1	1	1	1	1	7.84		7.84	7.84	7.84	7.84	7.84	7.84	7.84	7.84	7.84	7.84	7.84	0.762967	1.11844		34674	N/A	5.94	6.5	7.01	7.44	7.57	7.65	7.7	7.73	7.93	7.84	1994-12-06	1
1	1	1	1	1	7.9		7.9	7.9	7.9	7.9	7.9	7.9	7.9	7.9	7.9	7.9	7.9	0.829299	1.21873		34675	N/A	5.82	6.44	7.01	7.48	7.62	7.74	7.78	7.81	8.01	7.9	1994-12-07	1
1	1	1	1	1	7.88		7.88	7.88	7.88	7.88	7.88	7.88	7.88	7.88	7.88	7.88	7.88	0.793158	1.1689		34676	N/A	5.83	6.47	7.17	7.51	7.67	7.77	7.77	7.79	7.99	7.88	1994-12-08	1
1	1	1	1	1	7.86		7.86	7.86	7.86	7.86	7.86	7.86	7.86	7.86	7.86	7.86	7.86	0.786835	1.16057		34677	N/A	5.82	6.46	7.15	7.53	7.67	7.74	7.77	7.79	7.97	7.86	1994-12-09	1
1	1	1	1	1	7.92		7.92	7.92	7.92	7.92	7.92	7.92	7.92	7.92	7.92	7.92	7.92	0.754423	1.11378		34680	N/A	5.93	6.62	7.24	7.62	7.77	7.82	7.84	7.85	8.04	7.92	1994-12-12	1
1	1	1	1	1	7.86		7.86	7.86	7.86	7.86	7.86	7.86	7.86	7.86	7.86	7.86	7.86	0.70037	1.03714		34681	N/A	5.95	6.67	7.32	7.71	7.8	7.84	7.84	7.83	7.97	7.86	1994-12-13	1
1	1	1	1	1	7.86		7.86	7.86	7.86	7.86	7.86	7.86	7.86	7.86	7.86	7.86	7.86	0.758252	1.1183		34682	N/A	5.84	6.57	7.2	7.59	7.69	7.74	7.79	7.8	8	7.86	1994-12-14	1
1	1	1	1	1	7.86		7.86	7.86	7.86	7.86	7.86	7.86	7.86	7.86	7.86	7.86	7.86	0.817363	1.20543		34683	N/A	5.7	6.48	7.09	7.54	7.66	7.73	7.79	7.79	7.99	7.86	1994-12-15	1
1	1	1	1	1	7.86		7.86	7.86	7.86	7.86	7.86	7.86	7.86	7.86	7.86	7.86	7.86	0.801272	1.18401		34684	N/A	5.71	6.52	7.14	7.59	7.71	7.76	7.8	7.81	7.98	7.86	1994-12-16	1
1	1	1	1	1	7.84		7.84	7.84	7.84	7.84	7.84	7.84	7.84	7.84	7.84	7.84	7.84	0.773645	1.14434		34687	N/A	5.75	6.57	7.13	7.59	7.72	7.77	7.8	7.81	7.96	7.84	1994-12-19	1
1	1	1	1	1	7.85		7.85	7.85	7.85	7.85	7.85	7.85	7.85	7.85	7.85	7.85	7.85	0.831155	1.22809		34688	N/A	5.63	6.47	7.06	7.56	7.68	7.76	7.8	7.81	7.98	7.85	1994-12-20	1
1	1	1	1	1	7.84		7.84	7.84	7.84	7.84	7.84	7.84	7.84	7.84	7.84	7.84	7.84	0.849888	1.25651		34689	N/A	5.56	6.43	7.04	7.58	7.68	7.75	7.8	7.8	7.96	7.84	1994-12-21	1
1	1	1	1	1	7.87		7.87	7.87	7.87	7.87	7.87	7.87	7.87	7.87	7.87	7.87	7.87	0.827125	1.22502		34690	N/A	5.61	6.5	7.17	7.7	7.81	7.83	7.83	7.84	7.99	7.87	1994-12-22	1
1	1	1	1	1	7.85		7.85	7.85	7.85	7.85	7.85	7.85	7.85	7.85	7.85	7.85	7.85	0.796538	1.18034		34691	N/A	5.68	6.5	7.2	7.74	7.82	7.86	7.86	7.85	7.96	7.85	1994-12-23	1
1	1	1	1	1	7.76		7.76	7.76	7.76	7.76	7.76	7.76	7.76	7.76	7.76	7.76	7.76	0.733974	1.0875		34695	N/A	5.74	6.54	7.18	7.67	7.76	7.78	7.77	7.76	7.87	7.76	1994-12-27	1
1	1	1	1	1	7.83		7.83	7.83	7.83	7.83	7.83	7.83	7.83	7.83	7.83	7.83	7.83	0.775095	1.14771		34696	N/A	5.68	6.56	7.25	7.71	7.78	7.81	7.79	7.8	7.96	7.83	1994-12-28	1
1	1	1	1	1	7.85		7.85	7.85	7.85	7.85	7.85	7.85	7.85	7.85	7.85	7.85	7.85	0.801368	1.18657		34697	N/A	5.66	6.51	7.2	7.69	7.8	7.83	7.82	7.82	7.99	7.85	1994-12-29	1
1	1	1	1	1	7.89		7.89	7.89	7.89	7.89	7.89	7.89	7.89	7.89	7.89	7.89	7.89	0.816767	1.20869		34698	N/A	5.68	6.51	7.2	7.69	7.8	7.83	7.84	7.84	8.02	7.89	1994-12-30	1
1	1	1	1	1	7.93		7.93	7.93	7.93	7.93	7.93	7.93	7.93	7.93	7.93	7.93	7.93	0.744458	1.10121		34702	N/A	5.95	6.66	7.23	7.73	7.84	7.88	7.91	7.88	8.07	7.93	1995-01-03	1
1	1	1	1	1	7.85		7.85	7.85	7.85	7.85	7.85	7.85	7.85	7.85	7.85	7.85	7.85	0.751459	1.11187		34703	N/A	5.85	6.57	7.15	7.62	7.75	7.81	7.82	7.82	7.98	7.85	1995-01-04	1
1	1	1	1	1	7.91		7.91	7.91	7.91	7.91	7.91	7.91	7.91	7.91	7.91	7.91	7.91	0.753489	1.11548		34704	N/A	5.88	6.61	7.32	7.66	7.83	7.87	7.89	7.88	8.03	7.91	1995-01-05	1
1	1	1	1	1	7.87		7.87	7.87	7.87	7.87	7.87	7.87	7.87	7.87	7.87	7.87	7.87	0.733262	1.08568		34705	N/A	5.9	6.61	7.26	7.64	7.81	7.87	7.89	7.87	8	7.87	1995-01-06	1
1	1	1	1	1	7.9		7.9	7.9	7.9	7.9	7.9	7.9	7.9	7.9	7.9	7.9	7.9	0.712818	1.05529		34708	N/A	6	6.67	7.27	7.68	7.84	7.9	7.92	7.89	8.03	7.9	1995-01-09	1
1	1	1	1	1	7.87		7.87	7.87	7.87	7.87	7.87	7.87	7.87	7.87	7.87	7.87	7.87	0.733832	1.08603		34709	N/A	5.91	6.62	7.21	7.63	7.78	7.85	7.87	7.84	8	7.87	1995-01-10	1
1	1	1	1	1	7.85		7.85	7.85	7.85	7.85	7.85	7.85	7.85	7.85	7.85	7.85	7.85	0.778623	1.15156		34710	N/A	5.79	6.51	7.13	7.58	7.73	7.8	7.82	7.79	7.98	7.85	1995-01-11	1
1	1	1	1	1	7.88		7.88	7.88	7.88	7.88	7.88	7.88	7.88	7.88	7.88	7.88	7.88	0.807291	1.19268		34711	N/A	5.78	6.48	7.08	7.56	7.73	7.8	7.84	7.8	8.02	7.88	1995-01-12	1
1	1	1	1	1	7.8		7.8	7.8	7.8	7.8	7.8	7.8	7.8	7.8	7.8	7.8	7.8	0.82375	1.21153		34712	N/A	5.72	6.38	6.89	7.39	7.55	7.64	7.71	7.69	7.93	7.8	1995-01-13	1
1	1	1	1	1	7.78		7.78	7.78	7.78	7.78	7.78	7.78	7.78	7.78	7.78	7.78	7.78	0.749509	1.10521		34716	N/A	5.89	6.44	6.99	7.44	7.6	7.68	7.72	7.7	7.92	7.78	1995-01-17	1
1	1	1	1	1	7.78		7.78	7.78	7.78	7.78	7.78	7.78	7.78	7.78	7.78	7.78	7.78	0.744245	1.09936		34717	N/A	5.87	6.46	7.03	7.48	7.64	7.71	7.72	7.71	7.91	7.78	1995-01-18	1
1	1	1	1	1	7.82		7.82	7.82	7.82	7.82	7.82	7.82	7.82	7.82	7.82	7.82	7.82	0.763973	1.12765		34718	N/A	5.87	6.47	7.03	7.49	7.65	7.74	7.76	7.74	7.95	7.82	1995-01-19	1
1	1	1	1	1	7.9		7.9	7.9	7.9	7.9	7.9	7.9	7.9	7.9	7.9	7.9	7.9	0.791667	1.16788		34719	N/A	5.91	6.5	7.04	7.5	7.7	7.8	7.84	7.82	8.02	7.9	1995-01-20	1
1	1	1	1	1	7.91		7.91	7.91	7.91	7.91	7.91	7.91	7.91	7.91	7.91	7.91	7.91	0.784237	1.15618		34722	N/A	5.97	6.51	7.02	7.5	7.69	7.8	7.86	7.83	8.02	7.91	1995-01-23	1
1	1	1	1	1	7.93		7.93	7.93	7.93	7.93	7.93	7.93	7.93	7.93	7.93	7.93	7.93	0.78437	1.15622		34723	N/A	5.98	6.53	7.04	7.57	7.71	7.82	7.87	7.86	8.05	7.93	1995-01-24	1
1	1	1	1	1	7.88		7.88	7.88	7.88	7.88	7.88	7.88	7.88	7.88	7.88	7.88	7.88	0.790943	1.16368		34724	N/A	5.94	6.46	6.96	7.5	7.61	7.76	7.81	7.8	7.99	7.88	1995-01-25	1
1	1	1	1	1	7.85		7.85	7.85	7.85	7.85	7.85	7.85	7.85	7.85	7.85	7.85	7.85	0.791833	1.16192		34725	N/A	5.94	6.44	6.9	7.39	7.54	7.7	7.75	7.76	7.95	7.85	1995-01-26	1
1	1	1	1	1	7.75		7.75	7.75	7.75	7.75	7.75	7.75	7.75	7.75	7.75	7.75	7.75	0.760173	1.11544		34726	N/A	5.92	6.41	6.82	7.29	7.46	7.6	7.63	7.66	7.83	7.75	1995-01-27	1
1	1	1	1	1	7.76		7.76	7.76	7.76	7.76	7.76	7.76	7.76	7.76	7.76	7.76	7.76	0.770761	1.12422		34729	N/A	5.96	6.39	6.8	7.23	7.4	7.55	7.62	7.65	7.86	7.76	1995-01-30	1
1	1	1	1	1	7.71		7.71	7.71	7.71	7.71	7.71	7.71	7.71	7.71	7.71	7.71	7.71	0.724249	1.05826		34730	N/A	6	6.4	6.84	7.26	7.39	7.54	7.58	7.6	7.81	7.71	1995-01-31	1
1	1	1	1	1	7.75		7.75	7.75	7.75	7.75	7.75	7.75	7.75	7.75	7.75	7.75	7.75	0.69773	1.01929		34731	N/A	6.07	6.49	6.97	7.33	7.44	7.56	7.65	7.66	7.85	7.75	1995-02-01	1
1	1	1	1	1	7.76		7.76	7.76	7.76	7.76	7.76	7.76	7.76	7.76	7.76	7.76	7.76	0.705575	1.03767		34732	N/A	6.02	6.47	7.01	7.4	7.53	7.63	7.67	7.68	7.85	7.76	1995-02-02	1
1	1	1	1	1	7.61		7.61	7.61	7.61	7.61	7.61	7.61	7.61	7.61	7.61	7.61	7.61	0.704111	1.02586		34733	N/A	5.96	6.34	6.77	7.14	7.3	7.4	7.44	7.49	7.7	7.61	1995-02-03	1
1	1	1	1	1	7.64		7.64	7.64	7.64	7.64	7.64	7.64	7.64	7.64	7.64	7.64	7.64	0.706933	1.03229		34736	N/A	5.98	6.36	6.79	7.18	7.35	7.43	7.49	7.53	7.72	7.64	1995-02-06	1
1	1	1	1	1	7.65		7.65	7.65	7.65	7.65	7.65	7.65	7.65	7.65	7.65	7.65	7.65	0.713417	1.0413		34737	N/A	5.98	6.36	6.78	7.19	7.36	7.44	7.49	7.52	7.73	7.65	1995-02-07	1
1	1	1	1	1	7.66		7.66	7.66	7.66	7.66	7.66	7.66	7.66	7.66	7.66	7.66	7.66	0.73906	1.07741		34738	N/A	5.94	6.33	6.74	7.18	7.34	7.43	7.5	7.53	7.74	7.66	1995-02-08	1
1	1	1	1	1	7.65		7.65	7.65	7.65	7.65	7.65	7.65	7.65	7.65	7.65	7.65	7.65	0.711905	1.04595		34739	N/A	5.95	6.36	6.79	7.23	7.43	7.5	7.54	7.58	7.78	7.65	1995-02-09	1
1	1	1	1	1	7.68		7.68	7.68	7.68	7.68	7.68	7.68	7.68	7.68	7.68	7.68	7.68	0.70455	1.03672		34740	N/A	5.97	6.4	6.85	7.33	7.47	7.55	7.61	7.62	7.81	7.68	1995-02-10	1
1	1	1	1	1	7.67		7.67	7.67	7.67	7.67	7.67	7.67	7.67	7.67	7.67	7.67	7.67	0.697698	1.02605		34743	N/A	5.98	6.4	6.85	7.32	7.45	7.54	7.6	7.61	7.8	7.67	1995-02-13	1
1	1	1	1	1	7.61		7.61	7.61	7.61	7.61	7.61	7.61	7.61	7.61	7.61	7.61	7.61	0.693529	1.01495		34744	N/A	5.96	6.36	6.77	7.21	7.34	7.45	7.5	7.51	7.75	7.61	1995-02-14	1
1	1	1	1	1	7.58		7.58	7.58	7.58	7.58	7.58	7.58	7.58	7.58	7.58	7.58	7.58	0.70952	1.0319		34745	N/A	5.94	6.31	6.68	7.12	7.24	7.37	7.43	7.45	7.7	7.58	1995-02-15	1
1	1	1	1	1	7.57		7.57	7.57	7.57	7.57	7.57	7.57	7.57	7.57	7.57	7.57	7.57	0.757274	1.09393		34746	N/A	5.85	6.25	6.58	7.02	7.16	7.29	7.39	7.4	7.7	7.57	1995-02-16	1
1	1	1	1	1	7.59		7.59	7.59	7.59	7.59	7.59	7.59	7.59	7.59	7.59	7.59	7.59	0.754694	1.09299		34747	N/A	5.86	6.26	6.62	7.07	7.2	7.33	7.41	7.43	7.71	7.59	1995-02-17	1
1	1	1	1	1	7.61		7.61	7.61	7.61	7.61	7.61	7.61	7.61	7.61	7.61	7.61	7.61	0.743028	1.07437		34751	N/A	5.92	6.29	6.66	7.09	7.22	7.35	7.42	7.44	7.74	7.61	1995-02-21	1
1	1	1	1	1	7.54		7.54	7.54	7.54	7.54	7.54	7.54	7.54	7.54	7.54	7.54	7.54	0.780728	1.11534		34752	N/A	5.85	6.17	6.49	6.92	7.04	7.2	7.29	7.34	7.67	7.54	1995-02-22	1
1	1	1	1	1	7.56		7.56	7.56	7.56	7.56	7.56	7.56	7.56	7.56	7.56	7.56	7.56	0.783866	1.11517		34753	N/A	5.88	6.18	6.52	6.92	7.03	7.2	7.3	7.34	7.68	7.56	1995-02-23	1
1	1	1	1	1	7.54		7.54	7.54	7.54	7.54	7.54	7.54	7.54	7.54	7.54	7.54	7.54	0.778191	1.10538		34754	N/A	5.88	6.18	6.5	6.89	7	7.16	7.3	7.33	7.66	7.54	1995-02-24	1
1	1	1	1	1	7.49		7.49	7.49	7.49	7.49	7.49	7.49	7.49	7.49	7.49	7.49	7.49	0.771498	1.08142		34757	N/A	5.92	6.16	6.43	6.79	6.9	7.06	7.19	7.24	7.61	7.49	1995-02-27	1
1	1	1	1	1	7.46		7.46	7.46	7.46	7.46	7.46	7.46	7.46	7.46	7.46	7.46	7.46	0.741883	1.04044		34758	N/A	5.94	6.19	6.44	6.79	6.9	7.06	7.15	7.22	7.58	7.46	1995-02-28	1
1	1	1	1	1	7.45		7.45	7.45	7.45	7.45	7.45	7.45	7.45	7.45	7.45	7.45	7.45	0.727486	1.02444		34759	N/A	5.94	6.21	6.44	6.81	6.92	7.06	7.17	7.23	7.57	7.45	1995-03-01	1
1	1	1	1	1	7.5		7.5	7.5	7.5	7.5	7.5	7.5	7.5	7.5	7.5	7.5	7.5	0.735719	1.04444		34760	N/A	5.93	6.21	6.53	6.88	7	7.15	7.23	7.3	7.62	7.5	1995-03-02	1
1	1	1	1	1	7.56		7.56	7.56	7.56	7.56	7.56	7.56	7.56	7.56	7.56	7.56	7.56	0.771439	1.09555		34761	N/A	5.91	6.23	6.53	6.89	7.03	7.19	7.29	7.36	7.68	7.56	1995-03-03	1
1	1	1	1	1	7.59		7.59	7.59	7.59	7.59	7.59	7.59	7.59	7.59	7.59	7.59	7.59	0.756968	1.08032		34764	N/A	5.94	6.28	6.59	6.96	7.1	7.24	7.36	7.41	7.73	7.59	1995-03-06	1
1	1	1	1	1	7.64		7.64	7.64	7.64	7.64	7.64	7.64	7.64	7.64	7.64	7.64	7.64	0.77704	1.10537		34765	N/A	5.96	6.3	6.6	7	7.12	7.28	7.37	7.44	7.78	7.64	1995-03-07	1
1	1	1	1	1	7.56		7.56	7.56	7.56	7.56	7.56	7.56	7.56	7.56	7.56	7.56	7.56	0.750666	1.06574		34766	N/A	5.95	6.26	6.56	6.93	7.05	7.2	7.29	7.36	7.69	7.56	1995-03-08	1
1	1	1	1	1	7.53		7.53	7.53	7.53	7.53	7.53	7.53	7.53	7.53	7.53	7.53	7.53	0.776578	1.09365		34767	N/A	5.91	6.21	6.47	6.83	6.97	7.11	7.22	7.3	7.65	7.53	1995-03-09	1
1	1	1	1	1	7.46		7.46	7.46	7.46	7.46	7.46	7.46	7.46	7.46	7.46	7.46	7.46	0.720417	1.01246		34768	N/A	5.96	6.22	6.49	6.83	6.94	7.07	7.15	7.23	7.57	7.46	1995-03-10	1
1	1	1	1	1	7.45		7.45	7.45	7.45	7.45	7.45	7.45	7.45	7.45	7.45	7.45	7.45	0.742202	1.03332		34771	N/A	5.94	6.2	6.44	6.76	6.88	7.01	7.1	7.19	7.56	7.45	1995-03-13	1
1	1	1	1	1	7.35		7.35	7.35	7.35	7.35	7.35	7.35	7.35	7.35	7.35	7.35	7.35	0.702042	0.97391		34772	N/A	5.93	6.18	6.39	6.69	6.8	6.93	7	7.09	7.45	7.35	1995-03-14	1
1	1	1	1	1	7.36		7.36	7.36	7.36	7.36	7.36	7.36	7.36	7.36	7.36	7.36	7.36	0.706914	0.978877		34773	N/A	5.92	6.18	6.41	6.71	6.8	6.93	7.01	7.09	7.47	7.36	1995-03-15	1
1	1	1	1	1	7.33		7.33	7.33	7.33	7.33	7.33	7.33	7.33	7.33	7.33	7.33	7.33	0.705414	0.973643		34774	N/A	5.92	6.16	6.35	6.68	6.76	6.89	6.98	7.05	7.45	7.33	1995-03-16	1
1	1	1	1	1	7.37		7.37	7.37	7.37	7.37	7.37	7.37	7.37	7.37	7.37	7.37	7.37	0.718161	1.0029		34775	N/A	5.92	6.16	6.37	6.69	6.81	6.97	7.06	7.12	7.48	7.37	1995-03-17	1
1	1	1	1	1	7.4		7.4	7.4	7.4	7.4	7.4	7.4	7.4	7.4	7.4	7.4	7.4	0.734878	1.02121		34778	N/A	5.93	6.18	6.37	6.69	6.81	6.98	7.07	7.12	7.52	7.4	1995-03-20	1
1	1	1	1	1	7.43		7.43	7.43	7.43	7.43	7.43	7.43	7.43	7.43	7.43	7.43	7.43	0.751635	1.04772		34779	N/A	5.92	6.17	6.38	6.71	6.84	7.01	7.1	7.16	7.57	7.43	1995-03-21	1
1	1	1	1	1	7.46		7.46	7.46	7.46	7.46	7.46	7.46	7.46	7.46	7.46	7.46	7.46	0.76452	1.07204		34780	N/A	5.91	6.15	6.4	6.75	6.87	7.05	7.16	7.21	7.58	7.46	1995-03-22	1
1	1	1	1	1	7.47		7.47	7.47	7.47	7.47	7.47	7.47	7.47	7.47	7.47	7.47	7.47	0.779674	1.09287		34781	N/A	5.89	6.14	6.38	6.75	6.87	7.06	7.15	7.21	7.6	7.47	1995-03-23	1
1	1	1	1	1	7.38		7.38	7.38	7.38	7.38	7.38	7.38	7.38	7.38	7.38	7.38	7.38	0.766325	1.06267		34782	N/A	5.85	6.11	6.31	6.64	6.75	6.93	7.04	7.09	7.5	7.38	1995-03-24	1
1	1	1	1	1	7.33		7.33	7.33	7.33	7.33	7.33	7.33	7.33	7.33	7.33	7.33	7.33	0.758485	1.05564		34785	N/A	5.82	6.04	6.27	6.62	6.72	6.9	7	7.05	7.44	7.33	1995-03-27	1
1	1	1	1	1	7.41		7.41	7.41	7.41	7.41	7.41	7.41	7.41	7.41	7.41	7.41	7.41	0.748338	1.05107		34786	N/A	5.89	6.11	6.38	6.73	6.85	7.02	7.1	7.16	7.52	7.41	1995-03-28	1
1	1	1	1	1	7.4		7.4	7.4	7.4	7.4	7.4	7.4	7.4	7.4	7.4	7.4	7.4	0.767635	1.08024		34787	N/A	5.84	6.04	6.35	6.73	6.83	6.98	7.12	7.16	7.5	7.4	1995-03-29	1
1	1	1	1	1	7.43		7.43	7.43	7.43	7.43	7.43	7.43	7.43	7.43	7.43	7.43	7.43	0.752324	1.06022		34788	N/A	5.88	6.1	6.43	6.76	6.88	7.05	7.14	7.18	7.54	7.43	1995-03-30	1
1	1	1	1	1	7.44		7.44	7.44	7.44	7.44	7.44	7.44	7.44	7.44	7.44	7.44	7.44	0.73869	1.04516		34789	N/A	5.88	6.13	6.49	6.8	6.92	7.08	7.17	7.2	7.54	7.44	1995-03-31	1
1	1	1	1	1	7.39		7.39	7.39	7.39	7.39	7.39	7.39	7.39	7.39	7.39	7.39	7.39	0.704621	0.98588		34792	N/A	5.94	6.18	6.45	6.75	6.86	7	7.08	7.14	7.49	7.39	1995-04-03	1
1	1	1	1	1	7.38		7.38	7.38	7.38	7.38	7.38	7.38	7.38	7.38	7.38	7.38	7.38	0.724901	1.00828		34793	N/A	5.91	6.15	6.4	6.71	6.82	6.96	7.02	7.12	7.48	7.38	1995-04-04	1
1	1	1	1	1	7.38		7.38	7.38	7.38	7.38	7.38	7.38	7.38	7.38	7.38	7.38	7.38	0.735737	1.02712		34794	N/A	5.88	6.13	6.38	6.7	6.81	6.97	7.05	7.12	7.48	7.38	1995-04-05	1
1	1	1	1	1	7.36		7.36	7.36	7.36	7.36	7.36	7.36	7.36	7.36	7.36	7.36	7.36	0.750339	1.04345		34795	N/A	5.85	6.09	6.33	6.66	6.77	6.92	7.01	7.09	7.47	7.36	1995-04-06	1
1	1	1	1	1	7.39		7.39	7.39	7.39	7.39	7.39	7.39	7.39	7.39	7.39	7.39	7.39	0.76899	1.06548		34796	N/A	5.86	6.1	6.33	6.65	6.76	6.93	7.03	7.11	7.5	7.39	1995-04-07	1
1	1	1	1	1	7.39		7.39	7.39	7.39	7.39	7.39	7.39	7.39	7.39	7.39	7.39	7.39	0.77128	1.07184		34799	N/A	5.85	6.08	6.33	6.66	6.77	6.94	7.03	7.12	7.49	7.39	1995-04-10	1
1	1	1	1	1	7.37		7.37	7.37	7.37	7.37	7.37	7.37	7.37	7.37	7.37	7.37	7.37	0.767096	1.06517		34800	N/A	5.84	6.07	6.31	6.65	6.76	6.92	7	7.09	7.47	7.37	1995-04-11	1
1	1	1	1	1	7.36		7.36	7.36	7.36	7.36	7.36	7.36	7.36	7.36	7.36	7.36	7.36	0.781479	1.08101		34801	N/A	5.82	6.04	6.28	6.61	6.72	6.89	6.98	7.06	7.46	7.36	1995-04-12	1
1	1	1	1	1	7.34		7.34	7.34	7.34	7.34	7.34	7.34	7.34	7.34	7.34	7.34	7.34	0.820742	1.12801		34802	N/A	5.75	5.99	6.19	6.51	6.64	6.82	6.91	7.03	7.42	7.34	1995-04-13	1
1	1	1	1	1	7.39		7.39	7.39	7.39	7.39	7.39	7.39	7.39	7.39	7.39	7.39	7.39	0.856075	1.16003		34806	N/A	5.8	6	6.19	6.48	6.6	6.8	6.91	7.04	7.48	7.39	1995-04-17	1
1	1	1	1	1	7.4		7.4	7.4	7.4	7.4	7.4	7.4	7.4	7.4	7.4	7.4	7.4	0.885196	1.19408		34807	N/A	5.79	5.95	6.17	6.44	6.56	6.77	6.9	7.04	7.49	7.4	1995-04-18	1
1	1	1	1	1	7.37		7.37	7.37	7.37	7.37	7.37	7.37	7.37	7.37	7.37	7.37	7.37	0.834936	1.14066		34808	N/A	5.8	5.98	6.2	6.51	6.62	6.82	6.93	7.06	7.46	7.37	1995-04-19	1
1	1	1	1	1	7.35		7.35	7.35	7.35	7.35	7.35	7.35	7.35	7.35	7.35	7.35	7.35	0.853075	1.15648		34809	N/A	5.77	5.97	6.15	6.43	6.56	6.76	6.87	7.02	7.43	7.35	1995-04-20	1
1	1	1	1	1	7.34		7.34	7.34	7.34	7.34	7.34	7.34	7.34	7.34	7.34	7.34	7.34	0.840097	1.13826		34810	N/A	5.79	5.98	6.15	6.44	6.55	6.77	6.87	7.01	7.42	7.34	1995-04-21	1
1	1	1	1	1	7.32		7.32	7.32	7.32	7.32	7.32	7.32	7.32	7.32	7.32	7.32	7.32	0.808326	1.09769		34813	N/A	5.83	6	6.17	6.46	6.58	6.77	6.86	7.01	7.39	7.32	1995-04-24	1
1	1	1	1	1	7.33		7.33	7.33	7.33	7.33	7.33	7.33	7.33	7.33	7.33	7.33	7.33	0.80257	1.09132		34814	N/A	5.85	6.01	6.19	6.48	6.61	6.79	6.87	7.01	7.41	7.33	1995-04-25	1
1	1	1	1	1	7.32		7.32	7.32	7.32	7.32	7.32	7.32	7.32	7.32	7.32	7.32	7.32	0.787539	1.07288		34815	N/A	5.85	6.02	6.21	6.5	6.62	6.79	6.88	7.01	7.4	7.32	1995-04-26	1
1	1	1	1	1	7.33		7.33	7.33	7.33	7.33	7.33	7.33	7.33	7.33	7.33	7.33	7.33	0.759773	1.04056		34816	N/A	5.87	6.06	6.3	6.55	6.67	6.84	6.92	7.04	7.42	7.33	1995-04-27	1
1	1	1	1	1	7.34		7.34	7.34	7.34	7.34	7.34	7.34	7.34	7.34	7.34	7.34	7.34	0.748568	1.0331		34817	N/A	5.87	6.08	6.32	6.6	6.72	6.88	6.95	7.07	7.42	7.34	1995-04-28	1
1	1	1	1	1	7.35		7.35	7.35	7.35	7.35	7.35	7.35	7.35	7.35	7.35	7.35	7.35	0.738155	1.02029		34820	N/A	5.91	6.11	6.32	6.62	6.75	6.9	6.96	7.09	7.43	7.35	1995-05-01	1
1	1	1	1	1	7.33		7.33	7.33	7.33	7.33	7.33	7.33	7.33	7.33	7.33	7.33	7.33	0.763336	1.0455		34821	N/A	5.89	6.05	6.26	6.55	6.67	6.83	6.92	7.04	7.41	7.33	1995-05-02	1
1	1	1	1	1	7.25		7.25	7.25	7.25	7.25	7.25	7.25	7.25	7.25	7.25	7.25	7.25	0.765352	1.04144		34822	N/A	5.84	5.97	6.16	6.47	6.56	6.73	6.82	6.96	7.32	7.25	1995-05-03	1
1	1	1	1	1	7.15		7.15	7.15	7.15	7.15	7.15	7.15	7.15	7.15	7.15	7.15	7.15	0.751253	1.01803		34823	N/A	5.78	5.9	6.1	6.35	6.46	6.63	6.72	6.85	7.22	7.15	1995-05-04	1
1	1	1	1	1	7.02		7.02	7.02	7.02	7.02	7.02	7.02	7.02	7.02	7.02	7.02	7.02	0.746221	0.986965		34824	N/A	5.74	5.85	5.96	6.16	6.27	6.42	6.55	6.69	7.07	7.02	1995-05-05	1
1	1	1	1	1	7.02		7.02	7.02	7.02	7.02	7.02	7.02	7.02	7.02	7.02	7.02	7.02	0.713735	0.940415		34827	N/A	5.81	5.91	6.01	6.18	6.3	6.44	6.55	6.7	7.08	7.02	1995-05-08	1
1	1	1	1	1	6.94		6.94	6.94	6.94	6.94	6.94	6.94	6.94	6.94	6.94	6.94	6.94	0.697691	0.900944		34828	N/A	5.81	5.9	5.96	6.08	6.19	6.33	6.44	6.61	6.99	6.94	1995-05-09	1
1	1	1	1	1	6.97		6.97	6.97	6.97	6.97	6.97	6.97	6.97	6.97	6.97	6.97	6.97	0.702787	0.919467		34829	N/A	5.82	5.9	5.96	6.11	6.23	6.39	6.5	6.66	7.04	6.97	1995-05-10	1
1	1	1	1	1	6.99		6.99	6.99	6.99	6.99	6.99	6.99	6.99	6.99	6.99	6.99	6.99	0.676824	0.890966		34830	N/A	5.84	5.95	6.02	6.2	6.3	6.45	6.54	6.68	7.05	6.99	1995-05-11	1
1	1	1	1	1	7		7	7	7	7	7	7	7	7	7	7	7	0.675614	0.887626		34831	N/A	5.87	5.96	6.03	6.2	6.31	6.46	6.55	6.67	7.05	7	1995-05-12	1
1	1	1	1	1	6.95		6.95	6.95	6.95	6.95	6.95	6.95	6.95	6.95	6.95	6.95	6.95	0.65929	0.859139		34834	N/A	5.88	5.95	5.99	6.16	6.26	6.41	6.49	6.62	7	6.95	1995-05-15	1
1	1	1	1	1	6.87		6.87	6.87	6.87	6.87	6.87	6.87	6.87	6.87	6.87	6.87	6.87	0.624936	0.815757		34835	N/A	5.87	5.91	5.96	6.11	6.22	6.36	6.43	6.57	6.92	6.87	1995-05-16	1
1	1	1	1	1	6.86		6.86	6.86	6.86	6.86	6.86	6.86	6.86	6.86	6.86	6.86	6.86	0.625133	0.811554		34836	N/A	5.86	5.91	5.95	6.11	6.21	6.35	6.4	6.53	6.91	6.86	1995-05-17	1
1	1	1	1	1	6.91		6.91	6.91	6.91	6.91	6.91	6.91	6.91	6.91	6.91	6.91	6.91	0.619714	0.818059		34837	N/A	5.87	5.95	6.01	6.18	6.28	6.44	6.5	6.61	6.96	6.91	1995-05-18	1
1	1	1	1	1	6.91		6.91	6.91	6.91	6.91	6.91	6.91	6.91	6.91	6.91	6.91	6.91	0.619347	0.816284		34838	N/A	5.87	5.95	6.01	6.19	6.28	6.43	6.5	6.61	6.96	6.91	1995-05-19	1
1	1	1	1	1	6.92		6.92	6.92	6.92	6.92	6.92	6.92	6.92	6.92	6.92	6.92	6.92	0.607663	0.801249		34841	N/A	5.91	5.99	6.03	6.19	6.3	6.46	6.51	6.63	6.98	6.92	1995-05-22	1
1	1	1	1	1	6.87		6.87	6.87	6.87	6.87	6.87	6.87	6.87	6.87	6.87	6.87	6.87	0.603949	0.784615		34842	N/A	5.91	5.96	5.97	6.15	6.22	6.37	6.46	6.57	6.93	6.87	1995-05-23	1
1	1	1	1	1	6.77		6.77	6.77	6.77	6.77	6.77	6.77	6.77	6.77	6.77	6.77	6.77	0.610819	0.773318		34843	N/A	5.87	5.89	5.86	6.01	6.08	6.2	6.32	6.44	6.81	6.77	1995-05-24	1
1	1	1	1	1	6.73		6.73	6.73	6.73	6.73	6.73	6.73	6.73	6.73	6.73	6.73	6.73	0.590223	0.741741		34844	N/A	5.84	5.89	5.89	5.99	6.06	6.18	6.27	6.39	6.78	6.73	1995-05-25	1
1	1	1	1	1	6.75		6.75	6.75	6.75	6.75	6.75	6.75	6.75	6.75	6.75	6.75	6.75	0.611355	0.76818		34845	N/A	5.84	5.89	5.87	5.97	6.05	6.18	6.28	6.4	6.8	6.75	1995-05-26	1
1	1	1	1	1	6.67		6.67	6.67	6.67	6.67	6.67	6.67	6.67	6.67	6.67	6.67	6.67	0.599826	0.738377		34849	N/A	5.81	5.85	5.83	5.89	5.96	6.08	6.18	6.3	6.72	6.67	1995-05-30	1
1	1	1	1	1	6.67		6.67	6.67	6.67	6.67	6.67	6.67	6.67	6.67	6.67	6.67	6.67	0.607267	0.749733		34850	N/A	5.81	5.83	5.8	5.89	5.95	6.08	6.18	6.3	6.72	6.67	1995-05-31	1
1	1	1	1	1	6.61		6.61	6.61	6.61	6.61	6.61	6.61	6.61	6.61	6.61	6.61	6.61	0.674213	0.820792		34851	N/A	5.67	5.71	5.68	5.71	5.78	5.94	6.04	6.2	6.64	6.61	1995-06-01	1
1	1	1	1	1	6.52		6.52	6.52	6.52	6.52	6.52	6.52	6.52	6.52	6.52	6.52	6.52	0.715739	0.872353		34852	N/A	5.58	5.55	5.51	5.54	5.64	5.8	5.92	6.1	6.55	6.52	1995-06-02	1
1	1	1	1	1	6.51		6.51	6.51	6.51	6.51	6.51	6.51	6.51	6.51	6.51	6.51	6.51	0.690626	0.827031		34855	N/A	5.68	5.61	5.52	5.54	5.63	5.79	5.92	6.08	6.54	6.51	1995-06-05	1
1	1	1	1	1	6.51		6.51	6.51	6.51	6.51	6.51	6.51	6.51	6.51	6.51	6.51	6.51	0.668213	0.804102		34856	N/A	5.69	5.63	5.56	5.57	5.67	5.83	5.94	6.08	6.54	6.51	1995-06-06	1
1	1	1	1	1	6.53		6.53	6.53	6.53	6.53	6.53	6.53	6.53	6.53	6.53	6.53	6.53	0.577786	0.711196		34857	N/A	5.74	5.75	5.71	5.74	5.84	5.95	6.06	6.2	6.56	6.53	1995-06-07	1
1	1	1	1	1	6.57		6.57	6.57	6.57	6.57	6.57	6.57	6.57	6.57	6.57	6.57	6.57	0.565251	0.700157		34858	N/A	5.76	5.79	5.78	5.82	5.91	6.02	6.12	6.22	6.59	6.57	1995-06-08	1
1	1	1	1	1	6.72		6.72	6.72	6.72	6.72	6.72	6.72	6.72	6.72	6.72	6.72	6.72	0.585965	0.753007		34859	N/A	5.77	5.86	5.89	6.01	6.08	6.21	6.31	6.4	6.76	6.72	1995-06-09	1
1	1	1	1	1	6.71		6.71	6.71	6.71	6.71	6.71	6.71	6.71	6.71	6.71	6.71	6.71	0.615733	0.788327		34862	N/A	5.73	5.81	5.83	5.96	6.04	6.16	6.27	6.37	6.76	6.71	1995-06-12	1
1	1	1	1	1	6.56		6.56	6.56	6.56	6.56	6.56	6.56	6.56	6.56	6.56	6.56	6.56	0.690389	0.849988		34863	N/A	5.61	5.63	5.57	5.63	5.73	5.88	6.01	6.14	6.58	6.56	1995-06-13	1
1	1	1	1	1	6.57		6.57	6.57	6.57	6.57	6.57	6.57	6.57	6.57	6.57	6.57	6.57	0.687075	0.841118		34864	N/A	5.61	5.64	5.6	5.67	5.74	5.88	6.01	6.15	6.59	6.57	1995-06-14	1
1	1	1	1	1	6.61		6.61	6.61	6.61	6.61	6.61	6.61	6.61	6.61	6.61	6.61	6.61	0.674699	0.827961		34865	N/A	5.65	5.71	5.65	5.73	5.81	5.93	6.07	6.18	6.64	6.61	1995-06-15	1
1	1	1	1	1	6.62		6.62	6.62	6.62	6.62	6.62	6.62	6.62	6.62	6.62	6.62	6.62	0.668866	0.826087		34866	N/A	5.66	5.7	5.66	5.77	5.83	5.96	6.09	6.21	6.64	6.62	1995-06-16	1
1	1	1	1	1	6.56		6.56	6.56	6.56	6.56	6.56	6.56	6.56	6.56	6.56	6.56	6.56	0.682049	0.834302		34869	N/A	5.63	5.64	5.59	5.65	5.74	5.87	6.01	6.13	6.59	6.56	1995-06-19	1
1	1	1	1	1	6.57		6.57	6.57	6.57	6.57	6.57	6.57	6.57	6.57	6.57	6.57	6.57	0.652262	0.803231		34870	N/A	5.65	5.68	5.64	5.72	5.8	5.92	6.05	6.16	6.58	6.57	1995-06-20	1
1	1	1	1	1	6.55		6.55	6.55	6.55	6.55	6.55	6.55	6.55	6.55	6.55	6.55	6.55	0.664106	0.816615		34871	N/A	5.6	5.65	5.62	5.68	5.76	5.89	6.02	6.13	6.56	6.55	1995-06-21	1
1	1	1	1	1	6.48		6.48	6.48	6.48	6.48	6.48	6.48	6.48	6.48	6.48	6.48	6.48	0.670359	0.814543		34872	N/A	5.54	5.6	5.53	5.61	5.67	5.8	5.92	6.04	6.47	6.48	1995-06-22	1
1	1	1	1	1	6.51		6.51	6.51	6.51	6.51	6.51	6.51	6.51	6.51	6.51	6.51	6.51	0.67907	0.825869		34873	N/A	5.54	5.61	5.56	5.64	5.69	5.83	5.94	6.06	6.51	6.51	1995-06-23	1
1	1	1	1	1	6.54		6.54	6.54	6.54	6.54	6.54	6.54	6.54	6.54	6.54	6.54	6.54	0.676737	0.843066		34876	N/A	5.52	5.57	5.6	5.71	5.76	5.9	6.01	6.11	6.55	6.54	1995-06-26	1
1	1	1	1	1	6.56		6.56	6.56	6.56	6.56	6.56	6.56	6.56	6.56	6.56	6.56	6.56	0.662639	0.828179		34877	N/A	5.59	5.61	5.64	5.7	5.8	5.94	6.04	6.15	6.57	6.56	1995-06-27	1
1	1	1	1	1	6.52		6.52	6.52	6.52	6.52	6.52	6.52	6.52	6.52	6.52	6.52	6.52	0.6644	0.825966		34878	N/A	5.57	5.57	5.58	5.67	5.76	5.88	5.99	6.1	6.53	6.52	1995-06-28	1
1	1	1	1	1	6.65		6.65	6.65	6.65	6.65	6.65	6.65	6.65	6.65	6.65	6.65	6.65	0.640731	0.8161		34879	N/A	5.67	5.65	5.76	5.89	5.95	6.07	6.18	6.28	6.69	6.65	1995-06-29	1
1	1	1	1	1	6.63		6.63	6.63	6.63	6.63	6.63	6.63	6.63	6.63	6.63	6.63	6.63	0.689539	0.872754		34880	N/A	5.6	5.59	5.65	5.79	5.88	5.98	6.12	6.21	6.64	6.63	1995-06-30	1
1	1	1	1	1	6.63		6.63	6.63	6.63	6.63	6.63	6.63	6.63	6.63	6.63	6.63	6.63	0.66647	0.833427		34883	N/A	5.68	5.7	5.63	5.79	5.87	5.97	6.16	6.21	6.68	6.63	1995-07-03	1
1	1	1	1	1	6.61		6.61	6.61	6.61	6.61	6.61	6.61	6.61	6.61	6.61	6.61	6.61	0.662379	0.822229		34885	N/A	5.68	5.69	5.62	5.78	5.84	5.95	6.12	6.19	6.64	6.61	1995-07-05	1
1	1	1	1	1	6.51		6.51	6.51	6.51	6.51	6.51	6.51	6.51	6.51	6.51	6.51	6.51	0.731592	0.899933		34886	N/A	5.53	5.5	5.43	5.56	5.64	5.75	5.97	6.05	6.53	6.51	1995-07-06	1
1	1	1	1	1	6.52		6.52	6.52	6.52	6.52	6.52	6.52	6.52	6.52	6.52	6.52	6.52	0.749212	0.913367		34887	N/A	5.54	5.5	5.42	5.54	5.61	5.74	5.94	6.04	6.52	6.52	1995-07-07	1
1	1	1	1	1	6.51		6.51	6.51	6.51	6.51	6.51	6.51	6.51	6.51	6.51	6.51	6.51	0.733256	0.893275		34890	N/A	5.53	5.53	5.43	5.56	5.63	5.74	5.93	6.04	6.51	6.51	1995-07-10	1
1	1	1	1	1	6.57		6.57	6.57	6.57	6.57	6.57	6.57	6.57	6.57	6.57	6.57	6.57	0.746178	0.915478		34891	N/A	5.56	5.57	5.47	5.59	5.69	5.8	5.99	6.09	6.57	6.57	1995-07-11	1
1	1	1	1	1	6.55		6.55	6.55	6.55	6.55	6.55	6.55	6.55	6.55	6.55	6.55	6.55	0.735076	0.911449		34892	N/A	5.55	5.55	5.44	5.59	5.7	5.8	6	6.1	6.55	6.55	1995-07-12	1
1	1	1	1	1	6.55		6.55	6.55	6.55	6.55	6.55	6.55	6.55	6.55	6.55	6.55	6.55	0.73056	0.902408		34893	N/A	5.55	5.55	5.46	5.61	5.7	5.8	6	6.09	6.56	6.55	1995-07-13	1
1	1	1	1	1	6.6		6.6	6.6	6.6	6.6	6.6	6.6	6.6	6.6	6.6	6.6	6.6	0.714467	0.889393		34894	N/A	5.59	5.61	5.53	5.7	5.78	5.89	6.07	6.15	6.61	6.6	1995-07-14	1
1	1	1	1	1	6.67		6.67	6.67	6.67	6.67	6.67	6.67	6.67	6.67	6.67	6.67	6.67	0.729072	0.919522		34897	N/A	5.63	5.63	5.55	5.77	5.86	5.97	6.15	6.22	6.69	6.67	1995-07-17	1
1	1	1	1	1	6.73		6.73	6.73	6.73	6.73	6.73	6.73	6.73	6.73	6.73	6.73	6.73	0.767132	0.97279		34898	N/A	5.61	5.63	5.57	5.77	5.88	6.01	6.21	6.25	6.74	6.73	1995-07-18	1
1	1	1	1	1	6.89		6.89	6.89	6.89	6.89	6.89	6.89	6.89	6.89	6.89	6.89	6.89	0.839778	1.08792		34899	N/A	5.58	5.65	5.6	5.89	5.99	6.15	6.37	6.43	6.9	6.89	1995-07-19	1
1	1	1	1	1	6.87		6.87	6.87	6.87	6.87	6.87	6.87	6.87	6.87	6.87	6.87	6.87	0.796646	1.02919		34900	N/A	5.6	5.68	5.71	5.91	6.02	6.15	6.37	6.43	6.89	6.87	1995-07-20	1
1	1	1	1	1	6.96		6.96	6.96	6.96	6.96	6.96	6.96	6.96	6.96	6.96	6.96	6.96	0.831521	1.08575		34901	N/A	5.61	5.7	5.75	5.95	6.11	6.26	6.4	6.53	6.98	6.96	1995-07-21	1
1	1	1	1	1	6.9		6.9	6.9	6.9	6.9	6.9	6.9	6.9	6.9	6.9	6.9	6.9	0.794641	1.03343		34904	N/A	5.61	5.68	5.75	5.97	6.08	6.2	6.4	6.46	6.91	6.9	1995-07-24	1
1	1	1	1	1	6.84		6.84	6.84	6.84	6.84	6.84	6.84	6.84	6.84	6.84	6.84	6.84	0.752988	0.983067		34905	N/A	5.62	5.68	5.75	5.94	6.07	6.19	6.37	6.43	6.86	6.84	1995-07-25	1
1	1	1	1	1	6.9		6.9	6.9	6.9	6.9	6.9	6.9	6.9	6.9	6.9	6.9	6.9	0.784596	1.02846		34906	N/A	5.63	5.68	5.75	5.97	6.1	6.24	6.42	6.48	6.92	6.9	1995-07-26	1
1	1	1	1	1	6.84		6.84	6.84	6.84	6.84	6.84	6.84	6.84	6.84	6.84	6.84	6.84	0.79046	1.03755		34907	N/A	5.58	5.6	5.66	5.91	6.03	6.18	6.36	6.43	6.86	6.84	1995-07-27	1
1	1	1	1	1	6.91		6.91	6.91	6.91	6.91	6.91	6.91	6.91	6.91	6.91	6.91	6.91	0.826427	1.0888		34908	N/A	5.58	5.61	5.69	5.92	6.09	6.22	6.4	6.49	6.93	6.91	1995-07-28	1
1	1	1	1	1	6.86		6.86	6.86	6.86	6.86	6.86	6.86	6.86	6.86	6.86	6.86	6.86	0.80347	1.04661		34911	N/A	5.6	5.63	5.67	5.88	6.02	6.16	6.35	6.45	6.88	6.86	1995-07-31	1
1	1	1	1	1	6.92		6.92	6.92	6.92	6.92	6.92	6.92	6.92	6.92	6.92	6.92	6.92	0.817224	1.068		34912	N/A	5.61	5.67	5.71	5.94	6.08	6.22	6.4	6.5	6.95	6.92	1995-08-01	1
1	1	1	1	1	6.86		6.86	6.86	6.86	6.86	6.86	6.86	6.86	6.86	6.86	6.86	6.86	0.809377	1.05506		34913	N/A	5.59	5.63	5.66	5.86	6.03	6.15	6.34	6.44	6.88	6.86	1995-08-02	1
1	1	1	1	1	6.93		6.93	6.93	6.93	6.93	6.93	6.93	6.93	6.93	6.93	6.93	6.93	0.824533	1.08408		34914	N/A	5.59	5.67	5.7	5.94	6.09	6.24	6.42	6.53	6.95	6.93	1995-08-03	1
1	1	1	1	1	6.9		6.9	6.9	6.9	6.9	6.9	6.9	6.9	6.9	6.9	6.9	6.9	0.821008	1.07689		34915	N/A	5.58	5.64	5.68	5.91	6.06	6.2	6.39	6.5	6.92	6.9	1995-08-04	1
1	1	1	1	1	6.89		6.89	6.89	6.89	6.89	6.89	6.89	6.89	6.89	6.89	6.89	6.89	0.824682	1.07689		34918	N/A	5.57	5.63	5.67	5.9	6.03	6.18	6.37	6.48	6.91	6.89	1995-08-07	1
1	1	1	1	1	6.89		6.89	6.89	6.89	6.89	6.89	6.89	6.89	6.89	6.89	6.89	6.89	0.829984	1.07957		34919	N/A	5.55	5.63	5.68	5.9	6.01	6.17	6.36	6.47	6.9	6.89	1995-08-08	1
1	1	1	1	1	6.93		6.93	6.93	6.93	6.93	6.93	6.93	6.93	6.93	6.93	6.93	6.93	0.846909	1.10494		34920	N/A	5.56	5.63	5.69	5.93	6.05	6.21	6.4	6.47	6.93	6.93	1995-08-09	1
1	1	1	1	1	6.9		6.9	6.9	6.9	6.9	6.9	6.9	6.9	6.9	6.9	6.9	6.9	0.80697	1.06526		34921	N/A	5.57	5.65	5.7	5.95	6.07	6.25	6.43	6.51	6.97	6.9	1995-08-10	1
1	1	1	1	1	6.98		6.98	6.98	6.98	6.98	6.98	6.98	6.98	6.98	6.98	6.98	6.98	0.80626	1.07725		34922	N/A	5.59	5.71	5.8	6.05	6.19	6.37	6.54	6.59	7.06	6.98	1995-08-11	1
1	1	1	1	1	6.96		6.96	6.96	6.96	6.96	6.96	6.96	6.96	6.96	6.96	6.96	6.96	0.791391	1.05954		34925	N/A	5.6	5.69	5.81	6.05	6.19	6.36	6.54	6.59	7.06	6.96	1995-08-14	1
1	1	1	1	1	6.92		6.92	6.92	6.92	6.92	6.92	6.92	6.92	6.92	6.92	6.92	6.92	0.738869	0.990929		34926	N/A	5.62	5.72	5.86	6.11	6.21	6.37	6.52	6.57	7	6.92	1995-08-15	1
1	1	1	1	1	6.89		6.89	6.89	6.89	6.89	6.89	6.89	6.89	6.89	6.89	6.89	6.89	0.736885	0.985403		34927	N/A	5.6	5.7	5.84	6.07	6.18	6.32	6.49	6.54	6.97	6.89	1995-08-16	1
1	1	1	1	1	6.9		6.9	6.9	6.9	6.9	6.9	6.9	6.9	6.9	6.9	6.9	6.9	0.716012	0.965557		34928	N/A	5.61	5.73	5.89	6.12	6.24	6.37	6.52	6.57	6.99	6.9	1995-08-17	1
1	1	1	1	1	6.91		6.91	6.91	6.91	6.91	6.91	6.91	6.91	6.91	6.91	6.91	6.91	0.726792	0.977282		34929	N/A	5.61	5.72	5.88	6.13	6.24	6.36	6.51	6.57	7	6.91	1995-08-18	1
1	1	1	1	1	6.87		6.87	6.87	6.87	6.87	6.87	6.87	6.87	6.87	6.87	6.87	6.87	0.718673	0.960875		34932	N/A	5.62	5.7	5.84	6.08	6.18	6.31	6.47	6.54	6.95	6.87	1995-08-21	1
1	1	1	1	1	6.89		6.89	6.89	6.89	6.89	6.89	6.89	6.89	6.89	6.89	6.89	6.89	0.717115	0.964147		34933	N/A	5.63	5.7	5.88	6.1	6.21	6.35	6.51	6.57	6.98	6.89	1995-08-22	1
1	1	1	1	1	6.92		6.92	6.92	6.92	6.92	6.92	6.92	6.92	6.92	6.92	6.92	6.92	0.741093	1.00139		34934	N/A	5.6	5.69	5.87	6.11	6.24	6.37	6.53	6.6	7.01	6.92	1995-08-23	1
1	1	1	1	1	6.84		6.84	6.84	6.84	6.84	6.84	6.84	6.84	6.84	6.84	6.84	6.84	0.755808	1.01297		34935	N/A	5.52	5.6	5.77	6	6.12	6.26	6.42	6.5	6.92	6.84	1995-08-24	1
1	1	1	1	1	6.72		6.72	6.72	6.72	6.72	6.72	6.72	6.72	6.72	6.72	6.72	6.72	0.713901	0.943992		34936	N/A	5.5	5.6	5.7	5.9	6.01	6.13	6.3	6.38	6.8	6.72	1995-08-25	1
1	1	1	1	1	6.7		6.7	6.7	6.7	6.7	6.7	6.7	6.7	6.7	6.7	6.7	6.7	0.726955	0.958342		34939	N/A	5.48	5.56	5.66	5.85	5.97	6.1	6.26	6.34	6.77	6.7	1995-08-28	1
1	1	1	1	1	6.72		6.72	6.72	6.72	6.72	6.72	6.72	6.72	6.72	6.72	6.72	6.72	0.706148	0.934313		34940	N/A	5.5	5.61	5.71	5.93	6.03	6.15	6.29	6.36	6.79	6.72	1995-08-29	1
1	1	1	1	1	6.7		6.7	6.7	6.7	6.7	6.7	6.7	6.7	6.7	6.7	6.7	6.7	0.728435	0.960635		34941	N/A	5.46	5.55	5.66	5.88	5.98	6.1	6.25	6.33	6.77	6.7	1995-08-30	1
1	1	1	1	1	6.65		6.65	6.65	6.65	6.65	6.65	6.65	6.65	6.65	6.65	6.65	6.65	0.706862	0.931064		34942	N/A	5.45	5.53	5.65	5.85	5.95	6.07	6.21	6.28	6.72	6.65	1995-08-31	1
1	1	1	1	1	6.61		6.61	6.61	6.61	6.61	6.61	6.61	6.61	6.61	6.61	6.61	6.61	0.707736	0.921162		34943	N/A	5.45	5.52	5.6	5.78	5.89	6	6.14	6.22	6.67	6.61	1995-09-01	1
1	1	1	1	1	6.57		6.57	6.57	6.57	6.57	6.57	6.57	6.57	6.57	6.57	6.57	6.57	0.678521	0.870368		34947	N/A	5.49	5.55	5.6	5.77	5.85	5.96	6.09	6.18	6.63	6.57	1995-09-05	1
1	1	1	1	1	6.57		6.57	6.57	6.57	6.57	6.57	6.57	6.57	6.57	6.57	6.57	6.57	0.682728	0.8747		34948	N/A	5.48	5.55	5.6	5.76	5.84	5.95	6.1	6.17	6.63	6.57	1995-09-06	1
1	1	1	1	1	6.6		6.6	6.6	6.6	6.6	6.6	6.6	6.6	6.6	6.6	6.6	6.6	0.677214	0.873316		34949	N/A	5.5	5.57	5.65	5.8	5.89	6	6.14	6.21	6.66	6.6	1995-09-07	1
1	1	1	1	1	6.6		6.6	6.6	6.6	6.6	6.6	6.6	6.6	6.6	6.6	6.6	6.6	0.652854	0.852549		34950	N/A	5.52	5.58	5.67	5.85	5.95	6.04	6.17	6.24	6.66	6.6	1995-09-08	1
1	1	1	1	1	6.6		6.6	6.6	6.6	6.6	6.6	6.6	6.6	6.6	6.6	6.6	6.6	0.660344	0.861185		34953	N/A	5.5	5.58	5.67	5.83	5.93	6.05	6.15	6.24	6.67	6.6	1995-09-11	1
1	1	1	1	1	6.51		6.51	6.51	6.51	6.51	6.51	6.51	6.51	6.51	6.51	6.51	6.51	0.635216	0.822204		34954	N/A	5.47	5.54	5.61	5.77	5.84	5.96	6.09	6.16	6.6	6.51	1995-09-12	1
1	1	1	1	1	6.52		6.52	6.52	6.52	6.52	6.52	6.52	6.52	6.52	6.52	6.52	6.52	0.628967	0.821389		34955	N/A	5.47	5.54	5.63	5.8	5.88	5.99	6.12	6.18	6.63	6.52	1995-09-13	1
1	1	1	1	1	6.45		6.45	6.45	6.45	6.45	6.45	6.45	6.45	6.45	6.45	6.45	6.45	0.646149	0.829156		34956	N/A	5.44	5.48	5.51	5.68	5.76	5.87	6.01	6.08	6.56	6.45	1995-09-14	1
1	1	1	1	1	6.47		6.47	6.47	6.47	6.47	6.47	6.47	6.47	6.47	6.47	6.47	6.47	0.635774	0.820451		34957	N/A	5.46	5.51	5.55	5.71	5.8	5.91	6.05	6.11	6.58	6.47	1995-09-15	1
1	1	1	1	1	6.53		6.53	6.53	6.53	6.53	6.53	6.53	6.53	6.53	6.53	6.53	6.53	0.672654	0.88278		34960	N/A	5.41	5.47	5.56	5.77	5.86	5.97	6.11	6.17	6.64	6.53	1995-09-18	1
1	1	1	1	1	6.49		6.49	6.49	6.49	6.49	6.49	6.49	6.49	6.49	6.49	6.49	6.49	0.664126	0.872766		34961	N/A	5.36	5.45	5.54	5.75	5.83	5.94	6.08	6.14	6.61	6.49	1995-09-19	1
1	1	1	1	1	6.46		6.46	6.46	6.46	6.46	6.46	6.46	6.46	6.46	6.46	6.46	6.46	0.657523	0.863921		34962	N/A	5.34	5.43	5.52	5.73	5.81	5.92	6.05	6.1	6.57	6.46	1995-09-20	1
1	1	1	1	1	6.56		6.56	6.56	6.56	6.56	6.56	6.56	6.56	6.56	6.56	6.56	6.56	0.662434	0.874414		34963	N/A	5.4	5.53	5.62	5.83	5.91	6.03	6.15	6.21	6.66	6.56	1995-09-21	1
1	1	1	1	1	6.59		6.59	6.59	6.59	6.59	6.59	6.59	6.59	6.59	6.59	6.59	6.59	0.68463	0.91123		34964	N/A	5.35	5.52	5.63	5.85	5.93	6.06	6.19	6.25	6.7	6.59	1995-09-22	1
1	1	1	1	1	6.58		6.58	6.58	6.58	6.58	6.58	6.58	6.58	6.58	6.58	6.58	6.58	0.671261	0.899822		34967	N/A	5.33	5.51	5.65	5.89	5.95	6.08	6.2	6.26	6.7	6.58	1995-09-25	1
1	1	1	1	1	6.58		6.58	6.58	6.58	6.58	6.58	6.58	6.58	6.58	6.58	6.58	6.58	0.621655	0.827804		34968	N/A	5.45	5.63	5.71	5.88	5.98	6.11	6.21	6.28	6.71	6.58	1995-09-26	1
1	1	1	1	1	6.61		6.61	6.61	6.61	6.61	6.61	6.61	6.61	6.61	6.61	6.61	6.61	0.64874	0.864916		34969	N/A	5.42	5.6	5.7	5.92	6.01	6.08	6.25	6.3	6.76	6.61	1995-09-27	1
1	1	1	1	1	6.59		6.59	6.59	6.59	6.59	6.59	6.59	6.59	6.59	6.59	6.59	6.59	0.625736	0.833235		34970	N/A	5.44	5.61	5.73	5.92	6	6.1	6.22	6.28	6.71	6.59	1995-09-28	1
1	1	1	1	1	6.49		6.49	6.49	6.49	6.49	6.49	6.49	6.49	6.49	6.49	6.49	6.49	0.603128	0.796957		34971	N/A	5.4	5.57	5.65	5.83	5.91	6.01	6.11	6.17	6.6	6.49	1995-09-29	1
1	1	1	1	1	6.48		6.48	6.48	6.48	6.48	6.48	6.48	6.48	6.48	6.48	6.48	6.48	0.572149	0.73927		34974	N/A	5.53	5.64	5.65	5.82	5.89	5.98	6.1	6.15	6.61	6.48	1995-10-02	1
1	1	1	1	1	6.46		6.46	6.46	6.46	6.46	6.46	6.46	6.46	6.46	6.46	6.46	6.46	0.57372	0.741552		34975	N/A	5.51	5.61	5.63	5.8	5.87	5.96	6.07	6.13	6.57	6.46	1995-10-03	1
1	1	1	1	1	6.44		6.44	6.44	6.44	6.44	6.44	6.44	6.44	6.44	6.44	6.44	6.44	0.589082	0.758881		34976	N/A	5.47	5.57	5.6	5.75	5.82	5.91	6.04	6.12	6.54	6.44	1995-10-04	1
1	1	1	1	1	6.43		6.43	6.43	6.43	6.43	6.43	6.43	6.43	6.43	6.43	6.43	6.43	0.600045	0.765428		34977	N/A	5.44	5.57	5.59	5.72	5.8	5.88	6	6.06	6.53	6.43	1995-10-05	1
1	1	1	1	1	6.43		6.43	6.43	6.43	6.43	6.43	6.43	6.43	6.43	6.43	6.43	6.43	0.589838	0.751372		34978	N/A	5.47	5.59	5.59	5.73	5.81	5.89	6	6.06	6.51	6.43	1995-10-06	1
1	1	1	1	1	6.43		6.43	6.43	6.43	6.43	6.43	6.43	6.43	6.43	6.43	6.43	6.43	0.586624	0.749627		34982	N/A	5.47	5.57	5.61	5.74	5.81	5.91	6	6.07	6.51	6.43	1995-10-10	1
1	1	1	1	1	6.44		6.44	6.44	6.44	6.44	6.44	6.44	6.44	6.44	6.44	6.44	6.44	0.590116	0.756677		34983	N/A	5.47	5.57	5.61	5.75	5.82	5.91	6.02	6.09	6.5	6.44	1995-10-11	1
1	1	1	1	1	6.41		6.41	6.41	6.41	6.41	6.41	6.41	6.41	6.41	6.41	6.41	6.41	0.577935	0.738133		34984	N/A	5.46	5.57	5.61	5.72	5.8	5.88	5.99	6.07	6.48	6.41	1995-10-12	1
1	1	1	1	1	6.3		6.3	6.3	6.3	6.3	6.3	6.3	6.3	6.3	6.3	6.3	6.3	0.527602	0.66112		34985	N/A	5.45	5.56	5.58	5.67	5.72	5.8	5.88	5.97	6.37	6.3	1995-10-13	1
1	1	1	1	1	6.32		6.32	6.32	6.32	6.32	6.32	6.32	6.32	6.32	6.32	6.32	6.32	0.532695	0.662103		34988	N/A	5.49	5.58	5.59	5.67	5.73	5.8	5.89	5.97	6.38	6.32	1995-10-16	1
1	1	1	1	1	6.3		6.3	6.3	6.3	6.3	6.3	6.3	6.3	6.3	6.3	6.3	6.3	0.535427	0.674507		34989	N/A	5.43	5.55	5.57	5.65	5.71	5.8	5.89	5.97	6.36	6.3	1995-10-17	1
1	1	1	1	1	6.32		6.32	6.32	6.32	6.32	6.32	6.32	6.32	6.32	6.32	6.32	6.32	0.542729	0.691535		34990	N/A	5.41	5.55	5.58	5.67	5.74	5.83	5.92	5.99	6.38	6.32	1995-10-18	1
1	1	1	1	1	6.31		6.31	6.31	6.31	6.31	6.31	6.31	6.31	6.31	6.31	6.31	6.31	0.536105	0.682657		34991	N/A	5.41	5.55	5.58	5.67	5.73	5.83	5.92	5.98	6.37	6.31	1995-10-19	1
1	1	1	1	1	6.35		6.35	6.35	6.35	6.35	6.35	6.35	6.35	6.35	6.35	6.35	6.35	0.533539	0.690594		34992	N/A	5.43	5.57	5.62	5.72	5.79	5.9	5.99	6.04	6.42	6.35	1995-10-20	1
1	1	1	1	1	6.38		6.38	6.38	6.38	6.38	6.38	6.38	6.38	6.38	6.38	6.38	6.38	0.550636	0.717412		34995	N/A	5.38	5.57	5.65	5.76	5.82	5.92	6.01	6.07	6.44	6.38	1995-10-23	1
1	1	1	1	1	6.33		6.33	6.33	6.33	6.33	6.33	6.33	6.33	6.33	6.33	6.33	6.33	0.543407	0.700114		34996	N/A	5.38	5.56	5.6	5.68	5.76	5.85	5.95	6.02	6.37	6.33	1995-10-24	1
1	1	1	1	1	6.32		6.32	6.32	6.32	6.32	6.32	6.32	6.32	6.32	6.32	6.32	6.32	0.556736	0.706796		34997	N/A	5.39	5.55	5.56	5.64	5.72	5.8	5.9	6	6.37	6.32	1995-10-25	1
1	1	1	1	1	6.38		6.38	6.38	6.38	6.38	6.38	6.38	6.38	6.38	6.38	6.38	6.38	0.616139	0.788277		34998	N/A	5.38	5.5	5.52	5.61	5.72	5.81	5.93	6.06	6.44	6.38	1995-10-26	1
1	1	1	1	1	6.35		6.35	6.35	6.35	6.35	6.35	6.35	6.35	6.35	6.35	6.35	6.35	0.571402	0.732694		34999	N/A	5.41	5.53	5.56	5.64	5.73	5.83	5.95	6.05	6.4	6.35	1995-10-27	1
1	1	1	1	1	6.35		6.35	6.35	6.35	6.35	6.35	6.35	6.35	6.35	6.35	6.35	6.35	0.566721	0.719347		35002	N/A	5.47	5.55	5.55	5.62	5.72	5.82	5.94	6.04	6.41	6.35	1995-10-30	1
1	1	1	1	1	6.34		6.34	6.34	6.34	6.34	6.34	6.34	6.34	6.34	6.34	6.34	6.34	0.563052	0.710028		35003	N/A	5.48	5.55	5.55	5.61	5.7	5.81	5.92	6.03	6.4	6.34	1995-10-31	1
1	1	1	1	1	6.29		6.29	6.29	6.29	6.29	6.29	6.29	6.29	6.29	6.29	6.29	6.29	0.573284	0.718039		35004	N/A	5.48	5.49	5.46	5.52	5.62	5.74	5.86	5.98	6.36	6.29	1995-11-01	1
1	1	1	1	1	6.25		6.25	6.25	6.25	6.25	6.25	6.25	6.25	6.25	6.25	6.25	6.25	0.578258	0.715849		35005	N/A	5.47	5.46	5.41	5.46	5.56	5.68	5.8	5.92	6.31	6.25	1995-11-02	1
1	1	1	1	1	6.28		6.28	6.28	6.28	6.28	6.28	6.28	6.28	6.28	6.28	6.28	6.28	0.58643	0.724817		35006	N/A	5.47	5.49	5.43	5.49	5.58	5.7	5.82	5.94	6.33	6.28	1995-11-03	1
1	1	1	1	1	6.29		6.29	6.29	6.29	6.29	6.29	6.29	6.29	6.29	6.29	6.29	6.29	0.567627	0.702538		35009	N/A	5.52	5.53	5.46	5.51	5.62	5.73	5.84	5.96	6.34	6.29	1995-11-06	1
1	1	1	1	1	6.31		6.31	6.31	6.31	6.31	6.31	6.31	6.31	6.31	6.31	6.31	6.31	0.564173	0.704713		35010	N/A	5.53	5.54	5.48	5.54	5.65	5.77	5.88	5.99	6.37	6.31	1995-11-07	1
1	1	1	1	1	6.25		6.25	6.25	6.25	6.25	6.25	6.25	6.25	6.25	6.25	6.25	6.25	0.564149	0.696348		35011	N/A	5.52	5.49	5.41	5.47	5.58	5.69	5.8	5.92	6.3	6.25	1995-11-08	1
1	1	1	1	1	6.29		6.29	6.29	6.29	6.29	6.29	6.29	6.29	6.29	6.29	6.29	6.29	0.573609	0.707785		35012	N/A	5.55	5.53	5.43	5.49	5.59	5.72	5.85	5.97	6.35	6.29	1995-11-09	1
1	1	1	1	1	6.33		6.33	6.33	6.33	6.33	6.33	6.33	6.33	6.33	6.33	6.33	6.33	0.579137	0.718652		35013	N/A	5.58	5.54	5.47	5.52	5.64	5.76	5.89	6	6.39	6.33	1995-11-10	1
1	1	1	1	1	6.28		6.28	6.28	6.28	6.28	6.28	6.28	6.28	6.28	6.28	6.28	6.28	0.553107	0.681792		35016	N/A	5.59	5.56	5.44	5.49	5.61	5.72	5.85	5.98	6.34	6.28	1995-11-13	1
1	1	1	1	1	6.3		6.3	6.3	6.3	6.3	6.3	6.3	6.3	6.3	6.3	6.3	6.3	0.587615	0.723422		35017	N/A	5.55	5.52	5.43	5.47	5.58	5.71	5.85	5.97	6.36	6.3	1995-11-14	1
1	1	1	1	1	6.3		6.3	6.3	6.3	6.3	6.3	6.3	6.3	6.3	6.3	6.3	6.3	0.554043	0.69165		35018	N/A	5.56	5.55	5.47	5.53	5.63	5.77	5.9	6	6.37	6.3	1995-11-15	1
1	1	1	1	1	6.24		6.24	6.24	6.24	6.24	6.24	6.24	6.24	6.24	6.24	6.24	6.24	0.55542	0.685099		35019	N/A	5.52	5.5	5.42	5.46	5.56	5.68	5.83	5.93	6.32	6.24	1995-11-16	1
1	1	1	1	1	6.23		6.23	6.23	6.23	6.23	6.23	6.23	6.23	6.23	6.23	6.23	6.23	0.558513	0.685244		35020	N/A	5.51	5.49	5.4	5.46	5.54	5.66	5.81	5.92	6.33	6.23	1995-11-17	1
1	1	1	1	1	6.25		6.25	6.25	6.25	6.25	6.25	6.25	6.25	6.25	6.25	6.25	6.25	0.575666	0.704996		35023	N/A	5.5	5.48	5.41	5.46	5.53	5.66	5.82	5.93	6.33	6.25	1995-11-20	1
1	1	1	1	1	6.27		6.27	6.27	6.27	6.27	6.27	6.27	6.27	6.27	6.27	6.27	6.27	0.569864	0.698026		35024	N/A	5.52	5.5	5.45	5.49	5.56	5.7	5.85	5.92	6.36	6.27	1995-11-21	1
1	1	1	1	1	6.28		6.28	6.28	6.28	6.28	6.28	6.28	6.28	6.28	6.28	6.28	6.28	0.568483	0.697968		35025	N/A	5.52	5.51	5.46	5.51	5.58	5.72	5.85	5.93	6.37	6.28	1995-11-22	1
1	1	1	1	1	6.25		6.25	6.25	6.25	6.25	6.25	6.25	6.25	6.25	6.25	6.25	6.25	0.564897	0.697968		35027	N/A	5.48	5.48	5.43	5.49	5.56	5.7	5.84	5.91	6.36	6.25	1995-11-24	1
1	1	1	1	1	6.23		6.23	6.23	6.23	6.23	6.23	6.23	6.23	6.23	6.23	6.23	6.23	0.560414	0.684953		35030	N/A	5.5	5.49	5.41	5.46	5.53	5.67	5.81	5.88	6.31	6.23	1995-11-27	1
1	1	1	1	1	6.24		6.24	6.24	6.24	6.24	6.24	6.24	6.24	6.24	6.24	6.24	6.24	0.558374	0.676254		35031	N/A	5.53	5.52	5.44	5.45	5.54	5.67	5.8	5.88	6.31	6.24	1995-11-28	1
1	1	1	1	1	6.22		6.22	6.22	6.22	6.22	6.22	6.22	6.22	6.22	6.22	6.22	6.22	0.569434	0.682832		35032	N/A	5.5	5.49	5.42	5.42	5.49	5.6	5.8	5.85	6.29	6.22	1995-11-29	1
1	1	1	1	1	6.14		6.14	6.14	6.14	6.14	6.14	6.14	6.14	6.14	6.14	6.14	6.14	0.554273	0.650354		35033	N/A	5.48	5.46	5.36	5.36	5.41	5.53	5.68	5.76	6.2	6.14	1995-11-30	1
1	1	1	1	1	6.1		6.1	6.1	6.1	6.1	6.1	6.1	6.1	6.1	6.1	6.1	6.1	0.551115	0.641779		35034	N/A	5.45	5.44	5.33	5.32	5.37	5.49	5.63	5.71	6.16	6.1	1995-12-01	1
1	1	1	1	1	6.01		6.01	6.01	6.01	6.01	6.01	6.01	6.01	6.01	6.01	6.01	6.01	0.507247	0.576645		35037	N/A	5.46	5.43	5.32	5.27	5.33	5.43	5.54	5.63	6.07	6.01	1995-12-04	1
1	1	1	1	1	6.04		6.04	6.04	6.04	6.04	6.04	6.04	6.04	6.04	6.04	6.04	6.04	0.521318	0.59597		35038	N/A	5.47	5.42	5.33	5.29	5.34	5.45	5.57	5.65	6.09	6.04	1995-12-05	1
1	1	1	1	1	6.03		6.03	6.03	6.03	6.03	6.03	6.03	6.03	6.03	6.03	6.03	6.03	0.496167	0.577425		35039	N/A	5.48	5.41	5.34	5.32	5.38	5.49	5.59	5.67	6.09	6.03	1995-12-06	1
1	1	1	1	1	6.07		6.07	6.07	6.07	6.07	6.07	6.07	6.07	6.07	6.07	6.07	6.07	0.497375	0.585713		35040	N/A	5.5	5.43	5.35	5.39	5.42	5.54	5.65	5.72	6.13	6.07	1995-12-07	1
1	1	1	1	1	6.06		6.06	6.06	6.06	6.06	6.06	6.06	6.06	6.06	6.06	6.06	6.06	0.473881	0.562761		35041	N/A	5.5	5.45	5.39	5.39	5.45	5.56	5.67	5.73	6.12	6.06	1995-12-08	1
1	1	1	1	1	6.04		6.04	6.04	6.04	6.04	6.04	6.04	6.04	6.04	6.04	6.04	6.04	0.481928	0.571297		35044	N/A	5.45	5.43	5.35	5.38	5.41	5.53	5.65	5.71	6.11	6.04	1995-12-11	1
1	1	1	1	1	6.05		6.05	6.05	6.05	6.05	6.05	6.05	6.05	6.05	6.05	6.05	6.05	0.489675	0.586208		35045	N/A	5.41	5.42	5.36	5.39	5.42	5.55	5.65	5.72	6.11	6.05	1995-12-12	1
1	1	1	1	1	6.07		6.07	6.07	6.07	6.07	6.07	6.07	6.07	6.07	6.07	6.07	6.07	0.496213	0.597411		35046	N/A	5.42	5.43	5.37	5.39	5.45	5.56	5.66	5.74	6.12	6.07	1995-12-13	1
1	1	1	1	1	6.08		6.08	6.08	6.08	6.08	6.08	6.08	6.08	6.08	6.08	6.08	6.08	0.514004	0.615484		35047	N/A	5.42	5.42	5.35	5.38	5.42	5.55	5.66	5.74	6.14	6.08	1995-12-14	1
1	1	1	1	1	6.09		6.09	6.09	6.09	6.09	6.09	6.09	6.09	6.09	6.09	6.09	6.09	0.54476	0.664274		35048	N/A	5.35	5.36	5.32	5.36	5.41	5.55	5.66	5.75	6.15	6.09	1995-12-15	1
1	1	1	1	1	6.2		6.2	6.2	6.2	6.2	6.2	6.2	6.2	6.2	6.2	6.2	6.2	0.584528	0.732079		35051	N/A	5.32	5.4	5.38	5.43	5.51	5.66	5.77	5.85	6.26	6.2	1995-12-18	1
1	1	1	1	1	6.14		6.14	6.14	6.14	6.14	6.14	6.14	6.14	6.14	6.14	6.14	6.14	0.598126	0.754573		35052	N/A	5.24	5.31	5.28	5.36	5.45	5.58	5.71	5.81	6.21	6.14	1995-12-19	1
1	1	1	1	1	6.11		6.11	6.11	6.11	6.11	6.11	6.11	6.11	6.11	6.11	6.11	6.11	0.604431	0.762627		35053	N/A	5.15	5.29	5.27	5.33	5.42	5.55	5.67	5.76	6.18	6.11	1995-12-20	1
1	1	1	1	1	6.11		6.11	6.11	6.11	6.11	6.11	6.11	6.11	6.11	6.11	6.11	6.11	0.617458	0.782368		35054	N/A	5.05	5.3	5.29	5.33	5.41	5.53	5.68	5.77	6.19	6.11	1995-12-21	1
1	1	1	1	1	6.06		6.06	6.06	6.06	6.06	6.06	6.06	6.06	6.06	6.06	6.06	6.06	0.604701	0.763269		35055	N/A	5.04	5.27	5.26	5.28	5.37	5.5	5.62	5.71	6.12	6.06	1995-12-22	1
1	1	1	1	1	6.04		6.04	6.04	6.04	6.04	6.04	6.04	6.04	6.04	6.04	6.04	6.04	0.595124	0.746967		35059	N/A	5.05	5.26	5.26	5.27	5.34	5.48	5.62	5.69	6.1	6.04	1995-12-26	1
1	1	1	1	1	6.01		6.01	6.01	6.01	6.01	6.01	6.01	6.01	6.01	6.01	6.01	6.01	0.593112	0.743788		35060	N/A	5.04	5.23	5.23	5.23	5.31	5.46	5.58	5.66	6.07	6.01	1995-12-27	1
1	1	1	1	1	5.98		5.98	5.98	5.98	5.98	5.98	5.98	5.98	5.98	5.98	5.98	5.98	0.611585	0.775281		35061	N/A	4.98	5.11	5.18	5.2	5.27	5.43	5.56	5.63	6.04	5.98	1995-12-28	1
1	1	1	1	1	5.96		5.96	5.96	5.96	5.96	5.96	5.96	5.96	5.96	5.96	5.96	5.96	0.586887	0.718401		35062	N/A	5.1	5.17	5.18	5.18	5.25	5.38	5.49	5.58	6.01	5.96	1995-12-29	1
1	1	1	1	1	5.97		5.97	5.97	5.97	5.97	5.97	5.97	5.97	5.97	5.97	5.97	5.97	0.569529	0.68926		35066	N/A	5.2	5.25	5.17	5.18	5.26	5.39	5.51	5.6	6.03	5.97	1996-01-02	1
1	1	1	1	1	5.96		5.96	5.96	5.96	5.96	5.96	5.96	5.96	5.96	5.96	5.96	5.96	0.578368	0.691274		35067	N/A	5.2	5.22	5.16	5.17	5.21	5.36	5.49	5.58	6.01	5.96	1996-01-03	1
1	1	1	1	1	6.03		6.03	6.03	6.03	6.03	6.03	6.03	6.03	6.03	6.03	6.03	6.03	0.615748	0.747101		35068	N/A	5.19	5.23	5.19	5.17	5.26	5.39	5.55	5.65	6.08	6.03	1996-01-04	1
1	1	1	1	1	6.05		6.05	6.05	6.05	6.05	6.05	6.05	6.05	6.05	6.05	6.05	6.05	0.618642	0.760342		35069	N/A	5.19	5.22	5.19	5.2	5.29	5.42	5.59	5.69	6.11	6.05	1996-01-05	1
1	1	1	1	1	6.04		6.04	6.04	6.04	6.04	6.04	6.04	6.04	6.04	6.04	6.04	6.04	0.617436	0.753671		35072	N/A	5.18	5.22	5.19	5.2	5.27	5.41	5.56	5.68	6.1	6.04	1996-01-08	1
1	1	1	1	1	6.06		6.06	6.06	6.06	6.06	6.06	6.06	6.06	6.06	6.06	6.06	6.06	0.640213	0.787198		35073	N/A	5.18	5.2	5.16	5.18	5.27	5.41	5.58	5.7	6.12	6.06	1996-01-09	1
1	1	1	1	1	6.16		6.16	6.16	6.16	6.16	6.16	6.16	6.16	6.16	6.16	6.16	6.16	0.687909	0.860965		35074	N/A	5.19	5.19	5.19	5.22	5.33	5.5	5.67	5.8	6.23	6.16	1996-01-10	1
1	1	1	1	1	6.16		6.16	6.16	6.16	6.16	6.16	6.16	6.16	6.16	6.16	6.16	6.16	0.697535	0.867802		35075	N/A	5.19	5.19	5.16	5.22	5.31	5.47	5.67	5.78	6.22	6.16	1996-01-11	1
1	1	1	1	1	6.16		6.16	6.16	6.16	6.16	6.16	6.16	6.16	6.16	6.16	6.16	6.16	0.724318	0.88784		35076	N/A	5.18	5.18	5.14	5.17	5.26	5.4	5.64	5.75	6.22	6.16	1996-01-12	1
1	1	1	1	1	6.09		6.09	6.09	6.09	6.09	6.09	6.09	6.09	6.09	6.09	6.09	6.09	0.726824	0.89483		35080	N/A	5.14	5.08	5.06	5.08	5.19	5.37	5.55	5.66	6.14	6.09	1996-01-16	1
1	1	1	1	1	6		6	6	6	6	6	6	6	6	6	6	6	0.686255	0.83261		35081	N/A	5.14	5.05	5.04	5.05	5.14	5.29	5.46	5.58	6.05	6	1996-01-17	1
1	1	1	1	1	5.98		5.98	5.98	5.98	5.98	5.98	5.98	5.98	5.98	5.98	5.98	5.98	0.700902	0.843836		35082	N/A	5.11	5.02	5.01	5.01	5.09	5.25	5.42	5.53	6.03	5.98	1996-01-18	1
1	1	1	1	1	5.97		5.97	5.97	5.97	5.97	5.97	5.97	5.97	5.97	5.97	5.97	5.97	0.680708	0.821109		35083	N/A	5.1	5.06	5.02	5.03	5.1	5.27	5.43	5.54	6.02	5.97	1996-01-19	1
1	1	1	1	1	6.04		6.04	6.04	6.04	6.04	6.04	6.04	6.04	6.04	6.04	6.04	6.04	0.694229	0.845648		35086	N/A	5.14	5.1	5.06	5.08	5.17	5.34	5.5	5.61	6.09	6.04	1996-01-22	1
1	1	1	1	1	6.09		6.09	6.09	6.09	6.09	6.09	6.09	6.09	6.09	6.09	6.09	6.09	0.725365	0.890191		35087	N/A	5.12	5.11	5.06	5.09	5.18	5.37	5.55	5.66	6.14	6.09	1996-01-23	1
1	1	1	1	1	6.02		6.02	6.02	6.02	6.02	6.02	6.02	6.02	6.02	6.02	6.02	6.02	0.689598	0.841309		35088	N/A	5.12	5.1	5.03	5.07	5.16	5.3	5.5	5.62	6.08	6.02	1996-01-24	1
1	1	1	1	1	6.11		6.11	6.11	6.11	6.11	6.11	6.11	6.11	6.11	6.11	6.11	6.11	0.724795	0.90141		35089	N/A	5.12	5.12	5.06	5.11	5.23	5.41	5.58	5.7	6.16	6.11	1996-01-25	1
1	1	1	1	1	6.04		6.04	6.04	6.04	6.04	6.04	6.04	6.04	6.04	6.04	6.04	6.04	0.695904	0.859279		35090	N/A	5.11	5.11	5.02	5.08	5.18	5.34	5.54	5.65	6.1	6.04	1996-01-26	1
1	1	1	1	1	6.09		6.09	6.09	6.09	6.09	6.09	6.09	6.09	6.09	6.09	6.09	6.09	0.712563	0.877382		35093	N/A	5.17	5.12	5.05	5.1	5.21	5.37	5.56	5.69	6.14	6.09	1996-01-29	1
1	1	1	1	1	6.04		6.04	6.04	6.04	6.04	6.04	6.04	6.04	6.04	6.04	6.04	6.04	0.724908	0.889281		35094	N/A	5.14	5.05	4.98	5.02	5.13	5.3	5.51	5.63	6.08	6.04	1996-01-30	1
1	1	1	1	1	6.03		6.03	6.03	6.03	6.03	6.03	6.03	6.03	6.03	6.03	6.03	6.03	0.776449	0.956128		35095	N/A	5.05	4.97	4.9	4.93	5.06	5.25	5.46	5.6	6.07	6.03	1996-01-31	1
1	1	1	1	1	6.08		6.08	6.08	6.08	6.08	6.08	6.08	6.08	6.08	6.08	6.08	6.08	0.821141	1.00747		35096	N/A	5.03	4.98	4.88	4.93	5.05	5.24	5.47	5.63	6.11	6.08	1996-02-01	1
1	1	1	1	1	6.15		6.15	6.15	6.15	6.15	6.15	6.15	6.15	6.15	6.15	6.15	6.15	0.894336	1.10111		35097	N/A	4.99	4.94	4.85	4.9	5.04	5.24	5.49	5.66	6.16	6.15	1996-02-02	1
1	1	1	1	1	6.15		6.15	6.15	6.15	6.15	6.15	6.15	6.15	6.15	6.15	6.15	6.15	0.861574	1.07185		35100	N/A	5	4.98	4.88	4.95	5.09	5.3	5.54	5.7	6.17	6.15	1996-02-05	1
1	1	1	1	1	6.14		6.14	6.14	6.14	6.14	6.14	6.14	6.14	6.14	6.14	6.14	6.14	0.873056	1.07624		35101	N/A	4.98	4.97	4.87	4.93	5.03	5.28	5.5	5.68	6.15	6.14	1996-02-06	1
1	1	1	1	1	6.15		6.15	6.15	6.15	6.15	6.15	6.15	6.15	6.15	6.15	6.15	6.15	0.892392	1.10282		35102	N/A	4.94	4.95	4.86	4.92	5.03	5.27	5.51	5.66	6.17	6.15	1996-02-07	1
1	1	1	1	1	6.09		6.09	6.09	6.09	6.09	6.09	6.09	6.09	6.09	6.09	6.09	6.09	0.855974	1.06706		35103	N/A	4.92	4.93	4.84	4.9	5.01	5.27	5.51	5.66	6.17	6.09	1996-02-08	1
1	1	1	1	1	6.11		6.11	6.11	6.11	6.11	6.11	6.11	6.11	6.11	6.11	6.11	6.11	0.888876	1.1031		35104	N/A	4.93	4.91	4.82	4.85	4.98	5.25	5.49	5.66	6.17	6.11	1996-02-09	1
1	1	1	1	1	6.05		6.05	6.05	6.05	6.05	6.05	6.05	6.05	6.05	6.05	6.05	6.05	0.864833	1.06092		35107	N/A	4.93	4.9	4.8	4.83	4.94	5.17	5.42	5.61	6.1	6.05	1996-02-12	1
1	1	1	1	1	6.02		6.02	6.02	6.02	6.02	6.02	6.02	6.02	6.02	6.02	6.02	6.02	0.862365	1.05214		35108	N/A	4.93	4.86	4.79	4.8	4.89	5.14	5.39	5.58	6.08	6.02	1996-02-13	1
1	1	1	1	1	6.07		6.07	6.07	6.07	6.07	6.07	6.07	6.07	6.07	6.07	6.07	6.07	0.883819	1.079		35109	N/A	4.94	4.9	4.8	4.82	4.91	5.17	5.43	5.62	6.13	6.07	1996-02-14	1
1	1	1	1	1	6.16		6.16	6.16	6.16	6.16	6.16	6.16	6.16	6.16	6.16	6.16	6.16	0.927435	1.13857		35110	N/A	4.92	4.92	4.84	4.87	4.95	5.23	5.5	5.7	6.22	6.16	1996-02-15	1
1	1	1	1	1	6.23		6.23	6.23	6.23	6.23	6.23	6.23	6.23	6.23	6.23	6.23	6.23	0.966836	1.20545		35111	N/A	4.89	4.9	4.84	4.9	5.01	5.29	5.58	5.76	6.27	6.23	1996-02-16	1
1	1	1	1	1	6.39		6.39	6.39	6.39	6.39	6.39	6.39	6.39	6.39	6.39	6.39	6.39	0.914201	1.16654		35115	N/A	4.99	5.09	5.09	5.18	5.3	5.53	5.83	6.01	6.45	6.39	1996-02-20	1
1	1	1	1	1	6.39		6.39	6.39	6.39	6.39	6.39	6.39	6.39	6.39	6.39	6.39	6.39	0.933756	1.20025		35116	N/A	4.96	5.03	5.05	5.16	5.3	5.56	5.81	5.98	6.47	6.39	1996-02-21	1
1	1	1	1	1	6.36		6.36	6.36	6.36	6.36	6.36	6.36	6.36	6.36	6.36	6.36	6.36	0.951525	1.21094		35117	N/A	4.95	4.98	4.99	5.11	5.23	5.47	5.76	5.92	6.43	6.36	1996-02-22	1
1	1	1	1	1	6.42		6.42	6.42	6.42	6.42	6.42	6.42	6.42	6.42	6.42	6.42	6.42	0.972784	1.24672		35118	N/A	4.97	4.99	5.02	5.13	5.29	5.53	5.82	5.97	6.5	6.42	1996-02-23	1
1	1	1	1	1	6.45		6.45	6.45	6.45	6.45	6.45	6.45	6.45	6.45	6.45	6.45	6.45	0.977143	1.25656		35121	N/A	4.98	4.98	5.05	5.18	5.33	5.56	5.85	6.01	6.54	6.45	1996-02-26	1
1	1	1	1	1	6.47		6.47	6.47	6.47	6.47	6.47	6.47	6.47	6.47	6.47	6.47	6.47	0.944024	1.22251		35122	N/A	5.01	5.02	5.12	5.28	5.41	5.63	5.9	6.06	6.56	6.47	1996-02-27	1
1	1	1	1	1	6.48		6.48	6.48	6.48	6.48	6.48	6.48	6.48	6.48	6.48	6.48	6.48	0.894747	1.17438		35123	N/A	5.01	5.05	5.22	5.43	5.51	5.73	5.97	6.11	6.58	6.48	1996-02-28	1
1	1	1	1	1	6.48		6.48	6.48	6.48	6.48	6.48	6.48	6.48	6.48	6.48	6.48	6.48	0.884215	1.16796		35124	N/A	5.02	5.05	5.23	5.44	5.56	5.73	5.99	6.13	6.57	6.48	1996-02-29	1
1	1	1	1	1	6.38		6.38	6.38	6.38	6.38	6.38	6.38	6.38	6.38	6.38	6.38	6.38	0.904805	1.18356		35125	N/A	4.98	4.94	5.07	5.26	5.4	5.6	5.86	5.99	6.48	6.38	1996-03-01	1
1	1	1	1	1	6.34		6.34	6.34	6.34	6.34	6.34	6.34	6.34	6.34	6.34	6.34	6.34	0.895555	1.1499		35128	N/A	5.02	4.98	5.02	5.21	5.32	5.52	5.78	5.92	6.43	6.34	1996-03-04	1
1	1	1	1	1	6.39		6.39	6.39	6.39	6.39	6.39	6.39	6.39	6.39	6.39	6.39	6.39	0.897243	1.16239		35129	N/A	5.02	5.01	5.07	5.28	5.4	5.6	5.84	5.96	6.48	6.39	1996-03-05	1
1	1	1	1	1	6.44		6.44	6.44	6.44	6.44	6.44	6.44	6.44	6.44	6.44	6.44	6.44	0.890562	1.16642		35130	N/A	5.03	5.05	5.13	5.36	5.48	5.68	5.93	6.05	6.54	6.44	1996-03-06	1
1	1	1	1	1	6.46		6.46	6.46	6.46	6.46	6.46	6.46	6.46	6.46	6.46	6.46	6.46	0.889862	1.17225		35131	N/A	5.03	5.06	5.14	5.4	5.53	5.71	5.96	6.07	6.56	6.46	1996-03-07	1
1	1	1	1	1	6.7		6.7	6.7	6.7	6.7	6.7	6.7	6.7	6.7	6.7	6.7	6.7	0.911447	1.24604		35132	N/A	5.01	5.2	5.39	5.73	5.88	6.05	6.28	6.41	6.84	6.7	1996-03-08	1
1	1	1	1	1	6.63		6.63	6.63	6.63	6.63	6.63	6.63	6.63	6.63	6.63	6.63	6.63	0.859799	1.17329		35135	N/A	5.09	5.18	5.38	5.71	5.86	6	6.24	6.33	6.76	6.63	1996-03-11	1
1	1	1	1	1	6.66		6.66	6.66	6.66	6.66	6.66	6.66	6.66	6.66	6.66	6.66	6.66	0.86055	1.18006		35136	N/A	5.09	5.19	5.41	5.78	5.92	6.04	6.28	6.36	6.79	6.66	1996-03-12	1
1	1	1	1	1	6.68		6.68	6.68	6.68	6.68	6.68	6.68	6.68	6.68	6.68	6.68	6.68	0.890914	1.212		35137	N/A	5.09	5.18	5.39	5.73	5.86	6.03	6.28	6.35	6.83	6.68	1996-03-13	1
1	1	1	1	1	6.68		6.68	6.68	6.68	6.68	6.68	6.68	6.68	6.68	6.68	6.68	6.68	0.896392	1.21866		35138	N/A	5.11	5.16	5.38	5.7	5.84	6.03	6.28	6.36	6.83	6.68	1996-03-14	1
1	1	1	1	1	6.75		6.75	6.75	6.75	6.75	6.75	6.75	6.75	6.75	6.75	6.75	6.75	0.86731	1.19868		35139	N/A	5.14	5.24	5.51	5.87	6.01	6.19	6.4	6.46	6.9	6.75	1996-03-15	1
1	1	1	1	1	6.71		6.71	6.71	6.71	6.71	6.71	6.71	6.71	6.71	6.71	6.71	6.71	0.828251	1.14522		35142	N/A	5.17	5.27	5.51	5.89	6.02	6.16	6.38	6.43	6.86	6.71	1996-03-18	1
1	1	1	1	1	6.7		6.7	6.7	6.7	6.7	6.7	6.7	6.7	6.7	6.7	6.7	6.7	0.832734	1.14796		35143	N/A	5.19	5.26	5.47	5.85	5.99	6.15	6.35	6.41	6.86	6.7	1996-03-19	1
1	1	1	1	1	6.65		6.65	6.65	6.65	6.65	6.65	6.65	6.65	6.65	6.65	6.65	6.65	0.84491	1.14845		35144	N/A	5.16	5.22	5.41	5.76	5.86	6.05	6.26	6.34	6.81	6.65	1996-03-20	1
1	1	1	1	1	6.62		6.62	6.62	6.62	6.62	6.62	6.62	6.62	6.62	6.62	6.62	6.62	0.852504	1.15663		35145	N/A	5.07	5.21	5.4	5.72	5.82	6.01	6.23	6.28	6.78	6.62	1996-03-21	1
1	1	1	1	1	6.65		6.65	6.65	6.65	6.65	6.65	6.65	6.65	6.65	6.65	6.65	6.65	0.857936	1.16731		35146	N/A	5.1	5.22	5.41	5.74	5.85	6.05	6.26	6.32	6.8	6.65	1996-03-22	1
1	1	1	1	1	6.58		6.58	6.58	6.58	6.58	6.58	6.58	6.58	6.58	6.58	6.58	6.58	0.828619	1.12703		35149	N/A	5.13	5.16	5.38	5.69	5.81	6	6.2	6.26	6.74	6.58	1996-03-25	1
1	1	1	1	1	6.59		6.59	6.59	6.59	6.59	6.59	6.59	6.59	6.59	6.59	6.59	6.59	0.829945	1.12612		35150	N/A	5.13	5.18	5.38	5.72	5.82	6	6.19	6.25	6.73	6.59	1996-03-26	1
1	1	1	1	1	6.68		6.68	6.68	6.68	6.68	6.68	6.68	6.68	6.68	6.68	6.68	6.68	0.849155	1.16362		35151	N/A	5.17	5.19	5.45	5.81	5.93	6.12	6.3	6.34	6.84	6.68	1996-03-27	1
1	1	1	1	1	6.73		6.73	6.73	6.73	6.73	6.73	6.73	6.73	6.73	6.73	6.73	6.73	0.852211	1.1753		35152	N/A	5.19	5.23	5.48	5.88	5.99	6.2	6.38	6.41	6.9	6.73	1996-03-28	1
1	1	1	1	1	6.67		6.67	6.67	6.67	6.67	6.67	6.67	6.67	6.67	6.67	6.67	6.67	0.856441	1.17427		35153	N/A	5.13	5.2	5.41	5.79	5.91	6.1	6.3	6.34	6.83	6.67	1996-03-29	1
1	1	1	1	1	6.66		6.66	6.66	6.66	6.66	6.66	6.66	6.66	6.66	6.66	6.66	6.66	0.830712	1.13234		35156	N/A	5.2	5.26	5.41	5.79	5.91	6.09	6.28	6.31	6.82	6.66	1996-04-01	1
1	1	1	1	1	6.62		6.62	6.62	6.62	6.62	6.62	6.62	6.62	6.62	6.62	6.62	6.62	0.821551	1.11133		35157	N/A	5.16	5.25	5.44	5.74	5.86	6.02	6.23	6.25	6.77	6.62	1996-04-02	1
1	1	1	1	1	6.63		6.63	6.63	6.63	6.63	6.63	6.63	6.63	6.63	6.63	6.63	6.63	0.818602	1.11385		35158	N/A	5.15	5.25	5.46	5.77	5.89	6.06	6.26	6.27	6.8	6.63	1996-04-03	1
1	1	1	1	1	6.66		6.66	6.66	6.66	6.66	6.66	6.66	6.66	6.66	6.66	6.66	6.66	0.826878	1.13771		35159	N/A	5.11	5.25	5.48	5.83	5.95	6.12	6.32	6.33	6.83	6.66	1996-04-04	1
1	1	1	1	1	6.83		6.83	6.83	6.83	6.83	6.83	6.83	6.83	6.83	6.83	6.83	6.83	0.836416	1.18075		35160	N/A	5.15	5.36	5.63	6.09	6.22	6.4	6.57	6.57	7.01	6.83	1996-04-05	1
1	1	1	1	1	6.88		6.88	6.88	6.88	6.88	6.88	6.88	6.88	6.88	6.88	6.88	6.88	0.850144	1.20295		35163	N/A	5.16	5.39	5.67	6.11	6.27	6.46	6.62	6.63	7.07	6.88	1996-04-08	1
1	1	1	1	1	6.84		6.84	6.84	6.84	6.84	6.84	6.84	6.84	6.84	6.84	6.84	6.84	0.868572	1.22344		35164	N/A	5.1	5.32	5.6	6.06	6.21	6.37	6.56	6.56	7.04	6.84	1996-04-09	1
1	1	1	1	1	6.91		6.91	6.91	6.91	6.91	6.91	6.91	6.91	6.91	6.91	6.91	6.91	0.906572	1.2789		35165	N/A	5.08	5.31	5.64	6.1	6.24	6.44	6.63	6.63	7.1	6.91	1996-04-10	1
1	1	1	1	1	6.95		6.95	6.95	6.95	6.95	6.95	6.95	6.95	6.95	6.95	6.95	6.95	0.919753	1.30635		35166	N/A	5.08	5.32	5.65	6.12	6.33	6.5	6.68	6.68	7.15	6.95	1996-04-11	1
1	1	1	1	1	6.81		6.81	6.81	6.81	6.81	6.81	6.81	6.81	6.81	6.81	6.81	6.81	0.888211	1.24333		35167	N/A	5.07	5.28	5.53	5.96	6.12	6.31	6.49	6.52	7	6.81	1996-04-12	1
1	1	1	1	1	6.79		6.79	6.79	6.79	6.79	6.79	6.79	6.79	6.79	6.79	6.79	6.79	0.92082	1.2877		35170	N/A	4.97	5.21	5.47	5.93	6.07	6.27	6.46	6.47	6.98	6.79	1996-04-15	1
1	1	1	1	1	6.78		6.78	6.78	6.78	6.78	6.78	6.78	6.78	6.78	6.78	6.78	6.78	0.917031	1.28536		35171	N/A	4.95	5.21	5.48	5.91	6.06	6.28	6.46	6.48	6.95	6.78	1996-04-16	1
1	1	1	1	1	6.81		6.81	6.81	6.81	6.81	6.81	6.81	6.81	6.81	6.81	6.81	6.81	0.913221	1.28439		35172	N/A	4.96	5.24	5.53	5.96	6.12	6.33	6.49	6.52	6.99	6.81	1996-04-17	1
1	1	1	1	1	6.84		6.84	6.84	6.84	6.84	6.84	6.84	6.84	6.84	6.84	6.84	6.84	0.90871	1.28583		35173	N/A	4.98	5.26	5.56	6.02	6.18	6.39	6.56	6.58	7.02	6.84	1996-04-18	1
1	1	1	1	1	6.8		6.8	6.8	6.8	6.8	6.8	6.8	6.8	6.8	6.8	6.8	6.8	0.903825	1.26887		35174	N/A	5.01	5.24	5.5	5.95	6.1	6.32	6.48	6.53	7	6.8	1996-04-19	1
1	1	1	1	1	6.75		6.75	6.75	6.75	6.75	6.75	6.75	6.75	6.75	6.75	6.75	6.75	0.868871	1.21641		35177	N/A	5.09	5.22	5.48	5.92	6.06	6.28	6.44	6.48	6.95	6.75	1996-04-22	1
1	1	1	1	1	6.78		6.78	6.78	6.78	6.78	6.78	6.78	6.78	6.78	6.78	6.78	6.78	0.880108	1.23591		35178	N/A	5.1	5.23	5.48	5.93	6.1	6.31	6.47	6.52	6.97	6.78	1996-04-23	1
1	1	1	1	1	6.81		6.81	6.81	6.81	6.81	6.81	6.81	6.81	6.81	6.81	6.81	6.81	0.883577	1.24233		35179	N/A	5.13	5.24	5.51	5.95	6.13	6.34	6.51	6.57	7.01	6.81	1996-04-24	1
1	1	1	1	1	6.81		6.81	6.81	6.81	6.81	6.81	6.81	6.81	6.81	6.81	6.81	6.81	0.880279	1.23558		35180	N/A	5.09	5.24	5.57	5.99	6.15	6.31	6.49	6.56	7.01	6.81	1996-04-25	1
1	1	1	1	1	6.79		6.79	6.79	6.79	6.79	6.79	6.79	6.79	6.79	6.79	6.79	6.79	0.878966	1.22886		35181	N/A	5.11	5.23	5.55	5.92	6.08	6.29	6.47	6.54	6.96	6.79	1996-04-26	1
1	1	1	1	1	6.83		6.83	6.83	6.83	6.83	6.83	6.83	6.83	6.83	6.83	6.83	6.83	0.878925	1.23034		35184	N/A	5.14	5.28	5.57	5.98	6.13	6.33	6.51	6.59	7	6.83	1996-04-29	1
1	1	1	1	1	6.89		6.89	6.89	6.89	6.89	6.89	6.89	6.89	6.89	6.89	6.89	6.89	0.89702	1.2604		35185	N/A	5.14	5.3	5.62	6.03	6.19	6.4	6.58	6.66	7.06	6.89	1996-04-30	1
1	1	1	1	1	6.91		6.91	6.91	6.91	6.91	6.91	6.91	6.91	6.91	6.91	6.91	6.91	0.921185	1.29266		35186	N/A	5.11	5.29	5.6	6.03	6.19	6.39	6.58	6.68	7.08	6.91	1996-05-01	1
1	1	1	1	1	7.05		7.05	7.05	7.05	7.05	7.05	7.05	7.05	7.05	7.05	7.05	7.05	0.960682	1.36031		35187	N/A	5.13	5.34	5.69	6.16	6.34	6.56	6.75	6.85	7.21	7.05	1996-05-02	1
1	1	1	1	1	7.12		7.12	7.12	7.12	7.12	7.12	7.12	7.12	7.12	7.12	7.12	7.12	0.998913	1.41281		35188	N/A	5.14	5.34	5.69	6.2	6.37	6.61	6.81	6.9	7.29	7.12	1996-05-03	1
1	1	1	1	1	7.07		7.07	7.07	7.07	7.07	7.07	7.07	7.07	7.07	7.07	7.07	7.07	0.975481	1.3797		35191	N/A	5.14	5.35	5.66	6.15	6.34	6.57	6.77	6.86	7.25	7.07	1996-05-06	1
1	1	1	1	1	7.08		7.08	7.08	7.08	7.08	7.08	7.08	7.08	7.08	7.08	7.08	7.08	0.965416	1.36918		35192	N/A	5.14	5.36	5.71	6.2	6.38	6.6	6.8	6.87	7.27	7.08	1996-05-07	1
1	1	1	1	1	7		7	7	7	7	7	7	7	7	7	7	7	0.936109	1.332		35193	N/A	5.13	5.31	5.66	6.15	6.35	6.56	6.74	6.78	7.19	7	1996-05-08	1
1	1	1	1	1	7.02		7.02	7.02	7.02	7.02	7.02	7.02	7.02	7.02	7.02	7.02	7.02	0.944823	1.34403		35194	N/A	5.13	5.32	5.68	6.14	6.35	6.57	6.76	6.84	7.21	7.02	1996-05-09	1
1	1	1	1	1	6.93		6.93	6.93	6.93	6.93	6.93	6.93	6.93	6.93	6.93	6.93	6.93	0.91651	1.29403		35195	N/A	5.13	5.31	5.62	6.04	6.23	6.45	6.65	6.75	7.12	6.93	1996-05-10	1
1	1	1	1	1	6.9		6.9	6.9	6.9	6.9	6.9	6.9	6.9	6.9	6.9	6.9	6.9	0.882471	1.24942		35198	N/A	5.16	5.34	5.62	6.06	6.25	6.45	6.64	6.72	7.09	6.9	1996-05-13	1
1	1	1	1	1	6.85		6.85	6.85	6.85	6.85	6.85	6.85	6.85	6.85	6.85	6.85	6.85	0.873728	1.23403		35199	N/A	5.14	5.31	5.58	6.01	6.19	6.4	6.58	6.66	7.04	6.85	1996-05-14	1
1	1	1	1	1	6.84		6.84	6.84	6.84	6.84	6.84	6.84	6.84	6.84	6.84	6.84	6.84	0.870225	1.22813		35200	N/A	5.13	5.31	5.58	6.01	6.18	6.39	6.56	6.65	7.03	6.84	1996-05-15	1
1	1	1	1	1	6.9		6.9	6.9	6.9	6.9	6.9	6.9	6.9	6.9	6.9	6.9	6.9	0.887289	1.25617		35201	N/A	5.15	5.33	5.6	6.08	6.25	6.45	6.63	6.7	7.08	6.9	1996-05-16	1
1	1	1	1	1	6.84		6.84	6.84	6.84	6.84	6.84	6.84	6.84	6.84	6.84	6.84	6.84	0.858016	1.21357		35202	N/A	5.15	5.33	5.58	6.04	6.2	6.41	6.58	6.65	7.03	6.84	1996-05-17	1
1	1	1	1	1	6.82		6.82	6.82	6.82	6.82	6.82	6.82	6.82	6.82	6.82	6.82	6.82	0.850551	1.20001		35205	N/A	5.17	5.32	5.56	6.02	6.18	6.38	6.54	6.62	7.01	6.82	1996-05-20	1
1	1	1	1	1	6.85		6.85	6.85	6.85	6.85	6.85	6.85	6.85	6.85	6.85	6.85	6.85	0.864386	1.21989		35206	N/A	5.18	5.32	5.57	6.03	6.19	6.41	6.58	6.65	7.04	6.85	1996-05-21	1
1	1	1	1	1	6.81		6.81	6.81	6.81	6.81	6.81	6.81	6.81	6.81	6.81	6.81	6.81	0.83935	1.18726		35207	N/A	5.18	5.32	5.56	6.03	6.19	6.38	6.55	6.63	6.99	6.81	1996-05-22	1
1	1	1	1	1	6.87		6.87	6.87	6.87	6.87	6.87	6.87	6.87	6.87	6.87	6.87	6.87	0.860386	1.21713		35208	N/A	5.18	5.34	5.63	6.05	6.23	6.44	6.6	6.68	7.05	6.87	1996-05-23	1
1	1	1	1	1	6.84		6.84	6.84	6.84	6.84	6.84	6.84	6.84	6.84	6.84	6.84	6.84	0.848705	1.20039		35209	N/A	5.18	5.33	5.61	6.03	6.2	6.42	6.58	6.65	7.01	6.84	1996-05-24	1
1	1	1	1	1	6.85		6.85	6.85	6.85	6.85	6.85	6.85	6.85	6.85	6.85	6.85	6.85	0.8484	1.20257		35213	N/A	5.17	5.34	5.63	6.05	6.23	6.44	6.58	6.67	7.02	6.85	1996-05-28	1
1	1	1	1	1	6.94		6.94	6.94	6.94	6.94	6.94	6.94	6.94	6.94	6.94	6.94	6.94	0.872483	1.24419		35214	N/A	5.18	5.36	5.7	6.16	6.33	6.56	6.69	6.77	7.1	6.94	1996-05-29	1
1	1	1	1	1	6.92		6.92	6.92	6.92	6.92	6.92	6.92	6.92	6.92	6.92	6.92	6.92	0.855373	1.22509		35215	N/A	5.18	5.35	5.71	6.18	6.36	6.55	6.7	6.78	7.08	6.92	1996-05-30	1
1	1	1	1	1	7		7	7	7	7	7	7	7	7	7	7	7	0.883732	1.26868		35216	N/A	5.18	5.36	5.77	6.27	6.44	6.64	6.78	6.85	7.17	7	1996-05-31	1
1	1	1	1	1	7.01		7.01	7.01	7.01	7.01	7.01	7.01	7.01	7.01	7.01	7.01	7.01	0.872468	1.2493		35219	N/A	5.23	5.41	5.78	6.26	6.43	6.64	6.8	6.87	7.19	7.01	1996-06-03	1
1	1	1	1	1	7		7	7	7	7	7	7	7	7	7	7	7	0.871821	1.24919		35220	N/A	5.2	5.42	5.78	6.24	6.44	6.62	6.78	6.86	7.18	7	1996-06-04	1
1	1	1	1	1	6.96		6.96	6.96	6.96	6.96	6.96	6.96	6.96	6.96	6.96	6.96	6.96	0.847193	1.21561		35221	N/A	5.22	5.41	5.76	6.24	6.43	6.6	6.75	6.82	7.14	6.96	1996-06-05	1
1	1	1	1	1	6.91		6.91	6.91	6.91	6.91	6.91	6.91	6.91	6.91	6.91	6.91	6.91	0.841092	1.19771		35222	N/A	5.21	5.4	5.71	6.16	6.32	6.52	6.67	6.76	7.08	6.91	1996-06-06	1
1	1	1	1	1	7.05		7.05	7.05	7.05	7.05	7.05	7.05	7.05	7.05	7.05	7.05	7.05	0.839854	1.21269		35223	N/A	5.26	5.53	5.86	6.4	6.56	6.75	6.87	6.93	7.22	7.05	1996-06-07	1
1	1	1	1	1	7.1		7.1	7.1	7.1	7.1	7.1	7.1	7.1	7.1	7.1	7.1	7.1	0.857629	1.235		35226	N/A	5.29	5.56	5.88	6.4	6.58	6.77	6.91	6.97	7.28	7.1	1996-06-10	1
1	1	1	1	1	7.13		7.13	7.13	7.13	7.13	7.13	7.13	7.13	7.13	7.13	7.13	7.13	0.89073	1.27944		35227	N/A	5.27	5.53	5.87	6.37	6.56	6.77	6.94	6.99	7.31	7.13	1996-06-11	1
1	1	1	1	1	7.18		7.18	7.18	7.18	7.18	7.18	7.18	7.18	7.18	7.18	7.18	7.18	0.919264	1.32083		35228	N/A	5.26	5.53	5.88	6.39	6.59	6.81	6.99	7.03	7.35	7.18	1996-06-12	1
1	1	1	1	1	7.15		7.15	7.15	7.15	7.15	7.15	7.15	7.15	7.15	7.15	7.15	7.15	0.915071	1.31543		35229	N/A	5.24	5.51	5.85	6.36	6.56	6.8	6.95	7.01	7.32	7.15	1996-06-13	1
1	1	1	1	1	7.1		7.1	7.1	7.1	7.1	7.1	7.1	7.1	7.1	7.1	7.1	7.1	0.912544	1.3071		35230	N/A	5.21	5.48	5.8	6.29	6.49	6.72	6.87	6.95	7.26	7.1	1996-06-14	1
1	1	1	1	1	7.06		7.06	7.06	7.06	7.06	7.06	7.06	7.06	7.06	7.06	7.06	7.06	0.90054	1.28991		35233	N/A	5.19	5.46	5.78	6.27	6.47	6.68	6.82	6.9	7.22	7.06	1996-06-17	1
1	1	1	1	1	7.09		7.09	7.09	7.09	7.09	7.09	7.09	7.09	7.09	7.09	7.09	7.09	0.913515	1.3087		35234	N/A	5.21	5.46	5.78	6.28	6.48	6.71	6.87	6.93	7.25	7.09	1996-06-18	1
1	1	1	1	1	7.12		7.12	7.12	7.12	7.12	7.12	7.12	7.12	7.12	7.12	7.12	7.12	0.920953	1.31908		35235	N/A	5.23	5.46	5.81	6.31	6.5	6.74	6.89	6.96	7.27	7.12	1996-06-19	1
1	1	1	1	1	7.12		7.12	7.12	7.12	7.12	7.12	7.12	7.12	7.12	7.12	7.12	7.12	0.894514	1.28525		35236	N/A	5.26	5.48	5.87	6.38	6.55	6.77	6.89	6.98	7.27	7.12	1996-06-20	1
1	1	1	1	1	7.11		7.11	7.11	7.11	7.11	7.11	7.11	7.11	7.11	7.11	7.11	7.11	0.897198	1.28607		35237	N/A	5.26	5.48	5.84	6.35	6.52	6.74	6.87	6.96	7.25	7.11	1996-06-21	1
1	1	1	1	1	7.09		7.09	7.09	7.09	7.09	7.09	7.09	7.09	7.09	7.09	7.09	7.09	0.900621	1.29326		35240	N/A	5.23	5.44	5.83	6.32	6.52	6.72	6.86	6.94	7.24	7.09	1996-06-24	1
1	1	1	1	1	7.06		7.06	7.06	7.06	7.06	7.06	7.06	7.06	7.06	7.06	7.06	7.06	0.883943	1.26902		35241	N/A	5.24	5.44	5.82	6.3	6.5	6.7	6.82	6.91	7.2	7.06	1996-06-25	1
1	1	1	1	1	7.05		7.05	7.05	7.05	7.05	7.05	7.05	7.05	7.05	7.05	7.05	7.05	0.876289	1.25595		35242	N/A	5.24	5.45	5.83	6.3	6.49	6.67	6.8	6.91	7.19	7.05	1996-06-26	1
1	1	1	1	1	6.99		6.99	6.99	6.99	6.99	6.99	6.99	6.99	6.99	6.99	6.99	6.99	0.872838	1.24626		35243	N/A	5.2	5.42	5.77	6.21	6.41	6.59	6.72	6.83	7.13	6.99	1996-06-27	1
1	1	1	1	1	6.9		6.9	6.9	6.9	6.9	6.9	6.9	6.9	6.9	6.9	6.9	6.9	0.854837	1.21354		35244	N/A	5.18	5.37	5.7	6.11	6.3	6.47	6.61	6.73	7.03	6.9	1996-06-28	1
1	1	1	1	1	6.91		6.91	6.91	6.91	6.91	6.91	6.91	6.91	6.91	6.91	6.91	6.91	0.824213	1.16846		35247	N/A	5.27	5.43	5.74	6.15	6.33	6.49	6.61	6.74	7.03	6.91	1996-07-01	1
1	1	1	1	1	6.94		6.94	6.94	6.94	6.94	6.94	6.94	6.94	6.94	6.94	6.94	6.94	0.802711	1.14411		35248	N/A	5.32	5.49	5.8	6.22	6.4	6.56	6.67	6.8	7.06	6.94	1996-07-02	1
1	1	1	1	1	6.94		6.94	6.94	6.94	6.94	6.94	6.94	6.94	6.94	6.94	6.94	6.94	0.839437	1.19447		35249	N/A	5.24	5.43	5.75	6.2	6.36	6.53	6.67	6.78	7.06	6.94	1996-07-03	1
1	1	1	1	1	7.19		7.19	7.19	7.19	7.19	7.19	7.19	7.19	7.19	7.19	7.19	7.19	0.887494	1.27384		35251	N/A	5.31	5.6	5.97	6.44	6.62	6.82	6.95	7.06	7.31	7.19	1996-07-05	1
1	1	1	1	1	7.19		7.19	7.19	7.19	7.19	7.19	7.19	7.19	7.19	7.19	7.19	7.19	0.8719	1.24891		35254	N/A	5.35	5.65	5.98	6.43	6.62	6.81	6.95	7.05	7.32	7.19	1996-07-08	1
1	1	1	1	1	7.15		7.15	7.15	7.15	7.15	7.15	7.15	7.15	7.15	7.15	7.15	7.15	0.857714	1.23078		35255	N/A	5.34	5.63	5.95	6.41	6.61	6.78	6.92	7	7.27	7.15	1996-07-09	1
1	1	1	1	1	7.1		7.1	7.1	7.1	7.1	7.1	7.1	7.1	7.1	7.1	7.1	7.1	0.865847	1.23763		35256	N/A	5.29	5.57	5.89	6.34	6.52	6.71	6.85	6.95	7.22	7.1	1996-07-10	1
1	1	1	1	1	7.07		7.07	7.07	7.07	7.07	7.07	7.07	7.07	7.07	7.07	7.07	7.07	0.8734	1.24581		35257	N/A	5.26	5.53	5.85	6.28	6.47	6.67	6.81	6.9	7.19	7.07	1996-07-11	1
1	1	1	1	1	7.03		7.03	7.03	7.03	7.03	7.03	7.03	7.03	7.03	7.03	7.03	7.03	0.850246	1.21257		35258	N/A	5.28	5.52	5.84	6.26	6.45	6.65	6.76	6.85	7.15	7.03	1996-07-12	1
1	1	1	1	1	7.07		7.07	7.07	7.07	7.07	7.07	7.07	7.07	7.07	7.07	7.07	7.07	0.849968	1.21154		35261	N/A	5.32	5.57	5.86	6.32	6.5	6.67	6.79	6.89	7.18	7.07	1996-07-15	1
1	1	1	1	1	7.03		7.03	7.03	7.03	7.03	7.03	7.03	7.03	7.03	7.03	7.03	7.03	0.872697	1.24071		35262	N/A	5.27	5.49	5.77	6.23	6.42	6.61	6.74	6.84	7.14	7.03	1996-07-16	1
1	1	1	1	1	7.02		7.02	7.02	7.02	7.02	7.02	7.02	7.02	7.02	7.02	7.02	7.02	0.864192	1.23089		35263	N/A	5.26	5.49	5.79	6.23	6.43	6.61	6.75	6.83	7.14	7.02	1996-07-17	1
1	1	1	1	1	6.92		6.92	6.92	6.92	6.92	6.92	6.92	6.92	6.92	6.92	6.92	6.92	0.82338	1.16404		35264	N/A	5.25	5.46	5.79	6.16	6.32	6.5	6.61	6.72	7.02	6.92	1996-07-18	1
1	1	1	1	1	6.97		6.97	6.97	6.97	6.97	6.97	6.97	6.97	6.97	6.97	6.97	6.97	0.835883	1.18209		35265	N/A	5.28	5.5	5.81	6.18	6.35	6.55	6.67	6.78	7.08	6.97	1996-07-19	1
1	1	1	1	1	7.01		7.01	7.01	7.01	7.01	7.01	7.01	7.01	7.01	7.01	7.01	7.01	0.834119	1.18705		35268	N/A	5.3	5.53	5.86	6.23	6.43	6.62	6.73	6.84	7.12	7.01	1996-07-22	1
1	1	1	1	1	6.97		6.97	6.97	6.97	6.97	6.97	6.97	6.97	6.97	6.97	6.97	6.97	0.811659	1.15701		35269	N/A	5.3	5.52	5.85	6.23	6.42	6.6	6.7	6.8	7.08	6.97	1996-07-23	1
1	1	1	1	1	7.04		7.04	7.04	7.04	7.04	7.04	7.04	7.04	7.04	7.04	7.04	7.04	0.847333	1.20613		35270	N/A	5.31	5.53	5.86	6.26	6.46	6.63	6.76	6.87	7.15	7.04	1996-07-24	1
1	1	1	1	1	7.04		7.04	7.04	7.04	7.04	7.04	7.04	7.04	7.04	7.04	7.04	7.04	0.850331	1.21131		35271	N/A	5.29	5.53	5.85	6.28	6.46	6.65	6.74	6.87	7.14	7.04	1996-07-25	1
1	1	1	1	1	7.02		7.02	7.02	7.02	7.02	7.02	7.02	7.02	7.02	7.02	7.02	7.02	0.842448	1.20039		35272	N/A	5.29	5.52	5.85	6.25	6.45	6.62	6.74	6.85	7.12	7.02	1996-07-26	1
1	1	1	1	1	7.09		7.09	7.09	7.09	7.09	7.09	7.09	7.09	7.09	7.09	7.09	7.09	0.845303	1.20315		35275	N/A	5.37	5.56	5.93	6.32	6.5	6.69	6.81	6.93	7.19	7.09	1996-07-29	1
1	1	1	1	1	7.05		7.05	7.05	7.05	7.05	7.05	7.05	7.05	7.05	7.05	7.05	7.05	0.843995	1.20226		35276	N/A	5.34	5.51	5.88	6.3	6.47	6.65	6.77	6.89	7.14	7.05	1996-07-30	1
1	1	1	1	1	6.98		6.98	6.98	6.98	6.98	6.98	6.98	6.98	6.98	6.98	6.98	6.98	0.827752	1.1739		35277	N/A	5.32	5.47	5.85	6.22	6.39	6.57	6.68	6.8	7.07	6.98	1996-07-31	1
1	1	1	1	1	6.84		6.84	6.84	6.84	6.84	6.84	6.84	6.84	6.84	6.84	6.84	6.84	0.800119	1.12788		35278	N/A	5.25	5.41	5.74	6.08	6.25	6.41	6.52	6.65	6.94	6.84	1996-08-01	1
1	1	1	1	1	6.74		6.74	6.74	6.74	6.74	6.74	6.74	6.74	6.74	6.74	6.74	6.74	0.808438	1.12657		35279	N/A	5.21	5.32	5.6	5.91	6.09	6.26	6.38	6.51	6.83	6.74	1996-08-02	1
1	1	1	1	1	6.75		6.75	6.75	6.75	6.75	6.75	6.75	6.75	6.75	6.75	6.75	6.75	0.812667	1.1351		35282	N/A	5.2	5.32	5.6	5.93	6.1	6.28	6.4	6.53	6.84	6.75	1996-08-05	1
1	1	1	1	1	6.76		6.76	6.76	6.76	6.76	6.76	6.76	6.76	6.76	6.76	6.76	6.76	0.816962	1.14454		35283	N/A	5.19	5.32	5.61	5.93	6.13	6.29	6.42	6.54	6.86	6.76	1996-08-06	1
1	1	1	1	1	6.78		6.78	6.78	6.78	6.78	6.78	6.78	6.78	6.78	6.78	6.78	6.78	0.825045	1.15449		35284	N/A	5.18	5.33	5.62	5.97	6.14	6.3	6.43	6.55	6.87	6.78	1996-08-07	1
1	1	1	1	1	6.76		6.76	6.76	6.76	6.76	6.76	6.76	6.76	6.76	6.76	6.76	6.76	0.816411	1.14549		35285	N/A	5.15	5.33	5.62	5.97	6.14	6.29	6.43	6.56	6.89	6.76	1996-08-08	1
1	1	1	1	1	6.7		6.7	6.7	6.7	6.7	6.7	6.7	6.7	6.7	6.7	6.7	6.7	0.792986	1.11146		35286	N/A	5.15	5.32	5.57	5.93	6.09	6.25	6.37	6.5	6.83	6.7	1996-08-09	1
1	1	1	1	1	6.7		6.7	6.7	6.7	6.7	6.7	6.7	6.7	6.7	6.7	6.7	6.7	0.79181	1.10754		35289	N/A	5.18	5.3	5.58	5.92	6.08	6.24	6.37	6.49	6.82	6.7	1996-08-12	1
1	1	1	1	1	6.78		6.78	6.78	6.78	6.78	6.78	6.78	6.78	6.78	6.78	6.78	6.78	0.825877	1.15778		35290	N/A	5.17	5.32	5.63	5.97	6.14	6.32	6.44	6.57	6.92	6.78	1996-08-13	1
1	1	1	1	1	6.78		6.78	6.78	6.78	6.78	6.78	6.78	6.78	6.78	6.78	6.78	6.78	0.830356	1.16707		35291	N/A	5.16	5.31	5.61	5.97	6.14	6.33	6.46	6.58	6.92	6.78	1996-08-14	1
1	1	1	1	1	6.82		6.82	6.82	6.82	6.82	6.82	6.82	6.82	6.82	6.82	6.82	6.82	0.834272	1.17178		35292	N/A	5.19	5.34	5.66	6	6.17	6.37	6.49	6.62	6.95	6.82	1996-08-15	1
1	1	1	1	1	6.77		6.77	6.77	6.77	6.77	6.77	6.77	6.77	6.77	6.77	6.77	6.77	0.822767	1.15313		35293	N/A	5.18	5.32	5.61	5.95	6.13	6.31	6.43	6.56	6.9	6.77	1996-08-16	1
1	1	1	1	1	6.8		6.8	6.8	6.8	6.8	6.8	6.8	6.8	6.8	6.8	6.8	6.8	0.825926	1.15732		35296	N/A	5.2	5.35	5.64	5.97	6.15	6.34	6.47	6.59	6.94	6.8	1996-08-19	1
1	1	1	1	1	6.8		6.8	6.8	6.8	6.8	6.8	6.8	6.8	6.8	6.8	6.8	6.8	0.837523	1.1744		35297	N/A	5.18	5.32	5.62	5.97	6.14	6.34	6.47	6.59	6.94	6.8	1996-08-20	1
1	1	1	1	1	6.83		6.83	6.83	6.83	6.83	6.83	6.83	6.83	6.83	6.83	6.83	6.83	0.865663	1.21381		35298	N/A	5.14	5.3	5.62	5.99	6.15	6.35	6.49	6.61	6.97	6.83	1996-08-21	1
1	1	1	1	1	6.84		6.84	6.84	6.84	6.84	6.84	6.84	6.84	6.84	6.84	6.84	6.84	0.869059	1.22364		35299	N/A	5.14	5.29	5.62	6	6.18	6.38	6.51	6.62	6.97	6.84	1996-08-22	1
1	1	1	1	1	6.93		6.93	6.93	6.93	6.93	6.93	6.93	6.93	6.93	6.93	6.93	6.93	0.894691	1.2652		35300	N/A	5.15	5.32	5.69	6.09	6.27	6.48	6.61	6.72	7.06	6.93	1996-08-23	1
1	1	1	1	1	7		7	7	7	7	7	7	7	7	7	7	7	0.893604	1.26857		35303	N/A	5.21	5.37	5.77	6.18	6.37	6.57	6.69	6.8	7.14	7	1996-08-26	1
1	1	1	1	1	6.97		6.97	6.97	6.97	6.97	6.97	6.97	6.97	6.97	6.97	6.97	6.97	0.880403	1.25133		35304	N/A	5.2	5.36	5.76	6.17	6.36	6.55	6.67	6.78	7.12	6.97	1996-08-27	1
1	1	1	1	1	6.99		6.99	6.99	6.99	6.99	6.99	6.99	6.99	6.99	6.99	6.99	6.99	0.892356	1.26663		35305	N/A	5.2	5.36	5.77	6.17	6.36	6.56	6.68	6.79	7.13	6.99	1996-08-28	1
1	1	1	1	1	7.05		7.05	7.05	7.05	7.05	7.05	7.05	7.05	7.05	7.05	7.05	7.05	0.899156	1.27679		35306	N/A	5.24	5.41	5.82	6.23	6.42	6.61	6.74	6.86	7.19	7.05	1996-08-29	1
1	1	1	1	1	7.13		7.13	7.13	7.13	7.13	7.13	7.13	7.13	7.13	7.13	7.13	7.13	0.895448	1.27966		35307	N/A	5.29	5.49	5.91	6.34	6.54	6.73	6.86	6.96	7.28	7.13	1996-08-30	1
1	1	1	1	1	7.07		7.07	7.07	7.07	7.07	7.07	7.07	7.07	7.07	7.07	7.07	7.07	0.830717	1.18978		35311	N/A	5.32	5.58	5.94	6.35	6.54	6.71	6.83	6.92	7.22	7.07	1996-09-03	1
1	1	1	1	1	7.1		7.1	7.1	7.1	7.1	7.1	7.1	7.1	7.1	7.1	7.1	7.1	0.842394	1.20616		35312	N/A	5.32	5.58	5.97	6.38	6.56	6.74	6.85	6.94	7.25	7.1	1996-09-04	1
1	1	1	1	1	7.15		7.15	7.15	7.15	7.15	7.15	7.15	7.15	7.15	7.15	7.15	7.15	0.868436	1.23867		35313	N/A	5.34	5.59	5.98	6.38	6.56	6.76	6.88	6.98	7.3	7.15	1996-09-05	1
1	1	1	1	1	7.12		7.12	7.12	7.12	7.12	7.12	7.12	7.12	7.12	7.12	7.12	7.12	0.869901	1.2386		35314	N/A	5.33	5.57	5.92	6.33	6.52	6.72	6.84	6.94	7.27	7.12	1996-09-06	1
1	1	1	1	1	7.08		7.08	7.08	7.08	7.08	7.08	7.08	7.08	7.08	7.08	7.08	7.08	0.869718	1.23669		35317	N/A	5.29	5.5	5.91	6.32	6.47	6.67	6.8	6.9	7.23	7.08	1996-09-09	1
1	1	1	1	1	7.13		7.13	7.13	7.13	7.13	7.13	7.13	7.13	7.13	7.13	7.13	7.13	0.886556	1.26064		35318	N/A	5.29	5.55	5.93	6.34	6.52	6.7	6.84	6.94	7.28	7.13	1996-09-10	1
1	1	1	1	1	7.12		7.12	7.12	7.12	7.12	7.12	7.12	7.12	7.12	7.12	7.12	7.12	0.880015	1.25195		35319	N/A	5.31	5.52	5.94	6.34	6.51	6.7	6.84	6.94	7.27	7.12	1996-09-11	1
1	1	1	1	1	7.08		7.08	7.08	7.08	7.08	7.08	7.08	7.08	7.08	7.08	7.08	7.08	0.880842	1.24779		35320	N/A	5.28	5.5	5.9	6.27	6.44	6.64	6.79	6.88	7.23	7.08	1996-09-12	1
1	1	1	1	1	6.95		6.95	6.95	6.95	6.95	6.95	6.95	6.95	6.95	6.95	6.95	6.95	0.878961	1.23928		35321	N/A	5.21	5.38	5.74	6.1	6.29	6.48	6.64	6.74	7.1	6.95	1996-09-13	1
1	1	1	1	1	6.95		6.95	6.95	6.95	6.95	6.95	6.95	6.95	6.95	6.95	6.95	6.95	0.8759	1.23674		35324	N/A	5.2	5.38	5.74	6.14	6.31	6.49	6.63	6.73	7.09	6.95	1996-09-16	1
1	1	1	1	1	7		7	7	7	7	7	7	7	7	7	7	7	0.847708	1.20042		35325	N/A	5.31	5.46	5.83	6.22	6.39	6.57	6.71	6.81	7.15	7	1996-09-17	1
1	1	1	1	1	7.02		7.02	7.02	7.02	7.02	7.02	7.02	7.02	7.02	7.02	7.02	7.02	0.855788	1.21656		35326	N/A	5.28	5.47	5.84	6.26	6.43	6.61	6.73	6.83	7.16	7.02	1996-09-18	1
1	1	1	1	1	7.05		7.05	7.05	7.05	7.05	7.05	7.05	7.05	7.05	7.05	7.05	7.05	0.871832	1.24278		35327	N/A	5.25	5.48	5.85	6.29	6.46	6.65	6.77	6.87	7.19	7.05	1996-09-19	1
1	1	1	1	1	7.04		7.04	7.04	7.04	7.04	7.04	7.04	7.04	7.04	7.04	7.04	7.04	0.860597	1.22136		35328	N/A	5.29	5.5	5.85	6.26	6.43	6.62	6.75	6.85	7.18	7.04	1996-09-20	1
1	1	1	1	1	7.02		7.02	7.02	7.02	7.02	7.02	7.02	7.02	7.02	7.02	7.02	7.02	0.848121	1.20098		35331	N/A	5.31	5.5	5.85	6.24	6.4	6.6	6.73	6.83	7.16	7.02	1996-09-23	1
1	1	1	1	1	6.99		6.99	6.99	6.99	6.99	6.99	6.99	6.99	6.99	6.99	6.99	6.99	0.907083	1.28166		35332	N/A	5.17	5.37	5.73	6.16	6.32	6.52	6.67	6.77	7.12	6.99	1996-09-24	1
1	1	1	1	1	6.93		6.93	6.93	6.93	6.93	6.93	6.93	6.93	6.93	6.93	6.93	6.93	0.918457	1.2975		35333	N/A	5.07	5.28	5.7	6.08	6.25	6.46	6.59	6.71	7.05	6.93	1996-09-25	1
1	1	1	1	1	6.88		6.88	6.88	6.88	6.88	6.88	6.88	6.88	6.88	6.88	6.88	6.88	0.91592	1.29562		35334	N/A	5	5.25	5.65	6.05	6.22	6.41	6.54	6.66	7	6.88	1996-09-26	1
1	1	1	1	1	6.91		6.91	6.91	6.91	6.91	6.91	6.91	6.91	6.91	6.91	6.91	6.91	0.922112	1.30417		35335	N/A	5.04	5.24	5.68	6.07	6.25	6.43	6.57	6.68	7.03	6.91	1996-09-27	1
1	1	1	1	1	6.93		6.93	6.93	6.93	6.93	6.93	6.93	6.93	6.93	6.93	6.93	6.93	0.88553	1.2502		35338	N/A	5.14	5.37	5.71	6.1	6.28	6.46	6.6	6.72	7.05	6.93	1996-09-30	1
1	1	1	1	1	6.88		6.88	6.88	6.88	6.88	6.88	6.88	6.88	6.88	6.88	6.88	6.88	0.884256	1.24456		35339	N/A	5.1	5.35	5.65	6.03	6.22	6.39	6.54	6.65	6.99	6.88	1996-10-01	1
1	1	1	1	1	6.84		6.84	6.84	6.84	6.84	6.84	6.84	6.84	6.84	6.84	6.84	6.84	0.896194	1.25945		35340	N/A	5.03	5.29	5.61	5.98	6.15	6.35	6.49	6.61	6.95	6.84	1996-10-02	1
1	1	1	1	1	6.84		6.84	6.84	6.84	6.84	6.84	6.84	6.84	6.84	6.84	6.84	6.84	0.888789	1.24895		35341	N/A	5.04	5.31	5.61	6	6.16	6.35	6.49	6.61	6.95	6.84	1996-10-03	1
1	1	1	1	1	6.74		6.74	6.74	6.74	6.74	6.74	6.74	6.74	6.74	6.74	6.74	6.74	0.889699	1.23676		35342	N/A	5.01	5.24	5.47	5.85	6	6.2	6.36	6.48	6.83	6.74	1996-10-04	1
1	1	1	1	1	6.78		6.78	6.78	6.78	6.78	6.78	6.78	6.78	6.78	6.78	6.78	6.78	0.872421	1.21356		35345	N/A	5.11	5.29	5.53	5.89	6.06	6.25	6.41	6.53	6.88	6.78	1996-10-07	1
1	1	1	1	1	6.79		6.79	6.79	6.79	6.79	6.79	6.79	6.79	6.79	6.79	6.79	6.79	0.876299	1.21808		35346	N/A	5.12	5.29	5.53	5.9	6.06	6.26	6.42	6.53	6.89	6.79	1996-10-08	1
1	1	1	1	1	6.83		6.83	6.83	6.83	6.83	6.83	6.83	6.83	6.83	6.83	6.83	6.83	0.88515	1.23323		35347	N/A	5.12	5.31	5.56	5.96	6.11	6.31	6.46	6.55	6.93	6.83	1996-10-09	1
1	1	1	1	1	6.89		6.89	6.89	6.89	6.89	6.89	6.89	6.89	6.89	6.89	6.89	6.89	0.889648	1.23988		35348	N/A	5.15	5.35	5.66	6.01	6.17	6.37	6.51	6.61	6.98	6.89	1996-10-10	1
1	1	1	1	1	6.84		6.84	6.84	6.84	6.84	6.84	6.84	6.84	6.84	6.84	6.84	6.84	0.895742	1.24292		35349	N/A	5.13	5.31	5.57	5.92	6.09	6.29	6.46	6.55	6.93	6.84	1996-10-11	1
1	1	1	1	1	6.85		6.85	6.85	6.85	6.85	6.85	6.85	6.85	6.85	6.85	6.85	6.85	0.887852	1.22978		35353	N/A	5.17	5.34	5.58	5.93	6.1	6.3	6.46	6.56	6.94	6.85	1996-10-15	1
1	1	1	1	1	6.86		6.86	6.86	6.86	6.86	6.86	6.86	6.86	6.86	6.86	6.86	6.86	0.898903	1.24773		35354	N/A	5.14	5.33	5.58	5.94	6.12	6.31	6.46	6.57	6.96	6.86	1996-10-16	1
1	1	1	1	1	6.81		6.81	6.81	6.81	6.81	6.81	6.81	6.81	6.81	6.81	6.81	6.81	0.893782	1.23666		35355	N/A	5.12	5.3	5.52	5.89	6.06	6.25	6.4	6.51	6.89	6.81	1996-10-17	1
1	1	1	1	1	6.79		6.79	6.79	6.79	6.79	6.79	6.79	6.79	6.79	6.79	6.79	6.79	0.878718	1.21673		35356	N/A	5.12	5.31	5.52	5.89	6.05	6.25	6.39	6.5	6.88	6.79	1996-10-18	1
1	1	1	1	1	6.81		6.81	6.81	6.81	6.81	6.81	6.81	6.81	6.81	6.81	6.81	6.81	0.875791	1.21222		35359	N/A	5.14	5.34	5.55	5.91	6.07	6.27	6.41	6.52	6.89	6.81	1996-10-21	1
1	1	1	1	1	6.85		6.85	6.85	6.85	6.85	6.85	6.85	6.85	6.85	6.85	6.85	6.85	0.88572	1.22919		35360	N/A	5.16	5.35	5.57	5.95	6.12	6.31	6.45	6.56	6.93	6.85	1996-10-22	1
1	1	1	1	1	6.84		6.84	6.84	6.84	6.84	6.84	6.84	6.84	6.84	6.84	6.84	6.84	0.88796	1.23471		35361	N/A	5.13	5.34	5.56	5.94	6.11	6.31	6.45	6.56	6.92	6.84	1996-10-23	1
1	1	1	1	1	6.85		6.85	6.85	6.85	6.85	6.85	6.85	6.85	6.85	6.85	6.85	6.85	0.895392	1.24068		35362	N/A	5.14	5.34	5.56	5.94	6.1	6.29	6.45	6.57	6.94	6.85	1996-10-24	1
1	1	1	1	1	6.82		6.82	6.82	6.82	6.82	6.82	6.82	6.82	6.82	6.82	6.82	6.82	0.885371	1.22489		35363	N/A	5.14	5.33	5.55	5.9	6.07	6.26	6.42	6.54	6.9	6.82	1996-10-25	1
1	1	1	1	1	6.83		6.83	6.83	6.83	6.83	6.83	6.83	6.83	6.83	6.83	6.83	6.83	0.874617	1.21249		35366	N/A	5.19	5.34	5.56	5.92	6.1	6.29	6.43	6.56	6.91	6.83	1996-10-28	1
1	1	1	1	1	6.7		6.7	6.7	6.7	6.7	6.7	6.7	6.7	6.7	6.7	6.7	6.7	0.852264	1.16586		35367	N/A	5.14	5.3	5.46	5.77	5.94	6.12	6.27	6.4	6.77	6.7	1996-10-29	1
1	1	1	1	1	6.69		6.69	6.69	6.69	6.69	6.69	6.69	6.69	6.69	6.69	6.69	6.69	0.841908	1.15391		35368	N/A	5.14	5.3	5.46	5.79	5.95	6.12	6.27	6.4	6.77	6.69	1996-10-30	1
1	1	1	1	1	6.66		6.66	6.66	6.66	6.66	6.66	6.66	6.66	6.66	6.66	6.66	6.66	0.824527	1.12696		35369	N/A	5.17	5.3	5.44	5.77	5.92	6.1	6.24	6.37	6.74	6.66	1996-10-31	1
1	1	1	1	1	6.68		6.68	6.68	6.68	6.68	6.68	6.68	6.68	6.68	6.68	6.68	6.68	0.832504	1.1371		35370	N/A	5.17	5.3	5.46	5.79	5.93	6.11	6.26	6.38	6.75	6.68	1996-11-01	1
1	1	1	1	1	6.67		6.67	6.67	6.67	6.67	6.67	6.67	6.67	6.67	6.67	6.67	6.67	0.826026	1.12459		35373	N/A	5.19	5.3	5.46	5.78	5.92	6.1	6.23	6.36	6.74	6.67	1996-11-04	1
1	1	1	1	1	6.6		6.6	6.6	6.6	6.6	6.6	6.6	6.6	6.6	6.6	6.6	6.6	0.803085	1.08833		35374	N/A	5.17	5.27	5.43	5.74	5.86	6.03	6.16	6.28	6.66	6.6	1996-11-05	1
1	1	1	1	1	6.61		6.61	6.61	6.61	6.61	6.61	6.61	6.61	6.61	6.61	6.61	6.61	0.799784	1.08939		35375	N/A	5.17	5.28	5.44	5.76	5.9	6.05	6.18	6.3	6.67	6.61	1996-11-06	1
1	1	1	1	1	6.48		6.48	6.48	6.48	6.48	6.48	6.48	6.48	6.48	6.48	6.48	6.48	0.712537	0.979479		35376	N/A	5.16	5.28	5.44	5.75	5.87	6.01	6.12	6.26	6.61	6.48	1996-11-07	1
1	1	1	1	1	6.51		6.51	6.51	6.51	6.51	6.51	6.51	6.51	6.51	6.51	6.51	6.51	0.722779	0.994324		35377	N/A	5.18	5.29	5.45	5.76	5.88	6.04	6.16	6.29	6.63	6.51	1996-11-08	1
1	1	1	1	1	6.44		6.44	6.44	6.44	6.44	6.44	6.44	6.44	6.44	6.44	6.44	6.44	0.687902	0.941732		35381	N/A	5.18	5.29	5.43	5.73	5.84	5.98	6.09	6.19	6.56	6.44	1996-11-12	1
1	1	1	1	1	6.46		6.46	6.46	6.46	6.46	6.46	6.46	6.46	6.46	6.46	6.46	6.46	0.708231	0.969598		35382	N/A	5.17	5.28	5.42	5.71	5.84	5.99	6.1	6.2	6.58	6.46	1996-11-13	1
1	1	1	1	1	6.42		6.42	6.42	6.42	6.42	6.42	6.42	6.42	6.42	6.42	6.42	6.42	0.699838	0.948999		35383	N/A	5.17	5.27	5.4	5.66	5.77	5.93	6.05	6.15	6.53	6.42	1996-11-14	1
1	1	1	1	1	6.46		6.46	6.46	6.46	6.46	6.46	6.46	6.46	6.46	6.46	6.46	6.46	0.724807	0.986103		35384	N/A	5.16	5.26	5.4	5.68	5.79	5.96	6.09	6.19	6.55	6.46	1996-11-15	1
1	1	1	1	1	6.46		6.46	6.46	6.46	6.46	6.46	6.46	6.46	6.46	6.46	6.46	6.46	0.713786	0.973098		35387	N/A	5.18	5.27	5.41	5.7	5.81	5.97	6.1	6.2	6.56	6.46	1996-11-18	1
1	1	1	1	1	6.44		6.44	6.44	6.44	6.44	6.44	6.44	6.44	6.44	6.44	6.44	6.44	0.711465	0.965867		35388	N/A	5.17	5.26	5.4	5.68	5.78	5.94	6.07	6.17	6.53	6.44	1996-11-19	1
1	1	1	1	1	6.41		6.41	6.41	6.41	6.41	6.41	6.41	6.41	6.41	6.41	6.41	6.41	0.695793	0.944225		35389	N/A	5.17	5.26	5.4	5.65	5.77	5.92	6.04	6.14	6.5	6.41	1996-11-20	1
1	1	1	1	1	6.42		6.42	6.42	6.42	6.42	6.42	6.42	6.42	6.42	6.42	6.42	6.42	0.693188	0.940829		35390	N/A	5.18	5.26	5.43	5.67	5.78	5.94	6.05	6.15	6.52	6.42	1996-11-21	1
1	1	1	1	1	6.44		6.44	6.44	6.44	6.44	6.44	6.44	6.44	6.44	6.44	6.44	6.44	0.702256	0.950684		35391	N/A	5.18	5.27	5.44	5.69	5.8	5.94	6.05	6.15	6.54	6.44	1996-11-22	1
1	1	1	1	1	6.42		6.42	6.42	6.42	6.42	6.42	6.42	6.42	6.42	6.42	6.42	6.42	0.693666	0.935927		35394	N/A	5.18	5.28	5.43	5.67	5.77	5.92	6.04	6.13	6.53	6.42	1996-11-25	1
1	1	1	1	1	6.43		6.43	6.43	6.43	6.43	6.43	6.43	6.43	6.43	6.43	6.43	6.43	0.710186	0.958311		35395	N/A	5.16	5.27	5.41	5.66	5.77	5.91	6.04	6.13	6.52	6.43	1996-11-26	1
1	1	1	1	1	6.44		6.44	6.44	6.44	6.44	6.44	6.44	6.44	6.44	6.44	6.44	6.44	0.720215	0.972193		35396	N/A	5.15	5.26	5.41	5.66	5.77	5.91	6.05	6.14	6.53	6.44	1996-11-27	1
1	1	1	1	1	6.36		6.36	6.36	6.36	6.36	6.36	6.36	6.36	6.36	6.36	6.36	6.36	0.691145	0.927179		35398	N/A	5.13	5.25	5.38	5.59	5.7	5.84	5.97	6.06	6.45	6.36	1996-11-29	1
1	1	1	1	1	6.36		6.36	6.36	6.36	6.36	6.36	6.36	6.36	6.36	6.36	6.36	6.36	0.693286	0.935617		35401	N/A	5.08	5.24	5.4	5.61	5.72	5.85	5.97	6.08	6.46	6.36	1996-12-02	1
1	1	1	1	1	6.35		6.35	6.35	6.35	6.35	6.35	6.35	6.35	6.35	6.35	6.35	6.35	0.698759	0.941924		35402	N/A	5.05	5.22	5.39	5.61	5.7	5.84	5.95	6.06	6.44	6.35	1996-12-03	1
1	1	1	1	1	6.4		6.4	6.4	6.4	6.4	6.4	6.4	6.4	6.4	6.4	6.4	6.4	0.726229	0.98738		35403	N/A	5.03	5.2	5.41	5.64	5.75	5.89	6.01	6.11	6.49	6.4	1996-12-04	1
1	1	1	1	1	6.5		6.5	6.5	6.5	6.5	6.5	6.5	6.5	6.5	6.5	6.5	6.5	0.767108	1.0505		35404	N/A	5.04	5.22	5.44	5.71	5.82	5.99	6.12	6.22	6.6	6.5	1996-12-05	1
1	1	1	1	1	6.53		6.53	6.53	6.53	6.53	6.53	6.53	6.53	6.53	6.53	6.53	6.53	0.780472	1.07204		35405	N/A	5.03	5.23	5.45	5.73	5.84	6.02	6.16	6.26	6.62	6.53	1996-12-06	1
1	1	1	1	1	6.48		6.48	6.48	6.48	6.48	6.48	6.48	6.48	6.48	6.48	6.48	6.48	0.776946	1.06877		35408	N/A	4.96	5.18	5.43	5.7	5.81	5.97	6.11	6.21	6.58	6.48	1996-12-09	1
1	1	1	1	1	6.49		6.49	6.49	6.49	6.49	6.49	6.49	6.49	6.49	6.49	6.49	6.49	0.778285	1.07358		35409	N/A	4.96	5.19	5.43	5.71	5.83	5.99	6.12	6.23	6.59	6.49	1996-12-10	1
1	1	1	1	1	6.61		6.61	6.61	6.61	6.61	6.61	6.61	6.61	6.61	6.61	6.61	6.61	0.818058	1.14307		35410	N/A	4.96	5.22	5.49	5.82	5.95	6.14	6.28	6.38	6.71	6.61	1996-12-11	1
1	1	1	1	1	6.64		6.64	6.64	6.64	6.64	6.64	6.64	6.64	6.64	6.64	6.64	6.64	0.836323	1.16833		35411	N/A	4.97	5.2	5.49	5.84	5.98	6.14	6.3	6.4	6.74	6.64	1996-12-12	1
1	1	1	1	1	6.58		6.58	6.58	6.58	6.58	6.58	6.58	6.58	6.58	6.58	6.58	6.58	0.826774	1.14634		35412	N/A	4.92	5.2	5.46	5.77	5.89	6.06	6.22	6.33	6.68	6.58	1996-12-13	1
1	1	1	1	1	6.63		6.63	6.63	6.63	6.63	6.63	6.63	6.63	6.63	6.63	6.63	6.63	0.831598	1.15753		35415	N/A	4.97	5.22	5.49	5.82	5.95	6.13	6.27	6.39	6.72	6.63	1996-12-16	1
1	1	1	1	1	6.66		6.66	6.66	6.66	6.66	6.66	6.66	6.66	6.66	6.66	6.66	6.66	0.82646	1.15189		35416	N/A	5	5.27	5.51	5.87	5.99	6.17	6.31	6.42	6.76	6.66	1996-12-17	1
1	1	1	1	1	6.69		6.69	6.69	6.69	6.69	6.69	6.69	6.69	6.69	6.69	6.69	6.69	0.826279	1.15614		35417	N/A	5.03	5.28	5.55	5.89	6.04	6.21	6.36	6.46	6.8	6.69	1996-12-18	1
1	1	1	1	1	6.6		6.6	6.6	6.6	6.6	6.6	6.6	6.6	6.6	6.6	6.6	6.6	0.795413	1.10937		35418	N/A	5.01	5.25	5.5	5.83	5.97	6.13	6.25	6.36	6.69	6.6	1996-12-19	1
1	1	1	1	1	6.59		6.59	6.59	6.59	6.59	6.59	6.59	6.59	6.59	6.59	6.59	6.59	0.788272	1.0974		35419	N/A	5.02	5.26	5.49	5.83	5.95	6.12	6.25	6.35	6.69	6.59	1996-12-20	1
1	1	1	1	1	6.58		6.58	6.58	6.58	6.58	6.58	6.58	6.58	6.58	6.58	6.58	6.58	0.755345	1.04986		35422	N/A	5.1	5.29	5.52	5.85	5.97	6.12	6.24	6.34	6.67	6.58	1996-12-23	1
1	1	1	1	1	6.59		6.59	6.59	6.59	6.59	6.59	6.59	6.59	6.59	6.59	6.59	6.59	0.766735	1.06831		35423	N/A	5.09	5.27	5.51	5.85	5.98	6.13	6.25	6.36	6.68	6.59	1996-12-24	1
1	1	1	1	1	6.59		6.59	6.59	6.59	6.59	6.59	6.59	6.59	6.59	6.59	6.59	6.59	0.766527	1.06754		35425	N/A	5.1	5.27	5.5	5.85	5.98	6.13	6.25	6.35	6.68	6.59	1996-12-26	1
1	1	1	1	1	6.54		6.54	6.54	6.54	6.54	6.54	6.54	6.54	6.54	6.54	6.54	6.54	0.742202	1.03056		35426	N/A	5.11	5.28	5.47	5.81	5.93	6.09	6.21	6.3	6.63	6.54	1996-12-27	1
1	1	1	1	1	6.54		6.54	6.54	6.54	6.54	6.54	6.54	6.54	6.54	6.54	6.54	6.54	0.722087	1.00239		35429	N/A	5.21	5.29	5.47	5.8	5.95	6.1	6.21	6.31	6.63	6.54	1996-12-30	1
1	1	1	1	1	6.65		6.65	6.65	6.65	6.65	6.65	6.65	6.65	6.65	6.65	6.65	6.65	0.764264	1.0685		35430	N/A	5.21	5.33	5.51	5.88	6.04	6.21	6.34	6.43	6.73	6.65	1996-12-31	1
1	1	1	1	1	6.75		6.75	6.75	6.75	6.75	6.75	6.75	6.75	6.75	6.75	6.75	6.75	0.797006	1.11861		35432	N/A	5.19	5.35	5.63	5.97	6.13	6.3	6.45	6.54	6.85	6.75	1997-01-02	1
1	1	1	1	1	6.74		6.74	6.74	6.74	6.74	6.74	6.74	6.74	6.74	6.74	6.74	6.74	0.804414	1.12682		35433	N/A	5.17	5.34	5.6	5.95	6.11	6.28	6.42	6.52	6.84	6.74	1997-01-03	1
1	1	1	1	1	6.77		6.77	6.77	6.77	6.77	6.77	6.77	6.77	6.77	6.77	6.77	6.77	0.8252	1.15561		35436	N/A	5.17	5.31	5.61	5.97	6.12	6.3	6.44	6.54	6.86	6.77	1997-01-06	1
1	1	1	1	1	6.8		6.8	6.8	6.8	6.8	6.8	6.8	6.8	6.8	6.8	6.8	6.8	0.845523	1.18559		35437	N/A	5.16	5.3	5.61	5.98	6.14	6.32	6.47	6.57	6.89	6.8	1997-01-07	1
1	1	1	1	1	6.83		6.83	6.83	6.83	6.83	6.83	6.83	6.83	6.83	6.83	6.83	6.83	0.860386	1.20753		35438	N/A	5.16	5.3	5.61	6.01	6.17	6.34	6.49	6.6	6.92	6.83	1997-01-08	1
1	1	1	1	1	6.76		6.76	6.76	6.76	6.76	6.76	6.76	6.76	6.76	6.76	6.76	6.76	0.843661	1.1803		35439	N/A	5.13	5.27	5.57	5.94	6.1	6.27	6.41	6.52	6.85	6.76	1997-01-09	1
1	1	1	1	1	6.86		6.86	6.86	6.86	6.86	6.86	6.86	6.86	6.86	6.86	6.86	6.86	0.857374	1.2064		35440	N/A	5.17	5.33	5.66	6.06	6.21	6.4	6.52	6.63	6.94	6.86	1997-01-10	1
1	1	1	1	1	6.85		6.85	6.85	6.85	6.85	6.85	6.85	6.85	6.85	6.85	6.85	6.85	0.868421	1.22711		35443	N/A	5.08	5.31	5.66	6.07	6.22	6.4	6.52	6.63	6.95	6.85	1997-01-13	1
1	1	1	1	1	6.77		6.77	6.77	6.77	6.77	6.77	6.77	6.77	6.77	6.77	6.77	6.77	0.829244	1.16098		35444	N/A	5.19	5.27	5.6	5.98	6.12	6.3	6.43	6.53	6.86	6.77	1997-01-14	1
1	1	1	1	1	6.79		6.79	6.79	6.79	6.79	6.79	6.79	6.79	6.79	6.79	6.79	6.79	0.851421	1.19008		35445	N/A	5.16	5.28	5.57	5.98	6.12	6.3	6.43	6.53	6.87	6.79	1997-01-15	1
1	1	1	1	1	6.83		6.83	6.83	6.83	6.83	6.83	6.83	6.83	6.83	6.83	6.83	6.83	0.867845	1.21398		35446	N/A	5.16	5.28	5.61	6	6.15	6.33	6.47	6.57	6.91	6.83	1997-01-16	1
1	1	1	1	1	6.83		6.83	6.83	6.83	6.83	6.83	6.83	6.83	6.83	6.83	6.83	6.83	0.87445	1.22151		35447	N/A	5.14	5.28	5.6	6	6.14	6.32	6.46	6.56	6.9	6.83	1997-01-17	1
1	1	1	1	1	6.78		6.78	6.78	6.78	6.78	6.78	6.78	6.78	6.78	6.78	6.78	6.78	0.832521	1.16081		35451	N/A	5.18	5.31	5.6	5.99	6.12	6.29	6.41	6.52	6.86	6.78	1997-01-21	1
1	1	1	1	1	6.83		6.83	6.83	6.83	6.83	6.83	6.83	6.83	6.83	6.83	6.83	6.83	0.859122	1.19786		35452	N/A	5.18	5.33	5.6	6	6.15	6.32	6.45	6.56	6.9	6.83	1997-01-22	1
1	1	1	1	1	6.85		6.85	6.85	6.85	6.85	6.85	6.85	6.85	6.85	6.85	6.85	6.85	0.857592	1.2005		35453	N/A	5.18	5.34	5.62	6.06	6.19	6.35	6.49	6.6	6.93	6.85	1997-01-23	1
1	1	1	1	1	6.89		6.89	6.89	6.89	6.89	6.89	6.89	6.89	6.89	6.89	6.89	6.89	0.883773	1.23941		35454	N/A	5.16	5.34	5.62	6.07	6.21	6.39	6.53	6.64	6.97	6.89	1997-01-24	1
1	1	1	1	1	6.94		6.94	6.94	6.94	6.94	6.94	6.94	6.94	6.94	6.94	6.94	6.94	0.896001	1.2554		35457	N/A	5.21	5.34	5.66	6.11	6.25	6.42	6.57	6.69	7.01	6.94	1997-01-27	1
1	1	1	1	1	6.91		6.91	6.91	6.91	6.91	6.91	6.91	6.91	6.91	6.91	6.91	6.91	0.907214	1.26743		35458	N/A	5.18	5.3	5.61	6.04	6.19	6.38	6.53	6.64	6.98	6.91	1997-01-28	1
1	1	1	1	1	6.9		6.9	6.9	6.9	6.9	6.9	6.9	6.9	6.9	6.9	6.9	6.9	0.902063	1.26129		35459	N/A	5.18	5.29	5.61	6.04	6.19	6.38	6.52	6.63	6.97	6.9	1997-01-29	1
1	1	1	1	1	6.88		6.88	6.88	6.88	6.88	6.88	6.88	6.88	6.88	6.88	6.88	6.88	0.88951	1.23889		35460	N/A	5.18	5.31	5.63	6.01	6.16	6.35	6.49	6.61	6.95	6.88	1997-01-30	1
1	1	1	1	1	6.8		6.8	6.8	6.8	6.8	6.8	6.8	6.8	6.8	6.8	6.8	6.8	0.869033	1.20506		35461	N/A	5.15	5.28	5.58	5.94	6.08	6.26	6.4	6.53	6.86	6.8	1997-01-31	1
1	1	1	1	1	6.74		6.74	6.74	6.74	6.74	6.74	6.74	6.74	6.74	6.74	6.74	6.74	0.849668	1.17631		35464	N/A	5.12	5.28	5.54	5.89	6.03	6.21	6.34	6.47	6.81	6.74	1997-02-03	1
1	1	1	1	1	6.72		6.72	6.72	6.72	6.72	6.72	6.72	6.72	6.72	6.72	6.72	6.72	0.842259	1.16585		35465	N/A	5.1	5.28	5.54	5.88	6.02	6.19	6.32	6.45	6.78	6.72	1997-02-04	1
1	1	1	1	1	6.75		6.75	6.75	6.75	6.75	6.75	6.75	6.75	6.75	6.75	6.75	6.75	0.853708	1.18147		35466	N/A	5.13	5.28	5.53	5.91	6.04	6.21	6.35	6.47	6.81	6.75	1997-02-05	1
1	1	1	1	1	6.76		6.76	6.76	6.76	6.76	6.76	6.76	6.76	6.76	6.76	6.76	6.76	0.857252	1.18745		35467	N/A	5.14	5.28	5.53	5.91	6.05	6.22	6.36	6.49	6.83	6.76	1997-02-06	1
1	1	1	1	1	6.72		6.72	6.72	6.72	6.72	6.72	6.72	6.72	6.72	6.72	6.72	6.72	0.850086	1.17307		35468	N/A	5.14	5.26	5.49	5.86	6	6.17	6.32	6.43	6.78	6.72	1997-02-07	1
1	1	1	1	1	6.71		6.71	6.71	6.71	6.71	6.71	6.71	6.71	6.71	6.71	6.71	6.71	0.83245	1.14522		35471	N/A	5.17	5.29	5.5	5.87	6	6.16	6.29	6.43	6.77	6.71	1997-02-10	1
1	1	1	1	1	6.71		6.71	6.71	6.71	6.71	6.71	6.71	6.71	6.71	6.71	6.71	6.71	0.833165	1.1502		35472	N/A	5.14	5.28	5.52	5.88	6.01	6.18	6.3	6.43	6.77	6.71	1997-02-11	1
1	1	1	1	1	6.72		6.72	6.72	6.72	6.72	6.72	6.72	6.72	6.72	6.72	6.72	6.72	0.836742	1.15565		35473	N/A	5.16	5.26	5.52	5.9	6.04	6.19	6.31	6.39	6.78	6.72	1997-02-12	1
1	1	1	1	1	6.58		6.58	6.58	6.58	6.58	6.58	6.58	6.58	6.58	6.58	6.58	6.58	0.770938	1.07256		35474	N/A	5.13	5.21	5.48	5.83	5.97	6.12	6.23	6.32	6.69	6.58	1997-02-13	1
1	1	1	1	1	6.53		6.53	6.53	6.53	6.53	6.53	6.53	6.53	6.53	6.53	6.53	6.53	0.762865	1.0591		35475	N/A	5.1	5.17	5.45	5.79	5.91	6.07	6.18	6.28	6.64	6.53	1997-02-14	1
1	1	1	1	1	6.55		6.55	6.55	6.55	6.55	6.55	6.55	6.55	6.55	6.55	6.55	6.55	0.7593	1.04991		35479	N/A	5.12	5.24	5.46	5.8	5.92	6.08	6.19	6.28	6.65	6.55	1997-02-18	1
1	1	1	1	1	6.57		6.57	6.57	6.57	6.57	6.57	6.57	6.57	6.57	6.57	6.57	6.57	0.770956	1.06725		35480	N/A	5.11	5.24	5.46	5.82	5.93	6.1	6.21	6.3	6.67	6.57	1997-02-19	1
1	1	1	1	1	6.64		6.64	6.64	6.64	6.64	6.64	6.64	6.64	6.64	6.64	6.64	6.64	0.805825	1.12306		35481	N/A	5.1	5.23	5.49	5.85	5.99	6.17	6.3	6.38	6.74	6.64	1997-02-20	1
1	1	1	1	1	6.63		6.63	6.63	6.63	6.63	6.63	6.63	6.63	6.63	6.63	6.63	6.63	0.804561	1.11915		35482	N/A	5.09	5.23	5.48	5.85	5.98	6.16	6.27	6.36	6.74	6.63	1997-02-21	1
1	1	1	1	1	6.66		6.66	6.66	6.66	6.66	6.66	6.66	6.66	6.66	6.66	6.66	6.66	0.802066	1.11655		35485	N/A	5.16	5.23	5.5	5.89	6.02	6.19	6.3	6.39	6.76	6.66	1997-02-24	1
1	1	1	1	1	6.66		6.66	6.66	6.66	6.66	6.66	6.66	6.66	6.66	6.66	6.66	6.66	0.799466	1.11665		35486	N/A	5.13	5.24	5.52	5.9	6.04	6.2	6.31	6.4	6.76	6.66	1997-02-25	1
1	1	1	1	1	6.8		6.8	6.8	6.8	6.8	6.8	6.8	6.8	6.8	6.8	6.8	6.8	0.817012	1.15235		35487	N/A	5.22	5.3	5.64	6.06	6.21	6.37	6.48	6.56	6.9	6.8	1997-02-26	1
1	1	1	1	1	6.82		6.82	6.82	6.82	6.82	6.82	6.82	6.82	6.82	6.82	6.82	6.82	0.814298	1.14886		35488	N/A	5.22	5.35	5.66	6.09	6.23	6.4	6.5	6.58	6.92	6.82	1997-02-27	1
1	1	1	1	1	6.8		6.8	6.8	6.8	6.8	6.8	6.8	6.8	6.8	6.8	6.8	6.8	0.793049	1.11942		35489	N/A	5.22	5.39	5.67	6.09	6.23	6.39	6.5	6.56	6.91	6.8	1997-02-28	1
1	1	1	1	1	6.83		6.83	6.83	6.83	6.83	6.83	6.83	6.83	6.83	6.83	6.83	6.83	0.804533	1.13513		35492	N/A	5.24	5.39	5.68	6.11	6.25	6.41	6.53	6.58	6.94	6.83	1997-03-03	1
1	1	1	1	1	6.86		6.86	6.86	6.86	6.86	6.86	6.86	6.86	6.86	6.86	6.86	6.86	0.816428	1.15168		35493	N/A	5.25	5.4	5.7	6.11	6.27	6.44	6.55	6.6	6.97	6.86	1997-03-04	1
1	1	1	1	1	6.85		6.85	6.85	6.85	6.85	6.85	6.85	6.85	6.85	6.85	6.85	6.85	0.812326	1.14728		35494	N/A	5.21	5.41	5.71	6.13	6.27	6.43	6.55	6.6	6.96	6.85	1997-03-05	1
1	1	1	1	1	6.89		6.89	6.89	6.89	6.89	6.89	6.89	6.89	6.89	6.89	6.89	6.89	0.827719	1.16651		35495	N/A	5.23	5.43	5.72	6.15	6.29	6.45	6.58	6.62	6.99	6.89	1997-03-06	1
1	1	1	1	1	6.83		6.83	6.83	6.83	6.83	6.83	6.83	6.83	6.83	6.83	6.83	6.83	0.808821	1.13951		35496	N/A	5.22	5.4	5.68	6.1	6.25	6.39	6.52	6.57	6.93	6.83	1997-03-07	1
1	1	1	1	1	6.83		6.83	6.83	6.83	6.83	6.83	6.83	6.83	6.83	6.83	6.83	6.83	0.809826	1.14119		35499	N/A	5.2	5.4	5.7	6.1	6.25	6.4	6.52	6.56	6.94	6.83	1997-03-10	1
1	1	1	1	1	6.84		6.84	6.84	6.84	6.84	6.84	6.84	6.84	6.84	6.84	6.84	6.84	0.826845	1.16579		35500	N/A	5.18	5.38	5.68	6.09	6.25	6.4	6.53	6.57	6.96	6.84	1997-03-11	1
1	1	1	1	1	6.87		6.87	6.87	6.87	6.87	6.87	6.87	6.87	6.87	6.87	6.87	6.87	0.828981	1.1683		35501	N/A	5.21	5.4	5.71	6.12	6.27	6.43	6.56	6.6	6.98	6.87	1997-03-12	1
1	1	1	1	1	6.98		6.98	6.98	6.98	6.98	6.98	6.98	6.98	6.98	6.98	6.98	6.98	0.857862	1.21496		35502	N/A	5.26	5.45	5.76	6.21	6.38	6.55	6.68	6.72	7.09	6.98	1997-03-13	1
1	1	1	1	1	6.95		6.95	6.95	6.95	6.95	6.95	6.95	6.95	6.95	6.95	6.95	6.95	0.85195	1.2076		35503	N/A	5.24	5.43	5.74	6.18	6.35	6.53	6.66	6.71	7.07	6.95	1997-03-14	1
1	1	1	1	1	6.96		6.96	6.96	6.96	6.96	6.96	6.96	6.96	6.96	6.96	6.96	6.96	0.838765	1.18981		35506	N/A	5.25	5.48	5.77	6.22	6.38	6.55	6.67	6.72	7.08	6.96	1997-03-17	1
1	1	1	1	1	6.96		6.96	6.96	6.96	6.96	6.96	6.96	6.96	6.96	6.96	6.96	6.96	0.838017	1.18981		35507	N/A	5.25	5.48	5.77	6.22	6.38	6.56	6.68	6.72	7.08	6.96	1997-03-18	1
1	1	1	1	1	6.99		6.99	6.99	6.99	6.99	6.99	6.99	6.99	6.99	6.99	6.99	6.99	0.840768	1.19269		35508	N/A	5.29	5.5	5.79	6.24	6.41	6.58	6.7	6.74	7.1	6.99	1997-03-19	1
1	1	1	1	1	6.97		6.97	6.97	6.97	6.97	6.97	6.97	6.97	6.97	6.97	6.97	6.97	0.797644	1.13692		35509	N/A	5.34	5.55	5.83	6.27	6.45	6.61	6.7	6.75	7.09	6.97	1997-03-20	1
1	1	1	1	1	6.96		6.96	6.96	6.96	6.96	6.96	6.96	6.96	6.96	6.96	6.96	6.96	0.762627	1.08579		35510	N/A	5.41	5.59	5.88	6.29	6.46	6.61	6.7	6.74	7.08	6.96	1997-03-21	1
1	1	1	1	1	6.94		6.94	6.94	6.94	6.94	6.94	6.94	6.94	6.94	6.94	6.94	6.94	0.760747	1.08361		35513	N/A	5.4	5.55	5.87	6.29	6.45	6.58	6.69	6.72	7.06	6.94	1997-03-24	1
1	1	1	1	1	6.95		6.95	6.95	6.95	6.95	6.95	6.95	6.95	6.95	6.95	6.95	6.95	0.7385	1.05533		35514	N/A	5.44	5.6	5.91	6.33	6.48	6.63	6.72	6.75	7.07	6.95	1997-03-25	1
1	1	1	1	1	7		7	7	7	7	7	7	7	7	7	7	7	0.775277	1.10959		35515	N/A	5.35	5.59	5.97	6.38	6.52	6.66	6.76	6.8	7.11	7	1997-03-26	1
1	1	1	1	1	7.09		7.09	7.09	7.09	7.09	7.09	7.09	7.09	7.09	7.09	7.09	7.09	0.807048	1.16043		35516	N/A	5.37	5.6	6.02	6.45	6.61	6.76	6.88	6.9	7.2	7.09	1997-03-27	1
1	1	1	1	1	7.1		7.1	7.1	7.1	7.1	7.1	7.1	7.1	7.1	7.1	7.1	7.1	0.825926	1.18776		35520	N/A	5.35	5.55	6.02	6.45	6.6	6.77	6.89	6.92	7.22	7.1	1997-03-31	1
1	1	1	1	1	7.09		7.09	7.09	7.09	7.09	7.09	7.09	7.09	7.09	7.09	7.09	7.09	0.835845	1.20029		35521	N/A	5.32	5.53	6	6.42	6.58	6.74	6.87	6.9	7.21	7.09	1997-04-01	1
1	1	1	1	1	7.08		7.08	7.08	7.08	7.08	7.08	7.08	7.08	7.08	7.08	7.08	7.08	0.836459	1.20137		35522	N/A	5.3	5.53	5.98	6.42	6.58	6.73	6.85	6.88	7.2	7.08	1997-04-02	1
1	1	1	1	1	7.08		7.08	7.08	7.08	7.08	7.08	7.08	7.08	7.08	7.08	7.08	7.08	0.851608	1.22057		35523	N/A	5.27	5.52	5.95	6.4	6.55	6.72	6.84	6.86	7.19	7.08	1997-04-03	1
1	1	1	1	1	7.14		7.14	7.14	7.14	7.14	7.14	7.14	7.14	7.14	7.14	7.14	7.14	0.867761	1.24535		35524	N/A	5.29	5.56	5.98	6.44	6.61	6.78	6.9	6.92	7.25	7.14	1997-04-04	1
1	1	1	1	1	7.08		7.08	7.08	7.08	7.08	7.08	7.08	7.08	7.08	7.08	7.08	7.08	0.843855	1.21114		35527	N/A	5.26	5.55	5.97	6.41	6.57	6.73	6.84	6.87	7.2	7.08	1997-04-07	1
1	1	1	1	1	7.11		7.11	7.11	7.11	7.11	7.11	7.11	7.11	7.11	7.11	7.11	7.11	0.856653	1.2319		35528	N/A	5.25	5.56	5.98	6.44	6.61	6.76	6.87	6.91	7.23	7.11	1997-04-08	1
1	1	1	1	1	7.11		7.11	7.11	7.11	7.11	7.11	7.11	7.11	7.11	7.11	7.11	7.11	0.853538	1.22744		35529	N/A	5.24	5.59	5.98	6.44	6.6	6.77	6.88	6.91	7.22	7.11	1997-04-09	1
1	1	1	1	1	7.11		7.11	7.11	7.11	7.11	7.11	7.11	7.11	7.11	7.11	7.11	7.11	0.835208	1.20078		35530	N/A	5.29	5.62	5.99	6.46	6.61	6.78	6.88	6.91	7.22	7.11	1997-04-10	1
1	1	1	1	1	7.17		7.17	7.17	7.17	7.17	7.17	7.17	7.17	7.17	7.17	7.17	7.17	0.845195	1.2187		35531	N/A	5.31	5.66	6.04	6.53	6.69	6.85	6.95	6.98	7.29	7.17	1997-04-11	1
1	1	1	1	1	7.17		7.17	7.17	7.17	7.17	7.17	7.17	7.17	7.17	7.17	7.17	7.17	0.853879	1.23323		35534	N/A	5.3	5.61	6.04	6.54	6.7	6.86	6.95	6.98	7.29	7.17	1997-04-14	1
1	1	1	1	1	7.1		7.1	7.1	7.1	7.1	7.1	7.1	7.1	7.1	7.1	7.1	7.1	0.826191	1.18736		35535	N/A	5.31	5.62	5.99	6.45	6.62	6.76	6.87	6.88	7.21	7.1	1997-04-15	1
1	1	1	1	1	7.11		7.11	7.11	7.11	7.11	7.11	7.11	7.11	7.11	7.11	7.11	7.11	0.829786	1.19512		35536	N/A	5.29	5.63	5.99	6.49	6.64	6.79	6.88	6.9	7.22	7.11	1997-04-16	1
1	1	1	1	1	7.07		7.07	7.07	7.07	7.07	7.07	7.07	7.07	7.07	7.07	7.07	7.07	0.813226	1.16981		35537	N/A	5.29	5.64	5.96	6.44	6.6	6.75	6.84	6.86	7.18	7.07	1997-04-17	1
1	1	1	1	1	7.06		7.06	7.06	7.06	7.06	7.06	7.06	7.06	7.06	7.06	7.06	7.06	0.815408	1.16977		35538	N/A	5.29	5.63	5.94	6.42	6.57	6.73	6.81	6.84	7.17	7.06	1997-04-18	1
1	1	1	1	1	7.09		7.09	7.09	7.09	7.09	7.09	7.09	7.09	7.09	7.09	7.09	7.09	0.814192	1.16915		35541	N/A	5.36	5.61	5.97	6.46	6.61	6.76	6.85	6.87	7.2	7.09	1997-04-21	1
1	1	1	1	1	7.05		7.05	7.05	7.05	7.05	7.05	7.05	7.05	7.05	7.05	7.05	7.05	0.795801	1.14355		35542	N/A	5.36	5.59	5.97	6.43	6.59	6.73	6.81	6.84	7.16	7.05	1997-04-22	1
1	1	1	1	1	7.09		7.09	7.09	7.09	7.09	7.09	7.09	7.09	7.09	7.09	7.09	7.09	0.803656	1.15688		35543	N/A	5.37	5.62	6	6.47	6.63	6.78	6.86	6.89	7.2	7.09	1997-04-23	1
1	1	1	1	1	7.13		7.13	7.13	7.13	7.13	7.13	7.13	7.13	7.13	7.13	7.13	7.13	0.823032	1.18866		35544	N/A	5.32	5.63	6.05	6.52	6.68	6.83	6.92	6.93	7.23	7.13	1997-04-24	1
1	1	1	1	1	7.14		7.14	7.14	7.14	7.14	7.14	7.14	7.14	7.14	7.14	7.14	7.14	0.822568	1.18765		35545	N/A	5.31	5.65	6.08	6.54	6.7	6.83	6.92	6.94	7.25	7.14	1997-04-25	1
1	1	1	1	1	7.12		7.12	7.12	7.12	7.12	7.12	7.12	7.12	7.12	7.12	7.12	7.12	0.80399	1.15777		35548	N/A	5.35	5.68	6.06	6.51	6.66	6.81	6.9	6.92	7.23	7.12	1997-04-28	1
1	1	1	1	1	6.99		6.99	6.99	6.99	6.99	6.99	6.99	6.99	6.99	6.99	6.99	6.99	0.792579	1.13327		35549	N/A	5.34	5.53	5.92	6.34	6.49	6.64	6.75	6.77	7.09	6.99	1997-04-29	1
1	1	1	1	1	6.95		6.95	6.95	6.95	6.95	6.95	6.95	6.95	6.95	6.95	6.95	6.95	0.792264	1.12636		35550	N/A	5.28	5.53	5.9	6.29	6.42	6.57	6.68	6.72	7.05	6.95	1997-04-30	1
1	1	1	1	1	6.93		6.93	6.93	6.93	6.93	6.93	6.93	6.93	6.93	6.93	6.93	6.93	0.788358	1.12051		35551	N/A	5.24	5.55	5.89	6.27	6.41	6.55	6.65	6.69	7.02	6.93	1997-05-01	1
1	1	1	1	1	6.9		6.9	6.9	6.9	6.9	6.9	6.9	6.9	6.9	6.9	6.9	6.9	0.769309	1.09555		35552	N/A	5.24	5.56	5.88	6.26	6.4	6.54	6.63	6.68	6.99	6.9	1997-05-02	1
1	1	1	1	1	6.9		6.9	6.9	6.9	6.9	6.9	6.9	6.9	6.9	6.9	6.9	6.9	0.76987	1.09691		35555	N/A	5.22	5.57	5.88	6.28	6.41	6.54	6.63	6.67	6.99	6.9	1997-05-05	1
1	1	1	1	1	6.89		6.89	6.89	6.89	6.89	6.89	6.89	6.89	6.89	6.89	6.89	6.89	0.758917	1.0819		35556	N/A	5.21	5.59	5.9	6.29	6.39	6.56	6.63	6.67	6.98	6.89	1997-05-06	1
1	1	1	1	1	6.96		6.96	6.96	6.96	6.96	6.96	6.96	6.96	6.96	6.96	6.96	6.96	0.78375	1.12604		35557	N/A	5.22	5.57	5.95	6.36	6.51	6.63	6.72	6.76	7.05	6.96	1997-05-07	1
1	1	1	1	1	6.92		6.92	6.92	6.92	6.92	6.92	6.92	6.92	6.92	6.92	6.92	6.92	0.771439	1.10718		35558	N/A	5.21	5.55	5.93	6.33	6.47	6.59	6.68	6.72	7.01	6.92	1997-05-08	1
1	1	1	1	1	6.89		6.89	6.89	6.89	6.89	6.89	6.89	6.89	6.89	6.89	6.89	6.89	0.790495	1.12796		35559	N/A	5.19	5.48	5.86	6.24	6.4	6.51	6.62	6.67	6.97	6.89	1997-05-09	1
1	1	1	1	1	6.88		6.88	6.88	6.88	6.88	6.88	6.88	6.88	6.88	6.88	6.88	6.88	0.767765	1.09013		35562	N/A	5.24	5.55	5.85	6.23	6.37	6.5	6.6	6.65	6.96	6.88	1997-05-12	1
1	1	1	1	1	6.92		6.92	6.92	6.92	6.92	6.92	6.92	6.92	6.92	6.92	6.92	6.92	0.775347	1.11043		35563	N/A	5.24	5.55	5.88	6.3	6.44	6.6	6.67	6.71	7.01	6.92	1997-05-13	1
1	1	1	1	1	6.9		6.9	6.9	6.9	6.9	6.9	6.9	6.9	6.9	6.9	6.9	6.9	0.786927	1.12425		35564	N/A	5.19	5.52	5.86	6.26	6.41	6.54	6.64	6.68	6.98	6.9	1997-05-14	1
1	1	1	1	1	6.88		6.88	6.88	6.88	6.88	6.88	6.88	6.88	6.88	6.88	6.88	6.88	0.787961	1.12575		35565	N/A	5.13	5.54	5.84	6.25	6.39	6.52	6.61	6.67	6.96	6.88	1997-05-15	1
1	1	1	1	1	6.91		6.91	6.91	6.91	6.91	6.91	6.91	6.91	6.91	6.91	6.91	6.91	0.780612	1.11339		35566	N/A	5.2	5.57	5.87	6.28	6.41	6.55	6.64	6.7	7	6.91	1997-05-16	1
1	1	1	1	1	6.92		6.92	6.92	6.92	6.92	6.92	6.92	6.92	6.92	6.92	6.92	6.92	0.739945	1.05187		35569	N/A	5.38	5.62	5.89	6.28	6.42	6.57	6.66	6.71	7	6.92	1997-05-19	1
1	1	1	1	1	6.92		6.92	6.92	6.92	6.92	6.92	6.92	6.92	6.92	6.92	6.92	6.92	0.766319	1.0872		35570	N/A	5.39	5.53	5.83	6.25	6.4	6.54	6.64	6.7	7.01	6.92	1997-05-20	1
1	1	1	1	1	6.97		6.97	6.97	6.97	6.97	6.97	6.97	6.97	6.97	6.97	6.97	6.97	0.857231	1.22044		35571	N/A	5.12	5.5	5.81	6.25	6.4	6.57	6.67	6.74	7.06	6.97	1997-05-21	1
1	1	1	1	1	7		7	7	7	7	7	7	7	7	7	7	7	0.857528	1.22173		35572	N/A	5.18	5.47	5.87	6.27	6.44	6.61	6.69	6.76	7.08	7	1997-05-22	1
1	1	1	1	1	6.99		6.99	6.99	6.99	6.99	6.99	6.99	6.99	6.99	6.99	6.99	6.99	0.859471	1.22182		35573	N/A	5.18	5.46	5.85	6.25	6.41	6.59	6.68	6.74	7.07	6.99	1997-05-23	1
1	1	1	1	1	7.03		7.03	7.03	7.03	7.03	7.03	7.03	7.03	7.03	7.03	7.03	7.03	0.864307	1.23255		35577	N/A	5.18	5.5	5.89	6.3	6.47	6.64	6.73	6.79	7.12	7.03	1997-05-27	1
1	1	1	1	1	7.03		7.03	7.03	7.03	7.03	7.03	7.03	7.03	7.03	7.03	7.03	7.03	0.860539	1.22927		35578	N/A	5.18	5.48	5.91	6.34	6.48	6.65	6.74	6.8	7.11	7.03	1997-05-28	1
1	1	1	1	1	6.99		6.99	6.99	6.99	6.99	6.99	6.99	6.99	6.99	6.99	6.99	6.99	0.882641	1.26342		35579	N/A	5.03	5.46	5.84	6.3	6.45	6.61	6.69	6.75	7.06	6.99	1997-05-29	1
1	1	1	1	1	6.92		6.92	6.92	6.92	6.92	6.92	6.92	6.92	6.92	6.92	6.92	6.92	0.873702	1.24602		35580	N/A	4.96	5.46	5.78	6.22	6.37	6.51	6.61	6.67	6.99	6.92	1997-05-30	1
1	1	1	1	1	6.9		6.9	6.9	6.9	6.9	6.9	6.9	6.9	6.9	6.9	6.9	6.9	0.844162	1.20354		35583	N/A	5.07	5.42	5.78	6.23	6.36	6.52	6.59	6.66	6.98	6.9	1997-06-02	1
1	1	1	1	1	6.88		6.88	6.88	6.88	6.88	6.88	6.88	6.88	6.88	6.88	6.88	6.88	0.845141	1.20281		35584	N/A	5.05	5.4	5.77	6.2	6.33	6.49	6.56	6.63	6.94	6.88	1997-06-03	1
1	1	1	1	1	6.88		6.88	6.88	6.88	6.88	6.88	6.88	6.88	6.88	6.88	6.88	6.88	0.837665	1.19071		35585	N/A	5.09	5.4	5.77	6.2	6.33	6.49	6.56	6.62	6.95	6.88	1997-06-04	1
1	1	1	1	1	6.88		6.88	6.88	6.88	6.88	6.88	6.88	6.88	6.88	6.88	6.88	6.88	0.833056	1.18411		35586	N/A	5.11	5.41	5.76	6.2	6.33	6.49	6.57	6.62	6.95	6.88	1997-06-05	1
1	1	1	1	1	6.78		6.78	6.78	6.78	6.78	6.78	6.78	6.78	6.78	6.78	6.78	6.78	0.802145	1.13707		35587	N/A	5.07	5.38	5.71	6.12	6.25	6.39	6.46	6.51	6.85	6.78	1997-06-06	1
1	1	1	1	1	6.83		6.83	6.83	6.83	6.83	6.83	6.83	6.83	6.83	6.83	6.83	6.83	0.821019	1.16676		35590	N/A	5.06	5.4	5.75	6.15	6.31	6.44	6.51	6.55	6.9	6.83	1997-06-09	1
1	1	1	1	1	6.84		6.84	6.84	6.84	6.84	6.84	6.84	6.84	6.84	6.84	6.84	6.84	0.823992	1.17354		35591	N/A	5.05	5.41	5.75	6.17	6.32	6.46	6.54	6.57	6.91	6.84	1997-06-10	1
1	1	1	1	1	6.83		6.83	6.83	6.83	6.83	6.83	6.83	6.83	6.83	6.83	6.83	6.83	0.832401	1.18688		35592	N/A	4.98	5.4	5.75	6.19	6.32	6.45	6.52	6.56	6.9	6.83	1997-06-11	1
1	1	1	1	1	6.77		6.77	6.77	6.77	6.77	6.77	6.77	6.77	6.77	6.77	6.77	6.77	0.832433	1.17767		35593	N/A	4.97	5.35	5.68	6.07	6.21	6.35	6.44	6.48	6.84	6.77	1997-06-12	1
1	1	1	1	1	6.73		6.73	6.73	6.73	6.73	6.73	6.73	6.73	6.73	6.73	6.73	6.73	0.81341	1.14729		35594	N/A	5	5.34	5.65	6.03	6.18	6.3	6.39	6.43	6.79	6.73	1997-06-13	1
1	1	1	1	1	6.7		6.7	6.7	6.7	6.7	6.7	6.7	6.7	6.7	6.7	6.7	6.7	0.79708	1.12373		35597	N/A	5.03	5.3	5.65	6.02	6.15	6.28	6.38	6.4	6.76	6.7	1997-06-16	1
1	1	1	1	1	6.72		6.72	6.72	6.72	6.72	6.72	6.72	6.72	6.72	6.72	6.72	6.72	0.798054	1.1269		35598	N/A	5.05	5.31	5.66	6.05	6.18	6.31	6.39	6.43	6.78	6.72	1997-06-17	1
1	1	1	1	1	6.69		6.69	6.69	6.69	6.69	6.69	6.69	6.69	6.69	6.69	6.69	6.69	0.787083	1.11333		35599	N/A	5.03	5.3	5.66	6.02	6.17	6.29	6.38	6.4	6.77	6.69	1997-06-18	1
1	1	1	1	1	6.68		6.68	6.68	6.68	6.68	6.68	6.68	6.68	6.68	6.68	6.68	6.68	0.768375	1.08696		35600	N/A	5.08	5.31	5.65	6.04	6.17	6.29	6.38	6.4	6.76	6.68	1997-06-19	1
1	1	1	1	1	6.65		6.65	6.65	6.65	6.65	6.65	6.65	6.65	6.65	6.65	6.65	6.65	0.754622	1.0675		35601	N/A	5.08	5.31	5.63	6.02	6.14	6.27	6.37	6.37	6.72	6.65	1997-06-20	1
1	1	1	1	1	6.69		6.69	6.69	6.69	6.69	6.69	6.69	6.69	6.69	6.69	6.69	6.69	0.784544	1.10966		35604	N/A	5.06	5.27	5.66	6.04	6.17	6.3	6.37	6.4	6.76	6.69	1997-06-23	1
1	1	1	1	1	6.7		6.7	6.7	6.7	6.7	6.7	6.7	6.7	6.7	6.7	6.7	6.7	0.786864	1.11389		35605	N/A	5.07	5.28	5.66	6.03	6.18	6.31	6.38	6.42	6.76	6.7	1997-06-24	1
1	1	1	1	1	6.74		6.74	6.74	6.74	6.74	6.74	6.74	6.74	6.74	6.74	6.74	6.74	0.811312	1.14894		35606	N/A	5.07	5.26	5.67	6.05	6.19	6.34	6.44	6.45	6.8	6.74	1997-06-25	1
1	1	1	1	1	6.78		6.78	6.78	6.78	6.78	6.78	6.78	6.78	6.78	6.78	6.78	6.78	0.820576	1.16257		35607	N/A	5.17	5.26	5.63	6.05	6.24	6.36	6.47	6.5	6.86	6.78	1997-06-26	1
1	1	1	1	1	6.75		6.75	6.75	6.75	6.75	6.75	6.75	6.75	6.75	6.75	6.75	6.75	0.810684	1.14677		35608	N/A	5.15	5.26	5.62	6.03	6.2	6.35	6.43	6.46	6.82	6.75	1997-06-27	1
1	1	1	1	1	6.8		6.8	6.8	6.8	6.8	6.8	6.8	6.8	6.8	6.8	6.8	6.8	0.796338	1.12511		35611	N/A	5.25	5.34	5.67	6.08	6.25	6.4	6.49	6.51	6.86	6.8	1997-06-30	1
1	1	1	1	1	6.74		6.74	6.74	6.74	6.74	6.74	6.74	6.74	6.74	6.74	6.74	6.74	0.790144	1.11417		35612	N/A	5.18	5.31	5.64	6.02	6.19	6.33	6.42	6.45	6.8	6.74	1997-07-01	1
1	1	1	1	1	6.72		6.72	6.72	6.72	6.72	6.72	6.72	6.72	6.72	6.72	6.72	6.72	0.773058	1.08618		35613	N/A	5.2	5.33	5.64	6.02	6.17	6.3	6.4	6.42	6.78	6.72	1997-07-02	1
1	1	1	1	1	6.63		6.63	6.63	6.63	6.63	6.63	6.63	6.63	6.63	6.63	6.63	6.63	0.764478	1.0687		35614	N/A	5.14	5.26	5.57	5.93	6.07	6.2	6.29	6.31	6.67	6.63	1997-07-03	1
1	1	1	1	1	6.58		6.58	6.58	6.58	6.58	6.58	6.58	6.58	6.58	6.58	6.58	6.58	0.737243	1.03132		35618	N/A	5.12	5.28	5.55	5.92	6.04	6.17	6.26	6.27	6.63	6.58	1997-07-07	1
1	1	1	1	1	6.59		6.59	6.59	6.59	6.59	6.59	6.59	6.59	6.59	6.59	6.59	6.59	0.740786	1.03494		35619	N/A	5.12	5.3	5.55	5.92	6.05	6.17	6.26	6.27	6.63	6.59	1997-07-08	1
1	1	1	1	1	6.56		6.56	6.56	6.56	6.56	6.56	6.56	6.56	6.56	6.56	6.56	6.56	0.729439	1.01849		35620	N/A	5.11	5.3	5.53	5.9	6.02	6.15	6.23	6.25	6.6	6.56	1997-07-09	1
1	1	1	1	1	6.56		6.56	6.56	6.56	6.56	6.56	6.56	6.56	6.56	6.56	6.56	6.56	0.717553	1.00091		35621	N/A	5.15	5.32	5.53	5.91	6.02	6.15	6.24	6.26	6.61	6.56	1997-07-10	1
1	1	1	1	1	6.53		6.53	6.53	6.53	6.53	6.53	6.53	6.53	6.53	6.53	6.53	6.53	0.705124	0.984906		35622	N/A	5.14	5.31	5.52	5.89	6.01	6.13	6.22	6.23	6.58	6.53	1997-07-11	1
1	1	1	1	1	6.55		6.55	6.55	6.55	6.55	6.55	6.55	6.55	6.55	6.55	6.55	6.55	0.687247	0.960156		35625	N/A	5.22	5.33	5.56	5.94	6.05	6.16	6.24	6.26	6.61	6.55	1997-07-14	1
1	1	1	1	1	6.55		6.55	6.55	6.55	6.55	6.55	6.55	6.55	6.55	6.55	6.55	6.55	0.690026	0.965277		35626	N/A	5.22	5.32	5.56	5.92	6.05	6.16	6.25	6.26	6.6	6.55	1997-07-15	1
1	1	1	1	1	6.48		6.48	6.48	6.48	6.48	6.48	6.48	6.48	6.48	6.48	6.48	6.48	0.669036	0.935382		35627	N/A	5.17	5.32	5.51	5.87	5.99	6.11	6.18	6.2	6.54	6.48	1997-07-16	1
1	1	1	1	1	6.49		6.49	6.49	6.49	6.49	6.49	6.49	6.49	6.49	6.49	6.49	6.49	0.665753	0.926553		35628	N/A	5.18	5.33	5.57	5.87	5.99	6.11	6.18	6.19	6.54	6.49	1997-07-17	1
1	1	1	1	1	6.52		6.52	6.52	6.52	6.52	6.52	6.52	6.52	6.52	6.52	6.52	6.52	0.658283	0.918804		35629	N/A	5.24	5.36	5.59	5.91	6.02	6.16	6.23	6.24	6.58	6.52	1997-07-18	1
1	1	1	1	1	6.55		6.55	6.55	6.55	6.55	6.55	6.55	6.55	6.55	6.55	6.55	6.55	0.660482	0.920837		35632	N/A	5.27	5.39	5.61	5.94	6.05	6.18	6.25	6.27	6.61	6.55	1997-07-21	1
1	1	1	1	1	6.43		6.43	6.43	6.43	6.43	6.43	6.43	6.43	6.43	6.43	6.43	6.43	0.629531	0.873659		35633	N/A	5.18	5.36	5.52	5.9	5.94	6.07	6.13	6.15	6.5	6.43	1997-07-22	1
1	1	1	1	1	6.42		6.42	6.42	6.42	6.42	6.42	6.42	6.42	6.42	6.42	6.42	6.42	0.625685	0.870597		35634	N/A	5.2	5.34	5.52	5.85	5.95	6.06	6.13	6.14	6.48	6.42	1997-07-23	1
1	1	1	1	1	6.43		6.43	6.43	6.43	6.43	6.43	6.43	6.43	6.43	6.43	6.43	6.43	0.62391	0.865806		35635	N/A	5.23	5.35	5.52	5.87	5.95	6.06	6.13	6.16	6.49	6.43	1997-07-24	1
1	1	1	1	1	6.45		6.45	6.45	6.45	6.45	6.45	6.45	6.45	6.45	6.45	6.45	6.45	0.629784	0.875785		35636	N/A	5.24	5.36	5.53	5.87	5.97	6.08	6.16	6.18	6.51	6.45	1997-07-25	1
1	1	1	1	1	6.43		6.43	6.43	6.43	6.43	6.43	6.43	6.43	6.43	6.43	6.43	6.43	0.61873	0.859383		35639	N/A	5.24	5.37	5.52	5.86	5.96	6.06	6.14	6.16	6.49	6.43	1997-07-28	1
1	1	1	1	1	6.38		6.38	6.38	6.38	6.38	6.38	6.38	6.38	6.38	6.38	6.38	6.38	0.611793	0.843493		35640	N/A	5.24	5.34	5.47	5.79	5.88	6	6.08	6.11	6.43	6.38	1997-07-29	1
1	1	1	1	1	6.33		6.33	6.33	6.33	6.33	6.33	6.33	6.33	6.33	6.33	6.33	6.33	0.587506	0.806226		35641	N/A	5.24	5.34	5.46	5.76	5.85	5.95	6.03	6.05	6.39	6.33	1997-07-30	1
1	1	1	1	1	6.3		6.3	6.3	6.3	6.3	6.3	6.3	6.3	6.3	6.3	6.3	6.3	0.576557	0.784793		35642	N/A	5.25	5.33	5.45	5.74	5.81	5.9	5.99	6.02	6.35	6.3	1997-07-31	1
1	1	1	1	1	6.46		6.46	6.46	6.46	6.46	6.46	6.46	6.46	6.46	6.46	6.46	6.46	0.621223	0.863076		35643	N/A	5.28	5.4	5.52	5.89	5.99	6.08	6.17	6.2	6.52	6.46	1997-08-01	1
1	1	1	1	1	6.48		6.48	6.48	6.48	6.48	6.48	6.48	6.48	6.48	6.48	6.48	6.48	0.623341	0.870448		35646	N/A	5.29	5.41	5.53	5.91	6.02	6.12	6.2	6.23	6.54	6.48	1997-08-04	1
1	1	1	1	1	6.49		6.49	6.49	6.49	6.49	6.49	6.49	6.49	6.49	6.49	6.49	6.49	0.62063	0.867272		35647	N/A	5.29	5.43	5.55	5.93	6.04	6.13	6.22	6.23	6.55	6.49	1997-08-05	1
1	1	1	1	1	6.48		6.48	6.48	6.48	6.48	6.48	6.48	6.48	6.48	6.48	6.48	6.48	0.620791	0.865563		35648	N/A	5.29	5.43	5.53	5.91	6.03	6.11	6.2	6.21	6.53	6.48	1997-08-06	1
1	1	1	1	1	6.51		6.51	6.51	6.51	6.51	6.51	6.51	6.51	6.51	6.51	6.51	6.51	0.629877	0.879204		35649	N/A	5.3	5.45	5.54	5.93	6.05	6.14	6.24	6.24	6.58	6.51	1997-08-07	1
1	1	1	1	1	6.64		6.64	6.64	6.64	6.64	6.64	6.64	6.64	6.64	6.64	6.64	6.64	0.691724	0.97001		35650	N/A	5.29	5.45	5.6	6.02	6.15	6.23	6.37	6.38	6.74	6.64	1997-08-08	1
1	1	1	1	1	6.64		6.64	6.64	6.64	6.64	6.64	6.64	6.64	6.64	6.64	6.64	6.64	0.690862	0.96204		35653	N/A	5.31	5.45	5.63	5.99	6.13	6.2	6.35	6.36	6.72	6.64	1997-08-11	1
1	1	1	1	1	6.66		6.66	6.66	6.66	6.66	6.66	6.66	6.66	6.66	6.66	6.66	6.66	0.699149	0.975602		35654	N/A	5.31	5.46	5.63	6	6.14	6.22	6.39	6.39	6.75	6.66	1997-08-12	1
1	1	1	1	1	6.64		6.64	6.64	6.64	6.64	6.64	6.64	6.64	6.64	6.64	6.64	6.64	0.702748	0.976135		35655	N/A	5.32	5.43	5.6	5.95	6.09	6.19	6.36	6.36	6.72	6.64	1997-08-13	1
1	1	1	1	1	6.56		6.56	6.56	6.56	6.56	6.56	6.56	6.56	6.56	6.56	6.56	6.56	0.661939	0.914079		35656	N/A	5.34	5.42	5.57	5.92	6.03	6.13	6.27	6.27	6.65	6.56	1997-08-14	1
1	1	1	1	1	6.57		6.57	6.57	6.57	6.57	6.57	6.57	6.57	6.57	6.57	6.57	6.57	0.697939	0.961884		35657	N/A	5.29	5.38	5.53	5.87	6	6.1	6.27	6.27	6.65	6.57	1997-08-15	1
1	1	1	1	1	6.53		6.53	6.53	6.53	6.53	6.53	6.53	6.53	6.53	6.53	6.53	6.53	0.70234	0.964095		35660	N/A	5.23	5.35	5.5	5.82	5.94	6.06	6.21	6.21	6.6	6.53	1997-08-18	1
1	1	1	1	1	6.51		6.51	6.51	6.51	6.51	6.51	6.51	6.51	6.51	6.51	6.51	6.51	0.676918	0.934751		35661	N/A	5.25	5.35	5.51	5.85	5.97	6.07	6.21	6.21	6.59	6.51	1997-08-19	1
1	1	1	1	1	6.54		6.54	6.54	6.54	6.54	6.54	6.54	6.54	6.54	6.54	6.54	6.54	0.688094	0.952691		35662	N/A	5.24	5.36	5.53	5.88	6	6.1	6.24	6.24	6.61	6.54	1997-08-20	1
1	1	1	1	1	6.6		6.6	6.6	6.6	6.6	6.6	6.6	6.6	6.6	6.6	6.6	6.6	0.704311	0.976238		35663	N/A	5.27	5.37	5.57	5.95	6.05	6.15	6.3	6.3	6.68	6.6	1997-08-21	1
1	1	1	1	1	6.67		6.67	6.67	6.67	6.67	6.67	6.67	6.67	6.67	6.67	6.67	6.67	0.75112	1.04608		35664	N/A	5.25	5.34	5.57	5.98	6.09	6.21	6.36	6.38	6.75	6.67	1997-08-22	1
1	1	1	1	1	6.67		6.67	6.67	6.67	6.67	6.67	6.67	6.67	6.67	6.67	6.67	6.67	0.72606	1.01499		35667	N/A	5.28	5.39	5.6	6.01	6.12	6.25	6.38	6.39	6.75	6.67	1997-08-25	1
1	1	1	1	1	6.66		6.66	6.66	6.66	6.66	6.66	6.66	6.66	6.66	6.66	6.66	6.66	0.721532	1.00894		35668	N/A	5.28	5.39	5.6	5.99	6.12	6.24	6.37	6.38	6.74	6.66	1997-08-26	1
1	1	1	1	1	6.66		6.66	6.66	6.66	6.66	6.66	6.66	6.66	6.66	6.66	6.66	6.66	0.718129	1.0038		35669	N/A	5.28	5.4	5.6	6.01	6.13	6.23	6.37	6.38	6.74	6.66	1997-08-27	1
1	1	1	1	1	6.57		6.57	6.57	6.57	6.57	6.57	6.57	6.57	6.57	6.57	6.57	6.57	0.685592	0.959375		35670	N/A	5.24	5.38	5.56	5.94	6.06	6.18	6.29	6.3	6.64	6.57	1997-08-28	1
1	1	1	1	1	6.61		6.61	6.61	6.61	6.61	6.61	6.61	6.61	6.61	6.61	6.61	6.61	0.699688	0.981356		35671	N/A	5.24	5.39	5.59	5.97	6.1	6.22	6.33	6.34	6.69	6.61	1997-08-29	1
1	1	1	1	1	6.58		6.58	6.58	6.58	6.58	6.58	6.58	6.58	6.58	6.58	6.58	6.58	0.693719	0.971874		35675	N/A	5.21	5.39	5.57	5.94	6.06	6.2	6.3	6.31	6.65	6.58	1997-09-02	1
1	1	1	1	1	6.6		6.6	6.6	6.6	6.6	6.6	6.6	6.6	6.6	6.6	6.6	6.6	0.718217	1.00901		35676	N/A	5.14	5.38	5.57	5.96	6.07	6.21	6.33	6.33	6.67	6.6	1997-09-03	1
1	1	1	1	1	6.61		6.61	6.61	6.61	6.61	6.61	6.61	6.61	6.61	6.61	6.61	6.61	0.718186	1.00904		35677	N/A	5.14	5.38	5.6	5.98	6.09	6.22	6.33	6.33	6.67	6.61	1997-09-04	1
1	1	1	1	1	6.65		6.65	6.65	6.65	6.65	6.65	6.65	6.65	6.65	6.65	6.65	6.65	0.741387	1.03895		35678	N/A	5.17	5.38	5.58	5.98	6.09	6.24	6.36	6.37	6.72	6.65	1997-09-05	1
1	1	1	1	1	6.62		6.62	6.62	6.62	6.62	6.62	6.62	6.62	6.62	6.62	6.62	6.62	0.721652	1.0123		35681	N/A	5.16	5.37	5.61	5.98	6.09	6.23	6.33	6.33	6.68	6.62	1997-09-08	1
1	1	1	1	1	6.63		6.63	6.63	6.63	6.63	6.63	6.63	6.63	6.63	6.63	6.63	6.63	0.732704	1.02788		35682	N/A	5.16	5.35	5.6	5.98	6.09	6.24	6.33	6.34	6.7	6.63	1997-09-09	1
1	1	1	1	1	6.66		6.66	6.66	6.66	6.66	6.66	6.66	6.66	6.66	6.66	6.66	6.66	0.757202	1.06364		35683	N/A	5.11	5.35	5.61	6	6.1	6.26	6.36	6.37	6.71	6.66	1997-09-10	1
1	1	1	1	1	6.68		6.68	6.68	6.68	6.68	6.68	6.68	6.68	6.68	6.68	6.68	6.68	0.766776	1.07661		35684	N/A	5.13	5.36	5.59	6	6.11	6.27	6.38	6.39	6.75	6.68	1997-09-11	1
1	1	1	1	1	6.59		6.59	6.59	6.59	6.59	6.59	6.59	6.59	6.59	6.59	6.59	6.59	0.741749	1.03645		35685	N/A	5.1	5.32	5.54	5.93	6.03	6.17	6.28	6.29	6.66	6.59	1997-09-12	1
1	1	1	1	1	6.58		6.58	6.58	6.58	6.58	6.58	6.58	6.58	6.58	6.58	6.58	6.58	0.740614	1.03605		35688	N/A	5.08	5.31	5.54	5.93	6.02	6.17	6.28	6.28	6.65	6.58	1997-09-15	1
1	1	1	1	1	6.41		6.41	6.41	6.41	6.41	6.41	6.41	6.41	6.41	6.41	6.41	6.41	0.667962	0.923353		35689	N/A	5.09	5.28	5.47	5.81	5.88	6	6.09	6.11	6.47	6.41	1997-09-16	1
1	1	1	1	1	6.39		6.39	6.39	6.39	6.39	6.39	6.39	6.39	6.39	6.39	6.39	6.39	0.653863	0.905428		35690	N/A	5.1	5.29	5.46	5.79	5.88	5.99	6.08	6.1	6.45	6.39	1997-09-17	1
1	1	1	1	1	6.4		6.4	6.4	6.4	6.4	6.4	6.4	6.4	6.4	6.4	6.4	6.4	0.657267	0.914319		35691	N/A	5.1	5.27	5.47	5.81	5.9	6.02	6.1	6.11	6.46	6.4	1997-09-18	1
1	1	1	1	1	6.38		6.38	6.38	6.38	6.38	6.38	6.38	6.38	6.38	6.38	6.38	6.38	0.65116	0.906576		35692	N/A	5.06	5.27	5.48	5.81	5.89	6.01	6.08	6.09	6.44	6.38	1997-09-19	1
1	1	1	1	1	6.35		6.35	6.35	6.35	6.35	6.35	6.35	6.35	6.35	6.35	6.35	6.35	0.653585	0.911208		35695	N/A	5.02	5.22	5.46	5.79	5.86	5.99	6.05	6.06	6.41	6.35	1997-09-22	1
1	1	1	1	1	6.38		6.38	6.38	6.38	6.38	6.38	6.38	6.38	6.38	6.38	6.38	6.38	0.667471	0.934334		35696	N/A	5.02	5.21	5.48	5.8	5.89	6.02	6.09	6.1	6.44	6.38	1997-09-23	1
1	1	1	1	1	6.32		6.32	6.32	6.32	6.32	6.32	6.32	6.32	6.32	6.32	6.32	6.32	0.660509	0.927847		35697	N/A	4.94	5.15	5.46	5.78	5.86	5.97	6.04	6.04	6.38	6.32	1997-09-24	1
1	1	1	1	1	6.4		6.4	6.4	6.4	6.4	6.4	6.4	6.4	6.4	6.4	6.4	6.4	0.693312	0.978397		35698	N/A	4.93	5.17	5.5	5.85	5.93	6.04	6.13	6.13	6.47	6.4	1997-09-25	1
1	1	1	1	1	6.37		6.37	6.37	6.37	6.37	6.37	6.37	6.37	6.37	6.37	6.37	6.37	0.674335	0.94397		35699	N/A	4.99	5.18	5.47	5.8	5.89	5.99	6.08	6.08	6.43	6.37	1997-09-26	1
1	1	1	1	1	6.39		6.39	6.39	6.39	6.39	6.39	6.39	6.39	6.39	6.39	6.39	6.39	0.655168	0.908295		35702	N/A	5.07	5.3	5.47	5.8	5.88	5.99	6.09	6.1	6.44	6.39	1997-09-29	1
1	1	1	1	1	6.41		6.41	6.41	6.41	6.41	6.41	6.41	6.41	6.41	6.41	6.41	6.41	0.672972	0.933285		35703	N/A	5.06	5.28	5.47	5.8	5.88	6	6.11	6.12	6.47	6.41	1997-09-30	1
1	1	1	1	1	6.33		6.33	6.33	6.33	6.33	6.33	6.33	6.33	6.33	6.33	6.33	6.33	0.628129	0.867756		35704	N/A	5.1	5.27	5.44	5.75	5.83	5.93	6.05	6.04	6.38	6.33	1997-10-01	1
1	1	1	1	1	6.31		6.31	6.31	6.31	6.31	6.31	6.31	6.31	6.31	6.31	6.31	6.31	0.628938	0.866545		35705	N/A	5.07	5.25	5.44	5.73	5.8	5.91	6.02	6.01	6.36	6.31	1997-10-02	1
1	1	1	1	1	6.3		6.3	6.3	6.3	6.3	6.3	6.3	6.3	6.3	6.3	6.3	6.3	0.638414	0.882054		35706	N/A	5.03	5.22	5.42	5.72	5.79	5.89	6.02	6.01	6.35	6.3	1997-10-03	1
1	1	1	1	1	6.27		6.27	6.27	6.27	6.27	6.27	6.27	6.27	6.27	6.27	6.27	6.27	0.622174	0.851305		35709	N/A	5.08	5.22	5.4	5.68	5.75	5.85	5.97	5.96	6.31	6.27	1997-10-06	1
1	1	1	1	1	6.24		6.24	6.24	6.24	6.24	6.24	6.24	6.24	6.24	6.24	6.24	6.24	0.615888	0.84373		35710	N/A	5.06	5.19	5.38	5.67	5.73	5.82	5.95	5.94	6.29	6.24	1997-10-07	1
1	1	1	1	1	6.37		6.37	6.37	6.37	6.37	6.37	6.37	6.37	6.37	6.37	6.37	6.37	0.650867	0.900811		35711	N/A	5.09	5.25	5.46	5.79	5.85	5.96	6.09	6.08	6.41	6.37	1997-10-08	1
1	1	1	1	1	6.38		6.38	6.38	6.38	6.38	6.38	6.38	6.38	6.38	6.38	6.38	6.38	0.635739	0.877542		35712	N/A	5.14	5.3	5.48	5.8	5.86	5.98	6.1	6.09	6.43	6.38	1997-10-09	1
1	1	1	1	1	6.44		6.44	6.44	6.44	6.44	6.44	6.44	6.44	6.44	6.44	6.44	6.44	0.652882	0.904522		35713	N/A	5.14	5.32	5.54	5.86	5.92	6.03	6.17	6.15	6.49	6.44	1997-10-10	1
1	1	1	1	1	6.36		6.36	6.36	6.36	6.36	6.36	6.36	6.36	6.36	6.36	6.36	6.36	0.623312	0.862659		35717	N/A	5.08	5.34	5.5	5.81	5.87	5.97	6.09	6.07	6.42	6.36	1997-10-14	1
1	1	1	1	1	6.39		6.39	6.39	6.39	6.39	6.39	6.39	6.39	6.39	6.39	6.39	6.39	0.638058	0.886657		35718	N/A	5.06	5.34	5.52	5.84	5.9	6	6.13	6.1	6.45	6.39	1997-10-15	1
1	1	1	1	1	6.39		6.39	6.39	6.39	6.39	6.39	6.39	6.39	6.39	6.39	6.39	6.39	0.641228	0.890416		35719	N/A	5.07	5.32	5.51	5.84	5.9	6	6.12	6.09	6.45	6.39	1997-10-16	1
1	1	1	1	1	6.44		6.44	6.44	6.44	6.44	6.44	6.44	6.44	6.44	6.44	6.44	6.44	0.651802	0.91562		35720	N/A	5.06	5.33	5.56	5.91	5.98	6.08	6.19	6.17	6.51	6.44	1997-10-17	1
1	1	1	1	1	6.42		6.42	6.42	6.42	6.42	6.42	6.42	6.42	6.42	6.42	6.42	6.42	0.629784	0.883459		35723	N/A	5.09	5.36	5.56	5.9	5.97	6.07	6.18	6.15	6.49	6.42	1997-10-20	1
1	1	1	1	1	6.42		6.42	6.42	6.42	6.42	6.42	6.42	6.42	6.42	6.42	6.42	6.42	0.627665	0.880523		35724	N/A	5.07	5.38	5.57	5.92	5.98	6.07	6.18	6.14	6.49	6.42	1997-10-21	1
1	1	1	1	1	6.41		6.41	6.41	6.41	6.41	6.41	6.41	6.41	6.41	6.41	6.41	6.41	0.600311	0.836827		35725	N/A	5.16	5.41	5.58	5.91	5.97	6.06	6.17	6.12	6.48	6.41	1997-10-22	1
1	1	1	1	1	6.33		6.33	6.33	6.33	6.33	6.33	6.33	6.33	6.33	6.33	6.33	6.33	0.598111	0.826378		35726	N/A	5.13	5.35	5.48	5.79	5.86	5.95	6.07	6.04	6.39	6.33	1997-10-23	1
1	1	1	1	1	6.3		6.3	6.3	6.3	6.3	6.3	6.3	6.3	6.3	6.3	6.3	6.3	0.577062	0.798837		35727	N/A	5.15	5.35	5.46	5.79	5.86	5.94	6.05	6.01	6.35	6.3	1997-10-24	1
1	1	1	1	1	6.24		6.24	6.24	6.24	6.24	6.24	6.24	6.24	6.24	6.24	6.24	6.24	0.63018	0.857076		35730	N/A	5.08	5.22	5.29	5.62	5.7	5.79	5.94	5.91	6.29	6.24	1997-10-27	1
1	1	1	1	1	6.29		6.29	6.29	6.29	6.29	6.29	6.29	6.29	6.29	6.29	6.29	6.29	0.576983	0.784869		35731	N/A	5.25	5.33	5.41	5.74	5.8	5.89	6	5.98	6.33	6.29	1997-10-28	1
1	1	1	1	1	6.23		6.23	6.23	6.23	6.23	6.23	6.23	6.23	6.23	6.23	6.23	6.23	0.582814	0.788733		35732	N/A	5.19	5.26	5.35	5.67	5.74	5.78	5.95	5.91	6.28	6.23	1997-10-29	1
1	1	1	1	1	6.17		6.17	6.17	6.17	6.17	6.17	6.17	6.17	6.17	6.17	6.17	6.17	0.562195	0.757047		35733	N/A	5.17	5.25	5.33	5.61	5.7	5.73	5.88	5.84	6.23	6.17	1997-10-30	1
1	1	1	1	1	6.15		6.15	6.15	6.15	6.15	6.15	6.15	6.15	6.15	6.15	6.15	6.15	0.525054	0.702424		35734	N/A	5.21	5.32	5.36	5.63	5.7	5.72	5.87	5.84	6.21	6.15	1997-10-31	1
1	1	1	1	1	6.21		6.21	6.21	6.21	6.21	6.21	6.21	6.21	6.21	6.21	6.21	6.21	0.525867	0.70787		35737	N/A	5.26	5.35	5.44	5.69	5.77	5.79	5.94	5.91	6.27	6.21	1997-11-03	1
1	1	1	1	1	6.25		6.25	6.25	6.25	6.25	6.25	6.25	6.25	6.25	6.25	6.25	6.25	0.545786	0.735459		35738	N/A	5.25	5.35	5.46	5.73	5.77	5.83	5.98	5.95	6.3	6.25	1997-11-04	1
1	1	1	1	1	6.24		6.24	6.24	6.24	6.24	6.24	6.24	6.24	6.24	6.24	6.24	6.24	0.539672	0.730958		35739	N/A	5.27	5.32	5.45	5.73	5.78	5.84	5.97	5.95	6.3	6.24	1997-11-05	1
1	1	1	1	1	6.15		6.15	6.15	6.15	6.15	6.15	6.15	6.15	6.15	6.15	6.15	6.15	0.481824	0.655225		35740	N/A	5.31	5.31	5.42	5.7	5.76	5.79	5.92	5.9	6.25	6.15	1997-11-06	1
1	1	1	1	1	6.14		6.14	6.14	6.14	6.14	6.14	6.14	6.14	6.14	6.14	6.14	6.14	0.468285	0.640047		35741	N/A	5.31	5.33	5.42	5.71	5.77	5.81	5.92	5.9	6.25	6.14	1997-11-07	1
1	1	1	1	1	6.15		6.15	6.15	6.15	6.15	6.15	6.15	6.15	6.15	6.15	6.15	6.15	0.454923	0.619516		35744	N/A	5.32	5.39	5.46	5.73	5.78	5.82	5.94	5.91	6.25	6.15	1997-11-10	1
1	1	1	1	1	6.13		6.13	6.13	6.13	6.13	6.13	6.13	6.13	6.13	6.13	6.13	6.13	0.456508	0.623121		35746	N/A	5.3	5.37	5.43	5.7	5.76	5.81	5.92	5.89	6.23	6.13	1997-11-12	1
1	1	1	1	1	6.11		6.11	6.11	6.11	6.11	6.11	6.11	6.11	6.11	6.11	6.11	6.11	0.451372	0.616019		35747	N/A	5.27	5.37	5.42	5.7	5.75	5.79	5.9	5.87	6.21	6.11	1997-11-13	1
1	1	1	1	1	6.09		6.09	6.09	6.09	6.09	6.09	6.09	6.09	6.09	6.09	6.09	6.09	0.436786	0.598832		35748	N/A	5.27	5.36	5.43	5.7	5.74	5.8	5.9	5.86	6.19	6.09	1997-11-14	1
1	1	1	1	1	6.07		6.07	6.07	6.07	6.07	6.07	6.07	6.07	6.07	6.07	6.07	6.07	0.411085	0.561249		35751	N/A	5.31	5.38	5.45	5.7	5.74	5.79	5.88	5.85	6.18	6.07	1997-11-17	1
1	1	1	1	1	6.07		6.07	6.07	6.07	6.07	6.07	6.07	6.07	6.07	6.07	6.07	6.07	0.404081	0.550945		35752	N/A	5.31	5.39	5.48	5.71	5.74	5.8	5.88	5.85	6.18	6.07	1997-11-18	1
1	1	1	1	1	6.03		6.03	6.03	6.03	6.03	6.03	6.03	6.03	6.03	6.03	6.03	6.03	0.388412	0.530566		35753	N/A	5.28	5.38	5.47	5.7	5.72	5.77	5.84	5.82	6.12	6.03	1997-11-19	1
1	1	1	1	1	6.05		6.05	6.05	6.05	6.05	6.05	6.05	6.05	6.05	6.05	6.05	6.05	0.391698	0.537494		35754	N/A	5.28	5.39	5.49	5.73	5.74	5.8	5.87	5.84	6.14	6.05	1997-11-20	1
1	1	1	1	1	6.04		6.04	6.04	6.04	6.04	6.04	6.04	6.04	6.04	6.04	6.04	6.04	0.414169	0.566021		35755	N/A	5.25	5.35	5.43	5.68	5.7	5.77	5.84	5.82	6.13	6.04	1997-11-21	1
1	1	1	1	1	6.08		6.08	6.08	6.08	6.08	6.08	6.08	6.08	6.08	6.08	6.08	6.08	0.408311	0.557781		35758	N/A	5.29	5.43	5.47	5.71	5.75	5.81	5.88	5.86	6.17	6.08	1997-11-24	1
1	1	1	1	1	6.06		6.06	6.06	6.06	6.06	6.06	6.06	6.06	6.06	6.06	6.06	6.06	0.38577	0.526308		35759	N/A	5.3	5.46	5.49	5.71	5.75	5.8	5.87	5.85	6.15	6.06	1997-11-25	1
1	1	1	1	1	6.06		6.06	6.06	6.06	6.06	6.06	6.06	6.06	6.06	6.06	6.06	6.06	0.391106	0.541406		35760	N/A	5.26	5.42	5.5	5.74	5.77	5.82	5.89	5.86	6.14	6.06	1997-11-26	1
1	1	1	1	1	6.04		6.04	6.04	6.04	6.04	6.04	6.04	6.04	6.04	6.04	6.04	6.04	0.376141	0.527883		35762	N/A	5.22	5.43	5.52	5.76	5.8	5.83	5.89	5.86	6.12	6.04	1997-11-28	1
1	1	1	1	1	6.04		6.04	6.04	6.04	6.04	6.04	6.04	6.04	6.04	6.04	6.04	6.04	0.362203	0.505035		35765	N/A	5.27	5.42	5.56	5.78	5.8	5.83	5.88	5.86	6.13	6.04	1997-12-01	1
1	1	1	1	1	6.03		6.03	6.03	6.03	6.03	6.03	6.03	6.03	6.03	6.03	6.03	6.03	0.358203	0.502135		35766	N/A	5.26	5.41	5.56	5.78	5.8	5.83	5.88	5.86	6.11	6.03	1997-12-02	1
1	1	1	1	1	6.02		6.02	6.02	6.02	6.02	6.02	6.02	6.02	6.02	6.02	6.02	6.02	0.364667	0.506063		35767	N/A	5.26	5.4	5.53	5.74	5.77	5.8	5.85	5.83	6.1	6.02	1997-12-03	1
1	1	1	1	1	6.04		6.04	6.04	6.04	6.04	6.04	6.04	6.04	6.04	6.04	6.04	6.04	0.386464	0.531771		35768	N/A	5.27	5.4	5.49	5.71	5.75	5.78	5.86	5.84	6.11	6.04	1997-12-04	1
1	1	1	1	1	6.09		6.09	6.09	6.09	6.09	6.09	6.09	6.09	6.09	6.09	6.09	6.09	0.371899	0.519442		35769	N/A	5.3	5.49	5.56	5.8	5.83	5.87	5.94	5.92	6.16	6.09	1997-12-05	1
1	1	1	1	1	6.14		6.14	6.14	6.14	6.14	6.14	6.14	6.14	6.14	6.14	6.14	6.14	0.381266	0.53194		35772	N/A	5.29	5.55	5.63	5.85	5.87	5.92	5.98	5.96	6.21	6.14	1997-12-08	1
1	1	1	1	1	6.14		6.14	6.14	6.14	6.14	6.14	6.14	6.14	6.14	6.14	6.14	6.14	0.402695	0.561765		35773	N/A	5.27	5.5	5.59	5.81	5.86	5.9	5.97	5.95	6.21	6.14	1997-12-09	1
1	1	1	1	1	6.1		6.1	6.1	6.1	6.1	6.1	6.1	6.1	6.1	6.1	6.1	6.1	0.419328	0.582804		35774	N/A	5.21	5.44	5.51	5.75	5.79	5.85	5.92	5.9	6.17	6.1	1997-12-10	1
1	1	1	1	1	6.02		6.02	6.02	6.02	6.02	6.02	6.02	6.02	6.02	6.02	6.02	6.02	0.39422	0.543415		35775	N/A	5.2	5.39	5.48	5.68	5.72	5.77	5.84	5.82	6.11	6.02	1997-12-11	1
1	1	1	1	1	5.94		5.94	5.94	5.94	5.94	5.94	5.94	5.94	5.94	5.94	5.94	5.94	0.36909	0.50837		35776	N/A	5.18	5.35	5.42	5.63	5.67	5.71	5.76	5.74	6.03	5.94	1997-12-12	1
1	1	1	1	1	5.97		5.97	5.97	5.97	5.97	5.97	5.97	5.97	5.97	5.97	5.97	5.97	0.356013	0.488938		35779	N/A	5.23	5.41	5.47	5.68	5.7	5.74	5.8	5.78	6.06	5.97	1997-12-15	1
1	1	1	1	1	5.96		5.96	5.96	5.96	5.96	5.96	5.96	5.96	5.96	5.96	5.96	5.96	0.351115	0.482701		35780	N/A	5.23	5.4	5.47	5.68	5.69	5.74	5.8	5.77	6.05	5.96	1997-12-16	1
1	1	1	1	1	5.99		5.99	5.99	5.99	5.99	5.99	5.99	5.99	5.99	5.99	5.99	5.99	0.355144	0.489224		35781	N/A	5.25	5.42	5.5	5.7	5.72	5.77	5.82	5.81	6.08	5.99	1997-12-17	1
1	1	1	1	1	5.94		5.94	5.94	5.94	5.94	5.94	5.94	5.94	5.94	5.94	5.94	5.94	0.330165	0.453982		35782	N/A	5.24	5.42	5.49	5.68	5.69	5.74	5.78	5.76	6.03	5.94	1997-12-18	1
1	1	1	1	1	5.92		5.92	5.92	5.92	5.92	5.92	5.92	5.92	5.92	5.92	5.92	5.92	0.300515	0.400924		35783	N/A	5.33	5.46	5.5	5.66	5.67	5.7	5.74	5.72	6	5.92	1997-12-19	1
1	1	1	1	1	5.89		5.89	5.89	5.89	5.89	5.89	5.89	5.89	5.89	5.89	5.89	5.89	0.233452	0.306627		35786	N/A	5.46	5.53	5.55	5.69	5.7	5.71	5.73	5.72	5.97	5.89	1997-12-22	1
1	1	1	1	1	5.9		5.9	5.9	5.9	5.9	5.9	5.9	5.9	5.9	5.9	5.9	5.9	0.240095	0.315309		35787	N/A	5.46	5.53	5.55	5.69	5.7	5.71	5.74	5.73	5.98	5.9	1997-12-23	1
1	1	1	1	1	5.91		5.91	5.91	5.91	5.91	5.91	5.91	5.91	5.91	5.91	5.91	5.91	0.266458	0.361054		35788	N/A	5.38	5.49	5.54	5.67	5.71	5.72	5.76	5.76	6	5.91	1997-12-24	1
1	1	1	1	1	5.9		5.9	5.9	5.9	5.9	5.9	5.9	5.9	5.9	5.9	5.9	5.9	0.266117	0.363621		35790	N/A	5.35	5.47	5.54	5.69	5.72	5.72	5.75	5.75	5.99	5.9	1997-12-26	1
[truncated: 4,759 more rows]

## Sheet: Instructions
Enable the Macro
Goto the 1990-2016 Tab, Click "View", Click "Macros", and "Run"
Note the R/C estimate in the paper was produced using Microsoft Office Excel 2007, different version of excel and/or solver may produce slightly different results.
Note Solver must be installed, verify under the "Data" tab
